# Supplementary material for: The oncogenic role of LncRNA FAM83C-AS1 in colorectal cancer development by epigenetically inhibits SEMA3F via stabilizing EZH2
Source: Aging (Albany NY). 2020 Oct 27;12(20):20396–412. doi: 10.18632/aging.103835 (PMC7655168; doi:10.18632/aging.103835)
Supplement: Supplementary Table 1 [file aging-12-103835-s002..xlsx]

## Sheet: Sheet1
Supplementary Table 1. LncRNAs with high expression in CRC tumor tissues were obtained by exploring the website of GEO DataSets.
ID	adj.P.Val	P.Value	logFC	GENE_TYPE	RNA_ACCESSIONS	RNA_SOURCE	RANGE_START	RANGE_END	GENE_NAME	DESCRIPTION	ASSOCIATED_GENE_STRAND	SEQUENCE	GB_ACC	SPOT_ID
CUST_141792_PI430048170	1.55e-10	2.37e-15	6.15862	mRNA	NM_001293298	RefSeq	80779342	80951662	CEMIP	cell migration inducing protein%2C hyaluronan binding%2C transcript variant 1		TCGGGAGTTAGATGTATAGAGTGTTTGTATGTAAACATTTCTTGTAGGCATCACCATGAA	NM_001293298
CUST_5377_PI430048170	3.43e-06	1.07e-08	5.77126	ncRNA	NR_108049	RefSeq	127207381	127219268	CCAT1	colon cancer associated transcript 1 (non-protein coding)		AGGAAGGCTCGCTAGAATACTTTGTGATATTGGATATTAGTTCCATATTCTACTGTGTAT	NR_108049
CUST_135275_PI430048170	1.67e-09	7.64e-14	-5.44644	mRNA	NM_153267	RefSeq	19468	152600	MAMDC2	MAM domain containing 2%2C transcript variant 1		TCCCCCTTTGAACTACCTTTGAAGTCACTATGAGCACATGGATAGAAATTTAACTTTTTT	NM_153267
CUST_139591_PI430048170	4.73e-09	2.98e-13	-4.66278	mRNA	NM_021189	RefSeq	159171586	159203142	CADM3	cell adhesion molecule 3%2C transcript variant 1		TCTAACTCTCCTGTGCTAATCTCAGAGGGGTCACCCTCAATATATCTGGATTATCCGTGT	NM_021189
CUST_132940_PI430048170	4.73e-09	3.61e-13	4.66288	mRNA	NM_001079675	RefSeq	43527842	43546432	ETV4	ets variant 4%2C transcript variant 2		TATAAATGAATCTGGTGTTGGGGAAACCTTCATCTGAAACCCACAGATGTCTCTGGGGCA	NM_001079675
CUST_125137_PI430048170	0.000159	4.24e-06	5.57745	ncRNA	NR_036484	RefSeq	122303657	122310077	FEZF1-AS1	FEZF1 antisense RNA 1	-	CACGGTTCGACTGTTTCCTTGACACTACCCACGAAGTTTAAAGCATTTTTTATGTTATTT	NR_036484
CUST_73380_PI430048170	5.7e-09	6.09e-13	-5.355	ncRNA	lnc-IGSF11-6:1	lncipedia	117512885	117514875				AAATGCCCATAAAAGCTTTTGAGACTTGTGAAGATGCCATTTGTTGTTCAAACGTGCACC		lnc-IGSF11-6:1
CUST_99490_PI430048170	8.24e-09	1.17e-12	-2.87809	ncRNA	lnc-PDE6C-3:1	lncipedia	93757920	93758912			+	TCACGCCATCGCTGCAGCTCTTGTGAGAAATATTTATATCATGACTATTTTTAATATGGC		lnc-PDE6C-3:1
CUST_117376_PI430048170	8.24e-09	1.2e-12	-3.59419	ncRNA	ENST00000604392	ENSEMBL_GENCODE	68632663	68635027	RP3-525N10.2		+	TCTTGCATTGCTTTGTGCTTGGCAATGGAATCATGGTTTCGGGATAGTCATTTTGCCTCC		ENST00000604392
CUST_127509_PI430048170	8.24e-09	1.26e-12	-6.11604	mRNA	NM_001199635	RefSeq	31052460	31111479	ADCYAP1R1	adenylate cyclase activating polypeptide 1 (pituitary) receptor type I%2C transcript variant 1		AAGGATGTCAGACTGCTGTAGATGACTCAATAAATGTTTTGCCATTTTTCCTGGAAAAAA	NM_001199635
CUST_1488_PI430048170	1.43e-09	4.35e-14	5.30484	ncRNA	NR_125365	RefSeq	45848073	45851490	LOC401585	uncharacterized LOC401585		GATGAGAGACATGTTTGTAATGTTATTCGTTGTGACACAGTTCAAAAGAATTTGCCTTTG	NR_125365
CUST_142033_PI430048170	1.9e-08	3.49e-12	-2.00816	mRNA	NM_014033	RefSeq	50924750	50932517	METTL7A	methyltransferase like 7A		AAAGCGAGTGTTAGGTTGGTTAGAGGGTTTAATATTTTCTGCAATGGTTTGTAGGAATTT	NM_014033
CUST_129162_PI430048170	2.21e-08	4.39e-12	-5.23651	mRNA	NM_006262	RefSeq	49295125	49298698	PRPH	peripherin		GGGTCTGAGTTTCACATTTGAACCAAATAAAATGCTGTCAAGAGAAAACTCTCCAGTGCA	NM_006262
CUST_139590_PI430048170	2.26e-08	4.84e-12	-5.15294	mRNA	NM_001167674	RefSeq	84958981	86074429	CADM2	cell adhesion molecule 2%2C transcript variant 1		AAGGCTGTACAAGATTTAGTGTCATTGGGTCTCATATTTGTGTTAGACCATGAAATATTC	NM_001167674
CUST_41403_PI430048170	3.89e-06	1.34e-08	5.0847	ncRNA	lnc-TMEM75-3:5	lncipedia	127077558	127294792				TAGTTCCTAGCCATAGTCCGGAGATATTTTAAAAACTTTAGTGTGAGTTATTTCTCTTTG		lnc-TMEM75-3:5
CUST_139366_PI430048170	2.9e-08	7.23e-12	-2.94274	mRNA	NM_002285	RefSeq	99547253	100142575	AFF3	AF4/FMR2 family%2C member 3%2C transcript variant 1		GGAATTTATAAACGGACTTGGATTAAACATGTCTGCCTTTCTAAGGTTGCAAATGTTACA	NM_002285
CUST_44425_PI430048170	2.9e-08	7.79e-12	-3.38915	ncRNA	lnc-IGSF11-2:1	lncipedia	117678769	117691199				TAGTGCACTCAAATTGAGAACACAGCTTCACAGGCAGAACACAACACACAGATGCAAGGT		lnc-IGSF11-2:1
CUST_73386_PI430048170	2.9e-08	8.16e-12	-4.46025	ncRNA	lnc-IGSF11-5:1	lncipedia	117992496	117994310				GATGAGCATTGACTACACTATGAAGCCTCTCTGTTTAAGATACAGGAGAAACTTAGCTCC		lnc-IGSF11-5:1
CUST_45401_PI430048170	3.5e-05	4.08e-07	4.73857	ncRNA	ENST00000455974	ENSEMBL_GENCODE	34203244	34268811	AC123023.1			ACTGTCTGAATGCAAAGGAAATTTAGCTCTTATGAATATGAACTCTCAACCAAGAATCAC		ENST00000455974
CUST_64676_PI430048170	3.09e-08	9.43e-12	-3.37651	mRNA	NM_001278717	RefSeq	35138992	35143055	FXYD1	FXYD domain containing ion transport regulator 1%2C transcript variant c		AAAGGAACACGACCCGTTCACTTACGACTACCAGTCCCTGCAGATCGGAGGCCTCGTCAT	NM_001278717
CUST_144691_PI430048170	3.61e-08	1.16e-11	3.01145	mRNA	NM_030567	RefSeq	177446794	177456286	PRR7	proline rich 7 (synaptic)%2C transcript variant 1		ATTTCTTATCCCGTTTGTTACATTTTGAGGATAATAAAGGTGTGTGATCTGGTTTGGTAC	NM_030567
CUST_100650_PI430048170	3.68e-06	1.2e-08	4.67333	ncRNA	NR_046225	RefSeq	62774120	62776856	LINC00659	long intergenic non-protein coding RNA 659%2C transcript variant 2	-	ATCATCTTCACGCCAAGTCTGGAAAAAATGGCTTTGAGGTTGTGCACACAAAGGAAGGAG	NR_046225
CUST_94052_PI430048170	3.67e-08	1.37e-11	-5.01138	ncRNA	lnc-SMC5-7:1	lncipedia	70168614	70170782			+	TGTGCAAAATTATGTCTTGTGTCTATAATGAAATGCACTTGTGATTCTACACACACAGGA		lnc-SMC5-7:1
CUST_19675_PI430048170	6.81e-06	3.06e-08	4.59703	ncRNA	ENST00000439852	ENSEMBL_GENCODE	34566723	34758272	NPSR1-AS1		+	GAACCTGGTAGTGTCATCTTTAGAAGTGAAGACACAATTAACACATGGTCATTTCTTCAT		ENST00000439852
CUST_124224_PI430048170	3.67e-08	1.4e-11	-2.73176	ncRNA	NR_109982	RefSeq	133502251	133889006	TARID	TCF21 antisense RNA inducing promoter demethylation	+	CATTTAAGTGTAGTGAATGTTGAGTTTAGGGTCTAAAATGAGGTGATAGCAAAATCTTGG	NR_109982
CUST_16267_PI430048170	4.51e-08	1.79e-11	-3.67593	ncRNA	ENST00000609450	ENSEMBL_GENCODE	87460807	87462280	RP11-710E1.2		+	CAGTGAAAACTCCAAAAAACCATAAAGAATGTATCTAGACCATGGGCTTTAGTCATACTT		ENST00000609450
CUST_20154_PI430048170	0.0011	6.38e-05	4.51062	ncRNA	NR_036484	RefSeq	122303657	122310077	FEZF1-AS1	FEZF1 antisense RNA 1	-	AAGTCCCTATCATAAGCAAATGCAGTTTCTGGCTATGGTTACTGCAATTCGAAATAAAAG	NR_036484
CUST_126724_PI430048170	4.69e-08	2.01e-11	-4.84875	mRNA	NM_001704	RefSeq	68635739	69389511	ADGRB3	adhesion G protein-coupled receptor B3		CTCTGAGAAGCTTTCTCTGCTGCAGCTGTGTATAAAATATTTAAAATGTTGTATGGTGTA	NM_001704
CUST_119474_PI430048170	5.74e-08	2.58e-11	-2.5398	ncRNA	lnc-AP000708.1.1-1:1	lncipedia	125417458	125420180			+	GTTCAAAAGCTTGCTTTACTATTCCCACTCAGCTAAGATCAGCTTCATGGGAAGAATGGG		lnc-AP000708.1.1-1:1
CUST_3206_PI430048170	5.74e-08	2.7e-11	2.23358	mRNA	NM_001256574	RefSeq	74627405	74641424	ENC1	ectodermal-neural cortex 1 (with BTB domain)%2C transcript variant 2		AACACATAACAAAGGGCAGCCCTCCACTTCTGGTATAATTGTGTAGCCCCTTTTCTTTGG	NM_001256574
CUST_133607_PI430048170	5.74e-08	2.72e-11	-5.85642	mRNA	NM_178013	RefSeq	832859	902982	PRIMA1	proline rich membrane anchor 1		GGGTGTCCATATGCCACTTATGAGGAAGAAAGCACCATGACTTTTTTATTTTCAATAAAA	NM_178013
CUST_130802_PI430048170	5.93e-08	2.9e-11	-5.36611	mRNA	NM_006691	RefSeq	10557865	10568818	LYVE1	lymphatic vessel endothelial hyaluronan receptor 1		CCTTTTTCCAACAAGAAGGGACTGAGAGATGCAGAAATATTTGTGACAAAAAATTAAAGC	NM_006691
CUST_137509_PI430048170	6.32e-08	3.24e-11	-4.79533	mRNA	NM_001288985	RefSeq	68867286	68955392	ABCA8	ATP-binding cassette%2C sub-family A (ABC1)%2C member 8%2C transcript variant 1		GTTCACAAATGTAGCAACAGCTCACATGACTGAGTAGGTAGAAAATGTGAAATAAATCTC	NM_001288985
CUST_136618_PI430048170	6.32e-08	3.28e-11	4.73119	mRNA	NM_020436	RefSeq	51784043	51802509	SALL4	spalt-like transcription factor 4		GGCAAGTGCTACAATCACGATTGTTGCTATGCTGCTTTGCAAAAAGTTGAAAAAATAAAA	NM_020436
CUST_140877_PI430048170	7.83e-08	4.18e-11	3.75928	mRNA	NM_001081492	RefSeq	52168995	52192000	KRT80	keratin 80%2C type II%2C transcript variant 2		AGGGACTTAGTTATATCTTCAGACCAGTGCAGCTGGTACACACAAAGTTCTCCTGTCTCA	NM_001081492
CUST_127126_PI430048170	8.93e-08	4.91e-11	-3.97739	mRNA	NM_004246	RefSeq	9825550	9892103	GLP2R	glucagon-like peptide 2 receptor		GTTTTAGGATGGGGATGGAGGCAAAGGCATCAGGCAAGTAATGAAGCAAAGGTTTATTTT	NM_004246
CUST_145122_PI430048170	9.76e-08	5.51e-11	8.64881	mRNA	NM_002423	RefSeq	102520507	102530747	MMP7	matrix metallopeptidase 7		GACTGTGTCTTATTCATCTATACTTGCAGTGGGTAGATGTCAATAAATGTTACATACACA	NM_002423
CUST_140851_PI430048170	1.43e-07	8.28e-11	1.43175	mRNA	NM_014062	RefSeq	69741853	69754968	NOB1	NIN1/RPN12 binding protein 1 homolog (S. cerevisiae)%2C transcript variant 1		TGAGCTGTGTGCCCAGAGATCATGCATTTAGATTTATATTTTTGCCAGAAAATACAAGGT	NM_014062
CUST_142050_PI430048170	1.49e-07	8.86e-11	2.5253	mRNA	NM_001256574	RefSeq	74627405	74641424	ENC1	ectodermal-neural cortex 1 (with BTB domain)%2C transcript variant 2		CCATGTGGTTCACGTACAAAACTCTGTATAAGTTGAAGGAAAATGTTCATGTTCATATGT	NM_001256574
CUST_145481_PI430048170	1.51e-07	9.19e-11	-4.07462	mRNA	NM_001007156	RefSeq	87977364	88256731	NTRK3	neurotrophic tyrosine kinase%2C receptor%2C type 3%2C transcript variant 3		GGGCGTTGTGTTTCCACAGAGACTTATAGGAGTGTTCAGTGTATAGTTTCTTAATAAACA	NM_001007156
CUST_144757_PI430048170	1.53e-07	9.55e-11	-4.34578	mRNA	NM_152459	RefSeq	5044121	5066145	C16orf89	chromosome 16 open reading frame 89%2C transcript variant 1		AAGCTATTCAATATCAGCAGCATTTTTCGAGGAGAGTGAAGAGGCGAGAAAAACAATTTC	NM_152459
CUST_48179_PI430048170	7.03e-05	1.23e-06	4.48742	ncRNA	NR_034119	RefSeq	106376562	106377792	LINC00460	long intergenic non-protein coding RNA 460		CGCCTCTGAAATGGTGACAATAACACTGTGTATTTCCTACTTTATGATCAGGATTAATAA	NR_034119
CUST_57830_PI430048170	3.14e-06	9.24e-09	4.34758	ncRNA	lnc-TPCN2-11:7	lncipedia	69337359	69367726				GTAGATGAAGACTGGCAGGGCTGAAGAAATGATCTCATGTTGAAATTAATGATGAGCTTC		lnc-TPCN2-11:7
CUST_102881_PI430048170	1.59e-07	1.07e-10	-3.79118	ncRNA	lnc-ETV5-2:1	lncipedia	186257763	186261959			-	GGCGTTTGCTGCTTATTTATAGTAAGCGTATTTACAATCAGCAGAAGGCAATAAAAAAGA		lnc-ETV5-2:1
CUST_66802_PI430048170	1.72e-07	1.18e-10	-5.75781	mRNA	NM_002976	RefSeq	166403572	166486971	SCN7A	sodium channel%2C voltage gated%2C type VII alpha subunit%2C transcript variant 1		TGCTACTAAAGAAGGTGCCTATTTTGACAAAGCTAAGGAAAAGTCACCTATTCAAAGCCA	NM_002976
CUST_133286_PI430048170	1.87e-07	1.32e-10	-4.36265	mRNA	NM_001159704	RefSeq	136169295	136211359	FHL1	four and a half LIM domains 1%2C transcript variant 4		CTGATGCCTCATTTCTACATTCTGTCATTAGCTATTATCATCTAACGTTTCAGTGTATCC	NM_001159704
CUST_69337_PI430048170	1.89e-07	1.35e-10	-2.78126	mRNA	NM_018968	RefSeq	4167	64734	SNTG2	syntrophin%2C gamma 2		CCTGCAGAATATTGCAACTTTGTGTTGTTTTATGATGAGCCTATAGTTGTGATACCAATA	NM_018968
CUST_145298_PI430048170	1.91e-07	1.4e-10	-5.32287	mRNA	NM_020783	RefSeq	43267891	43277650	SYT4	synaptotagmin IV		CTGTATGATGTTTGTAAGACCATGTTTGTAAGACATGAATAAATTGCTGCTTTTGCCCAA	NM_020783
CUST_73280_PI430048170	2.31e-07	1.72e-10	-2.90948	ncRNA	lnc-IMPG2-3:1	lncipedia	100830577	100837323			-	TACCTCAAACTAAACTGGTTCCTGCCACAATCCTCGAACCAGTTCTTAGAACTGAGGCTT		lnc-IMPG2-3:1
CUST_69924_PI430048170	0.00328	0.000281	4.2359	ncRNA	NR_110589	RefSeq	49959451	49962924	LOC101927318	uncharacterized LOC101927318%2C transcript variant 2	+	GGCCAAGACCTTGTTCTTGCCATTTTAGAGATTCAGAATATAATCTACAAAGTTAGAGAT	NR_110589
CUST_132981_PI430048170	2.39e-07	1.89e-10	-4.0025	mRNA	NM_014079	RefSeq	126342634	126357393	KLF15	Kruppel-like factor 15		GACAGGTTTATTTCACATCCTATGAATGTATGTAAATAAACTGTACATAGGTCCATCCAC	NM_014079
CUST_137685_PI430048170	2.39e-07	1.9e-10	2.21115	mRNA	NM_001258446	RefSeq	143309325	143359977	TOP1MT	topoisomerase (DNA) I%2C mitochondrial%2C transcript variant 2		CAGTACTGGGGAATTTTGTACAATAAAATGTGTGCAAGTGCTTGTACATCACTAGAAAAA	NM_001258446
CUST_82133_PI430048170	2.9e-08	8.41e-12	4.12141	ncRNA	lnc-OR13H1-5:1	lncipedia	131713548	131721383				AAAGGGTTGTACTCTGGCCATTCACGTGAACAAAATCTGCTGGGTTAATTGGTTTGGTTT		lnc-OR13H1-5:1
CUST_19086_PI430048170	2.74e-07	2.26e-10	-2.16749	ncRNA	ENST00000457081	ENSEMBL_GENCODE	133452857	133456605	RP1-283K11.2		+	CACCGTATTTCTCAACCAAATGCAAGCTTACACACCAAATGTTTTGATTTCAAAAGAAAC		ENST00000457081
CUST_50659_PI430048170	0.000676	3.26e-05	4.09423	ncRNA	NR_015379	RefSeq	15828946	15836321	UCA1	urothelial cancer associated 1 (non-protein coding)	-	AACATTATTCCTTCCTTGGCCTAAAAACTCATCGCCACCTACATTAAAGCTAATATGCCT	NR_015379
CUST_145196_PI430048170	2.75e-07	2.35e-10	-4.77356	mRNA	NM_002594	RefSeq	17226951	17484577	PCSK2	proprotein convertase subtilisin/kexin type 2%2C transcript variant 1		TCTCGCTAGTGATGTTTTTATGATATCCCTGATCCTAACTGAAGAGACAGTTATTTATAG	NM_002594
CUST_140466_PI430048170	3.04e-07	2.65e-10	3.54918	mRNA	NM_001130958	RefSeq	160187366	160238722	FABP6	fatty acid binding protein 6%2C ileal%2C transcript variant 3		AGAATTATGATGAGTTCATGAAGCTCCTTGGGATCTCCAGCGATGTAATCGAAAAGGCCC	NM_001130958
CUST_81682_PI430048170	5.3e-09	4.85e-13	3.95343	ncRNA	lnc-ZNF674-3:2	lncipedia	45847894	45851017				TTTGTGGGCTTTTACTTTCTTTCCTGGGAATGGTAGGCCATAGCTATTGGTATGTTTTTT		lnc-ZNF674-3:2
CUST_140599_PI430048170	3.64e-07	3.28e-10	-3.66166	mRNA	NM_004711	RefSeq	39349948	39385588	SYNGR1	synaptogyrin 1%2C transcript variant 1a		TGACTTCTGGTGACATAGTAATAAAGTGAAGACTCAGAACCCACCAGCGATTGCAAAAAA	NM_004711
CUST_144000_PI430048170	3.66e-07	3.39e-10	-5.15765	mRNA	NM_020066	RefSeq	240091884	240475189	FMN2	formin 2		GTGTGTATATTACCATTCTCCAATGAAATAATAGGGCATTTAACAAAGATCGCTATGTGC	NM_020066
CUST_91835_PI430048170	3.66e-07	3.41e-10	3.00541	mRNA	NM_000785	RefSeq	57762333	57767193	CYP27B1	cytochrome P450%2C family 27%2C subfamily B%2C polypeptide 1		GGAGCATCAACCTACAGTTTTTGGACAGATAGTCCCATGGAAAGAGACTGTCATCATCAC	NM_000785
CUST_130673_PI430048170	3.83e-07	3.62e-10	2.43136	mRNA	NM_001290149	RefSeq	50797692	50804853	C19orf48	chromosome 19 open reading frame 48%2C transcript variant 3		GGGCAACCCCACACCCTTGACATAAAAGCATCTTGAAGCTTTTACTCCGTTTTTAAAAAA	NM_001290149
CUST_132744_PI430048170	3.86e-07	3.71e-10	-6.20868	mRNA	NM_004975	RefSeq	49371967	49482644	KCNB1	potassium channel%2C voltage gated Shab related subfamily B%2C member 1		AACACGCTTTCTTTACATCACTAGTGTAGACTCAAAAGATATGCAAGTGTCAAATATGCA	NM_004975
CUST_22816_PI430048170	3.86e-07	3.77e-10	-4.33158	ncRNA	ENST00000613389	ENSEMBL_GENCODE	47934345	47985966	CH17-360D5.2			TCATACTGTTCCATGTTATATGTAACTGTTTTAAAGCTACATACTGGACAAAAAGTGGAA		ENST00000613389
CUST_127255_PI430048170	3.87e-07	3.84e-10	-3.16643	mRNA	NM_001496	RefSeq	138252379	138274564	GFRA3	GDNF family receptor alpha 3		ATTCCTATTATTGTCCTAAAGTCTCTCTGGGCTCTTGGATCATGATTAAACCTTTGACTT	NM_001496
CUST_83989_PI430048170	3.93e-07	3.96e-10	-2.60859	ncRNA	NR_109941	RefSeq	88883329	89032376	MEF2C-AS1	MEF2C antisense RNA 1%2C transcript variant 3	-	GGGTGAAAAACAAAAAATTGTTCTGCATAGAGTCTTCTTTAATGTCTCACTTTGGTGATG	NR_109941
CUST_75411_PI430048170	4.02e-07	4.11e-10	-5.47519	ncRNA	lnc-CARD6-3:4	lncipedia	40976662	40981766			+	TTTTAGAAAATCCGTTAACACAGGCAGTGCCTAAATGTCAGCGCTGGGAGAAACTGCAGA		lnc-CARD6-3:4
CUST_71338_PI430048170	4.28e-07	4.44e-10	-4.92598	ncRNA	lnc-KCNB1-1:2	lncipedia	49363876	49367759			-	GAATTTCTAAGCAAATGGTCCCTTAATGAAGTCTGCAGAGTTCAATAAAAGGTATGGAAA		lnc-KCNB1-1:2
CUST_128303_PI430048170	4.58e-07	4.88e-10	-5.22846	mRNA	NM_001286650	RefSeq	99306386	99321442	ADH1B	alcohol dehydrogenase 1B (class I)%2C beta polypeptide%2C transcript variant 2		CTGAGCTTGTTCATCCTTTGTTTTGAAAAAATTACTCAACCAATCCATTACAGCTTAACC	NM_001286650
CUST_63386_PI430048170	4.58e-07	4.94e-10	-3.0049	ncRNA	lnc-ABCA9-5:1	lncipedia	68877196	68880267			-	GGTCACACTGGGTAGATTTACAACTAGAAACTCCTTTCCTGGATATCAAAGTATTAAGTT		lnc-ABCA9-5:1
CUST_19087_PI430048170	4.58e-07	4.96e-10	-2.62185	ncRNA	NR_109982	RefSeq	133502251	133889006	TARID	TCF21 antisense RNA inducing promoter demethylation	+	AGTGTAGTGAATGTTGAGTTTAGGGTCTAAAATGAGGTGATAGCAAAATCTTGGATAGAG	NR_109982
CUST_141471_PI430048170	4.59e-07	5.09e-10	-1.31788	mRNA	NM_005935	RefSeq	87007000	87141039	AFF1	AF4/FMR2 family%2C member 1%2C transcript variant 2		CTTTCCAAAGACAATGTGCCACAGATCTTTTGTTCTCTGTAATGAGGATTAATTGCTGTT	NM_005935
CUST_107691_PI430048170	4.59e-07	5.12e-10	-5.34525	mRNA	NM_000587	RefSeq	40909496	40982941	C7	complement component 7		TCAGCGCTGGGAGAAACTGCAGAATTCAAGATGTGTTTGTAAAATGCCCTACGAATGTGG	NM_000587
CUST_141915_PI430048170	4.69e-07	5.3e-10	-6.23829	mRNA	NM_001128834	RefSeq	103776505	103792618	PLP1	proteolipid protein 1%2C transcript variant 3		CTGAAAACCTCACATGCATACATACACATATATACACACACAAAGAGAGTTAATCAACTG	NM_001128834
CUST_59297_PI430048170	4.91e-07	5.62e-10	-3.94555	mRNA	NM_001135805	RefSeq	78863992	79452008	SYT1	synaptotagmin I%2C transcript variant 2		CTCATTCCTGGAAATTGCACTGGAACTGTCTGATTAAGAAAAACAGAATAATTCTGAAAG	NM_001135805
CUST_97232_PI430048170	4.69e-08	1.96e-11	3.89577	ncRNA	lnc-LZTFL1-3:1	lncipedia	45790300	45796360			-	GCTCGGTGTTCCTTACATTAAACATTACATTAAACATTGTGTATATGCACACACATACAC		lnc-LZTFL1-3:1
CUST_133015_PI430048170	4.95e-07	5.82e-10	-2.75633	mRNA	NM_005715	RefSeq	148747134	149076990	UST	uronyl-2-sulfotransferase		GGAAAATTATTATTATGAACCTTCAGCCTACTTTCTTGAGTGCCGTAAAAGTGCTTGTAA	NM_005715
CUST_127586_PI430048170	5.03e-07	5.99e-10	5.77036	mRNA	NM_001199050	RefSeq	205381378	205422086	LEMD1	LEM domain containing 1%2C transcript variant 1		AAGTCATGTCAACTCTCATTAAAGGTGCTTCCATATTTGAGCAGGCGTCAAACAAGGAAA	NM_001199050
CUST_20074_PI430048170	1.61e-05	1.25e-07	3.7815	ncRNA	ENST00000602761	ENSEMBL_GENCODE	106777542	106782852	RP5-884M6.1			CTACTTTTCTCCATGAAGTTTGTCACCATCAACTGTTAAAACTGTAAAGATTTGATCAGC		ENST00000602761
CUST_137336_PI430048170	5.56e-07	6.79e-10	-5.39382	mRNA	NM_003012	RefSeq	41261956	41309471	SFRP1	secreted frizzled-related protein 1		CTCAGTTAAATCTTTGAAGAATATTTGTAGTTATCTTAGAAGATAGCATGGGAGGTGAGG	NM_003012
CUST_137943_PI430048170	5.97e-07	7.54e-10	-5.78338	mRNA	NM_003015	RefSeq	97766750	97771999	SFRP5	secreted frizzled-related protein 5		GCTGTGAGGCCATAGGTACTAGACAACCAATACATGCAGGGTTGGGTTTTCTAATTTTTT	NM_003015
CUST_45943_PI430048170	0.00866	0.00103	3.73687	ncRNA	NR_125857	RefSeq	70394201	70399417	EVADR	uncharacterized LOC101928353		CAAAAGCATTGTGCCGAACAGATGAAAAAATGCATTGTCAACGGAATCTTTTATGTTTGT	NR_125857
CUST_137333_PI430048170	5.97e-07	7.56e-10	-3.01691	mRNA	NM_018400	RefSeq	123629186	123654607	SCN3B	sodium channel%2C voltage gated%2C type III beta subunit%2C transcript variant 1		GTGCTGTTTTTCAGTAAACTCCTTGTTCATGTCAATAAAGTATCCCTGAAAACCACAAAA	NM_018400
CUST_111850_PI430048170	1.9e-08	3.2e-12	3.69991	ncRNA	lnc-ZNHIT1-1:3	lncipedia	101308298	101311734				ATTCAAATATTTAATGGGTTGTACTCTGGCCATTCAGGTGAACAAAATCTGCTGGGTTAA		lnc-ZNHIT1-1:3
CUST_50416_PI430048170	6.38e-07	8.28e-10	-4.18487	ncRNA	lnc-XKR4-1:2	lncipedia	55526174	55534073			+	ATGGCTCACGCTATGAATATTCACCTGCTTCATTTGTTTTTTCCAGTAAACGCTGTTTTG		lnc-XKR4-1:2
CUST_41044_PI430048170	0.0126	0.00173	3.69792	ncRNA	NR_125857	RefSeq	70394201	70399417	EVADR	uncharacterized LOC101928353		GCCGAACAGATGAAAAAATGCATTGTCAACGGAATCTTTTATGTTTGTTTGTCTTCCTTT	NR_125857
CUST_81681_PI430048170	3.67e-08	1.38e-11	3.65818	ncRNA	lnc-CXorf36-1:2	lncipedia	45828071	45852110				CTGGGGGGTCTTAAATTGCCTTGAACATTGTCTTTGGTTAATGCTTCATTGATGTATTTC		lnc-CXorf36-1:2
CUST_134202_PI430048170	6.97e-07	9.37e-10	-1.87405	mRNA	NM_001194986	RefSeq	47760527	47996890	TRABD2B	TraB domain containing 2B		CCCTCACCTCTGTGAATTATCATGAAGAGTCCTTTAAGAGTATAAATAGAAGACAAAGAA	NM_001194986
CUST_133647_PI430048170	7.07e-07	9.61e-10	1.48409	mRNA	NM_001136005	RefSeq	108060	115590	GART	phosphoribosylglycinamide formyltransferase%2C phosphoribosylglycinamide synthetase%2C phosphoribosylaminoimidazole synthetase%2C transcript variant 3		GGCCCAAAAGAAAAACTGCTAAAAGACAAAAAAGACCTCACCCTTACTTCATCTATTTTT	NM_001136005
CUST_136838_PI430048170	7.18e-07	9.86e-10	-1.8862	mRNA	NM_004686	RefSeq	17296796	17413531	MTMR7	myotubularin related protein 7		GGGTTGTAACAAGGTTATCCAATGAATGGTATAGAATGAAACTGGGATAGTTCAACTTTA	NM_004686
CUST_127804_PI430048170	7.27e-07	1.03e-09	-1.10031	mRNA	NM_001199579	RefSeq	38734713	38756019	SUN2	Sad1 and UNC84 domain containing 2%2C transcript variant 1		TTTATGCCTATGCAAAAAATAAATGACGCCCAAGAGCTGTGGGATGTGGCTTTCAAAAAA	NM_001199579
CUST_132051_PI430048170	7.27e-07	1.04e-09	-2.13041	mRNA	NM_144650	RefSeq	66432482	66468809	ADHFE1	alcohol dehydrogenase%2C iron containing%2C 1		TGTCCCAAACCCCACACAGAATACTCTGCCTCTGTTTCATGTAGCAAATGAGCAAAAACT	NM_144650
CUST_130000_PI430048170	7.27e-07	1.05e-09	-6.29696	mRNA	NM_006741	RefSeq	54579239	54588659	PPP1R1A	protein phosphatase 1%2C regulatory (inhibitor) subunit 1A		GTGTATGTATGTGAAGATGCTTGGTCAACTTGTACCCAGTGAACACACACAGTCAGGAAA	NM_006741
CUST_139175_PI430048170	7.27e-07	1.06e-09	-4.58585	mRNA	NM_152794	RefSeq	46303598	46343433	HIF3A	hypoxia inducible factor 3%2C alpha subunit%2C transcript variant 1		CTGAAACTCACCAATCTCTATACACCATAAAGACCTCACCTTGGTAGGCACCAGAAAAAA	NM_152794
CUST_58757_PI430048170	7.27e-07	1.07e-09	-2.99914	ncRNA	lnc-SLCO1C1-3:1	lncipedia	20370124	20557224			+	CAAGATTTTGTCTCTAAATTAACTCTCTTCATCTGAGGGAAACAGAAAGATGAAAGGACC		lnc-SLCO1C1-3:1
CUST_128007_PI430048170	7.27e-07	1.07e-09	1.27569	mRNA	NM_001278636	RefSeq	49660675	49691487	EBPL	emopamil binding protein-like%2C transcript variant 2		AAGGCGACCAGTTTTCGTTGTATTGTTGTTCAATTAAATGGTGATATAGGGAAAAGAGAA	NM_001278636
CUST_73748_PI430048170	7.27e-07	1.08e-09	-4.73022	ncRNA	NR_027622	RefSeq	169943983	169966734	LOC100128164	four and a half LIM domains 1 pseudogene%2C transcript variant 1	+	TAATACTGTGTGGATTGCTACAAGAACTTTGTGGCCAAGAAGTGTGCTGGATGCAAGCAC	NR_027622
CUST_134850_PI430048170	7.27e-07	1.09e-09	2.00055	mRNA	NM_024518	RefSeq	150064606	150069066	ULBP3	UL16 binding protein 3		TTTTCTCTCCTATGACTGTGGCAGTGACAAGGTCTTATCTATGGGTCACCTAGAAGAGCA	NM_024518
CUST_132086_PI430048170	7.52e-07	1.14e-09	1.94706	mRNA	NM_144584	RefSeq	108648287	108661526	HENMT1	HEN1 methyltransferase homolog 1 (Arabidopsis)%2C transcript variant 1		GGTGCTTTCCTTTGATTTTGGACTTTTTTGTTTTCTCAAGAATAAAGAAGTTGGATGTGG	NM_144584
CUST_130926_PI430048170	7.65e-07	1.17e-09	-3.43988	mRNA	NM_001271946	RefSeq	168661732	169301129	SLIT3	slit homolog 3 (Drosophila)%2C transcript variant 1		TGAGTCACAGAGGAGCTATCAGATGCTCTCATGACTACCATAACTCAGCCCTGCAAAAAA	NM_001271946
CUST_29958_PI430048170	7.74e-07	1.19e-09	-2.57193	ncRNA	NR_038310	RefSeq	7015817	7019654	MIR497HG	mir-497-195 cluster host gene	-	CTAAAAAACTAGTGACAAAGTAGGGAAGCAGCTGAGCTGGAAAGGAGTTCTGAGGACGAT	NR_038310
CUST_17532_PI430048170	7.8e-07	1.21e-09	-2.74021	ncRNA	ENST00000514092	ENSEMBL_GENCODE	88889445	89465982	MEF2C-AS1		-	CCATGTTCTCTAAACATGAATATGCCTTTGGGGGAAGACAGAAGAACATGGAAGCCATGT		ENST00000514092
CUST_127111_PI430048170	8.33e-07	1.31e-09	-3.01432	mRNA	NM_000530	RefSeq	161304734	161309972	MPZ	myelin protein zero		GGGGATTCTTAGGATTTTTCTACATTCTGTATATTTCTTCTCAAACCTCCAAATGTCCTT	NM_000530
CUST_16262_PI430048170	8.65e-07	1.37e-09	-2.18445	ncRNA	ENST00000564854	ENSEMBL_GENCODE	86012296	86013874	RP13-514E23.1		-	CTGGTAAAAGAAACTTGTAGTGTGGTCTGATTGTGCCAGGGAATAAATAAGAAATAAGGA		ENST00000564854
CUST_136573_PI430048170	8.83e-07	1.42e-09	-4.00036	mRNA	NM_139072	RefSeq	229357628	229714570	DNER	delta/notch-like EGF repeat containing		AGGCCTCAAAAACATACGTAACGAAAAGGCCTAGCGAGGCAAATTCTGATTGATTTGAAT	NM_139072
CUST_136951_PI430048170	9.14e-07	1.49e-09	-2.34049	mRNA	NM_207348	RefSeq	15736313	15741392	SLC25A34	solute carrier family 25%2C member 34		CAGGAACACCTGCTACTGCACACTCCAAACCAATAAAGTTTTATATTTTGTTTACTTCAA	NM_207348
CUST_86560_PI430048170	9.14e-07	1.49e-09	-2.43439	mRNA	NM_002374	RefSeq	209579678	209734110	MAP2	microtubule-associated protein 2%2C transcript variant 1		GCACCAGAAAATAGAAGAAAGGTGTGTGGAGACTTAGGGTATTTTATTACATGTTTTCAT	NM_002374
CUST_137894_PI430048170	9.17e-07	1.51e-09	1.67307	mRNA	NM_001288747	RefSeq	154762741	154777689	DKC1	dyskeratosis congenita 1%2C dyskerin%2C transcript variant 3		GTTTTTTATGTATTCCTGTTGGGTTTTCTTGTTGATCTCATGCTAGCAGAGCAAAAATTG	NM_001288747
CUST_118741_PI430048170	9.17e-07	1.53e-09	-4.02509	ncRNA	NR_038426	RefSeq	234527890	234531779	LINC01354	long intergenic non-protein coding RNA 1354		CTACACTACGGATTTCTTAGGATAATTTTGCCCTTACTTAAAAGAAACTGACAGATGTAC	NR_038426
CUST_20036_PI430048170	2.67e-08	6.11e-12	3.63606	ncRNA	ENST00000419422	ENSEMBL_GENCODE	101308346	101310985	RP11-132A1.4			CTCAATTCAAATATTTAATGGGTTGTACTCTGGCCATTCAGGTGAACAAAATCTGCTGGG		ENST00000419422
CUST_130540_PI430048170	9.98e-07	1.7e-09	-4.15346	mRNA	NM_021963	RefSeq	73212300	73214874	NAP1L2	nucleosome assembly protein 1-like 2		CGGTGAAGTGTTAGTCACAGTATTTTCAAAAGTTTGCACATATTGTTCTGTGTAATTGTG	NM_021963
CUST_144028_PI430048170	9.98e-07	1.71e-09	-2.91873	mRNA	NM_001278717	RefSeq	35138992	35143055	FXYD1	FXYD domain containing ion transport regulator 1%2C transcript variant c		TTCATCCTGGGCATCCTCATCGTGCTGAGCAGAAGATGCCGGTGCAAGTTCAACCAGCAG	NM_001278717
CUST_134892_PI430048170	9.98e-07	1.72e-09	-2.12815	mRNA	NM_052847	RefSeq	2511219	2702748	GNG7	guanine nucleotide binding protein (G protein)%2C gamma 7		TATTGTGTGGAGTTGTCGATACCACGTGAATTCATACACAATAAAAAGCCTCACTCTCCC	NM_052847
CUST_112666_PI430048170	1.02e-06	1.78e-09	-3.78635	mRNA	NM_003178	RefSeq	12004359	12185732	SYN2	synapsin II%2C transcript variant IIb		GTTATCAGTGTGTACATCTGGTGCTTTTCATGTGTCATTTGTGAGCCACAAATGCAAAGT	NM_003178
CUST_128169_PI430048170	1.04e-06	1.83e-09	1.58692	mRNA	NM_020158	RefSeq	41386370	41397351	EXOSC5	exosome component 5		CCCAGCAAGGATAACATTCAAAGGAGCTCACATTTATGGAATGGATGAATCAATAAATTA	NM_020158
CUST_135807_PI430048170	1.04e-06	1.84e-09	1.35398	mRNA	NM_001755	RefSeq	67029146	67101055	CBFB	core-binding factor%2C beta subunit%2C transcript variant 2		CCACCATTGGCCATACTGTGTGTTTGTTTGTTTAATTTACTTTCACAATAAACTTCTGTG	NM_001755
CUST_119605_PI430048170	1.04e-06	1.85e-09	-1.68806	mRNA	NM_001843	RefSeq	40692441	41072411	CNTN1	contactin 1%2C transcript variant 1		TGTTTGCAGCGGAAGTGGGAAACCTGTAGGGTATGGTCCAGCTGTGCCGCACCGAGGCGA	NM_001843
CUST_120596_PI430048170	1.07e-06	1.93e-09	-2.10138	ncRNA	lnc-MRPL46.1-9:1	lncipedia	87859752	87862356				ACCTGTATCCTCCTGACATAGTTTATGTAGGGTCTCTTCTCAAATAAAGTATAAAACAAC		lnc-MRPL46.1-9:1
CUST_136705_PI430048170	1.07e-06	1.94e-09	1.129	mRNA	NM_001291978	RefSeq	2937936	2963506	NOP14	NOP14 nucleolar protein%2C transcript variant 1		GTGTAATTTCTGTCAACCACGGACGTTTGCCTTCATGTGTAGAATTTACTGTTGTTATGC	NM_001291978
CUST_110351_PI430048170	0.00128	7.87e-05	3.62011	ncRNA	NR_015379	RefSeq	15828946	15836321	UCA1	urothelial cancer associated 1 (non-protein coding)	-	TCTGCAATCAGAACTATTGAACTTCTCCATTCAGACCGCCACTCACACCTATGGGAAAAG	NR_015379
CUST_138053_PI430048170	1.19e-06	2.21e-09	-1.64508	mRNA	NM_020794	RefSeq	69760174	70123488	LRRC7	leucine rich repeat containing 7		GAATGATGTCACCAGAGCTCTGAGAATAATATTTGTAAGTTAACTGTTTTATGGGGACAT	NM_020794
CUST_82297_PI430048170	1.25e-06	2.33e-09	1.5313	mRNA	NM_001288747	RefSeq	154762741	154777689	DKC1	dyskeratosis congenita 1%2C dyskerin%2C transcript variant 3		TGCTACCTCTTTTTCAGTGAGTCTGCCAAAAAAGAGGTGGTTGCTGAAGTGGTAAAAGCC	NM_001288747
CUST_141388_PI430048170	1.3e-06	2.44e-09	1.78321	mRNA	NM_006809	RefSeq	44942129	44960473	TOMM34	translocase of outer mitochondrial membrane 34		TTTCAGCTTTGCACCTGGAACTCTGTAGTAATAATAAAAGTTATTGCTTATTGGGCATTC	NM_006809
CUST_140303_PI430048170	1.32e-06	2.51e-09	4.34945	mRNA	NM_001193434	RefSeq	113751453	113782433	PLEKHS1	pleckstrin homology domain containing%2C family S member 1%2C transcript variant 2		CAGCACTTAGAAGAGACATTCAAATACATTTCATTTCCTGTTACCCAGATTGTTCGGAAA	NM_001193434
CUST_138125_PI430048170	1.32e-06	2.55e-09	1.81217	mRNA	NM_002703	RefSeq	56393362	56435636	PPAT	phosphoribosyl pyrophosphate amidotransferase		CTGCAGAGATGAAAAATGTGTTTTCACGGGATTTATATTGTGAACTAAACTAAGCCTACT	NM_002703
CUST_134326_PI430048170	1.32e-06	2.57e-09	2.01762	mRNA	NM_019042	RefSeq	105456510	105522238	PUS7	pseudouridylate synthase 7 (putative)		GTCTGGCATTGCATAAACTTCTCTGGTGTGAAAGGATAAATATGCCTTTCTAAAGTTGTA	NM_019042
CUST_92499_PI430048170	0.000222	7.03e-06	3.62006	ncRNA	lnc-GEN1-1:1	lncipedia	17540706	17567707			+	TGTTGAGTTTTATCATTTTCGTTAAGTGACCGTGCGCAGCGCTGTAACTGACTTACTGGA		lnc-GEN1-1:1
CUST_127420_PI430048170	1.32e-06	2.6e-09	-3.91657	mRNA	NM_001836	RefSeq	24505354	24508265	CMA1	chymase 1%2C mast cell		TTTGACCACAATCTTCAGCTGTGTGTGGGCAATCCCAGGAAGACAAAATCTGCATTTAAG	NM_001836
CUST_60218_PI430048170	1.38e-05	9.73e-08	3.57425	ncRNA	lnc-RNASEH2B-3:8	lncipedia	50415088	50533860				GATGGTGGAACTGACACTGGGACAGAACACAGAAAACAGAATCTAATGCTATTGCTCTGG		lnc-RNASEH2B-3:8
CUST_142712_PI430048170	1.32e-06	2.63e-09	-4.91772	mRNA	NM_001036	RefSeq	33310961	33866103	RYR3	ryanodine receptor 3%2C transcript variant 1		GAATCTCCTCAAATACAATGAAGTGCCCACTGCAATAAAGTAATACGTACCAATACAAAA	NM_001036
CUST_27833_PI430048170	3.93e-05	4.91e-07	3.54025	ncRNA	ENST00000611946	ENSEMBL_GENCODE	44778196	44778721	CTD-2008A1.3			GCCCTGAATTCAGCAGTGTCTGATTTTATTACTCAATTGTAGCTTTCAGTTTATTTGTGT		ENST00000611946
CUST_128612_PI430048170	1.38e-06	2.78e-09	1.59919	mRNA	NM_032346	RefSeq	34404397	34426167	PDCD2L	programmed cell death 2-like		CAAGAGTGCTAATTTAGGTCTTTCTGTGGAATTTGGAACAATTCTAGTTTACACATGTGA	NM_032346
CUST_107270_PI430048170	0.000668	3.2e-05	3.51333	ncRNA	lnc-WDR31-2:1	lncipedia	113302100	113303376				GACGTGTAGTAATACAAGCTTACTGGATGGAGTAAAGTTAGAATTTTCAGGTAAGAGAAT		lnc-WDR31-2:1
CUST_145547_PI430048170	1.42e-06	2.9e-09	-3.85054	mRNA	NM_003278	RefSeq	45026266	45036071	CLEC3B	C-type lectin domain family 3%2C member B		ATGCCAAGAAAGATGTTGTGAACACAAAGATGTTTGAGGAGCTCAAGAGCCGTCTGGACA	NM_003278
CUST_144827_PI430048170	1.46e-06	3.04e-09	4.60254	mRNA	NM_080629	RefSeq	102876466	103108496	COL11A1	collagen%2C type XI%2C alpha 1%2C transcript variant B		TGTCCTTTTAAGAAGGGAGATATGAATCCAATAAATAAACTCAAGTCTTGGCTACCTGGA	NM_080629
CUST_142995_PI430048170	1.46e-06	3.06e-09	-3.6631	mRNA	NM_001099640	RefSeq	55719626	55732121	TMEM100	transmembrane protein 100%2C transcript variant 1		GTTCTCAATTGTATTTCTCTCAAATGGACAGGTTCCTTCTTTACTGGAGGATTTTTGTTT	NM_001099640
CUST_135709_PI430048170	1.46e-06	3.08e-09	-0.918939	mRNA	NM_001277961	RefSeq	3855702	4093210	STIM1	stromal interaction molecule 1%2C transcript variant 1		CCTGGACACCCTCAAATGGGGTTTTCTGTGTTATTTCATAAAATTCTTTGAAGTCCAATA	NM_001277961
CUST_138852_PI430048170	1.46e-06	3.09e-09	-2.17192	mRNA	NM_001142784	RefSeq	34652184	34661901	IL11RA	interleukin 11 receptor%2C alpha%2C transcript variant 3		GGGGTTGTGCAGGTGTGAATAAAGAGAATAAGGAAGTTCTTGGAGATTATACTCAGAAAA	NM_001142784
CUST_7623_PI430048170	0.00193	0.000136	3.47412	ncRNA	NR_024342	RefSeq	77954906	77955026	SNAR-H	small ILF3/NF90-associated RNA H		GGAGGCGAGGGTGCGAGGGTACGAGTTTGAGGCCAACCTGGTCCACATTGGTTGAAAAAA	NR_024342
CUST_142934_PI430048170	1.47e-06	3.14e-09	4.22644	mRNA	NM_007036	RefSeq	54977866	54985586	ESM1	endothelial cell-specific molecule 1%2C transcript variant 1		CAGAGGGTCCTTATTTAAACATAAGTGCTGTGACTTAGGTGAATTTTCAATTTAAGGTAG	NM_007036
CUST_142518_PI430048170	1.49e-06	3.21e-09	3.30339	mRNA	NM_001195243	RefSeq	129502478	129512932	SMKR1	small lysine-rich protein 1		TCATTTAGAGAAGACACGGCAAGAAACACTGGGTTTCCTTAGGAACATTCCTCTCTTGGG	NM_001195243
CUST_21824_PI430048170	1.5e-06	3.25e-09	-6.12849	ncRNA	NR_121189	RefSeq	72689	75294	PGM5P3-AS1	PGM5P3 antisense RNA 1%2C transcript variant 2		CAGTTGAAACCTGCTGGGACTTTTTAGCCATTCTCTTCAACATAAAGAATGGGTGTTTTT	NR_121189
CUST_73512_PI430048170	1.5e-06	3.26e-09	-2.97477	mRNA	NM_130808	RefSeq	131533559	132035442	CPNE4	copine IV%2C transcript variant 3		TATCTGCTATAGGATGAGAGACTTTTTAAAATGGCAGATGCATGGACTGTATTTTGCATG	NM_130808
CUST_142594_PI430048170	1.52e-06	3.33e-09	-2.37509	mRNA	NM_005822	RefSeq	46220729	46325892	RCAN2	regulator of calcineurin 2%2C transcript variant 1		TGTGCACGTGTATAGCTCAAAGAGCTTAGACTTCAAATATATCTGGTGAATGACTCTTTG	NM_005822
CUST_69980_PI430048170	1.74e-06	3.86e-09	-6.29083	ncRNA	NR_121192	RefSeq	68355163	68357866	PGM5-AS1	PGM5 antisense RNA 1%2C transcript variant 2	+	TTGAAACCTGCTGGGACTTTTTAGCCATTCTCTTCAACATAAAGAATGGGTGTTTTTGGA	NR_121192
CUST_133721_PI430048170	1.74e-06	3.87e-09	-3.37117	mRNA	NM_001039966	RefSeq	1086806	1093815	GPER1	G protein-coupled estrogen receptor 1%2C transcript variant 3		ATGAGGCTGGTGACGTTCAGCCTTTGTCAATAAACCTGTCATGTGCGGATCCTTAAAAAA	NM_001039966
CUST_113494_PI430048170	1.78e-06	3.99e-09	-4.43642	ncRNA	lnc-MID1-4:1	lncipedia	11637761	11638204			-	GGAGAAATTCATCACGATTTATTACCTGAACATTTGTGAAACCAATTTGAGAGAATCCCA		lnc-MID1-4:1
CUST_105903_PI430048170	1.78e-06	4.02e-09	-5.11976	mRNA	NM_001099772	RefSeq	46798997	46819349	CYP4B1	cytochrome P450%2C family 4%2C subfamily B%2C polypeptide 1%2C transcript variant 1		GACTCCTAGAGGACAGTGCTATGTAAAAATGTGTGTCTATAAATGTTTATCATGCATGTA	NM_001099772
CUST_128358_PI430048170	1.89e-06	4.31e-09	5.65032	mRNA	NM_021101	RefSeq	190305700	190322446	CLDN1	claudin 1		CACACCTGGAAACAGACCAATAGACATTTTGGGGTTTTATAATAGGAATTTGTATAAAGC	NM_021101
CUST_90652_PI430048170	1.97e-06	4.5e-09	0.834385	mRNA	NM_001130089	RefSeq	75627723	75647687	KARS	lysyl-tRNA synthetase%2C transcript variant 1		GCACTTCTGTCTAGAAAATAATAATTGCAAGTTGTATAACTCAGGCGTCTTTGCATTTCT	NM_001130089
CUST_123662_PI430048170	0.000136	3.4e-06	3.42047	ncRNA	ENST00000517927	ENSEMBL_GENCODE	160468268	160487426	MIR146A		+	GCTTTACCAAAACTTGGTTTATGTAAGTGGAAAAAGCATGTTGCAAAATAACTTGGTGTC		ENST00000517927
CUST_79928_PI430048170	2.02e-06	4.68e-09	-2.58752	ncRNA	lnc-RRS1-1:3	lncipedia	66439267	66444681			+	GTTGAACCTAACTTATAGGTTTTCTTGTAGGACCTAAAAAACATGGGTGCTAAAAATGTG		lnc-RRS1-1:3
CUST_138348_PI430048170	2.18e-06	5.13e-09	-1.3212	mRNA	NM_001287174	RefSeq	17392884	17476845	ABCC8	ATP-binding cassette%2C sub-family C (CFTR/MRP)%2C member 8%2C transcript variant 1		CCCATACCCCTGCCTGGGTTTTCTAACTGTAAATCACTTGTAAATAAATAGATTTGATTA	NM_001287174
CUST_133102_PI430048170	2.18e-06	5.14e-09	-2.4676	mRNA	NM_003087	RefSeq	86958530	86963260	SNCG	synuclein%2C gamma (breast cancer-specific protein 1)		CAAGACCAAGGAGAATGTTGTACAGAGCGTGACCTCAGTGGCCGAGAAGACCAAGGAGCA	NM_003087
CUST_95452_PI430048170	2.18e-06	5.18e-09	1.02765	mRNA	NM_001762	RefSeq	56051684	56063989	CCT6A	chaperonin containing TCP1%2C subunit 6A (zeta 1)%2C transcript variant 1		AGACTGCAAAGTGATCCTGAGGATTACAGCTGTGGAATTTTTGTCCAAGCTTCAAATAAT	NM_001762
CUST_76304_PI430048170	0.00252	0.000197	3.4187	ncRNA	ENST00000507361	ENSEMBL_GENCODE	174336354	174528715	LINC01411		-	ATTCATCACTGGAGAGAACACAGTGGAATGGCTTCAGCGAAAACTCACTCTGAAGGTCTT		ENST00000507361
CUST_137051_PI430048170	2.18e-06	5.22e-09	-3.37928	mRNA	NM_004522	RefSeq	3213	96131	KIF5C	kinesin family member 5C%2C transcript variant 1		GATGTATGGGTACTCTGGCAGACTGCATGTTGTATAATTTGAAAAATACTAAAAGTGGAA	NM_004522
CUST_128809_PI430048170	2.23e-06	5.41e-09	-5.96326	mRNA	NM_000587	RefSeq	40909496	40982941	C7	complement component 7		CTCTTTCATCAAAACAAAACAGCAGCTGTGGGAGGAGAAATGAGAGGGCTTAAATGAAAT	NM_000587
CUST_136043_PI430048170	2.23e-06	5.42e-09	1.35244	mRNA	NM_004341	RefSeq	27217389	27243792	CAD	carbamoyl-phosphate synthetase 2%2C aspartate transcarbamylase%2C and dihydroorotase		ACCTTAAACCTGTACAGTCATTTTTCTACTGACTTAATAAACAGCCGAGCTGTCCCTTGA	NM_004341
CUST_119260_PI430048170	2.29e-06	5.58e-09	1.15451	mRNA	NM_170746	RefSeq	57741249	57743411	C11orf31	chromosome 11 open reading frame 31		GAGAGAGGTTTCCGCTGTAGGAGCAGAGCTTCCGGGCTGCGCTCTTCGTTGCCCAGTTTC	NM_170746
CUST_134531_PI430048170	2.32e-06	5.69e-09	4.42071	mRNA	NM_014427	RefSeq	89575767	89597246	CPNE7	copine VII%2C transcript variant 2		TGTGGGTTCTGCCGGTGGGGCTTCAGGAGTAATAAAGTGTCACCCTATCCTTGTAAAAAA	NM_014427
CUST_118329_PI430048170	2.32e-06	5.73e-09	-4.24431	mRNA	NM_006252	RefSeq	56645316	56715335	PRKAA2	protein kinase%2C AMP-activated%2C alpha 2 catalytic subunit		GTAACAAACACAAAGGAGAAAAGCAGCCTGTCTGATTGCTTATAAGCTTTTTTCACAAAA	NM_006252
CUST_67423_PI430048170	2.35e-06	5.87e-09	1.35133	mRNA	NM_001145526	RefSeq	78187316	78207701	AFMID	arylformamidase%2C transcript variant 1		TATCTTGAAAACAATCTTCCAGTAGTTCTGACGATACTTGGAGCCTGGTCCACGTGCATC	NM_001145526
CUST_117184_PI430048170	2.35e-06	5.95e-09	0.959504	ncRNA	NR_045207	RefSeq	74361551	74362041	LOC729739	peptidylprolyl isomerase A (cyclophilin A) pseudogene	-	CTTGTCCATGGCAAATGCTGGATCCAATACAAACGGTTCCCAGTTTTTCATCTGCACTGA	NR_045207
CUST_124944_PI430048170	0.000103	2.21e-06	3.41695	ncRNA	lnc-GLI3-4:1	lncipedia	41685114	41687045			-	TATTCAGCAACGCCTGATAGCTTCTTTGGCCTTATGTTAAATAAAAAGACCTGTTTGGGA		lnc-GLI3-4:1
CUST_140423_PI430048170	2.35e-06	5.96e-09	1.95487	mRNA	NM_016458	RefSeq	144137768	144140843	HGH1	HGH1 homolog (S. cerevisiae)		AGCACTCAGACATCAGCACTGTCTTCACAGAATAAATGCTTTATCTGGCCTTGCAAAAAA	NM_016458
CUST_135477_PI430048170	2.4e-06	6.1e-09	0.892301	mRNA	NM_018231	RefSeq	58665108	58684777	SLC38A7	solute carrier family 38%2C member 7		TTCTACTTGTGTATACTCGAGAAAGGGAAGATGGTTAATAAAAGGGATTTGTGCTGCTGA	NM_018231
CUST_75842_PI430048170	2.41e-06	6.17e-09	-1.57923	mRNA	NM_014819	RefSeq	109334708	109409974	PJA2	praja ring finger 2%2C E3 ubiquitin protein ligase		TTCTTCTTTACCCAGTGAACCTATATTTGAAAAAAGTGAAACAGAAATTCCCACTTGTGG	NM_014819
CUST_138708_PI430048170	2.44e-06	6.3e-09	-6.21982	mRNA	NM_002976	RefSeq	166403572	166486971	SCN7A	sodium channel%2C voltage gated%2C type VII alpha subunit%2C transcript variant 1		AGCTCCGTTTTCTATTTCTTGGGAATGCTTTATTGTGGAAACTGCTTCAGATACTTAAAT	NM_002976
CUST_107439_PI430048170	2.5e-06	6.5e-09	-5.09893	ncRNA	lnc-FOXD4L1-4:5	lncipedia	113548584	113572296				TAACTTCAAGATTGGACGACTGATTATTGGACAGAATGGCATCTTGTCGACACCTGCGGT		lnc-FOXD4L1-4:5
CUST_105841_PI430048170	2.51e-06	6.55e-09	-4.85654	ncRNA	lnc-FAM47A-3:3	lncipedia	32849727	33129077			-	TTCTGAACAGTTTTGGGAAGCAGCATATTGAGAACCTCTTCAGTGACCTACAGGATGGGA		lnc-FAM47A-3:3
CUST_5123_PI430048170	0.000916	4.95e-05	3.41316	ncRNA	NR_024220	RefSeq	47913050	47913170	SNAR-C1	small ILF3/NF90-associated RNA C1		AGAGGCGAGGGTTCGAGGGCTCGAGTTCGAGGCCAACCTGGTCCACATGGGTTGAAAAAA	NR_024220
CUST_137741_PI430048170	2.54e-06	6.72e-09	-1.30543	mRNA	NM_007351	RefSeq	89894900	89954629	MMRN1	multimerin 1		TTCTATGGTAGTACCTACAGATCTGCCCTTCTTCTTCTAAAGGGTAAGTCATAATCTGTG	NM_007351
CUST_59158_PI430048170	2.54e-06	6.75e-09	1.15687	mRNA	NM_000075	RefSeq	57747726	57752447	CDK4	cyclin-dependent kinase 4		AAGAAAAGCTGCCATTTCCCTTCTGGACACTGAGAGGGCAATCTTTGCCTTTATCTCTGA	NM_000075
CUST_125360_PI430048170	2.56e-06	6.85e-09	-3.51845	mRNA	NM_001831	RefSeq	27596916	27614811	CLU	clusterin%2C transcript variant 1		TTCCTGAACCAGAGCTCGCCCTTCTACTTCTGGATGAATGGTGACCGCATCGACTCCCTG	NM_001831
CUST_7624_PI430048170	0.00076	3.83e-05	3.41191	ncRNA	NR_024258	RefSeq	46830584	46830704	SNAR-E	small ILF3/NF90-associated RNA E		GGAGGCGAGGGTTCGAGGGCACGAGTTCGAGGCCAACCTGGTCCACATGGGTTGAAAAAA	NR_024258
CUST_95858_PI430048170	2.6e-06	7.03e-09	-3.59894	ncRNA	lnc-PON2-3:1	lncipedia	95587483	95589717			-	TTAATGTGTGGCTTTGATGACTTGTTTGTTTGTTTTAGATTTCAGACAGAGGAGGTGGTG		lnc-PON2-3:1
CUST_100198_PI430048170	2.77e-06	7.53e-09	-2.47466	ncRNA	lnc-SEMA3A-2:1	lncipedia	85041077	85055765			-	GTCAATACGGCACTAATTTGGGGGTAGCTATTTTCTTATTGTTACCAAATAGGTAAATGA		lnc-SEMA3A-2:1
CUST_32499_PI430048170	2.87e-06	7.84e-09	-5.55839	ncRNA	ENST00000587767	ENSEMBL_GENCODE	35754566	35755490	AC002398.12		-	AAATGTAGTACCCGGATGTCTTTGTAGAGGACTCAGAAGGAAGTAGAGGAGGGGTCTTAA		ENST00000587767
CUST_118379_PI430048170	2.87e-06	7.95e-09	-3.02801	mRNA	NM_024686	RefSeq	83869373	83999150	TTLL7	tubulin tyrosine ligase-like family member 7		TTATGATAGTAGCAGCAGCTCTTCAGAATCTGACGAAAATGAAAAAGAAGAGTACCAAAA	NM_024686
CUST_112218_PI430048170	2.87e-06	7.96e-09	-5.22559	mRNA	NM_004010	RefSeq	31119227	33128427	DMD	dystrophin%2C transcript variant Dp427p2		CCCGAGCAGAAGAGTGGTTAAATCTTTTGTTGAATACCAGAAACACATGGAAACTTTTGA	NM_004010
CUST_69978_PI430048170	1.49e-05	1.09e-07	3.39434	ncRNA	NR_120364	RefSeq	127187785	127197627	CASC19	cancer susceptibility candidate 19 (non-protein coding)		CAGAGGAGGAAGGCAGCACAATGATGGAAGGCTTCCTAAAGAGATAACACTAACAAAGTT	NR_120364
CUST_352_PI430048170	2.95e-06	8.28e-09	-1.07657	mRNA	NM_001199771	RefSeq	55720366	55724742	RDH5	retinol dehydrogenase 5 (11-cis/9-cis)%2C transcript variant 1		GGGCAGAAATGTGCCCAGTGGAAGGCTGACCCCATTTAAGTGCCAACTACTCCAAACCGA	NM_001199771
CUST_134544_PI430048170	2.95e-06	8.3e-09	-2.46657	mRNA	NM_001256717	RefSeq	83552885	83709408	SNAP91	synaptosomal-associated protein%2C 91kDa%2C transcript variant 6		CCCAGTGCATGTACGCCCTCTGAGATGCAATAAACACCTTGAACAAAGAAATGCAAAAAA	NM_001256717
CUST_125385_PI430048170	0.00668	0.00073	3.39172	ncRNA	ENST00000519691	ENSEMBL_GENCODE	37597480	37599858	RP11-150O12.3			GATTCACAGAACAAATGCATGCAAACCTTGCTATCAATAAATTACACATGCACTTACGTA		ENST00000519691
CUST_136046_PI430048170	3.04e-06	8.65e-09	-5.40121	mRNA	NM_031850	RefSeq	148697870	148743003	AGTR1	angiotensin II receptor%2C type 1%2C transcript variant 4		CTGGTCCCAAGTAGTAGTGTCTTCCTAGTATATTAGTTTGATTTAATATCTGAGAAGTGT	NM_031850
CUST_138314_PI430048170	3.04e-06	8.68e-09	-3.97133	mRNA	NM_001148	RefSeq	113049628	113383740	ANK2	ankyrin 2%2C neuronal%2C transcript variant 1		GCATCTTGTTCCCATGGTGATAACACTAATTGAATATATCTATGAGGGCATGTATTAGTT	NM_001148
CUST_105411_PI430048170	2.71e-05	2.77e-07	3.38821	ncRNA	lnc-DCLRE1A-1:1	lncipedia	113780621	113782478			+	ACTTTGGCATTTTGAGGGACACATACAGGATGCAGCATGGAATGTCTCTGAATTTGGGAT		lnc-DCLRE1A-1:1
CUST_126474_PI430048170	3.1e-06	8.95e-09	-2.46997	ncRNA	NR_038310	RefSeq	7015817	7019654	MIR497HG	mir-497-195 cluster host gene	-	ATTCTAAAAAACTAGTGACAAAGTAGGGAAGCAGCTGAGCTGGAAAGGAGTTCTGAGGAC	NR_038310
CUST_139910_PI430048170	3.1e-06	9e-09	-5.09068	mRNA	NM_001201	RefSeq	81030964	81057531	BMP3	bone morphogenetic protein 3		GGGTATATTGCAGTGAAACTGTGAAGGATACTTCACTACCAATGTATAAGCTTTGTTGAA	NM_001201
CUST_130349_PI430048170	3.13e-06	9.12e-09	1.74052	mRNA	NM_000029	RefSeq	230702522	230714590	AGT	angiotensinogen (serpin peptidase inhibitor%2C clade A%2C member 8)		ATAGCTGGTTATTTCTCCCTTGTGTTAGTAATAAACGTCTTGCCACAATAAGCCTCCAAA	NM_000029
CUST_25879_PI430048170	0.0123	0.00167	3.38769	ncRNA	ENST00000567788	ENSEMBL_GENCODE	130033454	130045057	RP11-474D1.3			TATCTGAATTTTAGCAAGCGAGAGAATGCATTTAGGACAAGCAACAGCGATGGCTCCCGT		ENST00000567788
CUST_137535_PI430048170	3.14e-06	9.25e-09	1.60731	mRNA	NM_032494	RefSeq	112215862	112255087	ZC3H8	zinc finger CCCH-type containing 8		GTAGCAATGTACAGATAAAGAGTACTTTAACGCCCATGCGTGTTCAAGACTGTTCAAGAC	NM_032494
CUST_36969_PI430048170	3.15e-06	9.36e-09	-2.06482	ncRNA	ENST00000362224	ENSEMBL_GENCODE	71376933	71377045	MIR30C2		-	AAGAAAGCTGGGAGAAGGCTGTTTACTCTTTCTGCCTTGGAAGTCAACTAAAGAGAAATG		ENST00000362224
CUST_131664_PI430048170	3.15e-06	9.37e-09	-2.59079	mRNA	NM_032596	RefSeq	34379019	34397851	C9orf24	chromosome 9 open reading frame 24%2C transcript variant 1		ACTATGTTATCCATCCTGAGTTTGTGTCTGAGACCTATCCCGACTATCGTTGCTGGTAGA	NM_032596
CUST_141492_PI430048170	3.19e-06	9.53e-09	2.07434	mRNA	NM_004292	RefSeq	66332070	66336529	RIN1	Ras and Rab interactor 1		ACATCTGAGGAACTGGAATAAAGATGAGGGGGCTTCGGGGGCCCCCAGACTGTGAAAAAA	NM_004292
CUST_131354_PI430048170	3.21e-06	9.65e-09	1.15021	mRNA	NM_001243249	RefSeq	85804	138698	NPRL3	nitrogen permease regulator-like 3 (S. cerevisiae)%2C transcript variant 5		GAGGAGCTCTGGCTAAGGCACAGTTTTCTAGAAATAAAACATTTATTCGGTTTTTAAACA	NM_001243249
CUST_45195_PI430048170	1.33e-06	2.66e-09	3.35977	ncRNA	lnc-TMEM75-3:5	lncipedia	127077558	127294792				GTTACTATGGGTTATCACTTGGATTTGAAGAACCATCATTTCTAGGCATTGCTGCTCAGA		lnc-TMEM75-3:5
CUST_121940_PI430048170	3.26e-06	9.93e-09	-3.27586	ncRNA	NR_026597	RefSeq	217284022	217756593	DIRC3	disrupted in renal carcinoma 3		GGGGTAAGTCTTACATTTGTCATCTAGGTGATTAAGAAAGGAAAAAGTATCTGTTTCAAG	NR_026597
CUST_131239_PI430048170	3.26e-06	9.95e-09	-4.1185	mRNA	NM_002126	RefSeq	55264959	55325065	HLF	hepatic leukemia factor		CACCATGATATTGGTGGTATTTATGCTGTTAAGTCCAAACCTTTATCTGTCTGTTATTCT	NM_002126
CUST_29609_PI430048170	0.00031	1.09e-05	3.33594	ncRNA	ENST00000568776	ENSEMBL_GENCODE	80155053	80563135	RP11-525K10.3		+	CTGATGGGTGAACAGCTCTCAACATGAGATTTTTGTTGTATGCCTTAAAAAAGATTATAC		ENST00000568776
CUST_66580_PI430048170	0.00106	6.04e-05	3.33413	ncRNA	lnc-POTEC-5:2	lncipedia	15301185	15303067				AGTGAAGCAACTTGAACTCACTCTCCGAATATACAAAATATGGAATTGAAGACTGTAAGA		lnc-POTEC-5:2
CUST_122265_PI430048170	3.43e-06	1.07e-08	3.98172	mRNA	NM_005069	RefSeq	36699132	36749917	SIM2	single-minded family bHLH transcription factor 2%2C transcript variant SIM2		ATGAGATAGAGAGGTCGTTCTTTCTTCGAATGAAATGTGTCTTGGCGAAAAGGAACGCGG	NM_005069
CUST_120116_PI430048170	3.43e-06	1.07e-08	-2.52444	ncRNA	ENST00000572358	ENSEMBL_GENCODE	26592747	26594517	RP11-483C6.1		-	CTAGTGTGTTTTCGGAAACTTTCTTCAGGATGTGTAACACAGAATACAGACACACTCGGG		ENST00000572358
CUST_106947_PI430048170	3.43e-06	1.07e-08	-6.2045	mRNA	NM_001442	RefSeq	81478496	81483238	FABP4	fatty acid binding protein 4%2C adipocyte		CCTGGACTGAAGTTCGCATTGAACTCTACAACATTCTGTGGGATATATTGTTCAAAAAGA	NM_001442
CUST_134948_PI430048170	3.47e-06	1.09e-08	4.08692	mRNA	NM_005069	RefSeq	36699132	36749917	SIM2	single-minded family bHLH transcription factor 2%2C transcript variant SIM2		GGAGCAGTTCAATAACAAAGGTTACTGTTGAGAAAAAAGACCCTATCATAGATTTACAAG	NM_005069
CUST_49297_PI430048170	0.0319	0.00609	3.33283	ncRNA	lnc-PDE9A-1:1	lncipedia	42812269	42817887				TATAACTTGCAAACCAGTGGAGTGAGGAAAAGAGGAGGAGGTGCGTAAAACACAACCAAC		lnc-PDE9A-1:1
CUST_21820_PI430048170	3.5e-06	1.11e-08	-4.48495	ncRNA	NR_002836	RefSeq	41007014	41074625	PGM5P2	phosphoglucomutase 5 pseudogene 2	+	ATGCAATGCATGGAGTTATGGAACCTTATGTGAGAAAAGTTCTGTGTGATGAGCTGGGGG	NR_002836
CUST_84309_PI430048170	6.04e-05	9.53e-07	3.33194	ncRNA	NR_027067	RefSeq	38738954	38752257	LINC00114	long intergenic non-protein coding RNA 114%2C transcript variant 3		CAAGCCATAGAAATCTAATATGTTTCAGATACTATATTGGGCTGCATGAAGACTAAATCC	NR_027067
CUST_143357_PI430048170	3.58e-06	1.15e-08	1.14881	mRNA	NM_001304430	RefSeq	94574053	94596275	TGDS	TDP-glucose 4%2C6-dehydratase%2C transcript variant 2		GATGTCTTAGGCCCTAATTCACCATTTCTTTTTTAAGATCTGATATGCTATCATTGCCTT	NM_001304430
CUST_134552_PI430048170	3.58e-06	1.15e-08	1.6394	mRNA	NM_018270	RefSeq	62796452	62800593	MRGBP	MRG/MORF4L binding protein		TTTTTGTATGATCTAGTAACTTGCAAACAGACCAAATGGATGAGAGGCGGGGACCGTGCA	NM_018270
CUST_135805_PI430048170	3.68e-06	1.19e-08	-2.48428	mRNA	NM_001831	RefSeq	27596916	27614811	CLU	clusterin%2C transcript variant 1		GGGGTCAGAGGTATTTGCTTAAGTGATCATAATTGTAAAGTATATGTCACATTGTCACAT	NM_001831
CUST_130917_PI430048170	3.68e-06	1.2e-08	1.11132	mRNA	NM_001243926	RefSeq	50611861	50649297	MAPKAPK3	mitogen-activated protein kinase-activated protein kinase 3%2C transcript variant 1		CACTGCTGGGTTTTACATCCAGATAGTAATAAACACCATTTCATCATTTTCTCTTGGAAA	NM_001243926
CUST_20748_PI430048170	0.00554	0.000568	3.3219	ncRNA	ENST00000519691	ENSEMBL_GENCODE	37597480	37599858	RP11-150O12.3			CAGAACAAATGCATGCAAACCTTGCTATCAATAAATTACACATGCACTTACGTAAAACAC		ENST00000519691
CUST_5124_PI430048170	0.000827	4.31e-05	3.2784	ncRNA	NR_024221	RefSeq	47950295	47950414	SNAR-C3	small ILF3/NF90-associated RNA C3		AGAGGCGAGGGTTCGAGGGCACGAGTTCGAGGCCAACCTGGTCCACATGGGTTGAAAAAA	NR_024221
CUST_65565_PI430048170	3.79e-06	1.25e-08	1.73166	mRNA	NM_004341	RefSeq	27217389	27243792	CAD	carbamoyl-phosphate synthetase 2%2C aspartate transcarbamylase%2C and dihydroorotase		TTTGATGAGATCTCTTTTGAGGTGGTGATGGACATCTATGAGCTCGAGAACCCTGAAGGT	NM_004341
CUST_57622_PI430048170	3.79e-06	1.25e-08	-1.48611	ncRNA	lnc-ROM1-7:7	lncipedia	62516562	62525881			-	ATTAACATCTGGGACATCAATGTCCACTTTGGGGCCTTTGAGGTCAACTTCAGGACCTTT		lnc-ROM1-7:7
CUST_71805_PI430048170	1.14e-05	7.39e-08	3.27721	ncRNA	lnc-SIM2-2:1	lncipedia	36699132	36710613			+	TATTAACAGGAGCACTTGTCCAGAGCTTACTGCAAGCCACATTCAGTTCCGGACCTTATT		lnc-SIM2-2:1
CUST_66012_PI430048170	3.85e-06	1.29e-08	0.924659	ncRNA	lnc-C2orf81-2:1	lncipedia	74417718	74421728			+	GAGTTCGCCCATCCCAGCCATCACTTTTCCAACTAGTCCTTAGAGAAGGGAAGATGAGCG		lnc-C2orf81-2:1
CUST_137828_PI430048170	3.87e-06	1.3e-08	-2.29122	mRNA	NM_005288	RefSeq	26755200	26760785	GPR12	G protein-coupled receptor 12		GTTTCTATATTGATTGTATGCCTGGTATAATAAAGGAAAAGACTGCCTTATTGTCCCCTT	NM_005288
CUST_135138_PI430048170	3.87e-06	1.31e-08	1.58703	mRNA	NM_012453	RefSeq	73568945	73578683	TBL2	transducin (beta)-like 2		TGATAAGAGAGTCGGTATTGAGAAGTTTAAATTTGTGAATTTGAAGGCTGCGTGGGTGTG	NM_012453
CUST_92479_PI430048170	3.87e-06	1.31e-08	-2.32331	ncRNA	lnc-GCNT6-5:3	lncipedia	10521282	10529109			+	GAGAGCTTCAGCCATCACGAGGATGATTTCGGAACCTGGAGAAAATAAAATGCATTGAAA		lnc-GCNT6-5:3
CUST_100403_PI430048170	3.87e-06	1.32e-08	2.26507	mRNA	NM_000358	RefSeq	136028894	136063818	TGFBI	transforming growth factor%2C beta-induced%2C 68kDa		TCTCCAAGGTGACAAGCTGGAAGTCAGCTTGAAAAACAATGTGGTGAGTGTCAACAAGGA	NM_000358
CUST_127206_PI430048170	3.89e-06	1.33e-08	-3.31033	mRNA	NM_005909	RefSeq	72107290	72209570	MAP1B	microtubule-associated protein 1B		GCTTTTATGATATTTGTGTGCAATATCCCCTCTTCCATTGAGGATATTTGATGTAAAGGA	NM_005909
CUST_119261_PI430048170	3.89e-06	1.34e-08	0.886377	mRNA	NM_170746	RefSeq	57741249	57743411	C11orf31	chromosome 11 open reading frame 31		CGGGAGGAAGCGTAAGGCTGAGGCCGCGGTGGTCGCCGTAGCCGAGAAGCGAGAGAAGCT	NM_170746
CUST_113534_PI430048170	0.000105	2.29e-06	3.2387	ncRNA	lnc-C9orf16-3:1	lncipedia	128149471	128150609			+	TCCTCTGTTCCTTAGAGCAACGTTTATAGCACATTTCCATGCAGACACACAGACAGTGGT		lnc-C9orf16-3:1
CUST_49672_PI430048170	0.000162	4.37e-06	3.21626	ncRNA	lnc-RP11-262H14.4.1-2:1	lncipedia	40739366	40744413				AAGATACTTTTAAAAATCAAATTGCACTTGTAGAGATACAAGTTACAATGCTGGAGATGA		lnc-RP11-262H14.4.1-2:1
CUST_142573_PI430048170	3.95e-06	1.37e-08	-4.19553	mRNA	NM_002371	RefSeq	95025654	95053992	MAL	mal%2C T-cell differentiation protein%2C transcript variant a		GGTCCATGGTGGAAGACGATAACCCTGTGAAATACTTTATAAAATGTCTTAATGTTCAAA	NM_002371
CUST_94767_PI430048170	4.06e-06	1.42e-08	-4.05105	mRNA	NM_001201461	RefSeq	321948	343243	TTYH1	tweety family member 1%2C transcript variant 3		CTCGTGGCACTAACTTGGAAAAGGGTTGATTTAAAATAAAAGGGAAGACTATTTTACAAG	NM_001201461
CUST_136800_PI430048170	4.06e-06	1.43e-08	-2.82781	mRNA	NM_153456	RefSeq	96090838	96839562	HS6ST3	heparan sulfate 6-O-sulfotransferase 3		CTGTACAATAATATGTATGAACTCAGTTACTAGGGGACTGTATTGTGACATTATCAACCT	NM_153456
CUST_134076_PI430048170	4.13e-06	1.46e-08	-3.49116	mRNA	NM_000849	RefSeq	109733931	109741038	GSTM3	glutathione S-transferase mu 3 (brain)%2C transcript variant 1		GGGCTAGATCGATGATATGACCAGAAATCAAAAAGGGAATGCATTATTTATTGCTGTGTA	NM_000849
CUST_96116_PI430048170	0.0104	0.00132	3.20538	ncRNA	NR_046711	RefSeq	39404598	39406346	POU6F2-AS1	POU6F2 antisense RNA 1	+	CCATTGGTACAATATTTTTAGGTCATCTGTCAATTGCCATGTTTGCATTTCTTTCATGCA	NR_046711
CUST_51516_PI430048170	4.2e-06	1.49e-08	-2.92006	ncRNA	lnc-OSGIN1-1:1	lncipedia	83908132	83951453			+	CATCACCAGAATACATACTGTGTCCATGCAGTGTTCTTACACATCAAAATTCATGAAAAA		lnc-OSGIN1-1:1
CUST_28409_PI430048170	0.0452	0.0099	3.14646	ncRNA	ENST00000553410	ENSEMBL_GENCODE	91532891	91535095	RP11-692C24.1			AGACTGATGTGTGCAGGAAGAAAAAACCAACCACTAAATCGGGGTTGGAAGTGAGAAGAA		ENST00000553410
CUST_90215_PI430048170	4.4e-06	1.58e-08	-2.48317	ncRNA	lnc-C8orf47-2:1	lncipedia	98031441	98036158			+	TTCTTTTGGTCATCTTTTTCTGCTCAGCTCTAGAAGACTCCGATGGAAGACAGGACTCTC		lnc-C8orf47-2:1
CUST_127144_PI430048170	4.4e-06	1.58e-08	-3.76582	mRNA	NM_001937	RefSeq	168695456	168729204	DPT	dermatopontin		CTCCTCCTGTGATGTCCTGCTCCCAACCATTTGTACTCTTCATTACAAAAGAAATAAAAA	NM_001937
CUST_86621_PI430048170	4.38e-05	5.77e-07	3.09764	ncRNA	lnc-HSF5-2:1	lncipedia	58389294	58391159			-	GTGGTTTTCATTCTACATGTAGTAAGGAAACTGCCTAGAATTGTTTTGGTCCCTGTTGAT		lnc-HSF5-2:1
CUST_14878_PI430048170	4.46e-06	1.62e-08	-3.04417	ncRNA	ENST00000485174	ENSEMBL_GENCODE	64685104	64743438	ADAMTS9-AS2		-	GTGTATCTTTTCCTGAGCTGGGTCTTTATGCAACAAAGGAACTGGAGGTAATCCATGCCT		ENST00000485174
CUST_61052_PI430048170	4.51e-06	1.65e-08	-2.97623	mRNA	NM_001168368	RefSeq	69259963	69354473	GALNT16	polypeptide N-acetylgalactosaminyltransferase 16%2C transcript variant 1		ATACTAAGCGCACTGCAGAAGTGTGGATGGATGAATACAAGCAATACTACTATGAGGCCC	NM_001168368
CUST_133189_PI430048170	4.51e-06	1.65e-08	-1.96122	mRNA	NM_001620	RefSeq	62515901	62546860	AHNAK	AHNAK nucleoprotein%2C transcript variant 1		AGGCCTTTGTATGTGTGTACATATATATATATATAACAAAACATCAGCCTTGGGTGGTGT	NM_001620
CUST_58632_PI430048170	4.54e-06	1.67e-08	-3.07538	ncRNA	NR_123740	RefSeq	8681676	8783098	RIMKLB	ribosomal modification protein rimK-like family member B%2C transcript variant 3	+	CCAACCTGTTTGATTCCGTCTGTTTTCTAAATAAAGACACTATGCGCTGGAAATAACATA	NR_123740
CUST_137323_PI430048170	4.7e-06	1.75e-08	-3.72465	mRNA	NM_001136103	RefSeq	128267402	128707915	TMEM132C	transmembrane protein 132C		AGCCTCCTAACCTGGGTTGGACCTTTGAAAAATATATTTGTAGCACATATTATAGATGGA	NM_001136103
CUST_132246_PI430048170	4.7e-06	1.75e-08	1.44656	mRNA	NM_001145939	RefSeq	42297032	42302777	PAFAH1B3	platelet-activating factor acetylhydrolase 1b%2C catalytic subunit 3 (29kDa)%2C transcript variant 1		TGACATGTATGATTACCTGCATCTGAGCCGCCTGGGCTACACACCTGTTTGCCGGGCTCT	NM_001145939
CUST_134340_PI430048170	4.7e-06	1.75e-08	2.76676	mRNA	NM_002203	RefSeq	52989325	53094779	ITGA2	integrin%2C alpha 2 (CD49B%2C alpha 2 subunit of VLA-2 receptor)%2C transcript variant 1		GCACACATAAAACAATGCCCTTTTGTGTACATTCAGGCATACCCATTTTAATCAATTTGA	NM_002203
CUST_69896_PI430048170	4.72e-06	1.77e-08	1.11297	mRNA	NM_032390	RefSeq	121726944	121736927	NIFK	nucleolar protein interacting with the FHA domain of MKI67		CATATCCTGTGTAAAAGAAGAAATACAAGAGACTCAAACACCTACACATTCACGGAAAAA	NM_032390
CUST_126788_PI430048170	4.77e-06	1.79e-08	-4.87832	mRNA	NM_001143981	RefSeq	110673855	110796058	CHRDL1	chordin-like 1%2C transcript variant 1		TGTTCTCACAGGACATGTACCTAATTATGGTACTTATTTATGTAGTCACTGTATTTCTGG	NM_001143981
CUST_14666_PI430048170	4.86e-06	1.83e-08	-2.6946	ncRNA	ENST00000450746	ENSEMBL_GENCODE	30524745	30527185	AC116035.1			GATAACTAAACCCTGGGAAGCTTAAGGAACAAAGTGTAACAAAACAACATGGATTGTTTT		ENST00000450746
CUST_14877_PI430048170	4.87e-06	1.84e-08	-3.86547	ncRNA	ENST00000460833	ENSEMBL_GENCODE	64684909	64802725	ADAMTS9-AS2		-	GAAGATACTACCTAAAATGATACTGAGCTGGCCAGTGTAATGACATGAAAACAAAACAAA		ENST00000460833
CUST_134315_PI430048170	4.88e-06	1.86e-08	-3.24747	mRNA	NM_001029858	RefSeq	117907525	118317676	SLC35F1	solute carrier family 35%2C member F1		CCTATGGACTGGCTGTGGCAATGTAATGCCTGTATAATGTTTTCAAATAAAAATAAATGC	NM_001029858
CUST_130992_PI430048170	4.93e-06	1.88e-08	1.0597	mRNA	NM_004398	RefSeq	108665024	108940930	DDX10	DEAD (Asp-Glu-Ala-Asp) box polypeptide 10		AGAGACTATGATGGACCAGCCCTGAGAAAGAATGAGTATTTTTGAATTGAGATGATCAAT	NM_004398
CUST_74882_PI430048170	4.96e-06	1.91e-08	-1.07951	mRNA	NM_207123	RefSeq	143336829	143474565	GAB1	GRB2-associated binding protein 1%2C transcript variant 1		GAATTATGTTCCCATGAACCCAAACCTGTCCAGTGAAGACCCATAACAGTCTTGATGGAG	NM_207123
CUST_10770_PI430048170	4.96e-06	1.91e-08	0.869637	ncRNA	ENST00000565390	ENSEMBL_GENCODE	40464319	40466767	RP1-228H13.5			TTTATTGTTTACTGTTGTTTCCCCTGGCTATAATGTAAGCTCCATGTGGGCAGGGGCCTT		ENST00000565390
CUST_14871_PI430048170	4.99e-06	1.93e-08	-6.08604	ncRNA	NR_110151	RefSeq	64561345	64590084	ADAMTS9-AS1	ADAMTS9 antisense RNA 1%2C transcript variant 2	-	AAACAAAGGCACGAAACACAAGAAAGGCAAGAGAATGCTAATCACCAGATGCATGGGCAT	NR_110151
CUST_31285_PI430048170	5.03e-06	1.95e-08	0.96841	ncRNA	ENST00000585028	ENSEMBL_GENCODE	4775054	5004524	RP11-172F10.1			GGAGCCCTGTGCCTTAGCCATGGTCAACCCACCATGTTCTTTGACATCGCCATCAACGTT		ENST00000585028
CUST_67744_PI430048170	5.03e-06	1.96e-08	0.965693	ncRNA	lnc-MRGPRE-1:5	lncipedia	3360315	3371147				ACTTTTTTCTAATAAAACAGGTCTCACTGTCTGTAAGCCAGGCCTGATCACCTGCCTGGA		lnc-MRGPRE-1:5
CUST_144918_PI430048170	5.06e-06	1.98e-08	1.20848	mRNA	NM_014377	RefSeq	103312473	103344873	DNAJC2	DnaJ (Hsp40) homolog%2C subfamily C%2C member 2%2C transcript variant 1		GTGCTGAATGCAAGTAGAGCCAAGAAATGACAATCTTTGTTGTGTGTGCATTTTTATAAT	NM_014377
CUST_70630_PI430048170	4.83e-05	6.72e-07	3.09016	ncRNA	lnc-WDR69-3:1	lncipedia	227813842	227815984			+	TTTCGAAATGAGCATCTTCTACCAGAAAGTGTTTGAGACCAAAAGTAAAATCTCAGACTA		lnc-WDR69-3:1
CUST_117836_PI430048170	5.16e-06	2.03e-08	-4.88402	mRNA	NM_004010	RefSeq	31119227	33128427	DMD	dystrophin%2C transcript variant Dp427p2		TTACTGAAGAACAGTGCCTTTTTAGTGCATGGCTTTCAGAAAAAGAAGATGCAGTGAACA	NM_004010
CUST_129486_PI430048170	5.22e-06	2.07e-08	1.13876	mRNA	NM_015969	RefSeq	55951917	55955340	MRPS17	mitochondrial ribosomal protein S17		CCAGTTTCTCTGTGGTGTTTATGAAATAGCTAAAAGCAAATGAAGTAAAGGGCATACTAT	NM_015969
CUST_71679_PI430048170	5.22e-06	2.07e-08	-2.04667	ncRNA	lnc-GABPA-10:1	lncipedia	25643488	25644216			+	TAAAACTTAAAACCAGGGATTGTTTTCTTGGACGGTGTTACTGTTAACAAGGCTAGAACT		lnc-GABPA-10:1
CUST_117853_PI430048170	0.00132	8.16e-05	3.08749	ncRNA	lnc-SLC6A14-1:1	lncipedia	116688869	116690185			+	CCCCAAAAAGAGACTGACAGTGACATACCTACTGTTAGTGGCAGCAGAAAACCAGAATGA		lnc-SLC6A14-1:1
CUST_132556_PI430048170	5.32e-06	2.13e-08	1.18451	mRNA	NM_018372	RefSeq	110947189	110963944	LRIF1	ligand dependent nuclear receptor interacting factor 1%2C transcript variant 1		GGACTATGTACATACGTTACTGAGATTGTGTAAAAAGTAGATCCTGAACAGTTATCACAT	NM_018372
CUST_143465_PI430048170	5.36e-06	2.15e-08	1.62757	mRNA	NM_014009	RefSeq	49250435	49264826	FOXP3	forkhead box P3%2C transcript variant 1		TTACTTCAGGGCTGGAAAAGTCACACAGACACACAAAATGTCACAATCCTGTCCCTCACT	NM_014009
CUST_109573_PI430048170	0.00626	0.000667	3.0862	ncRNA	lnc-SLCO1B3-1:2	lncipedia	20855091	20861054			+	CCCATCAGCATTTCACTGAAGCTGCTCTTTCTAAGTTATAGGTATTCTAAAGAAACCCAT		lnc-SLCO1B3-1:2
CUST_92323_PI430048170	5.53e-06	2.24e-08	-1.81626	ncRNA	lnc-FGF14-1:1	lncipedia	101719812	101721480			-	TTCCCCTCAGAAATTAAGTTTGCTGTTATTAAGTAAGAAGTGCAATCTGTCACTACTGAT		lnc-FGF14-1:1
CUST_119542_PI430048170	5.56e-06	2.26e-08	-3.03116	ncRNA	NR_123740	RefSeq	8681676	8783098	RIMKLB	ribosomal modification protein rimK-like family member B%2C transcript variant 3	+	GCAATAACTCCAACCTGTTTGATTCCGTCTGTTTTCTAAATAAAGACACTATGCGCTGGA	NR_123740
CUST_112558_PI430048170	5.6e-06	2.28e-08	0.979235	mRNA	NM_003223	RefSeq	4257185	4273000	TFAP4	transcription factor AP-4 (activating enhancer binding protein 4)		TCAGGAAAACAGAGAAAGAAGTGATAGGAGGGCTCTGTAGCCTTGCCAACATTCCACTAA	NM_003223
CUST_116518_PI430048170	5.62e-06	2.3e-08	1.23115	mRNA	NM_024678	RefSeq	78435960	78574864	NARS2	asparaginyl-tRNA synthetase 2%2C mitochondrial (putative)%2C transcript variant 1		CAGATTCAGGCCTTGACAGTAGAGAATTAAATTTTGGGAGTTCTGTGGAAGTACAAGGGC	NM_024678
CUST_135976_PI430048170	5.68e-06	2.33e-08	2.94086	mRNA	NM_001130677	RefSeq	2707024	2710253	C17orf96	chromosome 17 open reading frame 96		GGACTTGTCTCCTTTTCTGTGAAAATGCTTTGTAAAAAGTTGTTATTGTTTGCATAGAGC	NM_001130677
CUST_16517_PI430048170	2.52e-05	2.47e-07	3.0836	ncRNA	ENST00000514752	ENSEMBL_GENCODE	138105719	138169407	SLC7A11-AS1			CTGTGTCTTCTCATGATGAGTCCTAAAAATAAGCCAAAATACTACTTAATCTCCATCACT		ENST00000514752
CUST_74883_PI430048170	5.71e-06	2.36e-08	-1.21734	ncRNA	lnc-SMARCA5-6:5	lncipedia	143465996	143469639			+	AATACTTTCAGAATCTCTTTGGCAGTAACAGTCTTGATGGAGGAAGCAGCCCTATGATCA		lnc-SMARCA5-6:5
CUST_37928_PI430048170	1.56e-07	1.02e-10	3.07728	ncRNA	lnc-ITGB8-4:1	lncipedia	20136066	20139199				GACAAAAAGCCTGAGGAACTGAAAGAACCATGTAAACATTTTCTGCTTTCAAAATGCTTA		lnc-ITGB8-4:1
CUST_136923_PI430048170	5.76e-06	2.42e-08	-1.85026	mRNA	NM_004822	RefSeq	9021541	9244000	NTN1	netrin 1		AATGGTTCCTGCCTTCAGGAAAGTGAAAGACGCTTAGGCTGTCAACACTTAAAGGAAGTC	NM_004822
CUST_133490_PI430048170	5.76e-06	2.43e-08	-3.25925	mRNA	NM_000851	RefSeq	109712241	109718268	GSTM5	glutathione S-transferase mu 5		TGATCTAGATATCCTTCGTCATGACACTTCTCAATAAAACGTATCCCACCGTATTGTAAA	NM_000851
CUST_73473_PI430048170	5.76e-06	2.43e-08	1.32935	mRNA	NM_003707	RefSeq	128080956	128123828	RUVBL1	RuvB-like AAA ATPase 1		GCTTTGAAAGAACCCTTCCTTACCTGGTGTGTTTTCTATAAATCTTCATAGGTTATTTTG	NM_003707
CUST_22498_PI430048170	5.76e-06	2.43e-08	-3.42416	ncRNA	ENST00000608792	ENSEMBL_GENCODE	4201141	4243912	LINC00702			TGAGCCTGGCCATTACATTCAGTTCTGCTGTCTTTAAAATAAAAACCCTGGATTAAGTCA		ENST00000608792
CUST_133327_PI430048170	5.76e-06	2.44e-08	1.95721	mRNA	NM_001199207	RefSeq	74453789	74602593	GTF2IRD1	GTF2I repeat domain containing 1%2C transcript variant 3		ATCGATGCCTTTTAGTTTTTCCAATGATTTTTACACTATATTCCTGCCACCAAGGCCTTT	NM_001199207
CUST_91153_PI430048170	5.81e-06	2.47e-08	-2.92463	mRNA	NM_001242780	RefSeq	69149	71433	LOC100506388	uncharacterized LOC100506388%2C transcript variant 1		CATTTATGTACAAATTGTAATAAAATTGGGTTCTTACTGCATACGCTGCTTGCTGGTTTC	NM_001242780
CUST_133099_PI430048170	5.81e-06	2.47e-08	-4.01099	mRNA	NM_000345	RefSeq	89724098	89837199	SNCA	synuclein%2C alpha (non A4 component of amyloid precursor)%2C transcript variant 1		GCAAACATGTTTCCTCATCTTTCTGGCTTATCCAGTATGTAGCTATTTGTGACATAATAA	NM_000345
CUST_138391_PI430048170	5.9e-06	2.52e-08	-4.21374	mRNA	NM_002725	RefSeq	203475754	203491351	PRELP	proline/arginine-rich end leucine-rich repeat protein%2C transcript variant 1		AAGGGAAAGAAATCCATGAATGGATACCTCTGTGTCCTAAGTGTTTGTAATAATGCTGTG	NM_002725
CUST_94062_PI430048170	6.16e-06	2.65e-08	-2.25528	mRNA	NM_001003793	RefSeq	29281311	30010395	RBMS3	RNA binding motif%2C single stranded interacting protein 3%2C transcript variant 1		TTGAGAATATGCTGAAACCCTTTGGACATGTCATTTCCACAAGAATACTAAGAGACGCTA	NM_001003793
CUST_105825_PI430048170	6.16e-06	2.65e-08	-2.93074	ncRNA	lnc-PPARG-1:1	lncipedia	12004401	12191400			+	CAAGCTTTGTGTTCATCTCCTAATAAACGTTAAGACCTTTGGTGTAATAAAAGCAGCAGC		lnc-PPARG-1:1
CUST_139855_PI430048170	6.19e-06	2.67e-08	1.24962	mRNA	NM_001256879	RefSeq	44114679	44123508	POLD2	polymerase (DNA directed)%2C delta 2%2C accessory subunit%2C transcript variant 3		AGTCAGATTTTTGGGGACATCAGGACAGAACGTGAGTGACATTTTCCGATACAGCAGCAT	NM_001256879
CUST_66688_PI430048170	6.19e-06	2.68e-08	0.769423	mRNA	NM_017892	RefSeq	152651592	152717461	PRPF40A	PRP40 pre-mRNA processing factor 40 homolog A (S. cerevisiae)		AAATTGGCTTTCAATAGTTTACTAGAAAAGGCAGAAGCCCGTGAACGTGAAAGAGAAAAA	NM_017892
CUST_1683_PI430048170	6.21e-06	2.7e-08	-2.95319	ncRNA	NR_123740	RefSeq	8681676	8783098	RIMKLB	ribosomal modification protein rimK-like family member B%2C transcript variant 3	+	CTGTTTGATTCCGTCTGTTTTCTAAATAAAGACACTATGCGCTGGAAATAACATAGCAAA	NR_123740
CUST_120595_PI430048170	6.21e-06	2.71e-08	0.900659	ncRNA	NONHSAT048112	NONCODE	85770989	85771163			-	TTGTCAAGACCCTCACCAGAGTCTCCATGCAGAGGACCTACGCTCCAGCTGTGGCTACAA		NONHSAT048112
CUST_58630_PI430048170	6.22e-06	2.72e-08	-3.05199	ncRNA	NR_123740	RefSeq	8681676	8783098	RIMKLB	ribosomal modification protein rimK-like family member B%2C transcript variant 3	+	GAAAGCAATAACTCCAACCTGTTTGATTCCGTCTGTTTTCTAAATAAAGACACTATGCGC	NR_123740
CUST_134337_PI430048170	6.44e-06	2.83e-08	-4.04783	mRNA	NM_001144996	RefSeq	55684569	55707902	ITGA7	integrin%2C alpha 7%2C transcript variant 1		TTTCCCCTCTCATCTGACCTTAGTTTGCTGCCATCAGTCTAGTGGTTTCGTGGTTTCGTC	NM_001144996
CUST_134104_PI430048170	6.61e-06	2.92e-08	-3.05778	mRNA	NM_002825	RefSeq	137227345	137343800	PTN	pleiotrophin		AATGTAGTCAGCAAAATGGGGGTGGGGAAGCAGAGCATGTCCTAGTTCAATGTTGACTTT	NM_002825
CUST_67818_PI430048170	6.61e-06	2.93e-08	3.69537	mRNA	NM_205854	RefSeq	2186501	2187327	SFTA2	surfactant associated 2		AAGATCTCAACACCATGTTGTCTGCAACACATGACAGCCATTGAAGCCTGTGTCCTTCTT	NM_205854
CUST_95309_PI430048170	6.62e-06	2.94e-08	-2.43489	ncRNA	lnc-ABCA9-3:1	lncipedia	68894783	68903427			-	GAGCCATCACAGTGTGTTGTAATGAAAAGGTATGCAGGTCTCTAATAATCTTTCTGAAAA		lnc-ABCA9-3:1
CUST_16366_PI430048170	3.27e-06	1e-08	3.07286	ncRNA	NR_029374	RefSeq	108167524	108176430	LEF1-AS1	LEF1 antisense RNA 1%2C transcript variant 2	-	TGGAGTTGAAGAATTTTCCAGTGAGTTCCATCAAAGTAAATAAACCAACCTAGAGCATCA	NR_029374
CUST_73229_PI430048170	6.77e-06	3.03e-08	-2.77951	mRNA	NM_001167674	RefSeq	84958981	86074429	CADM2	cell adhesion molecule 2%2C transcript variant 1		GATAGTGAAAATCATACGCAATAAAATATTGATGTTTGAAGGCAGTGGTCACCAATTGGT	NM_001167674
CUST_60643_PI430048170	6.66e-06	2.97e-08	3.06665	ncRNA	lnc-OR4E2-7:1	lncipedia	22011909	22014964				TGACAGCATTCCCAAACATCAGTTCCTTTACTTCCTGGAAGAAAACAAGGTTGCAGTCTT		lnc-OR4E2-7:1
CUST_135517_PI430048170	6.83e-06	3.07e-08	1.14655	mRNA	NM_176880	RefSeq	19201410	19203429	NR2C2AP	nuclear receptor 2C2-associated protein%2C transcript variant 2		CAGGAACCTCAACTTCCCCTAAGTTTGTAAAAATGCACTTTTGTAGCTTTTCAGAATTAA	NM_176880
CUST_73279_PI430048170	6.92e-06	3.12e-08	-2.13072	ncRNA	lnc-TOMM70A-2:1	lncipedia	100752506	100765906			-	AACAGTGCCATCATGACAAACTGGAATGTACATTCACTAACCATGGTCAAACTCCATTTT		lnc-TOMM70A-2:1
CUST_48039_PI430048170	7.46e-05	1.35e-06	3.05459	ncRNA	lnc-RNASEH2B-3:4	lncipedia	50401225	50631599				GAACTGACAAAAGCTAAAACTACACAAAGTGAGATTTGCTCATGCATTAATGTAAACAGG		lnc-RNASEH2B-3:4
CUST_109225_PI430048170	6.95e-06	3.16e-08	-2.3938	ncRNA	lnc-C10orf57-2:1	lncipedia	80144047	80145030			+	ACCAGCCCTGTCCTCTCGACTTCCTTCCTTAGCTTCATGTGAAATAAAAGCTATTCTGGT		lnc-C10orf57-2:1
CUST_58808_PI430048170	6.99e-06	3.19e-08	1.06721	mRNA	NM_001145010	RefSeq	27466809	27502185	SMCO2	single-pass membrane protein with coiled-coil domains 2		CTTGAATTTGGAAGTGGAAGCCTTGTTACCCTCCTAAAGATACAGAAGTTACTGTCACCC	NM_001145010
CUST_78494_PI430048170	7.16e-06	3.28e-08	1.15953	mRNA	NM_001762	RefSeq	56051684	56063989	CCT6A	chaperonin containing TCP1%2C subunit 6A (zeta 1)%2C transcript variant 1		ATGCATTGGATCAGTTGGACTTTGAACGCCTTTGAAATGGCTTTGCTAAAATGCTCCCGC	NM_001762
CUST_49460_PI430048170	7.22e-06	3.32e-08	2.70137	mRNA	NM_001195243	RefSeq	129502478	129512932	SMKR1	small lysine-rich protein 1		TGGAAGATCAGGAAATGCACCTTACTTCCTCTGTTATGCCAGATATGGTTAGCCACTTTG	NM_001195243
CUST_34332_PI430048170	0.00133	8.3e-05	3.05013	ncRNA	ENST00000609330	ENSEMBL_GENCODE	25434324	25435070	CTA-246H3.12		+	GGAAAGTTCACCTTTCTACCTAGTTGCCTCTGAAAATGTATCCTAAAATGAAATAAACAC		ENST00000609330
CUST_134631_PI430048170	7.32e-06	3.38e-08	1.0915	mRNA	NM_015131	RefSeq	28894642	28948220	WDR43	WD repeat domain 43		AACCAGCTGCTGGTGTAATGTACAGTTATATTTGTCTATAAATGGAGCTGTTTATGGCAA	NM_015131
CUST_110082_PI430048170	7.32e-06	3.4e-08	0.840867	ncRNA	lnc-BAIAP3-3:2	lncipedia	1309698	1320210			+	TATCCATCTTCGCCACCAAAATGTAAGTAAATTCGAACCACCATTATTTCACCCGAATGT		lnc-BAIAP3-3:2
CUST_38217_PI430048170	7.32e-06	3.41e-08	-3.02012	ncRNA	NR_123740	RefSeq	8681676	8783098	RIMKLB	ribosomal modification protein rimK-like family member B%2C transcript variant 3	+	AGCAATAACTCCAACCTGTTTGATTCCGTCTGTTTTCTAAATAAAGACACTATGCGCTGG	NR_123740
CUST_135819_PI430048170	7.44e-06	3.47e-08	-6.41732	mRNA	NM_133459	RefSeq	59430938	59697412	CCBE1	collagen and calcium binding EGF domains 1		GTCCATGTAACAGTCAAGTTAGCATTCAAGCAATTATGGATGTGATACTATGATGTACTT	NM_133459
CUST_56558_PI430048170	7.57e-06	3.55e-08	-1.84937	ncRNA	lnc-SFTPA2-6:1	lncipedia	79404302	79406097			-	GAAACAGATAACTTAGGGAGTGGCTGTTCATGTGATTAAAATGTCTTTGCTTTCCAAAAA		lnc-SFTPA2-6:1
CUST_138262_PI430048170	7.67e-06	3.6e-08	1.20045	mRNA	NM_001142928	RefSeq	150323206	150338156	LRRC61	leucine rich repeat containing 61%2C transcript variant 1		CTTCTCTGCCCGTTCTTGTCCACACATCTATTAAATGCTTCTGTTTTCATTTGCAAAAAA	NM_001142928
CUST_68281_PI430048170	7.67e-06	3.62e-08	-2.90645	ncRNA	lnc-AC091435.1-8:1	lncipedia	38485596	38489245			-	TGGCTGGTAGAGGGAAGGGTTAAAAAGCTGTAAGATTACTTCATGTTTATTCTTGTCAGT		lnc-AC091435.1-8:1
CUST_5020_PI430048170	7.69e-06	3.64e-08	-2.73369	ncRNA	NR_002773	RefSeq	42867144	42869217	AOC4P	amine oxidase%2C copper containing 4%2C pseudogene	+	AACTATGACTATGTGTGGGATATGGTCTTCCACCCTAATGGGGCCATAGAAATCAGACTC	NR_002773
CUST_135420_PI430048170	7.73e-06	3.68e-08	-3.68603	mRNA	NM_015678	RefSeq	34942286	35672736	NBEA	neurobeachin%2C transcript variant 1		GCTATTGTAACCATGTTTTATTGCAAAGATGTAAAATATGCCAGATGTGTGTGAGTTGGA	NM_015678
CUST_129276_PI430048170	7.73e-06	3.68e-08	2.31039	mRNA	NM_004237	RefSeq	892853	918049	TRIP13	thyroid hormone receptor interactor 13%2C transcript variant 1		GGTCAGTTACTGGTCTCTTTCTCCGAATGTTATGTTTTGCTTTTATCTCACAGTAAAATA	NM_004237
CUST_126436_PI430048170	7.77e-06	3.71e-08	-2.6707	mRNA	NM_001242780	RefSeq	69149	71433	LOC100506388	uncharacterized LOC100506388%2C transcript variant 1		AAATTGGGTTCTTACTGCATACGCTGCTTGCTGGTTTCTAAATAAAATTGGGTTCTTACT	NM_001242780
CUST_143490_PI430048170	7.8e-06	3.74e-08	1.65194	mRNA	NM_018256	RefSeq	202880599	202912226	WDR12	WD repeat domain 12		GAAAGCAGCCTTTTGAAGTTTATATAATGTTTTCACCCTTCATAACAGCTAACGTATCAC	NM_018256
CUST_140270_PI430048170	7.81e-06	3.75e-08	-4.86292	mRNA	NM_006790	RefSeq	137867855	137887851	MYOT	myotilin%2C transcript variant 1		CTTGTAGGAATACTAACATGGTATAGATTATCTGAGTGTTCCACAGTTGTATGTCAAAAG	NM_006790
CUST_60205_PI430048170	3.81e-05	4.71e-07	3.03831	ncRNA	lnc-SPRYD7-5:1	lncipedia	50190526	50228452				CCTATCTGCTCTTCAGATGCTGGGAGCATACTAGATAAGTAGATAATTTTAAAAGTATCC		lnc-SPRYD7-5:1
CUST_139824_PI430048170	8.06e-06	3.91e-08	3.85889	mRNA	NM_000836	RefSeq	48394874	48444931	GRIN2D	glutamate receptor%2C ionotropic%2C N-methyl D-aspartate 2D		CTCTCTTATTCCACATTGCAGTGTTTGGAATAAACCATGTTTTTATGCCTCCTCAAAAAA	NM_000836
CUST_97129_PI430048170	8.06e-06	3.91e-08	1.70458	mRNA	NM_004237	RefSeq	892853	918049	TRIP13	thyroid hormone receptor interactor 13%2C transcript variant 1		AATTCAGATTGTTTGTCTCCTTGTGAAGAACCATCGAAACCTGTTTGTTCCCAGCCCACC	NM_004237
CUST_93398_PI430048170	8.09e-06	3.94e-08	-2.06388	mRNA	NM_004615	RefSeq	38561477	38688918	TSPAN7	tetraspanin 7		TTTGGATGCTTTGCTACATGTCGTGGTAGCCCATGGATGCTGAAACTGTATGCCATGTTT	NM_004615
CUST_129776_PI430048170	8.09e-06	3.95e-08	-3.87421	mRNA	NM_001001995	RefSeq	13770942	13817195	GPM6B	glycoprotein M6B%2C transcript variant 1		CTATCAGTGCCAAGGGCTTCCTGTAGTTCTATTCAAGTGTTACAATAAATATTTGTAGAT	NM_001001995
CUST_29298_PI430048170	0.000379	1.45e-05	3.02022	ncRNA	NR_110454	RefSeq	54918862	54928778	CRNDE	colorectal neoplasia differentially expressed (non-protein coding)%2C transcript variant 4		ATGCAAAGAACATGGAAAAATCAAAGTGCTCGAGTGGTTTAAATATGTTTTGGGTATTCC	NR_110454
CUST_16933_PI430048170	8.14e-06	4.04e-08	-2.59508	ncRNA	ENST00000511693	ENSEMBL_GENCODE	1933863	1959176	RP11-259O2.1			TGCCCATGTGTATTCTGTAGTAGGAGTTTGCATTCTGAAACTGGTCTTTATTAAAGAACA		ENST00000511693
CUST_104918_PI430048170	8.14e-06	4.05e-08	1.10712	mRNA	NM_001193379	RefSeq	63939828	63951174	UCKL1	uridine-cytidine kinase 1-like 1%2C transcript variant 2		TGACTTCACCACGCACAGCCGGAAGAAGGACTGGAAAACACTGTATGGTGCAAACGTCAT	NM_001193379
CUST_17533_PI430048170	8.14e-06	4.06e-08	-2.62035	ncRNA	NR_104031	RefSeq	88889307	88967279	MEF2C-AS1	MEF2C antisense RNA 1%2C transcript variant 1	-	CTCTAAACATGAATATGCCTTTGGGGGAAGACAGAAGAACATGGAAGCCATGTGAAAAAA	NR_104031
CUST_125047_PI430048170	8.14e-06	4.06e-08	-2.63009	ncRNA	NR_003551	RefSeq	90119399	90125600	DPY19L2P4	DPY19L2 pseudogene 4		GCCCCAAAGCTTGTTGGTCATAGTCTATTTCTGGCCATTATCTTCTTAAATAATCTATTT	NR_003551
CUST_12823_PI430048170	0.0152	0.00222	2.99931	ncRNA	ENST00000444871	ENSEMBL_GENCODE	44931122	44938888	RP11-89K21.1		-	GGCAAACACTATGTCCTTTTCTTTTTCTAGATACAGTTAATTCCTGGAAATTTTAGCGAG		ENST00000444871
CUST_137786_PI430048170	8.14e-06	4.07e-08	1.36059	mRNA	NM_021129	RefSeq	70202829	70233434	PPA1	pyrophosphatase (inorganic) 1		GCTGATATTGCTACATCGTGTTCATCTGGATGTATTAGAAGTAAAAGTAGTAGCTTTTCA	NM_021129
CUST_134376_PI430048170	8.14e-06	4.08e-08	-4.97002	mRNA	NM_021973	RefSeq	173526500	173530227	HAND2	heart and neural crest derivatives expressed 2		TTTCCAACAGCCACTTGTTTTGTGCACTTCCGTCCTCTAAAACTAAATGGAATTTAATTA	NM_021973
CUST_14663_PI430048170	8.14e-06	4.09e-08	-3.19491	ncRNA	NR_109804	RefSeq	29264193	29280939	RBMS3-AS3	RBMS3 antisense RNA 3	+	TGTGTAGGCAAAACACAATAGTCTCCAATGCCAAATAAACTTTGTTTTGTTACTCTCTCA	NR_109804
CUST_107954_PI430048170	8.14e-06	4.1e-08	0.863695	ncRNA	lnc-NINL-1:1	lncipedia	25368274	25368766			-	AAACTTCATCCTAAAGCATACAGGTCCTAGCATCTTGTCCATGGCAAATGCTGGACCCAA		lnc-NINL-1:1
CUST_56253_PI430048170	8.18e-06	4.14e-08	-4.07334	ncRNA	lnc-CXCL12-4:1	lncipedia	44378556	44386493			-	CAAAAAGGACTTTCCGCTAGACCCACTCGAGGAAAACTAAAACCTTGTGAGAGATGAAAG		lnc-CXCL12-4:1
CUST_135185_PI430048170	8.18e-06	4.16e-08	-2.45707	mRNA	NM_020813	RefSeq	56507842	56528900	ZNF471	zinc finger protein 471		GAATGTGCAAATGTCCTCAGACAAGATGCACACCTTGCTCATTAGTGAGTTCATTTCAGG	NM_020813
CUST_29827_PI430048170	8.18e-06	4.16e-08	-2.84902	mRNA	NM_001242780	RefSeq	69149	71433	LOC100506388	uncharacterized LOC100506388%2C transcript variant 1		TTGGGTTCTTACTGCATACGCTGCTTGCTGGTTTCTAAATAAAATTGGGTTCTTACTATA	NM_001242780
CUST_134643_PI430048170	8.25e-06	4.21e-08	0.988035	mRNA	NM_032382	RefSeq	69328620	69339623	COG8	component of oligomeric golgi complex 8		AATAATGTAGTCCCCAAATACCTGAAAGCTGTCTTTAAAAATGCAGGTAAGCATGTGACT	NM_032382
CUST_134954_PI430048170	8.25e-06	4.22e-08	2.75905	mRNA	NM_001130448	RefSeq	40769960	40772449	C15orf62	chromosome 15 open reading frame 62		TTGTGTATAGGTACCGAGCTGTGGATACAGGAGAGAATGAATAAAATTCTAACACAAAAA	NM_001130448
CUST_144646_PI430048170	8.3e-06	4.27e-08	0.88845	mRNA	NM_001282208	RefSeq	34634721	34637826	SIGMAR1	sigma non-opioid intracellular receptor 1%2C transcript variant 9		GCTGCATTCTCTGTCCATCTGTCTGTTTCTATTAATAAAGATTTGTTGATCTGTTCCAAA	NM_001282208
CUST_140859_PI430048170	8.3e-06	4.27e-08	-3.16517	mRNA	NM_001130064	RefSeq	115623303	115721487	GAP43	growth associated protein 43%2C transcript variant 1		GCGGCTCTAAGGCTCCTTTTTCAACCCGAATATTAATAAATCATGAGAGTAATCAAGGTC	NM_001130064
CUST_9352_PI430048170	8.31e-06	4.29e-08	-4.777	ncRNA	NR_105060	RefSeq	149406844	149432836	MIR143HG	MIR143 host gene%2C transcript variant 2	+	GTCAGTTGGGAGTCTGAGATGAAGCACTGTAGCTCAGGAAGAGAGAAGTTGTTCTGCAGC	NR_105060
CUST_110565_PI430048170	8.42e-06	4.36e-08	-2.32333	ncRNA	lnc-TGFA-2:1	lncipedia	70656783	70658325			-	TCTGTATGTGTGTGCTGTTACCTCACCTGCAGACATGACCCTAGTAAATCTAACGTGCTT		lnc-TGFA-2:1
CUST_137402_PI430048170	8.51e-06	4.42e-08	-4.80778	mRNA	NM_194272	RefSeq	64739895	64775571	RBPMS2	RNA binding protein with multiple splicing 2		TACGCCTTTGTGTCTGGCATTTGTTTAAGAAAATGAAATGAAGGAAACACTGTGCAATGT	NM_194272
CUST_52116_PI430048170	8.53e-06	4.44e-08	1.37616	mRNA	NM_001144002	RefSeq	16587998	16712217	CTPS2	CTP synthase 2%2C transcript variant 3		TCCAGAGGCAGCCTTTGGTACTTAAAATATCTGTAGCTGATTAAATTTTTCCCAACAACC	NM_001144002
CUST_97141_PI430048170	8.57e-06	4.48e-08	-3.50675	mRNA	NM_001291976	RefSeq	87473329	87529503	SPARCL1	SPARC-like 1 (hevin)%2C transcript variant 3		TATTATCTGATCATTCCAAACCAACTGCTGAAACGGTAGCACCTGACAACACTGCAATCC	NM_001291976
CUST_72198_PI430048170	8.57e-06	4.49e-08	3.73836	mRNA	NM_005940	RefSeq	9210	20678	MMP11	matrix metallopeptidase 11		TTTACTGAGGTGCACGAGGGCCGTGCTGACATCATGATCGACTTCGCCAGGTACTGGCAT	NM_005940
CUST_143807_PI430048170	8.58e-06	4.5e-08	-0.922944	mRNA	NM_007184	RefSeq	52455507	52493072	NISCH	nischarin%2C transcript variant 1		ATTCCTGCTGCCTGTATTCTCTATTCCAATAAAGCAGAGTTTGACACCGTCTGCAAAAAA	NM_007184
CUST_81921_PI430048170	8.6e-06	4.54e-08	0.792049	ncRNA	lnc-POU3F4-3:1	lncipedia	82875648	82875885				AATGCCTGGAAACAAACTCTGAACAAATTGAAAAACGGCCTTTTGAGTCTTTCTGATACC		lnc-POU3F4-3:1
CUST_92405_PI430048170	8.6e-06	4.54e-08	1.13772	mRNA	NM_014390	RefSeq	127652147	128092607	SND1	staphylococcal nuclease and tudor domain containing 1		AGCTAATAATCCTGAGCAGAACCGGCTTTCAGAATGTGAAGAACAAGCAAAGGCAGCCAA	NM_014390
CUST_69937_PI430048170	8.69e-06	4.61e-08	-4.60583	ncRNA	NR_120327	RefSeq	33303656	33310659	LOC101928134	uncharacterized LOC101928134%2C transcript variant 2	+	CGTAGAGCAAGATCCTGGAGTGTCTTCTTAATCATCAAATATTGTCCTCTATAAAGTTAT	NR_120327
CUST_132570_PI430048170	8.69e-06	4.62e-08	-3.48399	mRNA	NM_000023	RefSeq	50166004	50175932	SGCA	sarcoglycan%2C alpha (50kDa dystrophin-associated glycoprotein)%2C transcript variant 1		TGTGGAGTAAGGACATTCAGAATAAATATCTGCTGCTCTGCTCACCAATTGCTGCTGGCA	NM_000023
CUST_133649_PI430048170	8.72e-06	4.65e-08	1.24028	mRNA	NM_002047	RefSeq	30594564	30634032	GARS	glycyl-tRNA synthetase		CTTATGTCCACTTTACAAAAGAAAACAGCATTGTGATTACTCCCAGGGACCGTATTTTAT	NM_002047
CUST_112407_PI430048170	0.000482	2.02e-05	2.98809	ncRNA	NR_110454	RefSeq	54918862	54928778	CRNDE	colorectal neoplasia differentially expressed (non-protein coding)%2C transcript variant 4		TGTCACGCAGAAGAAGGTTAAGCTGTATTTGATTGCCAGTTTTACTGAAAATGCTTAGTA	NR_110454
CUST_130696_PI430048170	8.8e-06	4.71e-08	2.86045	mRNA	NM_021619	RefSeq	130664593	130682997	PRDM12	PR domain containing 12		GAGTTTTCAAGAAACTGCGTTCTACTTCCAGAAGATGGTCACTTTAACCTTGTAAATATT	NM_021619
CUST_141963_PI430048170	8.85e-06	4.77e-08	-2.3058	mRNA	NM_015559	RefSeq	44680897	45068510	SETBP1	SET binding protein 1%2C transcript variant 1		TCAGTCTTTTCCGCTACCAGATCAGGTTAGCACAGTATAGAGCACTTAACTATTAAAAAA	NM_015559
CUST_127623_PI430048170	8.85e-06	4.77e-08	-3.04203	mRNA	NM_032504	RefSeq	209771992	209999300	UNC80	unc-80 homolog (C. elegans)%2C transcript variant 1		CTTCCCTCAGATAACTATGAAGTCTATTATGAGTACTGAATGACCAAAGAACATGGAAAA	NM_032504
CUST_119736_PI430048170	8.85e-06	4.79e-08	0.933565	ncRNA	NONHSAT029745	NONCODE	84939523	84939668				TCTCCAAGACGTTCCTGCGTGAGGACAGAGACATCGTGGTTCTGAGGAACTCGCTCATCG		NONHSAT029745
CUST_63112_PI430048170	3.61e-08	1.21e-11	2.97261	ncRNA	lnc-ITGB3-2:1	lncipedia	47423476	47426690				AGTCGGTTACTTCAAAAAGAGCAAACACTGGGGATCAAATTGTTTTAAGAGGTATTTCAG		lnc-ITGB3-2:1
CUST_57617_PI430048170	8.85e-06	4.83e-08	-1.53265	ncRNA	lnc-ROM1-7:4	lncipedia	62515918	62532883			-	ACATCTGGTGCTTTAATATCTACCTTGGGACCTCTGATGTCCACATCTGGAACCTGCATT		lnc-ROM1-7:4
CUST_144318_PI430048170	8.85e-06	4.84e-08	-3.29437	mRNA	NM_153366	RefSeq	110365248	110579880	SVEP1	sushi%2C von Willebrand factor type A%2C EGF and pentraxin domain containing 1		GGCCAGTCTTACATGCTTATGAGTCTACTTTCCAATAAATTTACTCATAGTCCATTAACT	NM_153366
CUST_69260_PI430048170	8.85e-06	4.84e-08	-3.9301	mRNA	NM_000023	RefSeq	50166004	50175932	SGCA	sarcoglycan%2C alpha (50kDa dystrophin-associated glycoprotein)%2C transcript variant 1		GGGTGGGGTGAGAGTGTGTGGAGTAAGGACATTCAGAATAAATATCTGCTGCTCTGCTCA	NM_000023
CUST_127884_PI430048170	8.87e-06	4.86e-08	-2.76782	mRNA	NM_013434	RefSeq	95297323	95386077	KCNIP3	Kv channel interacting protein 3%2C calsenilin%2C transcript variant 1		GAGGGTGGTTCCTGTTCTCAGCATCCACTAATATTCAGTCCTGTATATTTTAATAAAATA	NM_013434
CUST_126907_PI430048170	8.87e-06	4.88e-08	-1.18405	mRNA	NM_006336	RefSeq	128729787	128771934	ZER1	zyg-11 related%2C cell cycle regulator		GGGGAAATGTCTGTACTTTGGGAAGTCACAGAAATACATTTTTGTGCAAAATGGAAAAAA	NM_006336
CUST_89776_PI430048170	8.87e-06	4.89e-08	-1.93805	ncRNA	lnc-AC091435.1-7:1	lncipedia	38501922	38504109			-	GCCACCATATTACGATAATGCATAGAATGATTTTTCTCCCATTCTTTTCTGCTTGGAATT		lnc-AC091435.1-7:1
CUST_59182_PI430048170	8.96e-06	4.95e-08	-2.24213	mRNA	NM_173812	RefSeq	63558912	63668574	DPY19L2	dpy-19-like 2 (C. elegans)		CACTTAAGGCAGAAGAATGCAAGCTCTGAAATGACATCCTTAAAATGCTGATACTGGTCA	NM_173812
CUST_135821_PI430048170	8.99e-06	5.02e-08	1.16564	mRNA	NM_022458	RefSeq	156680875	156893208	LMBR1	limb development membrane protein 1		AGGCTCTTATGTGCTAGTTTTGTTGGTAGCACGTTATTTAATGCATAAAGGCAGAATTCT	NM_022458
CUST_89993_PI430048170	8.99e-06	5.02e-08	-1.34043	ncRNA	NR_125872	RefSeq	68632662	68634324	LOC101928307	uncharacterized LOC101928307		CCTCAGCTCTCTGTCCTTTCCTTTCTATTGATGTTGGTCCACTTTTATGACTGAATACAT	NR_125872
CUST_137923_PI430048170	8.99e-06	5.03e-08	-1.40753	mRNA	NM_001025616	RefSeq	85475130	86002670	ARHGAP24	Rho GTPase activating protein 24%2C transcript variant 1		CGTCTGTGGTCCTATGGTATCAACCAGTATCTTTATAGCAATAATTTCTTTAATTCCCTT	NM_001025616
CUST_102245_PI430048170	8.99e-06	5.03e-08	-2.47307	ncRNA	lnc-AHR-8:3	lncipedia	18290187	18327758				ACAACAGAACATGGAATGTGCGACACTTCATCTTGGGATGCAAATTTTTGTGCTAAAAAA		lnc-AHR-8:3
CUST_95859_PI430048170	5.97e-07	7.55e-10	2.96977	ncRNA	lnc-ZNHIT1-1:3	lncipedia	101308298	101311734				CTCTCAGCTGAAAAGAGCTACATCTACCATTTCATCTACTTAGTGTATTTTCTTATTGGC		lnc-ZNHIT1-1:3
CUST_72015_PI430048170	8.99e-06	5.07e-08	-3.19048	ncRNA	lnc-CECR2-5:2	lncipedia						AGCAGCAACAAAAATAAAATGGCTTCCTGATAACCAAACTGAGGAGTCCGTAAGAAAAAA		lnc-CECR2-5:2
CUST_113415_PI430048170	0.00204	0.000148	2.96633	ncRNA	lnc-PCDH11X-1:1	lncipedia	93042489	93042942				CATCAAGAACATGCCAGACACATTTTATTTGGTGGTAAGCTGATTGCTTTTTCACATTTA		lnc-PCDH11X-1:1
CUST_84214_PI430048170	0.000657	3.12e-05	2.96291	ncRNA	NR_026774	RefSeq	101730436	101732525	LINC00239	long intergenic non-protein coding RNA 239		ACTGTGTTTCTAATGGGTACTGGGATCAAAATAATAAAAACTCAGTCTGCAAAGGGAGAA	NR_026774
CUST_134818_PI430048170	8.99e-06	5.09e-08	1.37819	mRNA	NM_025215	RefSeq	131929267	131943861	PUS1	pseudouridylate synthase 1%2C transcript variant 1		GAATCTGTTTTCAGCTCTTGCATTGCATAGATGAACCTCAGCATGTAAAGAACTATTTTT	NM_025215
CUST_144613_PI430048170	9.03e-06	5.15e-08	-4.95043	mRNA	NM_006252	RefSeq	56645316	56715335	PRKAA2	protein kinase%2C AMP-activated%2C alpha 2 catalytic subunit		AGATCACAGTTTCACAAATTGTGGTGTTGTTAGGTGACATTTAATATTTCTTGAGACCTC	NM_006252
CUST_111071_PI430048170	9.03e-06	5.16e-08	-2.05732	mRNA	NM_001282714	RefSeq	58564111	58627610	FAM107A	family with sequence similarity 107%2C member A%2C transcript variant 4		AGCCAATACCAGCCGCCATCCTTCTCCAGAATTCTTGTAAATAAAATAAATCCCTCTTTG	NM_001282714
CUST_134159_PI430048170	9.03e-06	5.17e-08	1.3947	mRNA	NM_199285	RefSeq	42302131	42310821	PRR19	proline rich 19		GGACAGATATCTTGTACTCCCAGTGACCTCAATAAAGTACTTTTCATGGTCCTCTTGAAA	NM_199285
CUST_17641_PI430048170	0.00335	0.00029	2.94815	ncRNA	ENST00000514769	ENSEMBL_GENCODE	104079911	104105403	RP11-138J23.1			GCAAATTATATTACACATTGGACACATCCTAAATGATGCAAGGTTGCTAATTCTCTCTGT		ENST00000514769
CUST_116320_PI430048170	0.00505	0.000503	2.93255	ncRNA	lnc-RP11-408E5.4.1-19:1	lncipedia	18485117	18486350				CAGCTGGTAAATGTCCCCAAGGTACTCAATAATAAAGAGAAAAATAACTTTACAGTGGAA		lnc-RP11-408E5.4.1-19:1
CUST_143139_PI430048170	9.03e-06	5.2e-08	-2.48846	mRNA	NM_023926	RefSeq	58083841	58098363	ZSCAN18	zinc finger and SCAN domain containing 18%2C transcript variant 3		TTTACCTCGCGTGTGTTTACCTATATGGAGTAGCTCGCAGAGATCACAGAAATGCTTGCA	NM_023926
CUST_7444_PI430048170	0.000576	2.59e-05	2.92722	ncRNA	NR_026774	RefSeq	101730436	101732525	LINC00239	long intergenic non-protein coding RNA 239		ACACTGTGTTTCTAATGGGTACTGGGATCAAAATAATAAAAACTCAGTCTGCAAAGGGAG	NR_026774
CUST_143222_PI430048170	9.16e-06	5.3e-08	-2.71975	mRNA	NM_001145399	RefSeq	30384492	30586383	MPPED2	metallophosphoesterase domain containing 2%2C transcript variant 2		ACACAGGCACATACAGGGCACACTGGTATGGCTTGTCATTTTGTGACAAATTCTTGTCAG	NM_001145399
CUST_51014_PI430048170	0.00433	0.000408	2.90822	ncRNA	ENST00000559672	ENSEMBL_GENCODE	51315841	51321996	RP11-108K3.2			AAAGGAAGAGAAACCCATCAACATCCTGTTAACTAAACGGAGAGAAATGCTGTTTAGGGG		ENST00000559672
CUST_6522_PI430048170	9.59e-06	5.58e-08	-2.74644	ncRNA	NR_027992	RefSeq	20669467	20756151	NBEAP1	neurobeachin pseudogene 1		CACCTGCAAAGGTTCAACTTTCCCTATATACATATTTGTCTGCTGAATTTATTGGAACTG	NR_027992
CUST_60214_PI430048170	6.78e-07	9e-10	2.90417	ncRNA	lnc-RNASEH2B-3:6	lncipedia	50401225	50409122				CACCCATGTGTGCAAGGATCGCTTTTTATGATTTATACAAACCAAAGCACTCATTGGAAT		lnc-RNASEH2B-3:6
CUST_113651_PI430048170	9.87e-06	5.77e-08	-2.47531	mRNA	NM_033655	RefSeq	39072766	39288303	CNTNAP3	contactin associated protein-like 3		TCCTCAGGGACAGAATTCAACGCCGTCAAATCTCTCATATTGGGAAAGGTTTTAGAGGCT	NM_033655
CUST_81506_PI430048170	9.91e-06	5.81e-08	-1.85257	mRNA	NM_001098537	RefSeq	137459951	137550569	PNPLA7	patatin-like phospholipase domain containing 7%2C transcript variant 1		TGAGGTGTGGGAGCCCTGATGCTGCCGTGTGATGTTTCAATAAAGGTGGATCTCACTGTT	NM_001098537
CUST_47187_PI430048170	5.18e-07	6.24e-10	2.90027	ncRNA	lnc-EPSTI1-3:3	lncipedia	42738255	42745372				GTCCACATCATTCCGTAGTTGTCTCTGAGATATGTCTATTTACAAGAAGATACTCTGAAA		lnc-EPSTI1-3:3
CUST_114688_PI430048170	9.97e-06	5.87e-08	-3.04101	ncRNA	lnc-TPPP-1:3	lncipedia	653581	656902			+	CCACTCACCTATCATGGTGCACAGCTTGTTCTATAAAAAACTCAATGACAAACTCAGTTA		lnc-TPPP-1:3
CUST_80802_PI430048170	0.00347	0.000303	2.89812	ncRNA	lnc-FAM27B-22:1	lncipedia	40735061	40746923				GTCCTGAAGAAGAACAGAGCTCAAGAATGTATACCATCAGATGTCTCCAACTTTATTACA		lnc-FAM27B-22:1
CUST_89175_PI430048170	0.00302	0.000252	2.89376	ncRNA	ENST00000444871	ENSEMBL_GENCODE	44931122	44938888	RP11-89K21.1		-	GGGGGCAAACACTATGTCCTTTTCTTTTTCTAGATACAGTTAATTCCTGGAAATTTTAGC		ENST00000444871
CUST_142328_PI430048170	1.02e-05	6.07e-08	-0.949677	mRNA	NM_001193489	RefSeq	48988638	49046563	SECISBP2L	SECIS binding protein 2-like%2C transcript variant 1		TGGGGGGTAATAACAGCTTTTTTGCACTATGTAAATACTAGTGGGGATTCTTCTGTACTA	NM_001193489
CUST_143971_PI430048170	1.02e-05	6.08e-08	1.9871	mRNA	NM_031894	RefSeq	31071240	31072053	FTHL17	ferritin%2C heavy polypeptide-like 17		GCCCTTTCAGAACGTTCTCTTCAGTTTTATCTTTCAGTTTTACCATTGTTAGCAAAAAAG	NM_031894
CUST_29299_PI430048170	0.000646	3.05e-05	2.87123	ncRNA	NR_110454	RefSeq	54918862	54928778	CRNDE	colorectal neoplasia differentially expressed (non-protein coding)%2C transcript variant 4		CCACTGGAAATGTTGAAATGAAAAATATTCAGCCGTTGGTCTTTGAAATTTCCTGTGATG	NR_110454
CUST_103399_PI430048170	0.0468	0.0104	2.86337	ncRNA	NR_120606	RefSeq	191425523	191590356	LINCR-0002	uncharacterized LincR-0002	+	AATGTAGAGCCACGAGATAAAAGCAGCTTGGATGGCTGACTCATATACAAGGACAACTGC	NR_120606
CUST_133926_PI430048170	1.03e-05	6.18e-08	1.4627	mRNA	NM_080660	RefSeq	139025705	139036029	ZC3HAV1L	zinc finger CCCH-type%2C antiviral 1-like		GTGGTCCACCATTGTTTTTCTATCAATTTATATTGTGGCAATCCTAGAGTACTTTGCACT	NM_080660
CUST_135755_PI430048170	1.03e-05	6.19e-08	-3.32618	mRNA	NM_015557	RefSeq	6101786	6180134	CHD5	chromodomain helicase DNA binding protein 5		GCCAACACAATCACCTTTACTTTGTACTCTGTGTGTATGTTTTGGTTTTCTGTGTTTTAA	NM_015557
CUST_28866_PI430048170	1.03e-05	6.2e-08	-1.84506	ncRNA	NR_110909	RefSeq	14009275	14016018	LOC101927311	uncharacterized LOC101927311		AAACCACAGTGACACGTGGATAAAACTCACGTTGTTGGGGGGAGAAGAGCAAAACATATG	NR_110909
CUST_53761_PI430048170	1.03e-05	6.22e-08	0.815565	ncRNA	lnc-ADC-1:2	lncipedia	32986951	32988233				ATTCATCAAGTTTCCCTATCAGGAGTTCACTGACCATCTCATCAAGACCCAGACCAGAGT		lnc-ADC-1:2
CUST_142773_PI430048170	1.03e-05	6.27e-08	-2.24597	mRNA	NM_175709	RefSeq	39130773	39152533	CBX7	chromobox homolog 7		GTAGAGCGCGGTTTTATTTTTGTACTGACATTGGTAAGAGACTGTATAGCATCTATTTAT	NM_175709
CUST_60143_PI430048170	1.04e-05	6.29e-08	-2.81402	ncRNA	ENST00000598084	ENSEMBL_GENCODE	46455135	46486506	LINC01198		-	CCTGTCTAAATCGACTGTGTGGTTTCTACTCATTATGGATATAGATTGATACAAACTCAA		ENST00000598084
CUST_138803_PI430048170	1.04e-05	6.33e-08	1.77406	mRNA	NM_000358	RefSeq	136028894	136063818	TGFBI	transforming growth factor%2C beta-induced%2C 68kDa		GGTAGAAAAGAAATGGTATGTAGAGCTTAGATTTCCCTATTGTGACAGAGCCATGGTGTG	NM_000358
CUST_54090_PI430048170	0.000235	7.56e-06	2.86228	ncRNA	lnc-HOOK1-7:6	lncipedia	59512315	59660423			+	CCCCAAGATACAGCACATGCTTTTGTGACAGAGATTCTTAATTAAAAGATTGTTTGCAAA		lnc-HOOK1-7:6
CUST_128320_PI430048170	1.04e-05	6.36e-08	-3.19759	mRNA	NM_000921	RefSeq	20369244	20684107	PDE3A	phosphodiesterase 3A%2C cGMP-inhibited%2C transcript variant 1		TGAAGGTAAAAGCTGTGCAAAAGGCATGAGACTCAGGCCTACTCTTTGTTTAAATGATGG	NM_000921
CUST_94042_PI430048170	1.04e-05	6.4e-08	0.77032	ncRNA	lnc-COG3-3:1	lncipedia	45436120	45436660				ATGACAACTTCATTCTAAAGCATACAGGTCCTGGCATCTTGTCCATGGCAAATGCTGGAC		lnc-COG3-3:1
CUST_98807_PI430048170	1.04e-05	6.43e-08	2.33683	mRNA	NM_004237	RefSeq	892853	918049	TRIP13	thyroid hormone receptor interactor 13%2C transcript variant 1		TGTTTCTGCCCACGGTTTTGTTTGTGCAATAACGTTATCACATTTCTAATGAGGATTCAC	NM_004237
CUST_112205_PI430048170	1.04e-05	6.43e-08	-1.76894	ncRNA	lnc-SLC25A6-2:1	lncipedia	1357024	1359402				TTCTGTGATTACAGGCTGCATTCTCTGCAACACAAAAGCAAGCAAACTTTTGAGTGTCTG		lnc-SLC25A6-2:1
CUST_29395_PI430048170	0.000153	4.06e-06	2.84487	ncRNA	ENST00000499966	ENSEMBL_GENCODE	66408524	66412135	LINC00920			CAGTAAGTGAAGACTCACTAGCAAATATATGAGTGATGGATCAAGAGAGACAAAGTGTTA		ENST00000499966
CUST_133468_PI430048170	1.04e-05	6.44e-08	4.2065	mRNA	NM_001007538	RefSeq	26044596	26051060	SHISA2	shisa family member 2		GTTGGCAATTGGTATCATCAATGATACTCATTTTTTAATAACCAAAGGCAGGGGAAAATC	NM_001007538
CUST_6124_PI430048170	1.04e-05	6.45e-08	-1.72079	ncRNA	NR_045636	RefSeq	74147980	74152389	BOLA3-AS1	BOLA3 antisense RNA 1 (head to head)%2C transcript variant 2	-	GTTGTATTGGTCCATGATCACTCATAGCTTTCATACACATATATACATCTGAAACTCAGA	NR_045636
CUST_131759_PI430048170	1.05e-05	6.51e-08	1.07447	mRNA	NM_004704	RefSeq	51933425	51941941	RRP9	ribosomal RNA processing 9%2C small subunit (SSU) processome component%2C homolog (yeast)		TTCCCAGGCTATGCCCCACCCTCTTTGTATTAAAAGCCTCCTCTTTTGGGCCTTAAAAAA	NM_004704
CUST_134753_PI430048170	1.05e-05	6.57e-08	-2.77636	mRNA	NM_153361	RefSeq	43192067	43280850	NIM1K	NIM1 serine/threonine protein kinase%2C transcript variant 1		CGATTTTATAAATTGCACTAGACTGCTTGTAACTAACCAAGATGATTGTTGCTGCTTCTA	NM_153361
CUST_136487_PI430048170	1.05e-05	6.58e-08	-2.665	mRNA	NM_022569	RefSeq	114827770	115113876	NDST4	N-deacetylase/N-sulfotransferase (heparan glucosaminyl) 4		AAGTGAGATAGCACTGGAGACAAGAACTAAGCCTCTCAAGATACTTTTAGTGCTAAAAAA	NM_022569
CUST_138206_PI430048170	1.05e-05	6.6e-08	-4.12839	mRNA	NM_203487	RefSeq	66302833	67230336	PCDH9	protocadherin 9%2C transcript variant 1		CCTTGTTACTGCTTTGCCAGTTCTACGTTATTTACAATTATTCAGCTCTTGCAATAAATG	NM_203487
CUST_144429_PI430048170	1.07e-05	6.74e-08	1.50225	mRNA	NM_001163812	RefSeq	100987535	100994401	C10orf2	chromosome 10 open reading frame 2%2C transcript variant 2		GACTGCTGGAGTCAGGACATTTTATAGAGCCTTTTCCAGTTTTACTAAAAAATTTTTCCA	NM_001163812
CUST_119941_PI430048170	2.26e-05	2.02e-07	2.84069	ncRNA	NR_109974	RefSeq	50082168	50528643	DLEU1	deleted in lymphocytic leukemia 1 (non-protein coding)%2C transcript variant 3	+	CCCCATGAAGGACCAAGTGAGCAGATAGAAGTTTCTCCATTTTAACTTTTTCTGAGTCAA	NR_109974
CUST_52073_PI430048170	1.08e-05	6.81e-08	-2.46579	mRNA	NM_024812	RefSeq	103140692	103230305	BAALC	brain and acute leukemia%2C cytoplasmic%2C transcript variant 1		AAGAATCACAAAGAACTGTGTCAACTAGCAGAGAGTCCAAGCAGAAGGGCAGATGGACTT	NM_024812
CUST_142247_PI430048170	1.09e-05	6.88e-08	-5.10558	mRNA	NM_002851	RefSeq	121873104	122062036	PTPRZ1	protein tyrosine phosphatase%2C receptor-type%2C Z polypeptide 1%2C transcript variant 1		CTCTACCAGTTTTCTGACATTGTATTGTGTTACCTAAGTCATTAACTTTGTTTCAGCATG	NM_002851
CUST_17534_PI430048170	1.09e-05	6.91e-08	-3.52442	ncRNA	ENST00000514571	ENSEMBL_GENCODE	88965875	89168668	MEF2C-AS1			CCAATAGATGGACCAAGAAGTACTCATCCTTGTAAACTTTCTTTGGATAAATTGCTTACA		ENST00000514571
CUST_127017_PI430048170	1.1e-05	6.99e-08	1.38924	mRNA	NM_003707	RefSeq	128080956	128123828	RUVBL1	RuvB-like AAA ATPase 1		CCGAGTGATGATAATCCGGACCATGCTGTATACTCCACAGGAAATGAAACAGATCATTAA	NM_003707
CUST_16770_PI430048170	1.1e-05	7e-08	-4.99727	ncRNA	ENST00000514431	ENSEMBL_GENCODE	173530515	173583169	HAND2-AS1		+	CTTCCGGATGACTTCTAGGGTTTTTGTGATTCTGTAATTCTAAAGGAGAAAGGATAATAA		ENST00000514431
CUST_21458_PI430048170	3.48e-06	1.1e-08	2.84069	ncRNA	NR_003367	RefSeq	127890627	128101253	PVT1	Pvt1 oncogene (non-protein coding)	+	TTCACTGAGGCTACTGCATCTTGAGACTCAGGATGAAGACCCAGCTTGGGGCTGTCAAAG	NR_003367
CUST_122174_PI430048170	0.0104	0.00133	2.82021	ncRNA	NONHSAT080770	NONCODE	62662582	62663718			+	GAAATGCTATGCAAACTTCATTTCTTAATCACTGATTGCTCGGCTGAAATTCTCGTGTTG		NONHSAT080770
CUST_127829_PI430048170	1.12e-05	7.19e-08	1.00639	mRNA	NM_007276	RefSeq	26201210	26213607	CBX3	chromobox homolog 3%2C transcript variant 1		GTTGGGAAATAAAAGTTTCATGTGATGCCTAGGGTCAATTGTCTCATTAAAATGAGGTTT	NM_007276
CUST_16261_PI430048170	1.12e-05	7.21e-08	-1.42705	ncRNA	ENST00000610225	ENSEMBL_GENCODE	86000327	86000766	RP13-514E23.2		+	GGGGACGCAAGAGTAAGAGATAAAGTGATTTTATTCACTTGAAATGCAAGAGACATACAA		ENST00000610225
CUST_108441_PI430048170	1.13e-05	7.31e-08	2.92788	mRNA	NM_017763	RefSeq	58352499	58417582	RNF43	ring finger protein 43		TTTTTGAGCAGGATCTGTAAAAGCATAATTGAATTTGTTTCACCCCCGTGGATTCCAGTG	NM_017763
CUST_109162_PI430048170	0.000114	2.59e-06	2.80741	ncRNA	lnc-C10orf113-1:1	lncipedia	21146823	21147679			-	TTCGACAGCTGTTTAGTCAGATAATTGTGTCCGAATTGATTATGAAAATAATAGACCAGC		lnc-C10orf113-1:1
CUST_140138_PI430048170	1.14e-05	7.37e-08	-3.2428	mRNA	NM_001135170	RefSeq	15339935	15446167	C1QTNF7	C1q and tumor necrosis factor related protein 7%2C transcript variant 1		CATGCACAAGGGTATTTCCAGGTCATTTATCATTGTGAACAGTGTTGCTTATGATAAAAA	NM_001135170
CUST_96236_PI430048170	2.69e-07	2.18e-10	2.80626	ncRNA	lnc-DTX2.1-2:1	lncipedia	76417792	76418293				TGCTATTTTTTTAAAACACCTACTGAATATCTGAGTGAGTCCATAAAGTCCTTAAGATGG		lnc-DTX2.1-2:1
CUST_73362_PI430048170	1.15e-05	7.47e-08	0.789921	mRNA	NM_024638	RefSeq	114056734	114088421	QTRTD1	queuine tRNA-ribosyltransferase domain containing 1%2C transcript variant 1		AGGTAGTTAATGGCTGTCGCCTAGGAAAAATAAAAAACCTGGGCAAAACAGGGGACCACA	NM_024638
CUST_143853_PI430048170	1.15e-05	7.51e-08	-1.04037	mRNA	NM_001304349	RefSeq	14091694	14108390	PRKACA	protein kinase%2C cAMP-dependent%2C catalytic%2C alpha%2C transcript variant 3		GACGAGACTTCCTCTTGAACAGTGTGCTGTTGTAAACATATTTGAAAACTATTACCAATA	NM_001304349
CUST_100294_PI430048170	1.16e-05	7.58e-08	1.1617	mRNA	NM_001242795	RefSeq	56781791	56844949	NUP93	nucleoporin 93kDa%2C transcript variant 2		GAGATGGCCTATGCGCGGCAAATTTATATCTATAATGAGAAAATTGTAAATGGACACCTG	NM_001242795
CUST_116276_PI430048170	4.44e-05	5.91e-07	2.78596	ncRNA	lnc-RNASEH2B-3:51	lncipedia	50492643	50512893				CAAGTTTCACTTCAGGCTACTTTAAACATTTGCTTTATTCCAAAACAGCTAAACTTGGAG		lnc-RNASEH2B-3:51
CUST_46894_PI430048170	1.18e-05	7.78e-08	0.823278	ncRNA	lnc-PPP1R12C-1:1	lncipedia	55119249	55120383				TGAGTCGCCGGATGTTTCAATGCCTCATGATACAATAAAACCACAAAAATTTTCGTAACA		lnc-PPP1R12C-1:1
CUST_38886_PI430048170	1.18e-05	7.8e-08	-1.65497	ncRNA	lnc-STAT6-1:3	lncipedia	57083311	57087834				GTTGTTTTGAGCAGTGTCCTCATTAAAACAAAGCTAAAAGCTTCTTGAATGACTATCTTG		lnc-STAT6-1:3
CUST_80721_PI430048170	1.19e-05	7.86e-08	-3.39305	ncRNA	lnc-ANKRD18A-9:1	lncipedia	39173793	39174513			-	CAACAGACACAGGTTTTCATATACATTCCATGTTATTCTGAATTACTGATGGGTTCACTG		lnc-ANKRD18A-9:1
CUST_131566_PI430048170	1.19e-05	7.89e-08	1.35341	mRNA	NM_025236	RefSeq	1369184	1374770	RNF39	ring finger protein 39%2C transcript variant 1		TTTTGGGTTATTTATTTTGTGCATCTGTGGCAATAAATGAGATCTCAGTGGTGGTATGGA	NM_025236
CUST_116897_PI430048170	1.19e-05	7.9e-08	-2.27376	mRNA	NM_020318	RefSeq	176463170	176842834	PAPPA2	pappalysin 2%2C transcript variant 1		GGAGAATGAAAGTTAAGTACCAGCTTGCATTTTTGTGCCCCTAGATTATTTTTGCATTTT	NM_020318
CUST_135409_PI430048170	1.19e-05	7.91e-08	1.13541	mRNA	NM_001195124	RefSeq	87302798	87317420	C16orf95	chromosome 16 open reading frame 95%2C transcript variant 1		GTTTCTGTTATGAATGTGGTCAATAAATGTTATTTGTGAAACTCTAAACTGGCCACCTCT	NM_001195124
CUST_135278_PI430048170	1.19e-05	7.96e-08	-1.67965	mRNA	NM_004070	RefSeq	16021990	16034050	CLCNKA	chloride channel%2C voltage-sensitive Ka%2C transcript variant 1		GAAAACCAGTATCTGCCAGGTGCTCAGTGACTGGCCATCACATTAATGAATGACGAGATT	NM_004070
CUST_141226_PI430048170	1.19e-05	7.96e-08	-5.2546	mRNA	NM_153370	RefSeq	36954432	36964837	PI16	peptidase inhibitor 16%2C transcript variant 1		GAGGGAAGGAAAGTAACTCCTGACTCTCCAATAAAAACCTGTCCAACCTGTGGCAAAAAA	NM_153370
CUST_121083_PI430048170	1.19e-05	7.96e-08	3.67174	mRNA	NM_004852	RefSeq	57435684	57491298	ONECUT2	one cut homeobox 2		GCAACATCGCTTACACTGGATTCTTTCTATTTTTATTCCTATCATTAAATGGTAGTGCTG	NM_004852
CUST_98778_PI430048170	1.19e-05	8.03e-08	-3.96265	ncRNA	lnc-MYOZ2-3:1	lncipedia	119006031	119006401			+	TTTGTGTCCATAACCCAAACACCAAAGAATCTTCTAGCTGTGGAGAAAGACCCCAAAACT		lnc-MYOZ2-3:1
CUST_21389_PI430048170	0.00142	9.06e-05	2.78519	ncRNA	ENST00000517482	ENSEMBL_GENCODE	124271683	124277584	RP11-383J24.1			TGGAGAGACCAAGTTTCAGCAGCCACTAAGCTGTCAAGGCTCTTTAAAAATCTGATTCCT		ENST00000517482
CUST_25883_PI430048170	0.0266	0.00476	2.77901	ncRNA	ENST00000611525	ENSEMBL_GENCODE	130138693	130140768	RP11-143E21.3			ACTCCAATCACCAAGCATTTTTGGAAAACCAAATCAAAGCTAGATGGCTTTTCTAACATG		ENST00000611525
CUST_75480_PI430048170	8.78e-06	4.69e-08	2.77134	ncRNA	lnc-GPBP1-5:1	lncipedia	57422463	57424391				TGTGGAAAAACCATGTGCTACTGACAGCATTCCCAAAACCAGTTTCCTCACTTCCTGGAA		lnc-GPBP1-5:1
CUST_70741_PI430048170	1.21e-05	8.17e-08	-1.3957	ncRNA	lnc-RBM44-1:1	lncipedia	237771981	237780309			+	CAGTGTTGGGACTTCCTTTCATGGCAGAATCTACAATTTGAGCGACTTCAGTAGTATCTC		lnc-RBM44-1:1
CUST_145274_PI430048170	1.21e-05	8.19e-08	-2.7808	mRNA	NM_000316	RefSeq	46877745	46903799	PTH1R	parathyroid hormone 1 receptor%2C transcript variant 1		TCATATACTGTTTCTGCAATGGCGAGGTACAAGCTGAGATCAAGAAATCTTGGAGCCGCT	NM_000316
CUST_106885_PI430048170	1.25e-05	8.49e-08	1.27742	mRNA	NM_001242841	RefSeq	3357926	3379222	ZNF195	zinc finger protein 195%2C transcript variant 4		CAAGATGCATTCCCAAAAAGAATACTGAGAGGATATGGAAATTGTGGCCTTGATAATTTA	NM_001242841
CUST_119935_PI430048170	6.46e-05	1.08e-06	2.76942	ncRNA	NR_109974	RefSeq	50082168	50528643	DLEU1	deleted in lymphocytic leukemia 1 (non-protein coding)%2C transcript variant 3	+	CATGAAGGACCAAGTGAGCAGATAGAAGTTTCTCCATTTTAACTTTTTCTGAGTCAATTT	NR_109974
CUST_94975_PI430048170	1.27e-05	8.69e-08	-1.91682	mRNA	NM_175929	RefSeq	101720854	102401774	FGF14	fibroblast growth factor 14%2C transcript variant 2		GAACGCATATGCTGCAGTGTCTTTGTGGCAAGAGTCTTAAGAAAAACAAGAACCCAACTG	NM_175929
CUST_98461_PI430048170	1.27e-05	8.74e-08	1.16201	mRNA	NM_022662	RefSeq	111767636	111884164	ANAPC1	anaphase promoting complex subunit 1		ACTAGAAGGGAGCACAAGCTTTGCTGAACTGCTCTTCAAATTTAAGCAGCTAAAAATGCC	NM_022662
CUST_97172_PI430048170	1.29e-05	8.84e-08	-1.70262	ncRNA	lnc-PPARGC1A-5:1	lncipedia	24144890	24156994				CATTTTCTCTCTTTCCCTTTCAGGTAGTTCTGAACAATAAAAGCCACCAACCATTAAAAA		lnc-PPARGC1A-5:1
CUST_63721_PI430048170	0.0389	0.008	2.76502	ncRNA	NR_034100	RefSeq	6925473	6929869	LINC00668	long intergenic non-protein coding RNA 668		CCACCGAATTTCAAGAGCCCAAGCACAGAGCCCAGAACTAAATTGTGAGGGTTTAAAAAA	NR_034100
CUST_10624_PI430048170	1.3e-05	8.96e-08	0.878383	ncRNA	ENST00000444682	ENSEMBL_GENCODE	26170194	26171373	RP11-96L14.7		+	ATACCTTTTCTTGTGGTCTTTGGATCGGAAGTGGGTCTTCAGGTTGGTGGAATCGATGAA		ENST00000444682
CUST_50535_PI430048170	2.28e-05	2.06e-07	2.76498	ncRNA	ENST00000433644	ENSEMBL_GENCODE	95414834	95426796	RP11-435O5.2			TTTCAATAGTCCAGACAGCTTCCAACCAAAGATGTGGAGGCACAATCTTTGCCTGGTAGA		ENST00000433644
CUST_135560_PI430048170	1.3e-05	9.04e-08	-3.17896	mRNA	NM_001288819	RefSeq	82543200	82647605	CPEB1	cytoplasmic polyadenylation element binding protein 1%2C transcript variant 5		GGAATGTATGAGATAACAGTTGCAGTTGACTGAAATGCCACTGGAATTTGAAAACTTGAC	NM_001288819
CUST_40264_PI430048170	1.3e-05	9.04e-08	-2.74343	ncRNA	lnc-C15orf2-6:4	lncipedia	24385548	24393655				CTTCCGAGAAGATTGTAGCAGTAATTCAGGTGCTATTATTTGGGACATTTATAATTCGAT		lnc-C15orf2-6:4
CUST_52844_PI430048170	0.000463	1.9e-05	2.74953	ncRNA	lnc-CFTR-1:1	lncipedia	117689712	117715971			-	TAACCCAGAAATACCAGCTGAGTAGGAGAAGAGAAAAGGCATCAGCCAGTCAAGGTTTCA		lnc-CFTR-1:1
CUST_132589_PI430048170	1.32e-05	9.18e-08	4.03318	mRNA	NM_002288	RefSeq	485126	493014	LAIR2	leukocyte-associated immunoglobulin-like receptor 2%2C transcript variant 1		CTTCAATGGGGAGAAATAATTAGAATGAGCAATAGAAATGCACAGATGCCTATACATACA	NM_002288
CUST_88911_PI430048170	1.33e-05	9.29e-08	0.999951	ncRNA	lnc-AMFR-6:1	lncipedia	56439126	56439735			-	ATTGGTAACTGGTGGAGACCAAATTTTGAACCTCCTCAGGAAAATGTAAAACAAATACAA		lnc-AMFR-6:1
CUST_91413_PI430048170	1.34e-05	9.38e-08	1.19633	mRNA	NM_005886	RefSeq	57735747	57757250	KATNB1	katanin p80 (WD repeat containing) subunit B 1		TCAGCAGGGAGGAGAGGCTGCATAAGTGCCGGCTCTGCTACAAGCAGCTTAAGAGCATCA	NM_005886
CUST_132777_PI430048170	1.35e-05	9.44e-08	-2.61546	mRNA	NM_021219	RefSeq	25639281	25717562	JAM2	junctional adhesion molecule 2%2C transcript variant 1		ACTTTGCAAAGAACTTCCTTTTTCCACAGGTGGCTTTGTTCGATTAAAGTCTACACTAAT	NM_021219
CUST_72433_PI430048170	1.36e-05	9.58e-08	-0.695319	mRNA	NM_001199579	RefSeq	38734713	38756019	SUN2	Sad1 and UNC84 domain containing 2%2C transcript variant 1		AGACAGTCCTCTCAGGACCTTGAAGAGGAAATCCAGCAACATGAAGCGCCTGTCCCCAGC	NM_001199579
CUST_30965_PI430048170	4.29e-05	5.58e-07	2.72849	ncRNA	ENST00000577281	ENSEMBL_GENCODE	72425939	72428852	RP11-57A1.1			ATGTCTGAATTCACTGAATGGGATGACATATGAGGAACATCTAGTGCCATGTCTGGTCCC		ENST00000577281
CUST_130871_PI430048170	1.38e-05	9.73e-08	-3.86628	mRNA	NM_031950	RefSeq	15960239	15963236	FGFBP2	fibroblast growth factor binding protein 2		GTAACGCATTCATGAATTTCCAGTGTTCAGTAAATAGCAGCTATGTGTGTGCAAAATAAA	NM_031950
CUST_58310_PI430048170	1.39e-05	9.83e-08	3.1996	mRNA	NM_012101	RefSeq	120111285	120138155	TRIM29	tripartite motif containing 29		AAGGAGACCACCCAGAAGAATTTCAACAATCTCTATGGCACCAAAGGTAACTACACCTCC	NM_012101
CUST_16280_PI430048170	0.0389	0.008	2.71168	ncRNA	ENST00000507916	ENSEMBL_GENCODE	89627784	89720172	RP11-115D19.1			GTACATTTGTTGTTCTGGCATAAAGTAGAAATTGTCAGGTAAACATTGCTTCCTTTTGGA		ENST00000507916
CUST_134525_PI430048170	1.41e-05	1e-07	-4.00815	mRNA	NM_030820	RefSeq	56056589	56247580	COL21A1	collagen%2C type XXI%2C alpha 1		GGAAATAAAGCTAATGCTCTAGTTGAAAGAAAAGGAAAACTCCTGAAATCCTAGAATGTC	NM_030820
CUST_60253_PI430048170	2.49e-05	2.42e-07	2.70963	ncRNA	lnc-VPS36-2:1	lncipedia	52475580	52475812			+	TGTGTCTTAGTATTCGAAGTGAGTCATTCTATAGAATTTTTGACTAATCTGAGAAAGGCC		lnc-VPS36-2:1
CUST_136688_PI430048170	1.42e-05	1.01e-07	2.65399	mRNA	NM_001827	RefSeq	89311194	89316703	CKS2	CDC28 protein kinase regulatory subunit 2		TCTTCCAGTCAGTTTTTCTCTTAAGTGCCTGTTTGAGTTTACTGAAACAGTTTACTTTTG	NM_001827
CUST_141495_PI430048170	1.44e-05	1.04e-07	-2.50863	mRNA	NM_205853	RefSeq	52833114	52835219	MUSTN1	musculoskeletal%2C embryonic nuclear protein 1		CCAGCACCTTGGAAGCACCAATAAAGAGGATGCCCACGTGGCCCCAGCAATCAGAAAAAA	NM_205853
CUST_20833_PI430048170	0.00351	0.000308	2.70414	ncRNA	ENST00000521188	ENSEMBL_GENCODE	51961458	52022974	RP11-546K22.1			GGAGGAAACTGACACACTTTTCTTAAATGATGGAATAAAGTACTGACTGTGTTTCAAGCA		ENST00000521188
CUST_67630_PI430048170	0.000351	1.29e-05	2.70321	ncRNA	lnc-C10orf107-3:1	lncipedia	60787670	60791927			+	ACCTATCAGAGTATATACACATGAGGCAATAACACTCTGGTACAGATCTCCAGAAGTATT		lnc-C10orf107-3:1
CUST_18777_PI430048170	1.46e-05	1.05e-07	-2.49583	ncRNA	ENST00000624429	ENSEMBL_GENCODE	71386852	71390829	RP3-331H24.6			GGAGACAGATTAGACTGGATTCGGAGTCTTGATTTTGCAAAGGTAACAAAAGACATGTTT		ENST00000624429
CUST_123427_PI430048170	1.46e-05	1.05e-07	-2.35908	ncRNA	NONHSAT101216	NONCODE	42485709	42485831			+	GGAGATTAGAAGCCAGCTCACAAGAAGACTTAATTTGGAAAGATATGTAACCAACTTCAC		NONHSAT101216
CUST_133136_PI430048170	1.47e-05	1.06e-07	1.83785	mRNA	NM_001135055	RefSeq	53224706	53256114	TKT	transketolase%2C transcript variant 2		TATAAGGTCAACTGTGCAAAACCTTATACTGGCCAAGAACAAACTAGTGCTGGGGGAGGA	NM_001135055
CUST_142474_PI430048170	1.47e-05	1.07e-07	1.0395	mRNA	NM_024662	RefSeq	34105563	34146911	NAT10	N-acetyltransferase 10 (GCN5-related)%2C transcript variant 1		GCTCGCAGGGGTGAGGGGAAGGATAGAGAATCTATTTTTAATAAATAACATTCTAGAAAG	NM_024662
CUST_37976_PI430048170	1.47e-05	1.07e-07	0.9209	mRNA	NM_017914	RefSeq	1275520	1279244	C19orf24	chromosome 19 open reading frame 24		AACACCTTCTCGCCGGGCTGGGAACAATAAATGCAGCCATGTCTCTGCAGCTGGTGCTGA	NM_017914
CUST_137967_PI430048170	1.49e-05	1.08e-07	-2.41606	mRNA	NM_175861	RefSeq	29500812	29784759	TMTC1	transmembrane and tetratricopeptide repeat containing 1%2C transcript variant 2		CCATAAAGTATTTCTCCCATTGAGTCTAATGATGTATACTTTGCCTAGGTCTTTCCAAAA	NM_175861
CUST_120073_PI430048170	0.000213	6.64e-06	2.70315	ncRNA	ENST00000603308	ENSEMBL_GENCODE	15796959	15798346	LL22NC03-N64E9.1			GCAGAATGGTCAGACTACCATGCACTGTTAAATTTGATTTCAAGAAATTACAGGAAAACT		ENST00000603308
CUST_95634_PI430048170	1.49e-05	1.09e-07	-3.16615	ncRNA	lnc-ATXN7-8:11	lncipedia	65018342	65022584				TTTGAAAGCAGTCACTGGAAGCAAAGCTATGTGACTCAGCTTTGGTGATGTACTCCAGCT		lnc-ATXN7-8:11
CUST_91397_PI430048170	0.000182	5.16e-06	2.67728	ncRNA	lnc-CBX2-4:1	lncipedia	79778162	79779739			+	ACAGCCATACTTGCAAAAACCAACTTTTTCAGTTGCTTCAGATAAAGATGTTATAGCTTC		lnc-CBX2-4:1
CUST_135352_PI430048170	1.5e-05	1.1e-07	-4.18186	mRNA	NM_022648	RefSeq	217799788	217944073	TNS1	tensin 1		CTCCTGTACAGCTGCTTTGTTTCTTTGCAATGCATTGTATGGCTTTATAAATGATAAAGT	NM_022648
CUST_90646_PI430048170	0.000157	4.2e-06	2.67595	ncRNA	lnc-ADAMTS18-8:1	lncipedia	76878273	76878936				GTTGTACCTGAAAAAATGGGAAGAGGAGTGACCAATTCTGAGGAAGTCTGTCTTTCTGCA		lnc-ADAMTS18-8:1
CUST_21432_PI430048170	0.00112	6.51e-05	2.66958	ncRNA	NR_117099	RefSeq	127244636	127392631	CASC21	cancer susceptibility candidate 21 (non-protein coding)		TGTGGTTCCTGTTGGCCTTTTAACTGATGTGATGAAATAAAGTCTTCCATAATTTGACAA	NR_117099
CUST_56255_PI430048170	1.51e-05	1.12e-07	-1.83849	ncRNA	lnc-C10orf10-2:2	lncipedia	44827284	44959689			+	GATGCGTGTGTGATGGCCTTCACCATTTATATTGTTTTAAACTTGCTAAGCACTAGTTAA		lnc-C10orf10-2:2
CUST_143002_PI430048170	1.51e-05	1.12e-07	-2.4026	mRNA	NM_023943	RefSeq	133038287	133397775	TMEM108	transmembrane protein 108%2C transcript variant 1		AGACTCTTCAACCCACAAAGAAGCAACTAAATGTTTCTCTAAGTTTAATTTTCTAGCGTG	NM_023943
CUST_93477_PI430048170	1.51e-05	1.12e-07	0.991655	mRNA	NM_018224	RefSeq	43639246	43729541	COA1	cytochrome c oxidase assembly factor 1 homolog (S. cerevisiae)%2C transcript variant 1		TCCCAAGCCTGGAAGAACTCGTCATGCTCTTTGTAGCGTGGTGCTTCTGTTGCTCACAGG	NM_018224
CUST_137179_PI430048170	1.51e-05	1.13e-07	-3.90154	mRNA	NM_001290294	RefSeq	95311772	95561420	SORBS1	sorbin and SH3 domain containing 1%2C transcript variant 8		GAGCATGTCCTATGCAGACATAGATTTTTCTGTTCATTTATTTTTCTTCATTGCAGTGGA	NM_001290294
CUST_67126_PI430048170	4.68e-05	6.44e-07	2.66792	ncRNA	lnc-TPCN2-11:5	lncipedia						GTTTTCTAATGTTTTATAACTTATTGGTATGGTAGATGTACATGTATACAAATTAAAAGA		lnc-TPCN2-11:5
CUST_143536_PI430048170	1.51e-05	1.13e-07	0.865449	mRNA	NM_005796	RefSeq	67846915	67871316	NUTF2	nuclear transport factor 2		TTGATAATGATAGAACCCAACTAGGCGCAATTTACATTGACGCGTCATGCCTTACGTGGG	NM_005796
CUST_92435_PI430048170	1.51e-05	1.13e-07	-2.65478	ncRNA	lnc-GABPA-8:4	lncipedia	25712018	25714889			+	CACAAGGCTTCACACTGATGTTTTGTTGCATGACTTTCTCTGTGAATATTGTCTGTAAAT		lnc-GABPA-8:4
CUST_103483_PI430048170	1.13e-05	7.34e-08	2.66557	ncRNA	lnc-TMEM207-2:1	lncipedia	190310168	190313218			-	TGTTGGTCCAAGCATATTTTTACATGTTTTAAAATGTTTTCTGCCAGGCACATTGCAAGC		lnc-TMEM207-2:1
CUST_80759_PI430048170	1.51e-05	1.14e-07	-3.44814	ncRNA	lnc-RP11-160N1.10.1-6:1	lncipedia						TTGTGTTGATGTTTGCTTCTCATGGGACATCTAATAGGTTAACCAGAGCGCAAAGAAACA		lnc-RP11-160N1.10.1-6:1
CUST_79407_PI430048170	1.51e-05	1.14e-07	0.811432	ncRNA	lnc-DNAJB6-6:1	lncipedia	157158991	157192477			+	CTTTTAAGCTTGTTAAGAAATAGTAAGAGAAGGGGCTTCCTTTTCGATCCGCCATCTGCG		lnc-DNAJB6-6:1
CUST_94082_PI430048170	1.52e-05	1.15e-07	-1.5481	mRNA	NM_183357	RefSeq	123282295	123448545	ADCY5	adenylate cyclase 5%2C transcript variant 1		TCTCATTTTCTCCTGCACCAACATCGTGGGTGTCTGCACCCACTATCCGGCTGAGGTCTC	NM_183357
CUST_119971_PI430048170	0.00201	0.000145	2.65808	ncRNA	lnc-MZT1-5:1	lncipedia	71857061	71860153			-	GGGCCACAGGACAAATAACTTAGGAAAATACAATTGGCTTTAATTTTACCTTTTTGTAGC		lnc-MZT1-5:1
CUST_27317_PI430048170	1.56e-05	1.18e-07	-0.798732	mRNA	NM_001282463	RefSeq	96039323	96093971	C14orf132	chromosome 14 open reading frame 132%2C transcript variant 1		ATCATAGCTACGCTGGGGAACATCGTGGTGGTGGGCGTGGTGTATGCCTTCACCTTCTGA	NM_001282463
CUST_18357_PI430048170	0.000852	4.48e-05	2.6562	ncRNA	NR_033910	RefSeq	10412317	10416169	TFAP2A-AS1	TFAP2A antisense RNA 1	-	CCCGTGCAATTTTATTAGAAATCATTATCCCTTTCGCAATTAAACATAACCACCAAACCA	NR_033910
CUST_133705_PI430048170	1.57e-05	1.2e-07	-2.66112	mRNA	NM_001083	RefSeq	119494394	119628826	PDE5A	phosphodiesterase 5A%2C cGMP-specific%2C transcript variant 1		CTGTCAGTGGTTTCCTCATTTTGCCATGCTTTGTAAAAATAAAAAGAATGATCAAGTAGG	NM_001083
CUST_38199_PI430048170	1.57e-05	1.2e-07	-3.18727	ncRNA	lnc-ELMOD3-1:1	lncipedia	85287637	85292444			+	GGAGCATAAGACTGGTGGAGTGTTTAAGAGGATTTAACTTTCTGTGATGTTTTATTTAAG		lnc-ELMOD3-1:1
CUST_129844_PI430048170	1.58e-05	1.2e-07	-2.50916	mRNA	NM_001003793	RefSeq	29281311	30010395	RBMS3	RNA binding motif%2C single stranded interacting protein 3%2C transcript variant 1		TGGGCTTTCTGTAGATCAGTGGATGTTAGGTTTAAACTTCTGTTTTCTTTGATGAAGCTT	NM_001003793
CUST_13556_PI430048170	1.58e-05	1.21e-07	-3.97522	ncRNA	ENST00000609697	ENSEMBL_GENCODE	127625997	127626848	RP11-286H15.1		+	AGTGGCTGGGTACTATTCATATACTGGCTTTGGGAATGTAATAAATGCATCAAATCTGAA		ENST00000609697
CUST_36477_PI430048170	1.59e-05	1.22e-07	0.966396	ncRNA	ENST00000578149	ENSEMBL_GENCODE	56432379	56432442	AL137008.1			TTCTCCTGGGGCTTCGGTGGCTATGGCCGGCTCGGCCACGCAGAGCAGAAGGACGAGATG		ENST00000578149
CUST_129499_PI430048170	1.59e-05	1.22e-07	1.41397	mRNA	NM_001145526	RefSeq	78187316	78207701	AFMID	arylformamidase%2C transcript variant 1		CCCATCTACCTGCTGACAGAGCATGACAAAGATGACGCTCAAAAGTAATGCCATTACTTC	NM_001145526
CUST_88381_PI430048170	1.6e-05	1.23e-07	0.968833	ncRNA	ENST00000612313	ENSEMBL_GENCODE	120985692	121052167	CH17-118O6.3		-	AAGGACTTGCAGAGAGAGTTTTCTACTGGAATGTAAGAGGTTTTGAAGGCTCTCTTTTCT		ENST00000612313
CUST_75157_PI430048170	1.61e-05	1.24e-07	-1.79311	ncRNA	lnc-TPPP-1:3	lncipedia	653581	656902			+	ATTTGGTATGACACATTTTCCTGTTAGGACCACAACTGGACAGAGAGGTGACACAAGAGG		lnc-TPPP-1:3
CUST_112075_PI430048170	1.61e-05	1.24e-07	-2.8111	ncRNA	lnc-RP11-160N1.10.1-8:2	lncipedia						CCCCTGGGACCATTTCTTGTGTACTGCAATATGACAGATATTAGAAATGAACACTGCTTG		lnc-RP11-160N1.10.1-8:2
CUST_137275_PI430048170	1.61e-05	1.25e-07	1.03177	mRNA	NM_003132	RefSeq	11054591	11060034	SRM	spermidine synthase		TTTGAGTTCATGAAACAGAATCAGGATGCCTTCGACGTGATCATCACTGACTCCTCAGAC	NM_003132
CUST_85203_PI430048170	1.4e-05	9.96e-08	2.65397	ncRNA	lnc-FAM102B-2:1	lncipedia	108658704	108660043			-	CGTTTTTGTAAAGCGATACCTGAAAGAAATAGCTGCCTAGTTCAGAAGGGAAGAACGAAA		lnc-FAM102B-2:1
CUST_18772_PI430048170	1.62e-05	1.26e-07	-1.62805	ncRNA	NR_121614	RefSeq	71407864	71420745	LINC00472	long intergenic non-protein coding RNA 472%2C transcript variant 4		AAACTTTGCTTCAGGCTGGGTAGTGGTAGAGGTTTGAATTAAAATGTTTTCCTGTCAGTA	NR_121614
CUST_126585_PI430048170	7.32e-06	3.38e-08	2.64934	ncRNA	NONHSAT140266	NONCODE	96551380	96551517				TGAGCCAGAACCACATATTCTTCTCTTTAGACAACCTCTTCCAAAAGATCAACAAAAATG		NONHSAT140266
CUST_80849_PI430048170	1.66e-05	1.29e-07	-2.43418	ncRNA	lnc-AL353608.1-2:4	lncipedia	68355164	68357860			+	CACATTGTATACTGTTTTGCAATTGATTAAAGGCTTTGCATCTGTTTTTTCTTTGGAGGC		lnc-AL353608.1-2:4
CUST_136620_PI430048170	1.67e-05	1.3e-07	-2.0096	mRNA	NM_001282145	RefSeq	5890025	6228882	NLGN4X	neuroligin 4%2C X-linked%2C transcript variant 3		CCTTAAGTAATGATAGAAGATATATATGGCCGGACACATATGTATAAACTTTTCAGCAGC	NM_001282145
CUST_113693_PI430048170	1.68e-05	1.32e-07	-0.58719	ncRNA	lnc-DNAJB5-5:2	lncipedia	35016460	35017505				TCAAAATTTTATAAACAGGCTGGGCATGGTGGCTCATGCCTGCAAGACTCTGTCTCAAAA		lnc-DNAJB5-5:2
CUST_144380_PI430048170	1.68e-05	1.32e-07	-1.29242	mRNA	NM_001142651	RefSeq	172641265	172691530	NEURL1B	neuralized E3 ubiquitin protein ligase 1B		AAGGGTTTGCACTGGTCTTGAGTGTTGTGCTTTTCTGTGTTGTGTGTTTTGATTTTTGTC	NM_001142651
CUST_60212_PI430048170	3.76e-05	4.63e-07	2.64585	ncRNA	lnc-RNASEH2B-3:38	lncipedia	50390153	50530079				CACTGTAGTTTGGGAGGCCATATAAAACCAAATAACATTTTGAGTCATTAATGCCTCTTT		lnc-RNASEH2B-3:38
CUST_81899_PI430048170	1.71e-05	1.35e-07	-1.44826	mRNA	NM_005197	RefSeq	89156171	89417110	FOXN3	forkhead box N3%2C transcript variant 2		CTTTTCCCCAGACCTACCATAAAGTTTCTGTGATGTATTGTCTTCCAGTTGCAATAAAAA	NM_005197
CUST_136185_PI430048170	1.72e-05	1.35e-07	-2.11867	mRNA	NM_005076	RefSeq	205043211	205078043	CNTN2	contactin 2 (axonal)		TTCTTAAATAAAGATGGTTTCTCAACCTGTTGGGGAAGCTGGCACGAGCTGTGGGTGTTA	NM_005076
CUST_25219_PI430048170	1.72e-05	1.36e-07	-1.94265	ncRNA	NR_038269	RefSeq	165750	166448	LOC100506844	uncharacterized LOC100506844		AGAAGTTTGGCTGTCAAGGAAAACAGAGAATGTGCTAAAGAACATACAGACACAGAGCAG	NR_038269
CUST_142725_PI430048170	1.72e-05	1.37e-07	1.3406	mRNA	NM_031449	RefSeq	44748930	44769880	ZMIZ2	zinc finger%2C MIZ-type containing 2%2C transcript variant 1		TTTTCCCTGGAATTTTCCAAGTTGGCTTCAGCTGAAGAGCTGTTTTGTGAAGCATCCCAG	NM_031449
CUST_68017_PI430048170	1.74e-05	1.38e-07	0.720228	ncRNA	lnc-ADRA2A-3:1	lncipedia	111104955	111105248				AAGCTTAAGAAGAATCTAGAAGTCAGGATCTGGAAGAAGATCGAACATGCCGTGGTGATG		lnc-ADRA2A-3:1
CUST_144806_PI430048170	1.74e-05	1.38e-07	-5.21321	mRNA	NM_173495	RefSeq	23334867	23396801	PTCHD1	patched domain containing 1		CAGCACTTGAAATGAAGGCTTATGGAATTCTGACTGTGAAATGAATTTTTCTATTGGGAA	NM_173495
CUST_99620_PI430048170	1.74e-05	1.39e-07	-2.44184	ncRNA	lnc-POLR2B-13:1	lncipedia	61587367	61677392			+	CCAGGTCCAAGCAGATAAGAGGTGAAAATGAGCAATACAATTTTATATGTAATGTATAGC		lnc-POLR2B-13:1
CUST_61056_PI430048170	1.74e-05	1.39e-07	-1.12462	ncRNA	lnc-KIAA0247-1:6	lncipedia	69770880	69771915			+	TGGCTGTTTTCCATTTTAGGGTGGTTGAGTTTGCCTCTTATGGTGACTTAAAGAATGCTA		lnc-KIAA0247-1:6
CUST_10680_PI430048170	0.000304	1.07e-05	2.643	ncRNA	ENST00000435872	ENSEMBL_GENCODE	31571585	31575573	RP11-73M7.1		+	CCAAAATGTGAAGCGTTCTGAAGATATGCACATAGCGTAAGAACCTGGTGTAATGTGCTG		ENST00000435872
CUST_110209_PI430048170	1.76e-05	1.41e-07	1.11479	mRNA	NM_207346	RefSeq	75516527	75524739	TSEN54	TSEN54 tRNA splicing endonuclease subunit		GTCTATCCAGGAAGCTTACCAGCTGCTGCTGACCGACCACACTGTGACCTTCCTGCAGTA	NM_207346
CUST_96531_PI430048170	1.76e-05	1.41e-07	0.966898	ncRNA	lnc-PDPK1-1:1	lncipedia	2613743	2615385			+	TCTTAAGGGAGGTTTGCAGTCCCTAAATGCTTCAGGTGGCCACGTCAGGCGGCACAGACT		lnc-PDPK1-1:1
CUST_77467_PI430048170	0.000948	5.18e-05	2.63012	ncRNA	lnc-BCKDHB-4:1	lncipedia	80037552	80040271			+	ACCCAACTCGTTTTGCTGCAGTTGTGAAGAAATTTGATATATATATCTTAACGTTGTCAG		lnc-BCKDHB-4:1
CUST_100478_PI430048170	1.76e-05	1.42e-07	1.85086	mRNA	NM_182538	RefSeq	4433923	4488204	SPNS3	spinster homolog 3 (Drosophila)		CAGGGACCCCAGACAGCAATGATGTGGACAGCAACGACCTGGAGAGACAAGGCCTACTTT	NM_182538
CUST_16758_PI430048170	1.77e-05	1.43e-07	-5.63752	ncRNA	ENST00000616485	ENSEMBL_GENCODE	173530459	173539469	HAND2-AS1		+	AATCTTGGCTGCTGTTGAACAAAACTGTAATATTTACTTTGTTCTATACCGAGAAGCACT		ENST00000616485
CUST_43271_PI430048170	1.77e-05	1.43e-07	-1.91347	ncRNA	lnc-SERPINI1-9:1	lncipedia	164451244	164688010				GCTACATTCACAACAAATTCCTTTCCTTGAGGTTATTCTAATGGCTCCAATAAGAGAAAA		lnc-SERPINI1-9:1
CUST_128917_PI430048170	1.77e-05	1.43e-07	0.783817	mRNA	NM_178167	RefSeq	1997651	2009821	ZNF598	zinc finger protein 598		GCTGAATCTGGGATCTCAAATTGCCTCTGACCTTTTATAAGACAGTTTATCTTCAAATAA	NM_178167
CUST_131042_PI430048170	1.78e-05	1.44e-07	-1.80149	mRNA	NM_003216	RefSeq	41381928	41399328	TEF	thyrotrophic embryonic factor%2C transcript variant 1		GTGGGAGGGAAGCCGGGAATGTATCCTTTTCAGACAAAATTAAATATTTTGAAATGAGAA	NM_003216
CUST_24829_PI430048170	1.81e-05	1.47e-07	-2.59789	ncRNA	ENST00000616957	ENSEMBL_GENCODE	22104491	22105320	RP11-49G2.3		-	AGCACAGCTTCTGCTGTGGAGATGTGCAAGTTGGGAAATAAACGAAACATCATTATGTCC		ENST00000616957
CUST_112217_PI430048170	1.81e-05	1.47e-07	-4.61421	mRNA	NM_004010	RefSeq	31119227	33128427	DMD	dystrophin%2C transcript variant Dp427p2		ATATCAACGAGATGATCATCAAGCAGAAGCAACAATGCAGGATTTGGAACAGAGGCGTCC	NM_004010
CUST_122799_PI430048170	1.81e-05	1.48e-07	-3.77558	mRNA	NM_001063	RefSeq	133746132	133779006	TF	transferrin		AATCACGCTGTGGTCACACGGAAAGATAAGGAAGCTTGCGTCCACAAGATATTACGTCAA	NM_001063
CUST_84236_PI430048170	0.000189	5.57e-06	2.61041	ncRNA	NR_046242	RefSeq	66408523	66410900	LINC00920	long intergenic non-protein coding RNA 920		GCTGGAGGAGTAAGAACTATAAGGCTAATTGAAATGAATCTACTTAAAATAGTGACCTGA	NR_046242
CUST_35393_PI430048170	1.84e-05	1.51e-07	0.895732	ncRNA	ENST00000362696	ENSEMBL_GENCODE	47346166	47346297	SNORA64			TCTCCTAATCACAACAGACCTGCCCAGAAGGGCCTCTCTATTTCTAGGAGTATGATAGCT		ENST00000362696
CUST_81979_PI430048170	1.85e-05	1.52e-07	-5.10102	mRNA	NM_080390	RefSeq	102125687	102127712	TCEAL2	transcription elongation factor A (SII)-like 2		TCTTCAATGAAAATGAAGGAATGCCTTCGAATCAAGGAAAGATAGACAATGAAGAACAGC	NM_080390
CUST_8951_PI430048170	1.89e-05	1.55e-07	0.893177	ncRNA	NR_039678	RefSeq	138123757	138123821	MIR4468	microRNA 4468		TTCTCCTGGGGCTTTGGTGGCTATGGTTGACTGGGCCACTCAGAGCAGAAGGATGAGATG	NR_039678
CUST_118378_PI430048170	1.91e-05	1.58e-07	-2.1268	ncRNA	lnc-GNG5-8:1	lncipedia	83865722	83868153			-	CCTTTTAAACATTGGTTTTCCTTGCATTTTATGGTGGTGTGATTTTGCCTCAGCAATAAT		lnc-GNG5-8:1
CUST_138603_PI430048170	1.91e-05	1.58e-07	-2.46056	mRNA	NM_002718	RefSeq	135965672	136147910	PPP2R3A	protein phosphatase 2%2C regulatory subunit B''%2C alpha%2C transcript variant 1		TGTGTTTGGAGAAGGCTGCATGACTTTGTTTTTCCCTTTTAGCAAAACTAAATAAAGTTG	NM_002718
CUST_66126_PI430048170	1.93e-05	1.59e-07	-0.755363	mRNA	NM_016079	RefSeq	86503429	86563497	CHMP3	charged multivesicular body protein 3%2C transcript variant 1		CTGGTCAATGAGTGGTCATTGAAGATAAGAAAGGAAATGAGAGTTGTTGACAGGCAAATA	NM_016079
CUST_93426_PI430048170	1.95e-05	1.61e-07	2.06233	mRNA	NM_001012631	RefSeq	3065311	3069667	IL32	interleukin 32%2C transcript variant 1		ACACCCCAGAAGTGCTCTGAACCCCAATCCTCAAAATGAAGATACTGACACCACCTTTGC	NM_001012631
CUST_127726_PI430048170	1.95e-05	1.62e-07	3.49768	mRNA	NM_207413	RefSeq	52534036	52565461	FAM150A	family with sequence similarity 150%2C member A		CTGGTTAGCTGTTTCCTGTCATAGAATGGAGTCTTTCTTGCTTTATCTTTTTGTGTATAC	NM_207413
CUST_110569_PI430048170	1.96e-05	1.63e-07	1.09795	mRNA	NM_006062	RefSeq	73214237	73227227	SMYD5	SMYD family member 5		TGATGTACTGCAGTGCAGAATGTCGGTTGGCAGCCACTGAGCAATACCACCAGGTCCTGT	NM_006062
CUST_143902_PI430048170	1.99e-05	1.66e-07	1.2847	mRNA	NM_020445	RefSeq	152759748	152855379	ACTR3B	ARP3 actin-related protein 3 homolog B (yeast)%2C transcript variant 1		GTCGGTGAGTGTTGGATGAAATACTTCCTTGCACCATTGTAATAAAAGCTGTTAGAATAT	NM_020445
CUST_22087_PI430048170	0.00117	6.9e-05	2.59779	ncRNA	ENST00000433644	ENSEMBL_GENCODE	95414834	95426796	RP11-435O5.2			CTGATAAACCCATGGTAAAGTCAAAAAATCAGAAGATGCTTTTCAACTTACAATGGGGTT		ENST00000433644
CUST_144699_PI430048170	1.99e-05	1.67e-07	1.16746	mRNA	NM_007235	RefSeq	64404372	64448683	XPOT	exportin%2C tRNA		GTTTCAACGCCAATATGTATTCTACAAAAGAGAATGGTTTTAGGCTCCAGTGTTATACTT	NM_007235
CUST_120426_PI430048170	0.00489	0.00048	2.59469	ncRNA	ENST00000568861	ENSEMBL_GENCODE	41894985	41895943	RP11-23P13.6			GGTCGGAACAAAGTTTGGATTATTTATGTTGCAAGTAACTAAAATCTCAAGTGAAACTGG		ENST00000568861
CUST_114138_PI430048170	2.01e-05	1.68e-07	0.937717	ncRNA	lnc-DFNA5-5:3	lncipedia	24842375	24849336			-	TTAGAGATCGCTCCTGCAGGGCCCACTGCTGTGCTTTTCTGAAACATCCATTTATTAACA		lnc-DFNA5-5:3
CUST_60193_PI430048170	3.29e-05	3.65e-07	2.59024	ncRNA	lnc-RNASEH2B-3:30	lncipedia	50185879	50390291				AAGCTGCTTGGGTATCATTAATGAAGACAAAGTGGGATTATTATTTTCTATGATTTGGGC		lnc-RNASEH2B-3:30
CUST_134330_PI430048170	2.04e-05	1.72e-07	-1.94292	mRNA	NM_053064	RefSeq	51860303	51969800	GNG2	guanine nucleotide binding protein (G protein)%2C gamma 2%2C transcript variant 1		GAAAACCTGAATGTGATGTGCACATTTTCATCCCACATGGACAATGTATGTGTTTTAATA	NM_053064
CUST_77466_PI430048170	0.00128	7.84e-05	2.58523	ncRNA	lnc-BCKDHB-6:1	lncipedia	80005940	80011553			+	ATAGGAACAACAGTTGTGATTCCAGAGGACAGACTACTAAAGCCAGGTTTTTATATGGGT		lnc-BCKDHB-6:1
CUST_73790_PI430048170	2.04e-05	1.73e-07	-2.52754	mRNA	NM_181361	RefSeq	178536297	178844429	KCNMB2	potassium channel subfamily M regulatory beta subunit 2%2C transcript variant 1		TTAAAAATTAAGCGTGGCTTTTGAGGAAGATGTGACAACTACCGGAGGTCTTTTTGCCAT	NM_181361
CUST_32296_PI430048170	2.05e-05	1.73e-07	-1.36076	ncRNA	ENST00000595094	ENSEMBL_GENCODE	20553792	20661583	CTC-513N18.7		-	GGAGCAAGGAAGAAAACCTTTGACCATGAAGAGAAATGAGATGATAGCCAAACCCTCAGG		ENST00000595094
CUST_136605_PI430048170	2.05e-05	1.74e-07	-2.01727	mRNA	NM_001272071	RefSeq	15825805	15855014	AP1S2	adaptor-related protein complex 1%2C sigma 2 subunit%2C transcript variant 1		GAGTCTTCATGTACTTCATTAAAAAATAACATGGATTCCATACTGAGAGCCTATCTACAC	NM_001272071
CUST_142007_PI430048170	2.06e-05	1.75e-07	-1.3185	mRNA	NM_000633	RefSeq	63123345	63319380	BCL2	B-cell CLL/lymphoma 2%2C transcript variant alpha		CTTTGTTTGTGTTGTTGGAAAAAGTCACATTGCCATTAAACTTTCCTTGTCTGTCTAGTT	NM_000633
CUST_105277_PI430048170	2.06e-05	1.75e-07	1.52933	mRNA	NM_005772	RefSeq	4792833	4861077	RCL1	RNA terminal phosphate cyclase-like 1%2C transcript variant 1		CAAGTTCATACCTGATATCTATATTTACACAGATCACATGAAAGGAGTCAACTCTGGGAA	NM_005772
CUST_8776_PI430048170	2.06e-05	1.76e-07	-4.59619	ncRNA	NR_029686	RefSeq	149430645	149430733	MIR145	microRNA 145	+	AGGAATCCCTTAGATGCTAAGATGGGGATTCCTGGAAATACTGTTCTTGAGGTCATGGTT	NR_029686
CUST_24436_PI430048170	2.06e-05	1.77e-07	-2.58305	ncRNA	ENST00000534150	ENSEMBL_GENCODE	117833719	117837792	RP11-728F11.4		-	TAAAGGAGTGAAAGGAGTCCATGAAGAATGATGACAAAGTGCTGCAAACCTTCCCAGGTC		ENST00000534150
CUST_124868_PI430048170	2.06e-05	1.77e-07	3.24563	mRNA	NM_182762	RefSeq	20134655	20217390	MACC1	metastasis associated in colon cancer 1		CTGCCTAATTTGGGACTTTTTCTGCAGGATTGTAATGTAAAATAGTTCTTTAGCTCTTGG	NM_182762
CUST_138501_PI430048170	2.08e-05	1.78e-07	-2.6669	mRNA	NM_006614	RefSeq	196595	409414	CHL1	cell adhesion molecule L1-like%2C transcript variant 1		ATCAAAAGAGATGAAAGGTATGTAGAACAGGTTCACGTGATTACCTTTTTCTTTTGGCTT	NM_006614
CUST_127426_PI430048170	2.09e-05	1.8e-07	0.742827	mRNA	NM_001130912	RefSeq	52652695	52688298	SUGT1	SGT1%2C suppressor of G2 allele of SKP1 (S. cerevisiae)%2C transcript variant 1B		GAGATGCAGCTTTAAACAGATTATTTCAGCAGATCTATTCAGATGGTTCTGATGAAGTGA	NM_001130912
CUST_116304_PI430048170	8.99e-06	5.09e-08	2.58489	ncRNA	lnc-SGCG-8:1	lncipedia	23134173	23134564				ACCATCACAACTCCAGGAAGGAAACCAAGGGGCAGACCCACAAAACTGGAAAAGGAGGAA		lnc-SGCG-8:1
CUST_98892_PI430048170	2.09e-05	1.8e-07	0.911962	mRNA	NM_015315	RefSeq	154712901	154817607	LARP1	La ribonucleoprotein domain family%2C member 1		TTTGGACATTGACCCCAAACTGCAAGAATACCTCGGCAAATTCCGACGTCTTGAAGACTT	NM_015315
CUST_22869_PI430048170	2.1e-05	1.81e-07	-3.04071	ncRNA	ENST00000450677	ENSEMBL_GENCODE	59589150	59611248	RP11-135D11.2		+	CCTGATCTGGGACTTTTCCTGTCACTGGAACTGAAAAATAAATACATGTTGCATAAGCCA		ENST00000450677
CUST_144213_PI430048170	2.1e-05	1.82e-07	0.74563	mRNA	NM_152786	RefSeq	113410707	113429684	C9orf43	chromosome 9 open reading frame 43%2C transcript variant 1		GTAGGAGAAAAATCCCCAGCCTTTTTAAATTTAGATTATTTCCTTTCCATTAGGGTCAGA	NM_152786
CUST_42418_PI430048170	0.0204	0.00332	2.58191	ncRNA	lnc-LRRTM4-3:1	lncipedia	78018031	78290689				CTCTAGAAACTACATCCTGCTTTTGCATATATCAAGATTATTTTGGTGCCAAAAAGTAGG		lnc-LRRTM4-3:1
CUST_94319_PI430048170	1.08e-05	6.79e-08	2.5788	ncRNA	ENST00000610494	ENSEMBL_GENCODE	20699307	20703718	RP11-172H24.4		-	GAAATCTCCAGTTTAAGCGATTTAAGCAATTTACAGCTCTTGGCAAATATTTGTTTTGGG		ENST00000610494
CUST_140314_PI430048170	2.11e-05	1.84e-07	-1.62764	mRNA	NM_014819	RefSeq	109334708	109409974	PJA2	praja ring finger 2%2C E3 ubiquitin protein ligase		TTCTGTGACTTGGGAAATGCTTACATTCAGGCCTTAATGTTGCATTAGCTAGCATGTTTT	NM_014819
CUST_114063_PI430048170	2.12e-05	1.85e-07	0.923928	ncRNA	lnc-TMED4-1:1	lncipedia	44569751	44570765			-	TTAGGCAAGATTGAGGAGCTTCTCAGTGGAGGTAAGAGCCTGGCTCTTGTGGTCCTGGGC		lnc-TMED4-1:1
CUST_19238_PI430048170	0.000219	6.91e-06	2.55987	ncRNA	ENST00000472053	ENSEMBL_GENCODE	149852462	149853192	RP11-350J20.12		-	TGTGCCCCAGCAGACCTAGCTGCCAGCAGTGACAACATGCGTTACCTTCATGTCCACTGA		ENST00000472053
CUST_136252_PI430048170	2.16e-05	1.89e-07	-4.40243	mRNA	NM_001137560	RefSeq	44270742	44279445	TMEM151B	transmembrane protein 151B		GCGCAAAGATTGTACAAATCAAACTGGTGGATAATAAAGTCGTGGATGACTCACTGACAA	NM_001137560
CUST_119649_PI430048170	1.38e-06	2.79e-09	2.55765	ncRNA	NR_027358	RefSeq	52210929	52223813	LINC00592	long intergenic non-protein coding RNA 592	+	CCCCTTATACAAAACTTGGAGCTCAGACCACAAACAACAACAACAATCCAAAAAATAAAA	NR_027358
CUST_123570_PI430048170	0.0061	0.000644	2.55463	ncRNA	NR_051996	RefSeq	122436496	122479087	MGC32805	uncharacterized LOC153163	+	GCAAGTTGTTTAAAGAGGCAATTATCTCATGTGATTTATGAGATTTGCTGGACAAATTCC	NR_051996
CUST_106031_PI430048170	2.17e-05	1.91e-07	0.997439	ncRNA	lnc-CASK-5:1	lncipedia	41322600	41323111			-	TCCTCACCTGAAATTATGCTTCCTAAAATCTCAAGCCAAACTCGAAGAATGGGGTGGTGG		lnc-CASK-5:1
CUST_39316_PI430048170	2.19e-05	1.93e-07	0.89375	ncRNA	lnc-VSTM5-1:9	lncipedia	93731160	93736157			-	CTTGGTGAATTTTGAAGTCTTCATCAGTATATCCATATTAAAACGAGATGACAGAAGCCA		lnc-VSTM5-1:9
CUST_88363_PI430048170	2.21e-05	1.95e-07	-2.31047	ncRNA	lnc-PPARG-1:4	lncipedia	12148556	12191385			-	ATGACAGCAGTATGCCAAGCTTTGTGTTCATCTCCTAATAAACGTTAAGACCTTTGGTGT		lnc-PPARG-1:4
CUST_136679_PI430048170	2.22e-05	1.96e-07	-5.06103	mRNA	NM_018640	RefSeq	16548371	16606602	LMO3	LIM domain only 3 (rhombotin-like 2)%2C transcript variant 1		CAACAGAGTGCTGAGTTTAAAAGTTGACCTGTGTTTGTAATTTCACTTTCATCTTGCTTA	NM_018640
CUST_121440_PI430048170	0.00564	0.000582	2.54965	ncRNA	ENST00000565044	ENSEMBL_GENCODE	9106593	9109865	RP11-734K21.5			TAAAATGTGATCTATTAGCACAGCTAGGGACGTAGGACTATGCCTGTAATAGCAAAAGTA		ENST00000565044
CUST_127882_PI430048170	2.24e-05	1.99e-07	-2.61013	mRNA	NM_001278340	RefSeq	170504035	170736632	KCNIP1	Kv channel interacting protein 1%2C transcript variant 4		GTCCAGAATGCCTGCAAATTGCTGTAATTTTATACCATGTTCTAACCAATAAACAGAACT	NM_001278340
CUST_132756_PI430048170	2.24e-05	1.99e-07	1.28843	mRNA	NM_005788	RefSeq	20387529	20509333	PRMT3	protein arginine methyltransferase 3%2C transcript variant 1		GTGACTATTCCTTAGCCTTATAGATTTCTAGTACTGCCCAGGAAATCTAATTTCAATACA	NM_005788
CUST_98884_PI430048170	2.25e-05	2e-07	-1.27653	ncRNA	lnc-PURA-2:1	lncipedia	140117257	140122167			+	CATGCATTATACAAGTCTGTTTTCATGTATAGGATGTCTGCTTTTCTGGGACAAATTAGC		lnc-PURA-2:1
CUST_135970_PI430048170	2.26e-05	2.01e-07	-1.88159	mRNA	NM_006079	RefSeq	139372254	139374650	CITED2	Cbp/p300-interacting transactivator%2C with Glu/Asp-rich carboxy-terminal domain%2C 2%2C transcript variant 1		GGTGTGGAATGTCGTCAGTGGCAAACATTTCACAGATTTTTATTTTGTTTCTGTCTTCAA	NM_006079
CUST_131840_PI430048170	2.26e-05	2.02e-07	0.844655	mRNA	NM_001303031	RefSeq	37681569	37690595	C1orf109	chromosome 1 open reading frame 109%2C transcript variant 1		GTTGTGGGAATCTTGGTCATTGAATGTAAAGGGACTTAGTAAAGGGTATAGATATTTTTC	NM_001303031
CUST_29802_PI430048170	2.31e-07	1.76e-10	2.54252	ncRNA	NR_036480	RefSeq	89711855	89718165	VPS9D1-AS1	VPS9D1 antisense RNA 1	-	GTGATCCTTTGTGCAGCGGCTGCTGGCCTCTCAAACTTAATGTGTTCATTGCGGAACTTG	NR_036480
CUST_128292_PI430048170	2.26e-05	2.03e-07	1.36226	mRNA	NM_000978	RefSeq	38850067	38853800	RPL23	ribosomal protein L23		GGCGGGGCGTTAAAGTTCATATCCCAGTGTCCTTTGAATCGACTTCCTTTTTTCTTTTTT	NM_000978
CUST_19912_PI430048170	2.26e-05	2.03e-07	-1.52953	ncRNA	ENST00000621901	ENSEMBL_GENCODE	79456038	79459640	MAGI2-AS3		+	CTGCAGTTGTACCCCTTGAATGTAAAATAAAAAACAAAAGCCCACAAAAATAGGAATCCA		ENST00000621901
CUST_6366_PI430048170	2.75e-07	2.32e-10	2.51958	ncRNA	NR_036480	RefSeq	89711855	89718165	VPS9D1-AS1	VPS9D1 antisense RNA 1	-	TGATCCTTTGTGCAGCGGCTGCTGGCCTCTCAAACTTAATGTGTTCATTGCGGAACTTGC	NR_036480
CUST_121012_PI430048170	2.27e-05	2.04e-07	-2.52041	ncRNA	NONHSAT058565	NONCODE	21055400	21057192			-	GACTACAACCACGACCAATGATATGAAAAACCACCGTTGTATTTCAACTACAAGAACACC		NONHSAT058565
CUST_142860_PI430048170	2.28e-05	2.06e-07	1.56598	mRNA	NM_181842	RefSeq	3155589	3157967	ZBTB12	zinc finger and BTB domain containing 12		TCCTTCTCTTAGAAGTGCATGTATATGTGGAGGGAGGGAAAAGGGTCCTATAGAATGAGG	NM_181842
CUST_87647_PI430048170	0.0109	0.00142	2.51214	ncRNA	lnc-LRRTM4-8:1	lncipedia	77871540	78144197				GCAAACTTTACACCATGCCTTTGTGAGAATGCATTGGTAATAGCACTTCAGAAAATATTT		lnc-LRRTM4-8:1
CUST_143820_PI430048170	2.28e-05	2.07e-07	-0.688026	mRNA	NM_004545	RefSeq	92116123	92121809	NDUFB1	NADH dehydrogenase (ubiquinone) 1 beta subcomplex%2C 1%2C 7kDa		CCTGGAAGTAAAGACTGGCTAGATTATCGAATGTTCACATTTTAAAGTTCTGAGAGAAAT	NM_004545
CUST_124635_PI430048170	2.28e-05	2.07e-07	0.804212	mRNA	NM_006510	RefSeq	212403	233384	TRIM27	tripartite motif containing 27		TAGACTTGGCCATCTACAATAGCATCAATGGTGCCATCACCCAGTTCTCTTGCAACATCT	NM_006510
CUST_80866_PI430048170	2.28e-05	2.08e-07	-1.64291	ncRNA	lnc-SMC5-8:1	lncipedia	70529060	70530580				GGCTGGTAGACTAGGTAAGGTAAGGAAGGGAAAATTCACCTCATTCTTATTGCCATCTGG		lnc-SMC5-8:1
CUST_142443_PI430048170	2.28e-05	2.08e-07	-3.25897	mRNA	NM_030632	RefSeq	33578576	33747435	ASXL3	additional sex combs like transcriptional regulator 3		CCATAAGCCCAGAGGATTTTAGAGCTTCATGTGTGGCTTTTAAGAGCAGGTTTGAAAAAA	NM_030632
CUST_19326_PI430048170	0.000478	1.99e-05	2.51194	ncRNA	ENST00000439207	ENSEMBL_GENCODE	167241891	167245916	RP11-568A7.2			GCAACACGAGCACCTCATTTTGGTTTTCAGTTGGTCTTTTAATGAACAAATGTGTTGGAA		ENST00000439207
CUST_127560_PI430048170	2.29e-05	2.09e-07	3.1668	mRNA	NM_198534	RefSeq	7497558	7508450	C19orf45	chromosome 19 open reading frame 45		ACGGGCGAATTCGATTTTTTAACCATGAACCAGAAGATGCTGAAGCCACACAGAACACCT	NM_198534
CUST_142243_PI430048170	2.32e-05	2.12e-07	1.77725	mRNA	NM_030753	RefSeq	1281919	1338200	WNT3	wingless-type MMTV integration site family%2C member 3		ACCGAAATTTCCTACCAACCTGCTGTATCCAAAGTTTTGTAAAAAGTTGTAGAAGTTGTT	NM_030753
CUST_144500_PI430048170	2.35e-05	2.15e-07	-1.5012	mRNA	NM_176895	RefSeq	55424841	55535078	PPAP2A	phosphatidic acid phosphatase type 2A%2C transcript variant 2		CACACTTTGTGTGTACATAGTTACCTTTAACTCAGTGGTTATCTAATAGCTCTAAACTCA	NM_176895
CUST_80850_PI430048170	2.35e-05	2.16e-07	-2.2023	ncRNA	lnc-FOXD4L3-6:1	lncipedia	68396523	68406344			+	CTTTGGTTGGGAAAGAGTAACTGCAGTAATTAGGACCCAATTGATGGCAAAGGGGTATGA		lnc-FOXD4L3-6:1
CUST_69346_PI430048170	2.35e-05	2.16e-07	0.86429	mRNA	NM_004341	RefSeq	27217389	27243792	CAD	carbamoyl-phosphate synthetase 2%2C aspartate transcarbamylase%2C and dihydroorotase		TTGCCTATATCGATGGGCAGGTTCTGGTACCCCCGGGCTATGGACAGGATGTACGGAAGT	NM_004341
CUST_138453_PI430048170	2.35e-05	2.17e-07	-2.44583	mRNA	NM_001242400	RefSeq	42424451	42721878	GHR	growth hormone receptor%2C transcript variant 3		CTTGGATTCCTGATAGTGTGCTTCTGTTATCAAACACCAACATAAAAATGATCTAAACCA	NM_001242400
CUST_130935_PI430048170	2.35e-05	2.17e-07	1.11054	mRNA	NM_001144072	RefSeq	99200424	99386499	UBAC2	UBA domain containing 2%2C transcript variant 1		GTGTTTTACTCTTCAGTATTTTTCTATCAGACTTGTACAAATAAAGCCTTGTTCCAGGCT	NM_001144072
CUST_47914_PI430048170	2.36e-05	2.18e-07	-2.15472	ncRNA	lnc-C15orf2-9:10	lncipedia	24257120	24280464				ATGGGGGTTTGCTCTTTTTCTTTCATTATAACAGGAGTTTCTATAAGGTAAGTGACTTGT		lnc-C15orf2-9:10
CUST_67382_PI430048170	2.36e-05	2.19e-07	0.806394	ncRNA	lnc-RARA-2:1	lncipedia	40367951	40368438			+	TCTGATGATGAGAACTTCTTCCTGAAGCATACAGTCCTGGCATCTTGTCCATGGCAAATG		lnc-RARA-2:1
CUST_90147_PI430048170	2.38e-05	2.2e-07	-3.43748	mRNA	NM_002851	RefSeq	121873104	122062036	PTPRZ1	protein tyrosine phosphatase%2C receptor-type%2C Z polypeptide 1%2C transcript variant 1		AGAATCGATACATAAATATCGTTGCCTATGATCATAGCAGGGTTAAGCTAGCACAGCTTG	NM_002851
CUST_98433_PI430048170	1.19e-05	8.05e-08	2.50965	ncRNA	lnc-C2orf81-2:2	lncipedia	74418121	74418442				AAGACCGGGAAAACCACCACAACTCTGGGAAGGAAACCAAGGGGAAGACCCAAAAAACTG		lnc-C2orf81-2:2
CUST_143787_PI430048170	2.39e-05	2.22e-07	1.24824	mRNA	NM_004053	RefSeq	41921226	41933046	BYSL	bystin-like		CTATGGCTATTGTGTCAGGTCACTGTGGATAAAGGCAAAGACAGATATTTATTGAAAAAA	NM_004053
CUST_126960_PI430048170	2.39e-05	2.23e-07	-2.48419	mRNA	NM_018968	RefSeq	4167	64734	SNTG2	syntrophin%2C gamma 2		TTTCCTGCAGAATATTGCAACTTTGTGTTGTTTTATGATGAGCCTATAGTTGTGATACCA	NM_018968
CUST_145140_PI430048170	2.4e-05	2.23e-07	0.763052	mRNA	NM_018352	RefSeq	163494520	163520539	TMA16	translation machinery associated 16 homolog (S. cerevisiae)		TTGTGGAGAGAGAGTTGAAGATTAGGGAACCAGTGATTTTAATTATGCTACTTTTTCTTC	NM_018352
CUST_26938_PI430048170	0.0139	0.00196	2.50923	ncRNA	ENST00000436530	ENSEMBL_GENCODE	53599832	53614026	AL163953.2			CAATTGGCTGTAGATAATGTTAAAAGATAGGACTTTGGTAACAGGAGAATTCATGGATTC		ENST00000436530
CUST_136231_PI430048170	2.42e-05	2.26e-07	-1.68403	mRNA	NM_006765	RefSeq	15540086	15766649	TUSC3	tumor suppressor candidate 3%2C transcript variant 1		CATTTTGCTTAACATACTGTTCCTGGCATTAGATATTCACATGAGTAAGCCCAGTAGCAA	NM_006765
CUST_109483_PI430048170	2.42e-05	2.27e-07	0.943298	mRNA	NM_004398	RefSeq	108665024	108940930	DDX10	DEAD (Asp-Glu-Ala-Asp) box polypeptide 10		CAGGTGGTATCAACTTACATAAAGCAAAGGAAAGACTTCAGGAAGAGGACAAATTTGACA	NM_004398
CUST_7862_PI430048170	1.56e-07	1.02e-10	2.50749	ncRNA	NR_002584	RefSeq	119787352	119787484	SNORA69	small nucleolar RNA%2C H/ACA box 69	-	CCGTGTTAATCATTTTTGATTTTGCCTTTATGAGGGTAAAATCATGACAGATTGACATGG	NR_002584
CUST_7853_PI430048170	2.44e-05	2.3e-07	0.92165	ncRNA	NR_002602	RefSeq	3982506	3982572	SNORD37	small nucleolar RNA%2C C/D box 37	-	GATGACTGATCATTTCTTCACTTTGACCAGATGTCTACTGAAGAAAGCCTGCGTCTGAGG	NR_002602
CUST_17747_PI430048170	0.00265	0.000212	2.50659	ncRNA	NR_051996	RefSeq	122436496	122479087	MGC32805	uncharacterized LOC153163	+	ACCATGCCTGTGGAGATGCACAGTTCTACCATTCAAAATGACTATCTGAAAATACCTCCT	NR_051996
CUST_73838_PI430048170	2.44e-05	2.31e-07	0.879358	ncRNA	lnc-ALG3-2:1	lncipedia	184149686	184150502			+	TTTGAAGATGTCATCAGTGACAAACATCCTCTTCTTGGAAATTTGCACAGCCATCTTGCC		lnc-ALG3-2:1
CUST_103323_PI430048170	2.44e-05	2.31e-07	-2.85082	mRNA	NM_001302082	RefSeq	48727522	48776969	BEND5	BEN domain containing 5%2C transcript variant 2		GAGACTCTCCAAAGTCAACAAGTACATCTGTGAAAAAATCATGGATATCAATAAATCCTG	NM_001302082
CUST_38069_PI430048170	0.0232	0.00395	2.50592	ncRNA	ENST00000567788	ENSEMBL_GENCODE	130033454	130045057	RP11-474D1.3			CAGATATTTAGATAATATTTTCCCAACTGCCTGGAGCATTAGGTTAGAACTAGTGAGATA		ENST00000567788
CUST_49529_PI430048170	0.0331	0.0064	2.49472	ncRNA	lnc-POTEM-2:10	lncipedia	19292375	19337645				CTTCTGGCAATTAAAGTTAGTCATGTTAGAACACTGTCTAGGAATGGTTGGAAAATCATA		lnc-POTEM-2:10
CUST_23969_PI430048170	0.000182	5.21e-06	2.47882	ncRNA	ENST00000544553	ENSEMBL_GENCODE	64245964	64248217	RP11-783K16.5		-	TCTGCTGGTGCTACCAGGCTTGAACAGTCTTCAAATCCACTGCTATTAGGCAAATTACCT		ENST00000544553
CUST_60014_PI430048170	2.46e-05	2.34e-07	-3.50993	ncRNA	lnc-SOHLH2-3:1	lncipedia	35845900	35847623			-	GGACCATGTTATTCCTCTTGAAGTTAACTTTGTGACACTTACCACCTTAGAATAACTATA		lnc-SOHLH2-3:1
CUST_119423_PI430048170	2.46e-05	2.34e-07	-1.562	ncRNA	lnc-USP28-5:1	lncipedia	114060304	114061539			+	AGAAAAAGCCCACCACGTTTTCTCAAAGAGAAACAAAACGTAAGCAGTCCCAGTCCTGCT		lnc-USP28-5:1
CUST_130268_PI430048170	2.46e-05	2.35e-07	0.655693	mRNA	NM_001130089	RefSeq	75627723	75647687	KARS	lysyl-tRNA synthetase%2C transcript variant 1		GCAGTTCTGTTCAGCCATCAGAAGAGAGACAAGGAATTAAAAATTTCTTTTTAATCCTGT	NM_001130089
CUST_118529_PI430048170	0.00661	0.00072	2.47778	ncRNA	ENST00000605886	ENSEMBL_GENCODE	156641666	156644887	RP11-284F21.10		+	GTGGATGAAGGGAGAATGGGGGCTTTGCTCCTGAAAAGAGACACCCTTTCTAATAAAAAA		ENST00000605886
CUST_112545_PI430048170	1.44e-05	1.04e-07	2.46192	ncRNA	lnc-MAGEB5-6:2	lncipedia	26748028	26748352				TGGAAAACCACCACAACTCCAGGAAGGAAACCAAGGGGCAGACCCAAAAAACTGGAGAAG		lnc-MAGEB5-6:2
CUST_104671_PI430048170	2.47e-05	2.37e-07	-2.61649	mRNA	NM_024812	RefSeq	103140692	103230305	BAALC	brain and acute leukemia%2C cytoplasmic%2C transcript variant 1		AATCACAAAGAACTGTGTCAACTAGCAGAGAGTCCAAGCAGAAGGGCAGATGGACTTCTT	NM_024812
CUST_80908_PI430048170	9.3e-06	5.39e-08	2.46113	ncRNA	lnc-CEP78-1:1	lncipedia	78219119	78219357				GAGCCAGAACCACATATTCTTCTCTTCAGAGGACCTCTTCCAAAAGATCAACAAAAATGA		lnc-CEP78-1:1
CUST_143922_PI430048170	2.48e-05	2.39e-07	-2.26037	mRNA	NM_001164	RefSeq	6395123	6419111	APBB1	amyloid beta (A4) precursor protein-binding%2C family B%2C member 1 (Fe65)%2C transcript variant 1		TCCATGGGCACCTCTGCTGTATTGATATCACTAATAAAGTCTGTCTGCACTGCTAAAAAA	NM_001164
CUST_119831_PI430048170	2.48e-05	2.39e-07	-3.05607	mRNA	NM_052907	RefSeq	125326615	125662377	TMEM132B	transmembrane protein 132B%2C transcript variant 1		GTTCCACCGTATATTTAATGTCTCTGTAAAGGCACTTCCAAACATTTTGAAAACGAAGAA	NM_052907
CUST_135577_PI430048170	2.48e-05	2.39e-07	-4.56032	mRNA	NM_002667	RefSeq	118548278	118560424	PLN	phospholamban		TTTAAGGCACTGTAGTGAATTATCTGAGCTAGAGTTACCTAGCTTACCATACTATATCTT	NM_002667
CUST_18771_PI430048170	2.49e-05	2.41e-07	-2.13171	ncRNA	ENST00000436803	ENSEMBL_GENCODE	71344586	71420266	LINC00472		-	GGAGGAAAATGAAAACTGGACATCCATCTTAGGACTTAATCCTACGGAGACCACAAGCTG		ENST00000436803
CUST_77415_PI430048170	2.49e-05	2.41e-07	-2.57818	ncRNA	lnc-B3GAT2-6:6	lncipedia	71401064	71476824			-	CACTACGTGGACAGAGTTACCATGCATGTGCTTAGGTAAGATAAACTAATATTTAACATA		lnc-B3GAT2-6:6
CUST_120041_PI430048170	0.000555	2.45e-05	2.44847	ncRNA	lnc-DAOA-4:6	lncipedia	106376562	106378595				CTGTACAATTGCTCTGTACAACTCGATAAAATAATCCATGCTAACAAAAGTCTAGAATGG		lnc-DAOA-4:6
CUST_134868_PI430048170	2.49e-05	2.42e-07	-2.72378	mRNA	NM_012093	RefSeq	77282601	77559969	AK5	adenylate kinase 5%2C transcript variant 2		CTTCAATGGCTGTGCAGATAAGGATCCATTTCTGGGATAGAATTGTATTTTTTAAGTCAT	NM_012093
CUST_112544_PI430048170	2.49e-05	2.42e-07	1.23711	mRNA	NM_020445	RefSeq	152759748	152855379	ACTR3B	ARP3 actin-related protein 3 homolog B (yeast)%2C transcript variant 1		AAGCCATCGATAAACCTACATATGCTACAAAGTGGCCGATACGACATGGAATCATTGAAG	NM_020445
CUST_103897_PI430048170	0.000104	2.25e-06	2.44611	ncRNA	NR_003367	RefSeq	127890627	128101253	PVT1	Pvt1 oncogene (non-protein coding)	+	TGGACGGACTTGAGAACTGTCCTTACGTGACCTAAAGCTGGAGTATTTTGAGATTGGAGA	NR_003367
CUST_10435_PI430048170	2.5e-05	2.43e-07	-1.96473	ncRNA	NR_033712	RefSeq	3735983	3746771	TP73-AS1	TP73 antisense RNA 1%2C transcript variant 5	+	GTCCAGCTTAGCTTTCCAAAATTCTGTGTGGAACTTACTGGAGATGTTTTTATATATTTG	NR_033712
CUST_74728_PI430048170	2.5e-05	2.44e-07	-3.60662	ncRNA	lnc-LARP7-12:2	lncipedia	113373359	113381515			+	TAAAAGACAACAATGAGTAAAGCCATCACACAGAAGAGGGCTGTGGTGAAGGACCAGCAT		lnc-LARP7-12:2
CUST_129256_PI430048170	2.51e-05	2.46e-07	1.28094	mRNA	NM_006530	RefSeq	69359709	69390870	YEATS4	YEATS domain containing 4%2C transcript variant 1		CATTAGGAGCCTATAAGCATGAAACAGAATTTGCAGAGCTTGAAGTGAAAACCAGAGAAA	NM_006530
CUST_118339_PI430048170	0.00082	4.26e-05	2.44061	ncRNA	NR_110628	RefSeq	60659630	60825584	LOC101926964	uncharacterized LOC101926964		GCAGCAAGTTTTTGCCACACTGTAATACTTTAACTTTACAGATATTTTGACTCCTTCTGT	NR_110628
CUST_139589_PI430048170	2.52e-05	2.48e-07	-1.88568	mRNA	NM_001301043	RefSeq	115173624	115504523	CADM1	cell adhesion molecule 1%2C transcript variant 3		GTCTCAGGTAGATTGCAAAGTGTAGGCCCCACACATTGGAAAAAATAATAATAAAACAAA	NM_001301043
CUST_129628_PI430048170	2.52e-05	2.48e-07	-2.30795	mRNA	NM_001162995	RefSeq	75633433	75641406	SMIM5	small integral membrane protein 5%2C transcript variant 1		CAGTATTCTAGTCCAGTATTTGCCAGTTTCCAAGTAAAAGCTTTTGTGTTACGTGTTAAA	NM_001162995
CUST_78996_PI430048170	8.22e-05	1.55e-06	2.43763	ncRNA	lnc-PIK3CG-2:5	lncipedia	106775041	106780146				TATGGCATCATTTTAGCATCCTCAGCTCTGTTAGTTTGAGGGTAACCTCAGCAAACATGC		lnc-PIK3CG-2:5
CUST_135197_PI430048170	2.56e-05	2.52e-07	0.748633	mRNA	NM_023070	RefSeq	40450664	40463718	ZFP69B	ZFP69 zinc finger protein B		GTGGTTCCCTGATCCCTCAAAAATCCATTTGTTTTTGGATTTCCAAAAACGAACATTAAA	NM_023070
CUST_104094_PI430048170	2.56e-05	2.53e-07	1.84904	mRNA	NM_174983	RefSeq	3544198	3557584	MFSD12	major facilitator superfamily domain containing 12%2C transcript variant 3		AGGAAGTAGGAATCCCAGAAGGGTCTGGGGGAACCCTAACCCTGAGCTCAGTCCAGTTCA	NM_174983
CUST_131504_PI430048170	2.56e-05	2.54e-07	-3.96355	mRNA	NM_001911	RefSeq	24573517	24576260	CTSG	cathepsin G		GCCAGAGCCTTAATAAACGTCCACAGAGTATAAATAACCAATTCCTCATTTGTTCATTAA	NM_001911
CUST_21454_PI430048170	6.49e-05	1.09e-06	2.43653	ncRNA	NR_003367	RefSeq	127890627	128101253	PVT1	Pvt1 oncogene (non-protein coding)	+	GACTTGAGAACTGTCCTTACGTGACCTAAAGCTGGAGTATTTTGAGATTGGAGAATTAAG	NR_003367
CUST_132566_PI430048170	2.56e-05	2.54e-07	-5.56166	mRNA	NM_007102	RefSeq	42153420	42155824	GUCA2B	guanylate cyclase activator 2B (uroguanylin)		TTCCAGGGCCTGAGCAGCTGGATCTGGTACAAAGCAATCGGACATAGAGTTGGAGGGGGA	NM_007102
CUST_130937_PI430048170	2.56e-05	2.54e-07	-2.09447	mRNA	NM_004750	RefSeq	18593224	18606850	CRLF1	cytokine receptor-like factor 1		CTAGGGCCCCTCCAAAAGAGTCCTTTTAAATAAATGAGCTATTTAGGTGCTGTGATTGTG	NM_004750
CUST_129932_PI430048170	2.56e-05	2.56e-07	2.2658	mRNA	NM_003486	RefSeq	87830022	87869494	SLC7A5	solute carrier family 7 (amino acid transporter light chain%2C L system)%2C member 5		GTAGGGTGTTCTGGCTTTTTTGTGGGGTTTTTATTTTTAAAGAAACACTCAATCATCCTA	NM_003486
CUST_142436_PI430048170	2.56e-05	2.56e-07	1.98235	mRNA	NM_018140	RefSeq	612289	653551	CEP72	centrosomal protein 72kDa		AGATGAAGTAAATGCAGTGTTCTACTGCCTGATGTGAAAGAGAGCTATGTATGATAATTA	NM_018140
CUST_49755_PI430048170	2.56e-05	2.56e-07	-1.76371	ncRNA	NR_024359	RefSeq	135421942	135426300	SMIM10L2A	long intergenic non-protein coding RNA 86		AGAGAGCTGTTCTTGTTTCTGGTGTTGTCACGTCTTCTTGTTTTCTCTAAGTTTAAAAAA	NR_024359
CUST_127733_PI430048170	2.56e-05	2.56e-07	1.43554	mRNA	NM_001191060	RefSeq	790474	797995	SLC25A22	solute carrier family 25 (mitochondrial carrier: glutamate)%2C member 22%2C transcript variant 1		GTTGTAACTTTTTGTGTCTTGTCATGTCAGAGAATAAATAAATATTCTAAGTAGAAAAAA	NM_001191060
CUST_127412_PI430048170	2.58e-05	2.59e-07	-3.39866	mRNA	NM_000049	RefSeq	3476001	3499406	ASPA	aspartoacylase%2C transcript variant 1		TCGCTGCTGTTTACATTAGAAATCACTTCCAGCTTACATCTTACACGGTGTCTTACAAAT	NM_000049
CUST_139495_PI430048170	2.58e-05	2.59e-07	-2.80548	mRNA	NM_021153	RefSeq	66501186	66604138	CDH19	cadherin 19%2C type 2%2C transcript variant 1		GCTTCCAGTGACCCTGGCTTTGTCTTGCTTTGTATTAGATTACTCAGCTCCCTGGTATTA	NM_021153
CUST_142650_PI430048170	2.58e-05	2.59e-07	1.63326	mRNA	NM_001135811	RefSeq	171379	216981	FAM60A	family with sequence similarity 60%2C member A%2C transcript variant 1		CCTCTCTTTGCCTGTAGGATGTACTGTATGTAGTCATGCACTTTGTATTAATATATTAGA	NM_001135811
CUST_60574_PI430048170	2.58e-05	2.6e-07	1.1493	mRNA	NM_007111	RefSeq	113584740	113641473	TFDP1	transcription factor Dp-1%2C transcript variant 1		TTGCCAAAAACCTTTGGACAGTCCAATGTCAACATTGCCCAGCAAGTGGTAATTGGTACG	NM_007111
CUST_119945_PI430048170	7.64e-05	1.4e-06	2.42815	ncRNA	NR_046551	RefSeq	50807854	50849905	DLEU7-AS1	DLEU7 antisense RNA 1	-	CTGTCTGTGCTAGGAAAACAAGAGAAGCCAACAGATGTGTTTATTTTATTTGTTTGATCA	NR_046551
CUST_52897_PI430048170	0.00682	0.000751	2.42675	ncRNA	ENST00000560148	ENSEMBL_GENCODE	74202705	74221557	RP11-60L3.1		-	CTGGAGACTCGGGAACTAAAACAATCAATTCCCCTGAGCAATAAAATTATGGACAGTGAA		ENST00000560148
CUST_98692_PI430048170	2.64e-05	2.67e-07	-3.90253	mRNA	NM_013363	RefSeq	142817859	142889203	PCOLCE2	procollagen C-endopeptidase enhancer 2		TTTATAGTGTTATTTGTTTCACCTTCAAGCCTTTGCCCTGAGGTGTTACAATCTTGTCTT	NM_013363
CUST_60211_PI430048170	5.35e-05	7.97e-07	2.42174	ncRNA	lnc-DLEU7-8:1	lncipedia	50378358	50379367				TAATTCGATGCTACTGCTGCCAAAGCCACATGGGATGCAAATGAAACTGGGTTCACCTTT		lnc-DLEU7-8:1
CUST_57235_PI430048170	2.65e-05	2.68e-07	-2.1103	mRNA	NM_018222	RefSeq	12377478	12535356	PARVA	parvin%2C alpha		TTTGCCAGATTGCTTTCATTTACAGAATTTGCCCATTCATGTGTCTTTGTGTTTATGGAT	NM_018222
CUST_118328_PI430048170	2.66e-05	2.7e-07	0.66872	ncRNA	NONHSAT003455	NONCODE	56619408	56619549				GATCAGGAATTCACTGACCACCTCGTCAAGACCCACACCAGAGTCTCCATGCAGCGGACT		NONHSAT003455
CUST_127216_PI430048170	2.68e-05	2.73e-07	-1.96404	mRNA	NM_018222	RefSeq	12377478	12535356	PARVA	parvin%2C alpha		GTGTTTATGGATTAAATGGCTTTCTGACCAGCATCCCTTTGGTGTGCTTTGTCAATAAGA	NM_018222
CUST_132457_PI430048170	2.68e-05	2.73e-07	0.596145	mRNA	NM_001022	RefSeq	41859917	41871416	RPS19	ribosomal protein S19		CAGCTGCCAACAAGAAGCATTAGAACAAACCATGCTGGGTTAATAAATTGCCTCATTCGT	NM_001022
CUST_136629_PI430048170	2.7e-05	2.75e-07	1.69519	mRNA	NM_017955	RefSeq	105009572	105021088	CDCA4	cell division cycle associated 4%2C transcript variant 1		GTCGAAAGTTAATCCTCATGGACCCTAGTTTAAAGGGTATGTGTTTTATAGGAATAAATC	NM_017955
CUST_14869_PI430048170	2.71e-05	2.77e-07	-4.84826	ncRNA	NR_110150	RefSeq	64561345	64590084	ADAMTS9-AS1	ADAMTS9 antisense RNA 1%2C transcript variant 1	-	AGAAGAGCTTTCAGATAGCTGCGGGACTTGCAACTGTGACTTTCAGCTTTCGCTTTTGAA	NR_110150
CUST_126421_PI430048170	0.00598	0.000629	2.42125	ncRNA	ENST00000568031	ENSEMBL_GENCODE	88177298	88178610	RP11-863P13.3			TAATATCCTGATTTCAGTGGACTTGCATGGAAGGAAACGCAAGTTCATTTGCCAGTGGGG		ENST00000568031
CUST_140673_PI430048170	2.71e-05	2.78e-07	1.27241	mRNA	NM_024112	RefSeq	128160259	128163928	C9orf16	chromosome 9 open reading frame 16		ATGCTGGACCAGATCAACTCCTGTCTGGACCACCTGGAGGAGAAGAATGACCACCTCCAC	NM_024112
CUST_145678_PI430048170	2.72e-05	2.79e-07	-1.61742	mRNA	NM_002397	RefSeq	88718240	88883466	MEF2C	myocyte enhancer factor 2C%2C transcript variant 1		GGATTGCTTCAGATGGTTTGCTGTATCATTTTTCTTCTTTTTCTTTTCCTGGGGACTTGT	NM_002397
CUST_113509_PI430048170	2.72e-05	2.79e-07	-3.2671	mRNA	NM_004010	RefSeq	31119227	33128427	DMD	dystrophin%2C transcript variant Dp427p2		AGAAGAATGATAAATTCCACAAGCATTCAGAAGCAGGCTTCCCTAAAGATGAAAGAGAAG	NM_004010
CUST_45710_PI430048170	2.73e-05	2.81e-07	-1.93287	ncRNA	NR_038269	RefSeq	165750	166448	LOC100506844	uncharacterized LOC100506844		AGTTTGGCTGTCAAGGAAAACAGAGAATGTGCTAAAGAACATACAGACACAGAGCAGACA	NR_038269
CUST_29044_PI430048170	2.75e-05	2.83e-07	-1.06629	ncRNA	ENST00000623853	ENSEMBL_GENCODE	29204633	29205855	RP11-426C22.1		+	AGATCATGTCCTTCCTGCTGTGTGATGGAATGACAGTGACAGTAGAGGGTGATGTATTTG		ENST00000623853
CUST_62155_PI430048170	2.76e-05	2.84e-07	0.979867	ncRNA	lnc-SEMA7A-1:1	lncipedia	74361374	74367646			-	AGTTTTCTGCTGTTTTTGGAATCTTGTCTGCAAACAGCTCAAAGGAGACGTGACCCAAGG		lnc-SEMA7A-1:1
CUST_35535_PI430048170	2.81e-05	2.91e-07	0.984668	ncRNA	ENST00000516890	ENSEMBL_GENCODE	38851524	38851659	SNORA21		-	ACTTTGTAGATGAGATGGCAGGAGGGTGGATTGTTGGTCTCAGTCAGTGGTGGGACAGAC		ENST00000516890
CUST_126725_PI430048170	2.81e-05	2.91e-07	-1.71482	mRNA	NM_001702	RefSeq	142464015	142545007	ADGRB1	adhesion G protein-coupled receptor B1		CAGGAAGAAGCAGGGGGGAATCTATTTTTTCTCTCCTTTTCTTTTCTTCAATAAAAAGAA	NM_001702
CUST_58998_PI430048170	2.82e-05	2.93e-07	2.27477	mRNA	NM_007210	RefSeq	51352048	51391416	GALNT6	polypeptide N-acetylgalactosaminyltransferase 6		TCAGATTCCCAGGCTGACAAAAAGGAGAAACAGCTTTTACTTGCATCCAGGGCCAATCAT	NM_007210
CUST_65080_PI430048170	2.87e-05	2.98e-07	2.11859	mRNA	NM_001290149	RefSeq	50797692	50804853	C19orf48	chromosome 19 open reading frame 48%2C transcript variant 3		CAACAAATGGGAAAAGTTAACATTTGCACCATCTTGCCATATTCAAAAACCTTGTGCTTA	NM_001290149
CUST_104111_PI430048170	2.89e-05	3e-07	1.52768	mRNA	NM_001282575	RefSeq	50081123	50115959	UBE2V1	ubiquitin-conjugating enzyme E2 variant 1%2C transcript variant 12		CATGCGAGTAAACATTTACGGGCACCATAGATAAAAGGCTTGTGTTTTAATCCTCATCCT	NM_001282575
CUST_7894_PI430048170	2.26e-05	2.03e-07	2.42054	ncRNA	NR_002165	RefSeq	34833574	34834462	HMGB3P1	high mobility group box 3 pseudogene 1		TTATGTCACTAAGGTGGCAAAGCTGAAGAAGTATGAGAAGGATGTTGCTGACTATAAGTC	NR_002165
CUST_82353_PI430048170	0.0216	0.00358	2.41627	ncRNA	lnc-USP9Y-2:2	lncipedia	12339812	12347487				TGTTCTATCAGGTGATGGAACGAGTCCAGCAGGTGATGCGGGAACACCAGCGGACACTCA		lnc-USP9Y-2:2
CUST_59126_PI430048170	2.93e-05	3.07e-07	0.793568	mRNA	NM_001282604	RefSeq	56663340	56688408	PTGES3	prostaglandin E synthase 3 (cytosolic)%2C transcript variant 5		TTCACATTATTCTATGTAAGTGATGACTTGTCAGTGTTCCAGGTGTATCTTAGCTAAAAC	NM_001282604
CUST_136784_PI430048170	2.93e-05	3.07e-07	-1.03757	mRNA	NM_001286645	RefSeq	2844149	2930075	ADD1	adducin 1 (alpha)%2C transcript variant 5		GTCCTGAATGTCCTTTCTCCAGTGTAACATGTTTTACTCACAAATAAAATTCTTTCAGCA	NM_001286645
CUST_78258_PI430048170	2.93e-05	3.07e-07	0.838691	mRNA	NM_007276	RefSeq	26201210	26213607	CBX3	chromobox homolog 3%2C transcript variant 1		ACTGGTTCAGCAAAAGCCAGGAAGAACAACTTTGTAGTAATCAAAATGTTATCCAACTGT	NM_007276
CUST_104416_PI430048170	2.96e-05	3.11e-07	-1.5837	mRNA	NM_153634	RefSeq	38652199	38905618	CPNE8	copine VIII		AGAAGTGGAAACCACATACTGAGCATGGCTAGATTGGCTAAAGATGTCCTAGCTGAGATC	NM_153634
CUST_88592_PI430048170	0.000119	2.77e-06	2.41431	ncRNA	NR_027282	RefSeq	122879632	122898714	LOC399815	chromosome 10 open reading frame 88 pseudogene		CTGAAAACTTACAAGCGTACATTGATAAAAGCACACAGGCATCTAGTGGAGAGAATTCTA	NR_027282
CUST_135795_PI430048170	2.97e-05	3.12e-07	-3.46866	mRNA	NM_004816	RefSeq	69329324	69392454	FAM189A2	family with sequence similarity 189%2C member A2%2C transcript variant 1		CTCATGCTTGCAAAACTAGAGACCCCTAAGGCAGAACTGAGAATAAACATGTTTACTTTG	NM_004816
CUST_75379_PI430048170	2.98e-05	3.14e-07	0.763694	ncRNA	lnc-BRIX1-1:1	lncipedia	34945760	34952743			+	TTTCTGATCTAAATGGTATGGTGGGGAAAAACCATCAGATCAACAGAAAGGACATAATTT		lnc-BRIX1-1:1
CUST_95438_PI430048170	3e-05	3.17e-07	-4.45391	mRNA	NM_153370	RefSeq	36954432	36964837	PI16	peptidase inhibitor 16%2C transcript variant 1		ATACTTCTTGGTTAAGGCCCTCCGGAAGGGAAAGGCTACGGGGCATGTGCCTCATCACAC	NM_153370
CUST_121544_PI430048170	0.0074	0.000837	2.41363	ncRNA	NONHSAT070687	NONCODE	53486143	53486280				TCCCGCAACCCAGTGTGGCATCTGGGTTTGAACCAGCAATGGAGGTCATTTTGCTTCACC		NONHSAT070687
CUST_68699_PI430048170	3.01e-05	3.19e-07	-3.48339	mRNA	NM_002084	RefSeq	151020437	151028993	GPX3	glutathione peroxidase 3		AGCAGTATGCTGGCAAATACGTCCTCTTTGTCAACGTGGCCAGCTACTGAGGCCTGACGG	NM_002084
CUST_42929_PI430048170	3.01e-05	3.19e-07	-2.90266	ncRNA	NR_121614	RefSeq	71407864	71420745	LINC00472	long intergenic non-protein coding RNA 472%2C transcript variant 4		CTTGATGGGATAGCTAATGTTTTTTGTCATTGCATAGCTTTGTAAACTTGTCCTAAGGAT	NR_121614
CUST_144822_PI430048170	3.01e-05	3.19e-07	-2.55761	mRNA	NM_033201	RefSeq	1092444	1246252	C16orf45	chromosome 16 open reading frame 45%2C transcript variant 1		GCAGTCACCCATCAGAGAAAATAAAAATGGAAACCACGTTCACAGCATTTTAAAAGTTTT	NM_033201
CUST_136848_PI430048170	3.01e-05	3.19e-07	-1.97067	mRNA	NM_001480	RefSeq	77250051	77270140	GALR1	galanin receptor 1		GGACTGAATATACCTGGGGTATCCTATCTTGTACAAATGCATGCTTTTTCATTAAATTTG	NM_001480
CUST_144851_PI430048170	3.05e-05	3.25e-07	1.5477	mRNA	NM_020799	RefSeq	88880186	88923502	STAMBPL1	STAM binding protein-like 1		GATAATGTACCCAAATACTATGGCCAGATAATAAATTGTGCTGCAAACAACATGTCTTGT	NM_020799
CUST_57373_PI430048170	3.05e-05	3.26e-07	-3.33175	ncRNA	lnc-DCDC5-2:2	lncipedia	30411121	30441403			-	TGCCATTGTAAATTGTTAGTGTTCGCCAAAGGACAGCCAAGCTTTCTTTTAAAAAGTGAT		lnc-DCDC5-2:2
CUST_134598_PI430048170	3.05e-05	3.26e-07	-2.61643	mRNA	NM_001256443	RefSeq	29812087	29815881	PRRT2	proline-rich transmembrane protein 2%2C transcript variant 3		TTTCTCCCTTTTTGTATGCCGGATGCTGCATGAGTCTGAAACACCAATAAACGGAGACTG	NM_001256443
CUST_27654_PI430048170	0.00149	9.57e-05	2.41091	ncRNA	ENST00000602684	ENSEMBL_GENCODE	30648797	30649529	RP11-932O9.10			GGGTCCTTAACGTAGTCTGTGAGATAACTATTTTTGAAGTAGGCATATTTATTCCTTAGT		ENST00000602684
CUST_142832_PI430048170	3.07e-05	3.29e-07	-2.07342	mRNA	NM_001012979	RefSeq	103273689	103276869	TCEAL5	transcription elongation factor A (SII)-like 5		TTTGCCGGCCTATGTGCTTTAACCTTAAGCTGATACTTTCCTTTAGGTGTCACTCTTGTT	NM_001012979
CUST_82087_PI430048170	3.07e-05	3.3e-07	1.18405	mRNA	NM_014060	RefSeq	120603888	120621161	MCTS1	malignant T cell amplified sequence 1%2C transcript variant 1		GAATTACTCTTTTTTAGACAAAGAGAAGGGCCTTTTTATCCAACCCTAAGATTACTTCAC	NM_014060
CUST_63460_PI430048170	3.07e-05	3.3e-07	-2.27828	mRNA	NM_001162995	RefSeq	75633433	75641406	SMIM5	small integral membrane protein 5%2C transcript variant 1		TGTCAGTATTCTAGTCCAGTATTTGCCAGTTTCCAAGTAAAAGCTTTTGTGTTACGTGTT	NM_001162995
CUST_124909_PI430048170	3.1e-05	3.33e-07	0.934248	ncRNA	NONHSAT119948	NONCODE	31330710	31330896				GGTATTTCTCAAATTATGGATGACTTAACATCAAAGCCCCCAGGAACTACTGAGTGGGAG		NONHSAT119948
CUST_144047_PI430048170	3.11e-05	3.35e-07	1.32427	mRNA	NM_019037	RefSeq	144078618	144080648	EXOSC4	exosome component 4		AGATGTGCACACCCTCTTAGATCGAGTGGTCCGGCAGCATGTGCGTGAGGCCTCTATCTT	NM_019037
CUST_134565_PI430048170	3.12e-05	3.37e-07	1.11393	mRNA	NM_004697	RefSeq	113275633	113292905	PRPF4	pre-mRNA processing factor 4%2C transcript variant 1		CCTAAACCTTTTCTTTATTCCACATTTGCTACGGTAAAATCCTGTTACAAAACTACCCTA	NM_004697
CUST_124467_PI430048170	3.13e-05	3.37e-07	1.18218	mRNA	NM_006295	RefSeq	3025293	3043709	VARS	valyl-tRNA synthetase		ACCTGAGTGTGTTCTACCCCGGGACACTGCTGGAGACCGGTCATGACATCCTCTTCTTCT	NM_006295
CUST_53810_PI430048170	3.13e-05	3.38e-07	1.2116	mRNA	NM_001303031	RefSeq	37681569	37690595	C1orf109	chromosome 1 open reading frame 109%2C transcript variant 1		ACTGTATGTCAGAGAAGAGACGGCGCTTGGACGCCAGGAATCCTCTGAAGCAGGAGACTG	NM_001303031
CUST_135355_PI430048170	3.14e-05	3.41e-07	-2.16597	mRNA	NM_015319	RefSeq	53048948	53064378	TNS2	tensin 2%2C transcript variant 1		CAGAGATTCAGAGTAGGATCACATGAATAGGGGAAAAAAGAGAGTCTATTTTTGTCTAAT	NM_015319
CUST_32937_PI430048170	3.14e-05	3.41e-07	-1.75296	ncRNA	NR_036508	RefSeq	58002893	58007206	LOC100128398	uncharacterized LOC100128398	+	GCTGGAACTGTTCTGTATAAACAAAGGGCAAGGTAATTGCTACATAGATTCTTTTCTTAT	NR_036508
CUST_132048_PI430048170	3.14e-05	3.41e-07	-5.49063	mRNA	NM_130797	RefSeq	154052417	154894290	DPP6	dipeptidyl-peptidase 6%2C transcript variant 1		AGTGGGGATGTGGCATGGTAGCGTCTGTTCATCCATGGAATAAAACATTATTTTACCACT	NM_130797
CUST_139975_PI430048170	3.15e-05	3.42e-07	-3.8829	mRNA	NM_001042	RefSeq	7281734	7288048	SLC2A4	solute carrier family 2 (facilitated glucose transporter)%2C member 4		TAAATGCTCAATAAATTGTAGCTGCCAGTGCCGGGCATTGCTCTTGGCATTTGCAAAAAA	NM_001042
CUST_138906_PI430048170	3.15e-05	3.42e-07	-2.17136	mRNA	NM_198968	RefSeq	95578201	95644706	DZIP1	DAZ interacting zinc finger protein 1%2C transcript variant 2		GTGGGTACAAAGACTTCTATCTATGAATGATTAAAAAGGCTAGAGTACGAATACTTCTTG	NM_198968
CUST_111309_PI430048170	0.00118	7.01e-05	2.40922	ncRNA	lnc-TRIM2-2:2	lncipedia	153344661	153355809			+	CAATTAAAAGACTTGGAGAAGATTGCTCCCAAAGAGAAAGGCATTAGTAAGTACCAAAGT		lnc-TRIM2-2:2
CUST_39311_PI430048170	0.00227	0.000172	2.40613	ncRNA	lnc-PDCD6IP-2:6	lncipedia	34323547	34435632				TATTCCTGTGAGCCTTGTAGGTACTTTCGAATCAAGGAAATTAGTAGTTGATTGCTAATT		lnc-PDCD6IP-2:6
CUST_114837_PI430048170	3.17e-05	3.46e-07	-3.61285	mRNA	NM_004827	RefSeq	88090263	88158859	ABCG2	ATP-binding cassette%2C sub-family G (WHITE)%2C member 2 (Junior blood group)%2C transcript variant 1		TTAGCTGCAAGGAAAGATCCAAGTGGATTATCTGGAGATGTTCTGATAAATGGAGCACCG	NM_004827
CUST_28492_PI430048170	3.17e-05	3.47e-07	-1.70254	ncRNA	ENST00000620029	ENSEMBL_GENCODE	96118843	96135469	NR2F2-AS1			TCAGGATGACTCCACCTTTGTACCTGACTGAGGAACTTAGTGAACCCTGAAGAAATGATG		ENST00000620029
CUST_127579_PI430048170	3.2e-05	3.5e-07	1.82905	mRNA	NM_145901	RefSeq	34236872	34246231	HMGA1	high mobility group AT-hook 1%2C transcript variant 3		ATTTGTCCCAGCCTGGGGCTCCCTCTCTGGTTTCCTATTTGCAGTTACTTGAATAAAAAA	NM_145901
CUST_142917_PI430048170	3.2e-05	3.51e-07	-2.56431	mRNA	NM_001080433	RefSeq	56184122	56386174	CCDC85A	coiled-coil domain containing 85A		CTGCAGAAGCTAATACAAGGGACACTGGTCTTTTGACAAAATAAACTTGTGTAAATTTTG	NM_001080433
CUST_69823_PI430048170	3.2e-05	3.51e-07	-0.590688	ncRNA	lnc-ZDHHC18-1:1	lncipedia	26859648	26860032				TTCACATGATAATAATAGTTGTCATCTGGCCGGGCATGGTGGCTTATGCCTATAATTTCA		lnc-ZDHHC18-1:1
CUST_105071_PI430048170	3.2e-05	3.52e-07	-0.757398	mRNA	NM_015241	RefSeq	17787649	18024559	MICAL3	microtubule associated monooxygenase%2C calponin and LIM domain containing 3%2C transcript variant 1		ATGAAGAAGGAGTTCCCGCAGAACCTGGGAGGCAGCGACACATGCTACTTCTGCCAGAAG	NM_015241
CUST_128313_PI430048170	3.22e-05	3.55e-07	2.08042	mRNA	NM_174911	RefSeq	126552437	126558466	FAM84B	family with sequence similarity 84%2C member B		AAGTTCTTTTCAAAAGATGCTATGAGCGTTTCCAATAAACCATCTATTAGAGTTCACTGG	NM_174911
CUST_128575_PI430048170	3.26e-05	3.6e-07	-2.99321	mRNA	NM_018192	RefSeq	189956727	190121119	P3H2	prolyl 3-hydroxylase 2%2C transcript variant 1		CTCATTGCTGCTATCCAGCACACAGATTTGTGCTTGTGTCTGATTTGTTTAATAAAGGGA	NM_018192
CUST_62679_PI430048170	8.62e-05	1.67e-06	2.3926	ncRNA	lnc-NOS2-1:2	lncipedia	27651333	27665712			-	AGCTCAAGTGCTATCACGAAGATATCTTTGGTGCTGTATTTCCCTACAAGCAGACAAGGC		lnc-NOS2-1:2
CUST_71344_PI430048170	3.26e-05	3.61e-07	1.19571	mRNA	NM_003095	RefSeq	95858930	95866461	SNRPF	small nuclear ribonucleoprotein polypeptide F		GTGAAGTTTTAATAAGGTGTAATAATGTCCTTTATATCAGAGGTGTGGAAGAAGAGGAAG	NM_003095
CUST_104059_PI430048170	3.28e-05	3.63e-07	-1.16281	ncRNA	lnc-QKI-11:2	lncipedia	162727999	162814335			+	GACTTCCCAATTGCCCTTGAGCATGATTCGAAAGGAAACAAAATCGCCTGGAAGGTAAGT		lnc-QKI-11:2
CUST_19537_PI430048170	5.08e-06	1.99e-08	2.38019	ncRNA	ENST00000428100	ENSEMBL_GENCODE	20133924	20140453	AC005062.2		-	AGCCATGTTGTTACCATAAAGGGAAAGCCCAGAGCTGCTGGGCAGCTTTGTGGAGCCCAG		ENST00000428100
CUST_96634_PI430048170	3.32e-05	3.69e-07	-2.87153	ncRNA	NR_111893	RefSeq	67059459	67294592	CNTNAP3P2	contactin associated protein-like 3 pseudogene 2	+	AGTAACTTGGATCTTAATTTTGAGATCAGCTTTGGGGGAATTCCGACACCCGGAAGATCG	NR_111893
CUST_133884_PI430048170	3.33e-05	3.7e-07	2.5384	mRNA	NM_018304	RefSeq	59155498	59206709	PRR11	proline rich 11		GAATGGCAACCAGAGAATGTAAACAACCAAGGTGCATCTGGTTATGTTTTAAAATAAAGA	NM_018304
CUST_28673_PI430048170	0.000152	4.01e-06	2.36304	ncRNA	ENST00000621884	ENSEMBL_GENCODE	1707252	1707973	LA16c-329F2.2		+	GGCTTTTTCTGAAACCAAGGTGATTTATGGCCTAGTTTGGTTTAAAGCGTGTTTATAAAA		ENST00000621884
CUST_73510_PI430048170	3.34e-05	3.73e-07	1.03942	mRNA	NM_007208	RefSeq	131462200	131503016	MRPL3	mitochondrial ribosomal protein L3		TCACAACAAAATCACACATGTCATCTTTGTCAAGGGCATAAATATATCATTCATACCCCC	NM_007208
CUST_77564_PI430048170	3.35e-05	3.74e-07	-0.718677	mRNA	NM_032870	RefSeq	99399964	99425331	PNISR	PNN-interacting serine/arginine-rich protein%2C transcript variant 1		CGCTTGGATTCGCGAAGGTCTTGAAAAAATGGAACGTGAAAAGCAGAAGAAATTGGAGAA	NM_032870
CUST_68215_PI430048170	0.000288	9.96e-06	2.3588	ncRNA	lnc-C10orf113-3:3	lncipedia	20813739	20815825			-	GAGGGAGGGGCATTTCTAATCACACTGAAATGCAGTGGAAACATTTAGTCTAATAAAATG		lnc-C10orf113-3:3
CUST_135156_PI430048170	3.35e-05	3.76e-07	-1.92752	mRNA	NM_022467	RefSeq	33684527	33773509	CHST8	carbohydrate (N-acetylgalactosamine 4-0) sulfotransferase 8%2C transcript variant 3		GGGGGGAGGTTCCCTTGGATTAAGGTTCCAAATAAAGCACATGGTTTCCAGAGCAAAAAA	NM_022467
CUST_127270_PI430048170	3.36e-05	3.77e-07	-3.15423	mRNA	NM_015621	RefSeq	151181051	151224093	CCDC69	coiled-coil domain containing 69		TTCTCCTCACTCTGGGACAGACGATGTATGGAAACTAAAAAGAACATGCGGCACCTTAAA	NM_015621
CUST_143042_PI430048170	3.36e-05	3.78e-07	0.834705	mRNA	NM_017814	RefSeq	19119615	19138501	TMEM161A	transmembrane protein 161A%2C transcript variant 1		GCAAGGGTGATGCTGGCTGCTCTTCTGAACAAATAAAGGAGCATGCCGATTTTTACAAAC	NM_017814
CUST_143055_PI430048170	3.37e-05	3.8e-07	-1.44869	mRNA	NM_005197	RefSeq	89156171	89417110	FOXN3	forkhead box N3%2C transcript variant 2		CCTACCATAAAGTTTCTGTGATGTATTGTCTTCCAGTTGCAATAAAAATTACTGAGTTGC	NM_005197
CUST_103598_PI430048170	0.00145	9.25e-05	2.35798	ncRNA	lnc-MSRB3-5:1	lncipedia	65824810	65829013			+	AGAGGAACTATGTCAGGGTTAATGCATGTATAGAGAAGTACCAGTCACTTTTTTGACTTT		lnc-MSRB3-5:1
CUST_64306_PI430048170	3.37e-05	3.8e-07	-2.42924	ncRNA	NR_002931	RefSeq	7787483	7791012	CLEC4GP1	C-type lectin domain family 4%2C member G pseudogene 1		TGCAACACCTGCGCAAGGTTCAGGGCTACTCGTGGGTGGACTGAGTCCCACTCAGCTTCA	NR_002931
CUST_10466_PI430048170	0.00109	6.31e-05	2.34527	ncRNA	ENST00000602916	ENSEMBL_GENCODE	7700704	7700970	RP11-338N10.3		+	AGAAAGTCCACATCAACTGATTTCATTACACCTGTTACATTTCAATACACTCCAGGGAAA		ENST00000602916
CUST_138839_PI430048170	3.37e-05	3.81e-07	-2.7491	mRNA	NM_198859	RefSeq	64093849	64225455	PRICKLE2	prickle homolog 2 (Drosophila)		TAAAGTGTCATGATTCTGTCATAGACCCTGACTTAACATTGTAAGGACTATGAGTCCTCC	NM_198859
CUST_48222_PI430048170	2e-06	4.61e-09	2.34189	ncRNA	lnc-SLC4A1AP-1:7	lncipedia	27715930	27755704				GACTTTCAGCACAAGGTTTCAGAAGCCAGGAAAAGCCTAATAATGTAGGACATCAGGTGT		lnc-SLC4A1AP-1:7
CUST_128649_PI430048170	3.38e-05	3.84e-07	-2.41476	mRNA	NM_172201	RefSeq	34364023	34371141	KCNE2	potassium channel%2C voltage gated subfamily E regulatory beta subunit 2		GTGCTGAAGACCTCTTTTACTTTCCGGGCAAGTGAATGTCATTTTAATCAATATCAATGA	NM_172201
CUST_95988_PI430048170	3.38e-05	3.84e-07	0.970033	mRNA	NM_021138	RefSeq	136886512	136926615	TRAF2	TNF receptor-associated factor 2		TTCAGGACCACGTCAAGACTTGTGGCAAGTGTCGAGTCCCTTGCAGATTCCACGCCATCG	NM_021138
CUST_29956_PI430048170	3.39e-05	3.86e-07	-1.32958	ncRNA	NR_038310	RefSeq	7015817	7019654	MIR497HG	mir-497-195 cluster host gene	-	TGTGTATGAGAGCACCTTCTCTTCTGAAACCCCTATACAAGGGAGGGGCCCCTGCGGAGA	NR_038310
CUST_113104_PI430048170	3.4e-05	3.88e-07	-0.546351	ncRNA	lnc-DNAJB5-5:2	lncipedia	35016460	35017505				AAATCTCTCAAAATTTTATAAACAGGCTGGGCATGGTGGCTCATGCCTATTTTATAAACA		lnc-DNAJB5-5:2
CUST_67758_PI430048170	3.4e-05	3.88e-07	1.64082	mRNA	NM_001166357	RefSeq	57230359	57234935	SHMT2	serine hydroxymethyltransferase 2 (mitochondrial)%2C transcript variant 3		CTGGCAAGAGATACTATGGGGGAGCAGAGGTGGTGGATGAAATTGAGCTGCTGTGCCAGC	NM_001166357
CUST_134195_PI430048170	3.4e-05	3.88e-07	-2.55827	mRNA	NM_001291815	RefSeq	130265878	130434123	HMCN2	hemicentin 2		TCGCCCGGCCACACCTGGTGGTGTCATTCTGAACCCTGTTGCAATATAAAGGGATTTTTT	NM_001291815
CUST_73637_PI430048170	3.4e-05	3.88e-07	-1.94629	ncRNA	lnc-MBNL1-3:3	lncipedia	152298981	152300227			+	TAAATCTACGATGGCTGGCTGCAATATGCCTCACTGTTGGTACTAAGAAGTGCCTTTCCT		lnc-MBNL1-3:3
CUST_873_PI430048170	0.0101	0.00127	2.33698	ncRNA	NR_110763	RefSeq	12739485	12749422	LOC100996324	uncharacterized LOC100996324		TCCTAAAAATGGAATGCAGGCCATCTATTCTAGGGAAATAAAGGATTCTAGTTATGTGAA	NR_110763
CUST_119147_PI430048170	3.42e-05	3.92e-07	0.940804	ncRNA	NR_002962	RefSeq	9428765	9428954	SNORA23	small nucleolar RNA%2C H/ACA box 23	+	AAGAGTAACTTGGGATCATAGTACTGGTCTAGTGTTGTCTCTGGACACATCTACCACTGG	NR_002962
CUST_108315_PI430048170	3.42e-05	3.93e-07	1.23498	mRNA	NM_001174129	RefSeq	50985991	51026141	SLC11A2	solute carrier family 11 (proton-coupled divalent metal ion transporter)%2C member 2%2C transcript variant 6		ATATGTACTTTGTAGTGGTTTATGTCCGGGACCTAGGGCATGTGGCATTATATGTGGTGG	NM_001174129
CUST_64737_PI430048170	3.42e-05	3.93e-07	-2.05492	ncRNA	NR_040028	RefSeq	36797562	36828111	ZNF790-AS1	ZNF790 antisense RNA 1%2C transcript variant 2	-	AGAGAACTTTAAGCACTTTTCCAAGAAGAGTGAAGGGCTGGAGAATAAATTGTGAACTAA	NR_040028
CUST_93695_PI430048170	3.44e-05	3.96e-07	-2.13483	ncRNA	lnc-RTN1-3:1	lncipedia	59595975	59606102			-	TGTGGCAAAGATTCAGGCTAAAATCCCAGGCGCTAAGAGGCATGCTGAGTAAACTGATTT		lnc-RTN1-3:1
CUST_88745_PI430048170	3.44e-05	3.96e-07	1.51192	mRNA	NM_025138	RefSeq	39009864	39038076	PROSER1	proline and serine rich 1		ACAATCATCCTTGCAAGAATTACAGCATAATGCGGCTGCGCAGTCAGCATTGTTACAGCA	NM_025138
CUST_134427_PI430048170	3.44e-05	3.97e-07	-2.45063	mRNA	NM_001172173	RefSeq	165469646	165689407	CSRNP3	cysteine-serine-rich nuclear protein 3%2C transcript variant 1		CATATTGTACAATATCTTGTCCATTTGTTTGCAGCAGAGTAAAACCGGTTTCTAAGTTGT	NM_001172173
CUST_79851_PI430048170	3.47e-05	4.01e-07	1.44543	mRNA	NM_006330	RefSeq	54046366	54102017	LYPLA1	lysophospholipase I%2C transcript variant 1		AGATACTGGTAAAAGCTTTGATTGATCAAGAAGTGAAGAATGGCATTCCTTCTAACAGAA	NM_006330
CUST_121584_PI430048170	3.48e-05	4.03e-07	-1.77485	ncRNA	NONHSAT071501	NONCODE	70656784	70658325			-	CTGTTACCTCACCTGCAGACATGACCCTAGTAAATCTAACGTGCTTGGCTTCCCAAAAAA		NONHSAT071501
CUST_123445_PI430048170	3.5e-05	4.06e-07	-2.32702	ncRNA	lnc-PPAP2A-1:1	lncipedia	55421525	55423800			+	GTGTTAACCAGAATCTGTGAAAGTTATCAGAGACCAAACCATACGAAGTAAATTACTAAG		lnc-PPAP2A-1:1
CUST_138722_PI430048170	3.5e-05	4.06e-07	-1.94677	mRNA	NM_024769	RefSeq	123072324	123195299	CLMP	CXADR-like membrane protein		AAGGGAGATTAGATCAGTTTTCTCTTAATATGTCAAGGAAGGTAGCCGGGCATGGTGCCA	NM_024769
CUST_144551_PI430048170	3.5e-05	4.08e-07	-2.87515	mRNA	NM_001003665	RefSeq	226548799	226609214	C1orf95	chromosome 1 open reading frame 95		GGAAATACGGCTTTGGAAACCTTTTTCTTCCTTTCCCTCTTTTCTATGTTGTAATAAACA	NM_001003665
CUST_127072_PI430048170	3.5e-05	4.08e-07	-1.66729	mRNA	NM_001024807	RefSeq	35868498	35879797	APLP1	amyloid beta (A4) precursor-like protein 1%2C transcript variant 1		TATTTATGGCTCTTTAAGGTGACCGCCACCTTGGTCCTAGTGTCTATTCCCTGGAATTCA	NM_001024807
CUST_60931_PI430048170	0.000475	1.97e-05	2.32192	ncRNA	lnc-BMP4-3:2	lncipedia	53573227	53613938				GAGATCTCCACGTCAATCAAACTGCTTATACCCATGCATGACTTCATTATATGTATTTTT		lnc-BMP4-3:2
CUST_100788_PI430048170	6.23e-05	1.02e-06	2.32175	ncRNA	lnc-TMEM196-3:2	lncipedia	20170227	20217352				GCACAGAAGTGAAAAACAGAGAAGAATTATCATTTTAAGCAGCAACTGATGTTCATTGGG		lnc-TMEM196-3:2
CUST_71244_PI430048170	0.0103	0.00131	2.3189	ncRNA	NR_034104	RefSeq	44656450	44671739	LINC01260	long intergenic non-protein coding RNA 1260		TGCAAGAAACTCAGCCGGTCATGTTGAACAAACTAAGAGTGCCAGGAAGTTAATGTCCTG	NR_034104
CUST_75699_PI430048170	3.5e-05	4.09e-07	-2.03908	mRNA	NM_001256732	RefSeq	81417359	81751253	SSBP2	single-stranded DNA binding protein 2%2C transcript variant 1		TGTGATCCATTACCAAGTCTCCTCATGAAAACCACAGTGAGTCAGCCCTTCACAGAACTA	NM_001256732
CUST_141344_PI430048170	3.52e-05	4.12e-07	1.24238	mRNA	NM_198920	RefSeq	82892397	83065841	UBE3D	ubiquitin protein ligase E3D%2C transcript variant 1		CAGTGAGGAATTTTATTGGTGGAACTGAATGTTAACTGCTGTAAATCCTAGGAAATAAAC	NM_198920
CUST_135833_PI430048170	3.53e-05	4.14e-07	-2.50321	mRNA	NM_024692	RefSeq	29115425	29183813	CLIP4	CAP-GLY domain containing linker protein family%2C member 4%2C transcript variant 1		TTAAAGTTCACTTCTTGAGCATCAATAAAAAGGGAAGCTGTGTGGTTTTGGAATGGTAAA	NM_024692
CUST_40827_PI430048170	0.00331	0.000285	2.30801	ncRNA	ENST00000561362	ENSEMBL_GENCODE	99395179	99396593	RP11-20G13.3			CATCCATTTGCAGCAAATTTTGCCTACGGTATGAAATAGGAGTTCAATTTGACATTGAAT		ENST00000561362
CUST_12811_PI430048170	0.000517	2.24e-05	2.30694	ncRNA	ENST00000457457	ENSEMBL_GENCODE	43001355	43006060	AC016735.1			TGGCCTGGAACCTAAGACTTGTCCAAAGATGTCACAGAGAGTAAAATGAGAAAAATCCAG		ENST00000457457
CUST_141894_PI430048170	3.53e-05	4.16e-07	-4.48136	mRNA	NM_013363	RefSeq	142817859	142889203	PCOLCE2	procollagen C-endopeptidase enhancer 2		CCTTTGCCCTGAGGTGTTACAATCTTGTCTTGCGTTTTCTAAATCAATGCTTAATAAAAT	NM_013363
CUST_127022_PI430048170	3.54e-05	4.17e-07	-1.70674	mRNA	NM_001256732	RefSeq	81417359	81751253	SSBP2	single-stranded DNA binding protein 2%2C transcript variant 1		TTGACTCTTCTCCATTGTTACCGATCTTGAAATTCTTTTCTTCGCCTTCTGAGAAGGTAT	NM_001256732
CUST_139060_PI430048170	3.56e-05	4.21e-07	-3.84596	mRNA	NM_001297646	RefSeq	1919568	1938706	TNNT3	troponin T type 3 (skeletal%2C fast)%2C transcript variant 5		TGGAGATTGACAAGTTCGAGTTTGGGGAGAAGCTGAAACGCCAGAAATATGACATCACCA	NM_001297646
CUST_59898_PI430048170	0.000104	2.25e-06	2.29345	ncRNA	lnc-SACS-5:2	lncipedia	22838968	22844224				TAAAATCCACTACACATGCTGTTGTTGTTGAGTGCTAATTGCCTGGGAACAATAAAAATA		lnc-SACS-5:2
CUST_128096_PI430048170	3.57e-05	4.23e-07	-2.95601	mRNA	NM_133464	RefSeq	111525158	111544432	ZNF483	zinc finger protein 483%2C transcript variant 1		TGCAATTGGAGTGTAAACATTCTGTGTGGCAACAGTTAAAAGCTGTTATAACAATTTGCT	NM_133464
CUST_122118_PI430048170	4.84e-05	6.76e-07	2.29278	ncRNA	NONHSAT079642	NONCODE	38138044	38138128			-	CTGTGTTCCTGGAGCATTTGTTGACCGCCAACTGACAACATGCTAGGTAGTGACCTAACC		NONHSAT079642
CUST_136303_PI430048170	3.58e-05	4.25e-07	0.921943	mRNA	NM_016491	RefSeq	54200166	54218383	MRPL37	mitochondrial ribosomal protein L37		TTCAAGCCAGAGACATTCAGAAAGTTTTTAGCTCTATATTTGCATGGTGCTGCGTGAGCG	NM_016491
CUST_120587_PI430048170	3.61e-05	4.28e-07	-1.59593	ncRNA	ENST00000621980	ENSEMBL_GENCODE	84622015	84623237	RP11-182J1.3		+	TATACGGGACTTGACTCAGACCACTAAAATGACAGTGTCCTGGAAATGAGGATGAGCAAG		ENST00000621980
CUST_142772_PI430048170	3.61e-05	4.3e-07	1.12258	mRNA	NM_003655	RefSeq	79833155	79839414	CBX4	chromobox homolog 4		CGACCACCCCCCTTCGGGCTGCTATATATATATTTATTTGTAGGTATTTATATATTGAAA	NM_003655
CUST_72055_PI430048170	0.00832	0.00098	2.29259	ncRNA	lnc-DGCR2-3:1	lncipedia	19018042	19018916				CCTGTTGTATGTAAAGCACCCAGCATGGATGCACAGCAGGAGAGACACAAGCCCCAAGAC		lnc-DGCR2-3:1
CUST_98416_PI430048170	3.61e-05	4.31e-07	1.96252	mRNA	NM_001809	RefSeq	26786013	26794587	CENPA	centromere protein A%2C transcript variant 1		AAATATGTGTTAAATTCACTCGTGGTGTGGACTTCAATTGGCAAGCCCAGGCCCTATTGG	NM_001809
CUST_40153_PI430048170	3.61e-05	4.32e-07	0.601491	ncRNA	NR_003667	RefSeq	33500755	33511166	SUGT1P1	SUGT1 pseudogene 1		ACAAAAATTAGTGCAGATGCTAATTTCAGTGACTGGATTAAAAGGTGTCAAGAAGCTCAG	NR_003667
CUST_50109_PI430048170	3.61e-05	4.32e-07	-1.22808	mRNA	NM_183372	RefSeq	148102045	148152190	NBPF11	neuroblastoma breakpoint family%2C member 11%2C transcript variant 3		GTTCCTTTTATGCATTGGAGGAAAAACATGTTGGCTTTTCTCTTGACGTGGGAGAAATTG	NM_183372
CUST_112573_PI430048170	3.56e-05	4.21e-07	2.28936	ncRNA	lnc-BMX-2:1	lncipedia	15585355	15590962			-	GGAACTGTCAAAGAGTACAGATTTGTCCAAAATCTACCCCACATATCACCTATATTTAAA		lnc-BMX-2:1
CUST_129320_PI430048170	3.61e-05	4.32e-07	-2.90878	mRNA	NM_017639	RefSeq	154234374	154391297	DCHS2	dachsous cadherin-related 2%2C transcript variant 1		CAGCAACTCGAGATTGGGCTCATTTTTATCTAAAAGCAAGTGATGTAATTTAGTTAGAGT	NM_017639
CUST_52520_PI430048170	3.61e-05	4.33e-07	-3.42001	mRNA	NM_001204087	RefSeq	154697465	154870278	KCNN3	potassium channel%2C calcium activated intermediate/small conductance subfamily N alpha%2C member 3%2C transcript variant 3		ACTCCAACCTGCAGTTAGGATCCCAAAGAGATGTTGACATTTATAGCCAAAAAGAAAAAG	NM_001204087
CUST_111918_PI430048170	3.62e-05	4.35e-07	-2.42206	mRNA	NM_181723	RefSeq	17027237	17122639	MICU3	mitochondrial calcium uptake family%2C member 3		CAGAAACACCACCAGTTTGGAAAGGCTCATCGAAGCTATTTCGAAATCTTAAAGAAAAAG	NM_181723
CUST_138844_PI430048170	3.63e-05	4.37e-07	1.92466	mRNA	NM_006569	RefSeq	27100593	27119127	CGREF1	cell growth regulator with EF-hand domain 1%2C transcript variant 1		TAAGTTAAGGGGCAGATTACCAATAAAGAACTGAATGAATTCATCCCCCCGGCCACCTCT	NM_006569
CUST_113142_PI430048170	3.63e-05	4.37e-07	0.97474	ncRNA	lnc-CDRT15L2-5:1	lncipedia	20775641	20776905				CGAAGATTTTAAATGGGAAGGTTCTGAAATGCAGTCAAGGCTGCCGGAAAGTACAGACAA		lnc-CDRT15L2-5:1
CUST_142949_PI430048170	3.64e-05	4.4e-07	-2.23733	mRNA	NM_181723	RefSeq	17027237	17122639	MICU3	mitochondrial calcium uptake family%2C member 3		GTACTGACTACATGTATGCTGTTATTGTCAGTGTTTCCTTCTATAAACTGTTCTTTGGAA	NM_181723
CUST_124196_PI430048170	3.64e-05	4.4e-07	-1.53245	ncRNA	NR_034109	RefSeq	111483471	111602294	TRAF3IP2-AS1	TRAF3IP2 antisense RNA 1%2C transcript variant 2	-	GGACTAATGGGAACACACTGACTCCATCACATTAGAAGTTATAATAAACATTTAGAGAAC	NR_034109
CUST_136879_PI430048170	3.64e-05	4.4e-07	1.23714	mRNA	NM_018715	RefSeq	17406754	17439754	RCC2	regulator of chromosome condensation 2%2C transcript variant 1		TCCCGCAGCTCCTTCTGGCTTAGATTGAAAAATGGGCTTCCTAATGGGTTAAATCCTTTA	NM_018715
CUST_138690_PI430048170	3.64e-05	4.41e-07	-4.53833	mRNA	NM_001304433	RefSeq	113399609	113414393	LOC101928841	collagen alpha-1(II) chain-like		GAGTTACGGTCTTTCGGTTGTGTATTAGGCTACAGCTATTTATTAAATTTGTTCTTGTTC	NM_001304433
CUST_112450_PI430048170	3.64e-05	4.42e-07	0.790871	ncRNA	lnc-FA2H-3:1	lncipedia	74908733	74909625			-	CTGAGTTTGCTTTTGGACAGTGCATTTCAGTTCTTCAGTAAACTCCCATTATAAGATTTA		lnc-FA2H-3:1
CUST_132907_PI430048170	3.65e-05	4.43e-07	-2.14315	mRNA	NM_018945	RefSeq	135851695	136195571	PDE7B	phosphodiesterase 7B		GCTCAAAATGTGGCCTAAGTAGCCATTGGCATGTCTAGATGAACAAATAAAAATAAAGAT	NM_018945
CUST_136485_PI430048170	3.66e-05	4.45e-07	1.43842	mRNA	NM_006452	RefSeq	56435748	56461368	PAICS	phosphoribosylaminoimidazole carboxylase%2C phosphoribosylaminoimidazole succinocarboxamide synthetase%2C transcript variant 2		ACACTGTGTTATGCTCTGATGTGCTATGCTTAGCTATCTGTCAGAGATTAGTAAATTATA	NM_006452
CUST_118866_PI430048170	0.00306	0.000257	2.28471	ncRNA	NR_024380	RefSeq	42331865	42368045	LOC441666	zinc finger protein 91 pseudogene		CCGGTGTTCACAGGTGAGAGGAATAAATCAGTCAGAATTTCTTGTCTTTGTAAAACCAAA	NR_024380
CUST_135465_PI430048170	3.71e-05	4.51e-07	1.34671	mRNA	NM_024531	RefSeq	144358615	144361286	SLC52A2	solute carrier family 52 (riboflavin transporter)%2C member 2%2C transcript variant 1		CCTGGGACCTACATGTGGTTTGCGTAATAAAACATTTGTATTTAATGAGTTGGCATTAAA	NM_024531
CUST_58045_PI430048170	3.71e-05	4.53e-07	0.785097	ncRNA	lnc-VSTM5-1:13	lncipedia	93730199	93732501			-	AGTCAGCATGTATTTTTGGCTCGAAGTTTCTCTAGTGTTTTCTGTGGAAGGAATAAAAAT		lnc-VSTM5-1:13
CUST_78792_PI430048170	3.72e-05	4.55e-07	-2.22397	ncRNA	NR_003551	RefSeq	90119399	90125600	DPY19L2P4	DPY19L2 pseudogene 4		ATGGCCCCAAAGCTTGTTGGTCATAGTCTATTTCTGGCCATTATCTTCTTAAATAATCTA	NR_003551
CUST_28555_PI430048170	3.73e-05	4.56e-07	-4.8697	ncRNA	ENST00000564527	ENSEMBL_GENCODE	99139317	99145370	RP11-6O2.3		-	GGGGGCTTCTAATGGAGTAGCGGAGAAAGATATTTTTAAAATACATAAATAAACGTGTCA		ENST00000564527
CUST_115917_PI430048170	0.000185	5.3e-06	2.28327	ncRNA	lnc-TK1-2:1	lncipedia	78223981	78224432			+	TTGTTAAACAGTAGAGGAGCCAGGGACTCTGTCTCCATTCTCTCATCACACACAAGTCAT		lnc-TK1-2:1
CUST_141276_PI430048170	3.75e-05	4.59e-07	-1.85346	mRNA	NM_001199295	RefSeq	57527324	57540876	ZNF549	zinc finger protein 549%2C transcript variant 1		CCCAGTTAATGGGTTTTGATAGTCATGTTATCTCAGTAAGTGTCTTGTCTTAGAAATATG	NM_001199295
CUST_135913_PI430048170	3.76e-05	4.61e-07	1.96554	mRNA	NM_003641	RefSeq	313990	315272	IFITM1	interferon induced transmembrane protein 1		TTTATACCCACACACCTGTCTACAGTGTCATTCAATAAAGTGCACGTGCTTGTGAAAAAA	NM_003641
CUST_20848_PI430048170	0.00798	0.000924	2.27745	ncRNA	ENST00000602362	ENSEMBL_GENCODE	54554583	54558920	RP11-53M11.3			CACTTCATGGTGTTGAACTAAACAAACACATACTTCTCCAGACAAATATTAAAACTGGTG		ENST00000602362
CUST_38240_PI430048170	0.0074	0.000838	2.27587	ncRNA	lnc-OR10H1-1:1	lncipedia	15829361	15835418			-	TATAATCCTTTTTATAGGCGGCAGGTCTTAAGAGATGAGGGTCCAGAGGAACGGATGAAG		lnc-OR10H1-1:1
CUST_111256_PI430048170	0.00021	6.52e-06	2.27249	ncRNA	lnc-ALB-7:1	lncipedia	73104364	73110758			-	CCCAATGTGATAATCTTTCAAATAAAAATATGGGCTGTAGTTCAGGAAAAAAGTGGCTTC		lnc-ALB-7:1
CUST_17790_PI430048170	0.000299	1.05e-05	2.26711	ncRNA	ENST00000514853	ENSEMBL_GENCODE	127703390	127941634	LINC01183		+	CTCCCACCTGTGGAAGAAGGTGATAGAAAAATTAGCCTGATAATGGAACTGTCAACCCAG		ENST00000514853
CUST_80427_PI430048170	5.9e-05	9.24e-07	2.25716	ncRNA	lnc-CTD-2517M22.14.1-2:9	lncipedia	144511324	144512772			+	TTGACCGCTGAGGAGAAGGACCAGATATGTGACTTCCTCTATGGCCGTGTGCAGGCCCGG		lnc-CTD-2517M22.14.1-2:9
CUST_140784_PI430048170	3.81e-05	4.71e-07	0.97358	mRNA	NM_001198842	RefSeq	69585681	69601577	CCT2	chaperonin containing TCP1%2C subunit 2 (beta)%2C transcript variant 2		CCTTCGCTTTAACATAGGTCTAATTTATTTGCCGTGTCATTTTCCATACAAATCAGTTGA	NM_001198842
CUST_135828_PI430048170	3.82e-05	4.72e-07	0.591821	mRNA	NM_006360	RefSeq	32583766	32602873	EIF3M	eukaryotic translation initiation factor 3%2C subunit M		GGAAACAAAATCTGAACAAAGTGAAAAACAGCCTTTTGAGTCTTTCTGATACCTGAGTTT	NM_006360
CUST_57160_PI430048170	3.84e-05	4.76e-07	0.986239	ncRNA	lnc-ARFIP2-2:1	lncipedia	6488185	6489377				GGTATCAAAATGACACTGTCAGCTCTCCTGGATGGCAAGAATAACAATGCCAGTGGTTAC		lnc-ARFIP2-2:1
CUST_114898_PI430048170	3.84e-05	4.76e-07	-1.84222	ncRNA	ENST00000504402	ENSEMBL_GENCODE	7094571	7103329	FLJ36777			GAGTTGGCCTCAGCCAAGTGAAATGGGAATCAGGACCATTACAAAGAAATTCAATTAAAA		ENST00000504402
CUST_52959_PI430048170	1.51e-05	1.13e-07	2.25423	ncRNA	ENST00000552933	ENSEMBL_GENCODE	48998367	49019235	RP11-386G11.5		-	TTTAAAAAAGGGAACCATTTCATCCGTTGTTACGAAGGACCAACCTTGCTGTACAGGATA		ENST00000552933
CUST_35669_PI430048170	3.87e-05	4.81e-07	0.871677	ncRNA	ENST00000516131	ENSEMBL_GENCODE	19249873	19249966	SNORA15		-	CCCTTTAGAATGACTGATGGTATGCTAAGGTTTTTCGTGGCATATTATTATTAAAGGTGA		ENST00000516131
CUST_142831_PI430048170	3.92e-05	4.89e-07	-6.80553	mRNA	NM_080390	RefSeq	102125687	102127712	TCEAL2	transcription elongation factor A (SII)-like 2		TTTCACACATGTGCATTGCAGAGACGTCATGATTCGTGGAAAAATAAAGCAGCTTATAAT	NM_080390
CUST_101425_PI430048170	3.93e-05	4.9e-07	2.78743	mRNA	NM_016269	RefSeq	108047544	108168956	LEF1	lymphoid enhancer-binding factor 1%2C transcript variant 1		TTGCCCAAAACTGTCATCCTAACGTTTGTCATTCCAGTTTGAGTTAATGTGCTGAGCATT	NM_016269
CUST_64091_PI430048170	3.93e-05	4.91e-07	-2.08484	ncRNA	lnc-TSHZ1-4:1	lncipedia	75455903	75456741				ACGATTTCACTCCTCACCAAAGACACTTCTTTAGGGCGATTTTAGGATTCTATCAACGCT		lnc-TSHZ1-4:1
CUST_61061_PI430048170	0.0133	0.00184	2.24707	ncRNA	lnc-TTC9-3:1	lncipedia	70594551	70595770			-	CAAATCTCAGGACCTCGCCAAGATCACAGGAGACATCCTAATACGAAGAGCTGGCTCAGA		lnc-TTC9-3:1
CUST_53029_PI430048170	8.97e-05	1.77e-06	2.24363	ncRNA	ENST00000577281	ENSEMBL_GENCODE	72425939	72428852	RP11-57A1.1			CAGAAAAAGGGGAGTAATTCATTTCCTATCCCAATTATGGATATAGCAGACTGAAGAATA		ENST00000577281
CUST_111469_PI430048170	3.96e-05	4.96e-07	-3.13718	mRNA	NM_015621	RefSeq	151181051	151224093	CCDC69	coiled-coil domain containing 69		CGATACACTAGTTTATTGAACTAATGTCCAGGAGTAGACATGATTGGTGGCCAAGTTATT	NM_015621
CUST_139763_PI430048170	3.96e-05	4.97e-07	0.669095	mRNA	NM_005663	RefSeq	1982713	2009235	NELFA	negative elongation factor complex member A		CAGTCTTTGGGTACCTATTTTCATTGTAAAACTATCTGAACCATTAAAGTCGAGCTTTTC	NM_005663
CUST_4403_PI430048170	0.00817	0.000956	2.23964	ncRNA	NR_104091	RefSeq	168903904	169087005	LINC00970	long intergenic non-protein coding RNA 970		TAATCCTCTTTTAAGAAGAAGGGGTATATATTTACCTAGGGAATTCCCTAGAGGAGAAGA	NR_104091
CUST_136540_PI430048170	3.98e-05	5.01e-07	2.07466	mRNA	NM_001080410	RefSeq	73254681	73269630	FBXO41	F-box protein 41		TCAGAGAATTTATGGCTCTGTATCCAATAAAAAAGATGGTGAAACTGGTCTATCTGCCAA	NM_001080410
CUST_132659_PI430048170	3.98e-05	5.01e-07	-2.7339	mRNA	NM_004205	RefSeq	119355214	119381726	USP2	ubiquitin specific peptidase 2%2C transcript variant 1		TTACTGTGTAAGCAAGAGTAGAAGAATGTCTAATGTACAGTGGAACCTTGTACAGAATAA	NM_004205
CUST_62535_PI430048170	3.98e-05	5.02e-07	1.10987	mRNA	NM_016310	RefSeq	46978	53632	POLR3K	polymerase (RNA) III (DNA directed) polypeptide K%2C 12.3 kDa		TTGCTAGTGTGGTGGAAAGATAAACCTTTTGAGGTGAAGAGCCAGGGGGTCAGGAAATAT	NM_016310
CUST_60203_PI430048170	0.000157	4.19e-06	2.23763	ncRNA	lnc-RNASEH2B-3:30	lncipedia	50185879	50390291				CAAGCTGCTTGGGTATCATTAATGAAGACAAAGTGGGATTATTATTTTCTATGATTTGGG		lnc-RNASEH2B-3:30
CUST_143531_PI430048170	3.99e-05	5.04e-07	-2.14678	mRNA	NM_024870	RefSeq	67952367	68231662	PREX2	phosphatidylinositol-3%2C4%2C5-trisphosphate-dependent Rac exchange factor 2%2C transcript variant 1		ATGTCTCTCTGTATTGACATTAAGTATTCACTTTTAGAGTAAAATCCATCCCTGGGACAT	NM_024870
CUST_89330_PI430048170	0.00187	0.000131	2.23171	ncRNA	lnc-PYGB-1:1	lncipedia	25413456	25417246			+	AGTGGATTTCAATATCGGTTTATATGTTCTAGGAGGATGGACTCAGACAAGTTCTGGAGG		lnc-PYGB-1:1
CUST_97885_PI430048170	4.07e-05	5.16e-07	-3.49886	ncRNA	lnc-DNAJB4-3:1	lncipedia	77926568	77935970			+	GTTAGCAGCATTTTCCTTTATGACTAAAAGGTGGGTTTTCATAACGTTTTCTTAGGATGA		lnc-DNAJB4-3:1
CUST_138846_PI430048170	4.07e-05	5.16e-07	-1.28596	mRNA	NM_015113	RefSeq	4004444	4142959	ZZEF1	zinc finger%2C ZZ-type with EF-hand domain 1		GAGTGAGTTCAGCCTGTAAAAAGGATGTTAAGCTGTGGGTAAAATATGCAAACGAAAAGA	NM_015113
CUST_52826_PI430048170	4.11e-05	5.22e-07	-2.67033	ncRNA	NR_037870	RefSeq	159195984	159202422	CADM3-AS1	CADM3 antisense RNA 1	+	GCCTAGCAAACCTCCTAGCACATAGGAAAGACCTAATACATATTTTTTACAGAACAAATA	NR_037870
CUST_138334_PI430048170	4.13e-05	5.25e-07	1.88115	mRNA	NM_014573	RefSeq	28319094	28328685	TMEM97	transmembrane protein 97		TTTACAAACTGCTTAGTTCCAACTAAGCATAAGAGGTGAGAACGTACACTGCAGGGCCAC	NM_014573
CUST_16771_PI430048170	4.13e-05	5.26e-07	-3.01277	ncRNA	ENST00000515376	ENSEMBL_GENCODE	173530460	173591324	HAND2-AS1		+	TCGAAAGAACATCAAGCCTGGAAGGTGACAGAAGGAGCAATGTGTTCTTGAAGATGTCAC		ENST00000515376
CUST_125135_PI430048170	0.00559	0.000576	2.23052	ncRNA	NONHSAT122948	NONCODE	117564669	117564787			+	ACTCTAATGTCTGCAAAGCACTTGCGTATGTAATGATGCTCAGTGTCATAGGAGCAGGCA		NONHSAT122948
CUST_124636_PI430048170	0.0103	0.00131	2.22825	ncRNA	NR_103538	RefSeq	28943783	28944538	LINC01556	long intergenic non-protein coding RNA 1556		GTACTACGTAGTTTTGTCATCCAAAGTGTTTTAGAAGTGAATTGAATCATAGTTACGCCT	NR_103538
CUST_40646_PI430048170	0.000299	1.05e-05	2.22748	ncRNA	NR_033928	RefSeq	23225220	23230926	LOC389641	uncharacterized LOC389641		TAACCTGTTAAGAGTCTTGAAAGTCCTTAAACCACGGGAGACTATCTGGCACATGACACG	NR_033928
CUST_10830_PI430048170	0.000138	3.46e-06	2.21724	ncRNA	NR_047498	RefSeq	47179249	47180339	LINC00853	long intergenic non-protein coding RNA 853		TAGTCCTGATCTAATGGATCCTTGAAGCACAATAAACAGATAGTATTTCTGCATGTGTCA	NR_047498
CUST_56694_PI430048170	0.00133	8.27e-05	2.21603	ncRNA	lnc-TBC1D12-2:3	lncipedia	94569194	94574448			+	AGCCAGTAATGTCTATAGGCTTATTTCTGCCTGAAGGCTACTAGTTTTATCTTGAGAATC		lnc-TBC1D12-2:3
CUST_55861_PI430048170	4.16e-05	5.33e-07	-1.8184	ncRNA	ENST00000451601	ENSEMBL_GENCODE	628638	631255	RP11-809C18.3		-	AAGGGGGTCAGATATCAATGCTAACATTTGTGCTGACTCAATTAATTCAAACGATTCACA		ENST00000451601
CUST_89777_PI430048170	4.16e-05	5.34e-07	-0.970614	ncRNA	lnc-AC091435.1-6:1	lncipedia	38528671	38530917			-	AGTATAAGGTGAGCCTTCAGAACAATCTGAACACCATCTGGAATTCCTCTCCTAACCTAG		lnc-AC091435.1-6:1
CUST_142250_PI430048170	4.16e-05	5.35e-07	1.55452	mRNA	NM_001161357	RefSeq	17747717	17788568	FCHO1	FCH domain only 1%2C transcript variant 1		CCCCACACAGGTCCCGGCCTTTTAATGTTCTTTGAATAAACACTTTATTTTCTAATAAAA	NM_001161357
CUST_136022_PI430048170	4.21e-05	5.42e-07	-4.6444	mRNA	NM_021257	RefSeq	77265490	77271312	NGB	neuroglobin		TCTGTGCTGACTGTGGTCCTATAAATTCATGAGAAATAAACTGGTTCTGTGTGCAAAAAA	NM_021257
CUST_95349_PI430048170	4.22e-05	5.44e-07	0.583306	mRNA	NM_023007	RefSeq	227731188	227735411	JMJD4	jumonji domain containing 4%2C transcript variant 1		CCCGTTCCATGCTGACATCTTCCGCTCCTTCAGCTGGTCTGTCAATGTCTGTGGGAGGAA	NM_023007
CUST_130868_PI430048170	4.22e-05	5.44e-07	0.943587	mRNA	NM_024638	RefSeq	114056734	114088421	QTRTD1	queuine tRNA-ribosyltransferase domain containing 1%2C transcript variant 1		AAACTGTGTCCAATATCGTTCAGTTTCCTGGGTCTTTTTCTTATTAGCACATTTGAGAAA	NM_024638
CUST_120972_PI430048170	7.69e-05	1.42e-06	2.2124	ncRNA	lnc-AP002478.1-1:5	lncipedia	3604969	3608464			-	TGCTGGTTTTGGTAAATTCATTGCCTTACCCTTGGACCTGGTATTGTTTGAGAAAATAAA		lnc-AP002478.1-1:5
CUST_47655_PI430048170	4.24e-05	5.49e-07	-2.13584	ncRNA	lnc-ANKRD50-4:3	lncipedia	124025343	124028291				CAGGGCATAGTGTTTCTGTATCAGAACTAGAATCCTCTACTTCACTTTCTTCAGCTATTA		lnc-ANKRD50-4:3
CUST_124910_PI430048170	4.24e-05	5.49e-07	-1.17727	ncRNA	lnc-NEUROD6-7:3	lncipedia	31783526	31786896			-	CCCCCAGCATCTAGTAATGCATAAGTACTTGTATGTTCTTCTGATTACCAAATAAAAACA		lnc-NEUROD6-7:3
CUST_103601_PI430048170	4.25e-05	5.51e-07	-1.41475	ncRNA	lnc-C9orf156-2:1	lncipedia	97876329	97895821				CTCTATTACCACTGATTTCATTCCTGCCAGAGTGAGTATACTTCAACCCAAGTGGGACTC		lnc-C9orf156-2:1
CUST_141602_PI430048170	4.25e-05	5.51e-07	-1.15714	mRNA	NM_003019	RefSeq	79937739	79949105	SFTPD	surfactant protein D		CTTAGACCCTCATGCTGCCAATATCCTAATAAAAAGGTGACCATCTGTGCCGGGAAAAAA	NM_003019
CUST_16282_PI430048170	0.0283	0.00519	2.20946	ncRNA	ENST00000612706	ENSEMBL_GENCODE	89681523	89686704	RP11-115D19.1			GCTGAGTTGAACCATGAAATGAATTGTATTGAGCAACATCAACAACATAAATATTCTGGG		ENST00000612706
CUST_126055_PI430048170	4.29e-05	5.58e-07	-2.60942	ncRNA	NONHSAT137659	NONCODE	75368427	75371192			-	GAAATATCGACAAATGCTGGCCAGCTTTATCTTCCTATATCCTTCATTAAAAGTATATGC		NONHSAT137659
CUST_137327_PI430048170	4.3e-05	5.6e-07	-3.19557	mRNA	NM_152447	RefSeq	41607560	41904551	LRFN5	leucine rich repeat and fibronectin type III domain containing 5		ATGTTGAATCCCAAAACACTAACAGGAACAACTCAACTGCCTTGCAGTTAGCTAGCCGTC	NM_152447
CUST_35856_PI430048170	4.3e-05	5.6e-07	0.734208	ncRNA	NR_037420	RefSeq	70529498	70529599	SNORD111B	small nucleolar RNA%2C C/D box 111B	+	CATTCATGTCTCTTCTCTGATAAATTCTTGAAGAAAATTTTTGTGTGTCTGATCAGGCCT	NR_037420
CUST_25425_PI430048170	4.3e-05	5.61e-07	-1.92289	ncRNA	ENST00000602731	ENSEMBL_GENCODE	85263544	85264457	RP11-193M21.1			GAGGATGATGAATGGTGCTGATGCTCCTAAATTTGTAGGTAATGATTGATATATATGTCA		ENST00000602731
CUST_103148_PI430048170	4.3e-05	5.62e-07	-1.40666	ncRNA	lnc-CXorf26-2:2	lncipedia	75889347	75890037				GCTGATTCAGTAACCAGTTTCATGCTGTGTCATTCACACTCAGTACTTAATACTGCCATA		lnc-CXorf26-2:2
CUST_82086_PI430048170	4.33e-05	5.66e-07	1.1191	mRNA	NM_014060	RefSeq	120603888	120621161	MCTS1	malignant T cell amplified sequence 1%2C transcript variant 1		AAGATCCTGTCAAAATAGTCCGATGCCATGAACATATAGAAATCCTTACAGTAAATGGAG	NM_014060
CUST_128894_PI430048170	4.33e-05	5.68e-07	-1.61803	mRNA	NM_006888	RefSeq	90396982	90408275	CALM1	calmodulin 1 (phosphorylase kinase%2C delta)		CTATTTGAAAAGGAGATGTACTTGGACGTTTCTGTAAATCTTGAGATAAACTGTTTGGAG	NM_006888
CUST_48604_PI430048170	9.74e-05	2.03e-06	2.20816	ncRNA	ENST00000511929	ENSEMBL_GENCODE	23225233	23230915	RP11-1149O23.4			ACACTCATTGAGAATATCCTTTAAAAATAGTAAGTGAAGACGTTGTGGCAGGTTGAACTT		ENST00000511929
CUST_142546_PI430048170	4.35e-05	5.71e-07	-1.04459	mRNA	NM_001171894	RefSeq	99565927	99716424	MEF2A	myocyte enhancer factor 2A%2C transcript variant 5		CAAGCTGGACTTTGTTGCCATCCTTGAGATGAACCTTTTAAGAAAAATAAGTTAATCTCA	NM_001171894
CUST_136367_PI430048170	4.35e-05	5.72e-07	1.00641	mRNA	NM_080621	RefSeq	63974112	63979642	SAMD10	sterile alpha motif domain containing 10		GCACGCCTGTCTCGTCTTCCTTGTTTTGCTGCACTCACTTTTTTATACTCTGACAAAAAA	NM_080621
CUST_127999_PI430048170	4.36e-05	5.74e-07	-3.55429	mRNA	NM_001289987	RefSeq	75308083	75493829	FILIP1	filamin A interacting protein 1%2C transcript variant 1		ACAGGGCCTGGACCTCTAAAATTTTGCAAAAACAAAAGGTTCTAAGATGATTTCAGGAAA	NM_001289987
CUST_83824_PI430048170	0.000174	4.85e-06	2.20806	ncRNA	lnc-PAQR4-2:1	lncipedia	2973248	2973492			+	CAGAACACATGGACTTGGAGGCAGATTTGAAATAAACTTTTAGTAAATGTAAGCCTTTCT		lnc-PAQR4-2:1
CUST_134541_PI430048170	4.4e-05	5.8e-07	-1.68498	mRNA	NM_153634	RefSeq	38652199	38905618	CPNE8	copine VIII		GTCCCAAGTTGACCTAGGGTGACTTTTATAAGCATGAAACTATTTTACTGGAAAGAAAAA	NM_153634
CUST_106836_PI430048170	4.4e-05	5.81e-07	-1.42312	mRNA	NM_003884	RefSeq	20040031	20154404	KAT2B	K(lysine) acetyltransferase 2B		ATTCCGATGGAATTAATCAACGAGGTTATGTCTACCATCACGGACCCTGCAGCAATGCTT	NM_003884
CUST_60511_PI430048170	0.000951	5.2e-05	2.20358	ncRNA	NR_034119	RefSeq	106376562	106377792	LINC00460	long intergenic non-protein coding RNA 460		GTGGGAGGCGTCTGTGTAGCAATTGCTGGAATCACTTGTGGCATTGTAGAAAGACTGAGC	NR_034119
CUST_91681_PI430048170	4.44e-05	5.88e-07	-3.10553	mRNA	NM_033655	RefSeq	39072766	39288303	CNTNAP3	contactin associated protein-like 3		AAATAAATACCAATGGCTGCAAATTGACCTTGGAGAGAGAATGGAGGTCACTGCTGTCGC	NM_033655
CUST_111140_PI430048170	0.00676	0.000742	2.19833	ncRNA	lnc-CCNL1-2:1	lncipedia	157162662	157163932				CCCAATATGATGAGCTGGCATGAAGAACCAATAGGTGCTGGACAAGTACTGGTCTTAACA		lnc-CCNL1-2:1
CUST_47375_PI430048170	0.000185	5.32e-06	2.19495	ncRNA	lnc-WDR26-1:4	lncipedia	224608296	224615447				ACTGGCAAATCTCGGTGAAAGAGTAGACGCACTTCATGGATTGGAGTGAATCTTAGAGCA		lnc-WDR26-1:4
CUST_128014_PI430048170	4.44e-05	5.91e-07	-2.4682	mRNA	NM_013443	RefSeq	127885320	127899648	ST6GALNAC6	ST6 (alpha-N-acetyl-neuraminyl-2%2C3-beta-galactosyl-1%2C3)-N-acetylgalactosaminide alpha-2%2C6-sialyltransferase 6%2C transcript variant 1		CCCAGACTTGGTTTTGTAATGATTTGTACAGGAATAAACACACCTACGCTCCGGAAAAAA	NM_013443
CUST_118541_PI430048170	4.44e-05	5.91e-07	-2.80103	ncRNA	NR_037870	RefSeq	159195984	159202422	CADM3-AS1	CADM3 antisense RNA 1	+	TCCTTGGTGGGCCCTAAGAGATGTCTTAACAGAAAGCTGAGAAGGGAAATGAGTGGTTTA	NR_037870
CUST_47478_PI430048170	4.44e-05	5.92e-07	0.632523	ncRNA	NR_003667	RefSeq	33500755	33511166	SUGT1P1	SUGT1 pseudogene 1		CAAAAATTAGTGCAGATGCTAATTTCAGTGACTGGATTAAAAGGTGTCAAGAAGCTCAGA	NR_003667
CUST_121749_PI430048170	4.44e-05	5.92e-07	0.943105	ncRNA	NONHSAT074276	NONCODE	130082091	130082220				ATTAAGGAATAACCACTTCCTGAGGAAGAACCATGTACCAGCACGATTCCTAATCCAGAG		NONHSAT074276
CUST_98414_PI430048170	4.44e-05	5.93e-07	-1.09475	ncRNA	lnc-AC008073.6.1-2:10	lncipedia	24078904	24080955			-	ACTTCCTAATATACAGCTGCTCCAAGCTTTTCTGCCATTTGAAGCTTCTTCTGGGAGCCA		lnc-AC008073.6.1-2:10
CUST_143377_PI430048170	4.44e-05	5.93e-07	-1.52483	mRNA	NM_001282400	RefSeq	101882287	101932066	ZMAT1	zinc finger%2C matrin-type 1%2C transcript variant 2		GTGTTGGTGGTATTTTATTGTTGTTTTTCTGTGTTTATGTGTCTCAGCTTTCTCCAAGGA	NM_001282400
CUST_88644_PI430048170	4.44e-05	5.93e-07	-3.58498	mRNA	NM_001164836	RefSeq	117836975	117877031	FXYD6	FXYD domain containing ion transport regulator 6%2C transcript variant 4		GCTGTTCTCTGTATCGTGATCTATCCTCAACAACAACAGAAAAAAGGAATAAAATATCCT	NM_001164836
CUST_66504_PI430048170	4.44e-05	5.95e-07	-3.72057	mRNA	NM_001161404	RefSeq	127638420	127681786	LIMS2	LIM and senescent cell antigen-like domains 2%2C transcript variant 5		GCAGACCTGGTGTTTGTTTGTTGGGCTCACGCTTGCACAATGAAGGCTTGTTCACACAAC	NM_001161404
CUST_125400_PI430048170	4.45e-05	5.96e-07	1.11566	mRNA	NM_001134296	RefSeq	42152945	42171183	AP3M2	adaptor-related protein complex 3%2C mu 2 subunit%2C transcript variant 1		TTGAAAACTTACAGAGTCCTGAGGCTTTCAGACTGAAAAAGGCTTTCTTCTGTCACTGAC	NM_001134296
CUST_132146_PI430048170	4.46e-05	5.98e-07	-3.35796	mRNA	NM_002073	RefSeq	23070482	23125034	GNAZ	guanine nucleotide binding protein (G protein)%2C alpha z polypeptide		GGGGATTGGATGAAAGTCAAAGGTTGTCTACTTTAAGAAAATAAAATACCCTGAATGGAG	NM_002073
CUST_144532_PI430048170	4.46e-05	5.99e-07	-1.33798	mRNA	NM_001300829	RefSeq	1269265	1273172	CIRBP	cold inducible RNA binding protein%2C transcript variant 3		AGGTTCTTGAAGATGTTTATTTATATTGTCCTTTTTTACTGGAAGACGTACGCATACTCC	NM_001300829
CUST_126805_PI430048170	4.47e-05	6.01e-07	1.45941	mRNA	NM_000946	RefSeq	56731579	56752362	PRIM1	primase%2C DNA%2C polypeptide 1 (49kDa)		CTGCCTTCAACCACAGATCAAATACTTCAAGAGCCATTTAATAAATATGGCAGAACTATA	NM_000946
CUST_134567_PI430048170	4.51e-05	6.1e-07	-3.08539	mRNA	NM_013982	RefSeq	139846778	140043299	NRG2	neuregulin 2%2C transcript variant 3		CAGAAACAGATGGGAATCCTGTCCTGAAATGTCTGAACACCTGACTGTTGACACTTGAAC	NM_013982
CUST_13646_PI430048170	4.51e-05	6.1e-07	-1.86291	ncRNA	ENST00000610937	ENSEMBL_GENCODE	144519384	144520409	ZEB2-AS1		+	AAACGTGATCGCCAAGTTTCTCTCTGGGAAAGGATCTGGGATAGATTATACCTTGAAGTC		ENST00000610937
CUST_94329_PI430048170	4.51e-05	6.1e-07	1.36018	mRNA	NM_016395	RefSeq	65530488	65578355	HACD3	3-hydroxyacyl-CoA dehydratase 3		GCCAGTTTGAGCCTAATCTGATTCTTACAGTTTTACCTTCTTGAACCAATGTAAAAGTTT	NM_016395
CUST_127642_PI430048170	4.51e-05	6.1e-07	0.866748	mRNA	NM_001256829	RefSeq	30740190	30745196	TMEM265	transmembrane protein 265		GTAACAGCAACAACCATCCTGTACATGGAGATTTGAGTGATTAAAATGGATTTTCATATC	NM_001256829
CUST_18774_PI430048170	4.51e-05	6.11e-07	-2.38451	ncRNA	NR_121614	RefSeq	71407864	71420745	LINC00472	long intergenic non-protein coding RNA 472%2C transcript variant 4		TAAGTACCTCTGGACACAATGGAAGTAGTAGTTGTTGAGCAGAGGGAAAGGGATAGGAGA	NR_121614
CUST_63695_PI430048170	2.61e-05	2.63e-07	2.18717	ncRNA	ENST00000572856	ENSEMBL_GENCODE	3603738	3608336	DLGAP1-AS2		-	GTAACTATACCAAATTACTATGTATGTGAGCTCCCAGCTTTGACATCAAGTCGTTACAGC		ENST00000572856
CUST_99141_PI430048170	4.51e-05	6.12e-07	-3.48816	ncRNA	lnc-MCF2-3:2	lncipedia	138857511	139204273			-	AAGCTGGGATCTATGAGTGGAAAGGTGACCAAGCCCAAAGAGGAGAAAGATGCTTCTAAG		lnc-MCF2-3:2
CUST_128068_PI430048170	4.52e-05	6.14e-07	-4.42538	mRNA	NM_001885	RefSeq	111908619	111913213	CRYAB	crystallin%2C alpha B%2C transcript variant 1		GCATTTTTTAAAACAAGAAAGTTTCCCCACCAGTGAATGAAAGTCTTGTGACTAGTGCTG	NM_001885
CUST_111653_PI430048170	4.56e-05	6.2e-07	0.838237	ncRNA	lnc-CDK19-1:1	lncipedia	110562174	110562615				TGAGATGAGAAGTGGTTCTACACATGAGCTGCTTCCACAACATAGCACCTATACCACCAA		lnc-CDK19-1:1
CUST_79120_PI430048170	4.57e-05	6.22e-07	1.32906	mRNA	NM_000883	RefSeq	128392276	128409982	IMPDH1	IMP (inosine 5'-monophosphate) dehydrogenase 1%2C transcript variant 1		TCAGGAGAGCTCAAGTTTGAGAAGCGGACCATGTCGGCCCAGATTGAGGGTGGTGTCCAT	NM_000883
CUST_132534_PI430048170	4.59e-05	6.25e-07	-2.25167	mRNA	NM_006682	RefSeq	77193370	77199833	FGL2	fibrinogen-like 2		GGCAACAAAACTTGTGGTCTTTACTTTTGAATAGCTACCCAAGAAAAGGTTTTAAAGGTA	NM_006682
CUST_99607_PI430048170	0.0078	0.000897	2.18217	ncRNA	lnc-PNRC2-1:4	lncipedia	24021798	24041063			-	GCAGACTGTGAGCTGCAGAGTCAAATATGATGGAAAGTTTCCTTTTGAGAGGAGAAAAAA		lnc-PNRC2-1:4
CUST_125543_PI430048170	4.6e-05	6.27e-07	0.912171	ncRNA	lnc-FAM83A-7:1	lncipedia	123445531	123447262				ATATGCTTTTTCACTGAGTAGCAATAGAAGTAGTATTTTTGCTAGGCTTGAGTTGCTTAC		lnc-FAM83A-7:1
CUST_41541_PI430048170	4.61e-05	6.29e-07	-2.28502	ncRNA	NR_121614	RefSeq	71407864	71420745	LINC00472	long intergenic non-protein coding RNA 472%2C transcript variant 4		CACTTTTCTTCCTGCAGAAGTTAGAACTCTTTTAGACAAGCTTAACACTTCAAAACTGTA	NR_121614
CUST_136055_PI430048170	4.66e-05	6.38e-07	-4.61285	mRNA	NM_001927	RefSeq	219418376	219426739	DES	desmin		CTCCCCTCCCCTGCTGCAGGGGCTCTGGAGAGAAACAATAAAGAGATTCACACACAAGCC	NM_001927
CUST_129708_PI430048170	4.66e-05	6.38e-07	-2.08751	mRNA	NM_024944	RefSeq	18244832	18267371	CHODL	chondrolectin%2C transcript variant 1		CTTGTTCTTCTCAAGAGAAAGTTGTAACTCTCTGGTCTTCATATGTCCCTGTGCTCCTTT	NM_024944
CUST_118375_PI430048170	4.66e-05	6.38e-07	-1.61571	ncRNA	lnc-LPHN2-5:1	lncipedia	81992875	81996530			+	GCTACTATATAGAACCACTCAGGAACAATAATGATAGGTATCAACGATACTGATTAGATG		lnc-LPHN2-5:1
CUST_65261_PI430048170	4.68e-05	6.42e-07	-2.46221	ncRNA	lnc-AC004696.1-1:9	lncipedia	56478182	56495432			+	TTCAGTGTGGTTTCAACCCTACTTCTGCATCTTAAAGACACTGTGTACAACGTTGGACAC		lnc-AC004696.1-1:9
CUST_130927_PI430048170	4.68e-05	6.43e-07	-3.11889	mRNA	NM_004787	RefSeq	20253563	20620561	SLIT2	slit homolog 2 (Drosophila)%2C transcript variant 1		GTGCTTTGTCTTTCTCCAGATTAATATCGGTTACACTGCTGATGTTTGTAAATTAAACAG	NM_004787
CUST_118763_PI430048170	0.0122	0.00165	2.17545	ncRNA	lnc-KIF26B-3:1	lncipedia	245707151	245709431				GATCTCTGACTTTTTGTGGCATATGAGGTGTAAAATGTTGTCAAAAAAGAATCTGGTGTT		lnc-KIF26B-3:1
CUST_100423_PI430048170	4.7e-05	6.47e-07	0.786794	mRNA	NM_001166285	RefSeq	73234235	73253022	CCT7	chaperonin containing TCP1%2C subunit 7 (eta)%2C transcript variant 4		TGATGTTGTCCATCCTGCAGCAAAGACTTTGGTAGACATTGCCAAATCCCAAGATGCTGA	NM_001166285
CUST_135473_PI430048170	4.74e-05	6.53e-07	-1.20623	mRNA	NM_021038	RefSeq	152268039	152465779	MBNL1	muscleblind-like splicing regulator 1%2C transcript variant 1		GGACAAATGTGCTTGGTTTTACTATTATGTAATCACAACTTACTTTCTGCTTGTAGTTGC	NM_021038
CUST_97642_PI430048170	0.00864	0.00103	2.17396	ncRNA	NR_121569	RefSeq	94555044	94568129	PCAT7	prostate cancer associated transcript 7 (non-protein coding)%2C transcript variant 4	-	GAGAGGAAGAAGTTACATTGTCGTATGAGGGATGCATTTTAACCATTAATTTGTGGTACA	NR_121569
CUST_27314_PI430048170	4.78e-05	6.6e-07	-2.23999	mRNA	NM_001282463	RefSeq	96039323	96093971	C14orf132	chromosome 14 open reading frame 132%2C transcript variant 1		CTGTGAAATCTCACTTTGTTAGCGTTGCTGCTGTTGTCATTTTCTATTATGATAACTGAA	NM_001282463
CUST_30331_PI430048170	0.000383	1.47e-05	2.1692	ncRNA	ENST00000580873	ENSEMBL_GENCODE	30834325	30863028	CTD-2349P21.11		+	AGGTGTCGTACAGTCTTTGTTGCTGTCAACAGGTACTGATTCAGGTGACTTTATCTTGCA		ENST00000580873
CUST_110741_PI430048170	0.00126	7.65e-05	2.16553	ncRNA	ENST00000413842	ENSEMBL_GENCODE	234882279	234888802	AC010148.1			GAAAGTGTTGAAAATTGACATCTATGTTTACATATCACAGCAACACAAAGTGCCAGCAAA		ENST00000413842
CUST_116455_PI430048170	0.000126	3e-06	2.16222	ncRNA	lnc-C12orf5-1:1	lncipedia	4278799	4285476			+	GGCATTTTTGATCAAGAGACTTAACAGACTGCTGAGAAATTTGTACCTGGTTTTTATTTG		lnc-C12orf5-1:1
CUST_125125_PI430048170	4.82e-05	6.68e-07	0.713887	ncRNA	NONHSAT122919	NONCODE	117014899	117015015			+	TCAGTTTCCTGCTTACTGCTTCATTATGGATTATACAGGAGCATGTTTTTGAACACATTA		NONHSAT122919
CUST_109789_PI430048170	4.82e-05	6.69e-07	0.960386	mRNA	NM_001278513	RefSeq	113208192	113265078	CUL4A	cullin 4A%2C transcript variant 3		GGCACAGATCCTTCCGTTTAGAGAAGACTCACTAGATAGTGTTTTATTTTTAAAGAAGAT	NM_001278513
CUST_69118_PI430048170	4.82e-05	6.7e-07	0.962145	mRNA	NM_032656	RefSeq	124946823	124989121	DHX37	DEAH (Asp-Glu-Ala-His) box polypeptide 37		TCTCAGGAAGTGGGTCAAGCCCTGGGAACCCTCATCCATGAGAGCTCGATCCCGTATGAA	NM_032656
CUST_99959_PI430048170	0.000583	2.64e-05	2.16183	ncRNA	lnc-RNASEH2B-3:39	lncipedia	50390197	50723236				GAGTCGTGCTTGTGAATTTTCATGTGTTACAACAACCAGATTAAATTTCTTCAAGTGGAA		lnc-RNASEH2B-3:39
CUST_137151_PI430048170	4.84e-05	6.75e-07	0.860901	mRNA	NM_000400	RefSeq	45351390	45370587	ERCC2	excision repair cross-complementation group 2%2C transcript variant 1		TCTTATGAAGTCAGGTGACATTTCTCACTGTCACGTCCACAGCCTTTAATCGCAGGAGAA	NM_000400
CUST_8239_PI430048170	0.000264	8.84e-06	2.16029	ncRNA	NR_125841	RefSeq	53628379	53631394	LINC01564	long intergenic non-protein coding RNA 1564		AGACGAAGCTTTTGAAGGTTTAAGGATCACCTATTTATTGACAAAATTGTTTCCGTGGCT	NR_125841
CUST_96113_PI430048170	0.00161	0.000107	2.15847	ncRNA	NR_046840	RefSeq	105561590	105570235	ARHGEF38-IT1	ARHGEF38 intronic transcript 1	+	ATTCCACTACATAGAACATGATGTACCATGATCACGACAGTTCCAGTCAGGGAGTGAAGG	NR_046840
CUST_134257_PI430048170	4.84e-05	6.77e-07	-2.92753	mRNA	NM_016170	RefSeq	74514468	74517148	TLX2	T-cell leukemia homeobox 2		TTGGGAAGACTGGAGCAAAATTAACTGTATAGGCAAAACTAAATGTTATACCTAGAGAGA	NM_016170
CUST_59737_PI430048170	4.85e-05	6.79e-07	0.682117	ncRNA	lnc-DHX37-13:1	lncipedia	125056358	125056581				GAGTTTGGCTGGCCAGGTACTTCAGTGACATTGACCTCATGGCACCTCAGCCAGGAGTGT		lnc-DHX37-13:1
CUST_137853_PI430048170	4.86e-05	6.81e-07	0.984501	mRNA	NM_138701	RefSeq	40132742	40134652	MPLKIP	M-phase specific PLK1 interacting protein		CTCTGGAAGTACCTACCACATTTTAGAGATTTACCGTTTCCATATATTTAACATTCCTGG	NM_138701
CUST_134662_PI430048170	4.86e-05	6.82e-07	-2.36091	mRNA	NM_001122646	RefSeq	96875881	96986564	FAM178B	family with sequence similarity 178%2C member B%2C transcript variant A		CCCTGTCACTAATGTGAGGTTTCTTTGTGCACATTAAAGTCTTCTTTCAGCATCAAAAAA	NM_001122646
CUST_103814_PI430048170	4.86e-05	6.83e-07	-4.90109	mRNA	NM_001040113	RefSeq	1361145	1515023	MYH11	myosin%2C heavy chain 11%2C smooth muscle%2C transcript variant SM2B		AAATCCATTCTCAAATTCCAAATATCACAGACACCCCTCACACAAGGAATATAAAAACCA	NM_001040113
CUST_138099_PI430048170	4.88e-05	6.86e-07	0.787586	mRNA	NM_032366	RefSeq	634426	636366	C16orf13	chromosome 16 open reading frame 13%2C transcript variant 1		TGGACATGCCAGCCAACAACAAATGCCTGATCTTCCGGAAAAACTAAGCCCCTCCTTCAC	NM_032366
CUST_142015_PI430048170	4.88e-05	6.87e-07	-4.6053	mRNA	NM_001458	RefSeq	128830428	128859274	FLNC	filamin C%2C gamma%2C transcript variant 1		TTTTGCACATGTCATGCAGCTCAGCTGGGAGCTGCTTAGGTGGAAAACTCCAAATAAAGT	NM_001458
CUST_134530_PI430048170	4.88e-05	6.87e-07	-1.94546	mRNA	NM_130808	RefSeq	131533559	132035442	CPNE4	copine IV%2C transcript variant 3		GCAAATACATGTCACCAAATGCACAACATTTTGGGAATGATGGTAAAATTGTATGACTGA	NM_130808
CUST_121404_PI430048170	4.92e-05	6.94e-07	-2.34253	ncRNA	ENST00000592146	ENSEMBL_GENCODE	56478183	56495441	ZNF667-AS1		+	CTTCAGTGTGGTTTCAACCCTACTTCTGCATCTTAAAGACACTTGTACAACGTTGGACAC		ENST00000592146
CUST_17228_PI430048170	4.92e-05	6.95e-07	-3.42441	ncRNA	NR_109865	RefSeq	44744327	44808793	BRCAT54	uncharacterized LOC100506674%2C transcript variant 4	+	CCTTTCAGAAACCCATGTTCAAATAAGAGATAAGATACTGAAACACATAACACCTTCACT	NR_109865
CUST_73413_PI430048170	0.00353	0.00031	2.15582	ncRNA	lnc-HCLS1-1:1	lncipedia	121521570	121533210			-	ACAGAAAACTGTACCATGGGGAGTAGCATTTCATCATGCAGATTTCTTTTTAAGAAATTG		lnc-HCLS1-1:1
CUST_131224_PI430048170	4.96e-05	7.01e-07	0.976965	mRNA	NM_006764	RefSeq	50287731	50292595	IFRD2	interferon-related developmental regulator 2		TGCTGATTTTTAAGGATTATTACAGATAATTAAACAGAACGGTCAGCCTTCTGTGGTCTT	NM_006764
CUST_133889_PI430048170	4.96e-05	7.03e-07	-4.48404	mRNA	NM_024730	RefSeq	18080868	18090193	RERGL	RERG/RAS-like%2C transcript variant 1		CCAGTTTGCCTTGCCAAATAAACTCTGTTTATGTGAATTTATTAAACGACCATGCCATAA	NM_024730
CUST_49680_PI430048170	0.000395	1.54e-05	2.14633	ncRNA	lnc-POTEM-2:5	lncipedia	19284715	19337672				GCCAAAGATGAAAGGGGAAGCAATTCCAGGCCGATGAGAAGATGCACGATTGCCATTCAG		lnc-POTEM-2:5
CUST_65155_PI430048170	4.96e-05	7.05e-07	-1.52422	ncRNA	lnc-VN1R4-2:1	lncipedia	53242210	53244011			-	TAAGATTTGCCTCTGAAAGTTGCTTTTGAAATACACATTCCGGATGGGCGTGGTGCCTCA		lnc-VN1R4-2:1
CUST_111657_PI430048170	4.96e-05	7.05e-07	-1.14678	ncRNA	lnc-TRAF3IP2-3:1	lncipedia	111392694	111405632			-	TCTTGCTGATACTTTATTTCGGTGGGAACAAGATGAAATACCAAGGTTAGTTAATGTTGT		lnc-TRAF3IP2-3:1
CUST_40458_PI430048170	4.96e-05	7.05e-07	-2.1323	ncRNA	lnc-SERPINI1-9:6	lncipedia	164617858	164687869				CAAGCAGAACAGACATAATTGCCTGAGATTTAACTTCAGAAAGCAAAACTAAGTTTCCAA		lnc-SERPINI1-9:6
CUST_25463_PI430048170	0.0105	0.00134	2.14538	ncRNA	ENST00000550324	ENSEMBL_GENCODE	93003415	93139132	RP11-511B23.2		-	CAGCACTAACATCCACATTTAATTTGTTGCTTTATTTAACACCATCATCTGCTTTCAGGG		ENST00000550324
CUST_114951_PI430048170	5.01e-05	7.14e-07	-1.48549	ncRNA	lnc-NLGN1-1:14	lncipedia	174440987	174737746				AAGAAATGAGCATTGACTATTAGGCACCTGGATGAAGACTGGGTCCAGATTGTCAGTCTC		lnc-NLGN1-1:14
CUST_52407_PI430048170	5.01e-05	7.15e-07	-1.63831	ncRNA	lnc-CEP170-12:1	lncipedia	243624665	243625056			-	TATGGTGAAATGGTTATGACTTACTTTTGGTGATGATGTGGTTGCCGTTCACCACTATAA		lnc-CEP170-12:1
CUST_33287_PI430048170	9.29e-05	1.88e-06	2.14282	ncRNA	NR_109815	RefSeq	35285250	35285772	FAM83C-AS1	FAM83C antisense RNA 1	-	CTCCTCAAAGTTCAGGATACACCAGGCGCTGTGATTCACAATAAAGTCTGCCTTTATTGA	NR_109815
CUST_68475_PI430048170	3.17e-05	3.46e-07	2.1377	ncRNA	lnc-EXD2-7:1	lncipedia	68472032	68478101			+	GGATGACTAACAAGATTTGTAATTACAGGAGGGAACATTTCCGAATAAAGTATTGTCTAC		lnc-EXD2-7:1
CUST_824_PI430048170	5.01e-05	7.18e-07	-3.47535	ncRNA	NR_109865	RefSeq	44744327	44808793	BRCAT54	uncharacterized LOC100506674%2C transcript variant 4	+	GTAGATGTAGCATCAAGCATACCAAATAAAGTAAAACTGTCATCAAGAAGATTCAACAGC	NR_109865
CUST_137298_PI430048170	5.01e-05	7.18e-07	-2.89652	mRNA	NM_003924	RefSeq	41744081	41748970	PHOX2B	paired-like homeobox 2b		GGCCACGGTTCAGACAATGGTATATATTTTTGTTATCAGGTGCATGTCTGTCTGATTTCT	NM_003924
CUST_103636_PI430048170	6.95e-06	3.15e-08	2.13653	ncRNA	lnc-PALMD-1:1	lncipedia	99698241	99699178				AGGATGTTGCTGACTACAAGTCTAGAAAGCTTGATGGTGCAAAAGGTCCTGCTAAAGTTG		lnc-PALMD-1:1
CUST_112257_PI430048170	5.05e-05	7.25e-07	1.02647	mRNA	NM_000291	RefSeq	78104168	78126827	PGK1	phosphoglycerate kinase 1		ACAAACAACCAGAGGATTAAGGCTGCTGTCCCAAGCATCAAATTCTGCTTGGACAATGGA	NM_000291
CUST_140786_PI430048170	5.05e-05	7.27e-07	0.872774	mRNA	NM_006430	RefSeq	61868126	61888671	CCT4	chaperonin containing TCP1%2C subunit 4 (delta)%2C transcript variant 1		CTTTTCCCAGTAATAATGACTGCTGTGTTGGATTCCTTCTGCAAATAAAAGTGTATACAT	NM_006430
CUST_2087_PI430048170	5.05e-05	7.27e-07	-1.35824	ncRNA	NR_046681	RefSeq	73623567	73627899	PDZRN3-AS1	PDZRN3 antisense RNA 1	-	CACTTTCTAACCAAAATGTGGCCCCAAGCCTAATAAAAATACTATTTCTATATTCACCAC	NR_046681
CUST_140810_PI430048170	5.05e-05	7.28e-07	-1.69963	mRNA	NM_001144769	RefSeq	56457986	56954628	DST	dystonin%2C transcript variant 2		GCTTGCAGAAAGCTATGAAATAAAACACGTCCCTTAACTGCATTGCTATGGAATTAATTT	NM_001144769
CUST_49540_PI430048170	0.000511	2.2e-05	2.13333	ncRNA	ENST00000424415	ENSEMBL_GENCODE	3891438	3902000	RP11-706O15.5			TCAACCAACAACTGTCGAAGAGGACGTGGCATCAAAACCAAGGTTATCAATTATTTATAA		ENST00000424415
CUST_64736_PI430048170	5.07e-05	7.32e-07	-2.1503	ncRNA	NR_040028	RefSeq	36797562	36828111	ZNF790-AS1	ZNF790 antisense RNA 1%2C transcript variant 2	-	GAACTTTAAGCACTTTTCCAAGAAGAGTGAAGGGCTGGAGAATAAATTGTGAACTAAAAT	NR_040028
CUST_3180_PI430048170	5.09e-05	7.37e-07	-3.4737	ncRNA	NR_046371	RefSeq	149162409	149222045	CP	ceruloplasmin (ferroxidase)%2C transcript variant 2	+	GCGCCATGGCAAAAGCAAATTTAGACATTTTTAAAAGGAAACAGATTCTAGGATGTACAA	NR_046371
CUST_17332_PI430048170	0.00148	9.53e-05	2.13329	ncRNA	ENST00000510261	ENSEMBL_GENCODE	65486444	65487048	CTD-2116N20.1		-	GCCCATAATCTTCATTTCTTAAACGAAGAAGGAAAAGAAAAGCTGGAGTGAAAAGTTTTG		ENST00000510261
CUST_75156_PI430048170	5.12e-05	7.42e-07	-1.55746	ncRNA	lnc-TPPP-1:4	lncipedia	653793	654586			+	CAGTTGAACGTCATTTAAAAAATGACCTTGTCTTACCAATCACAGCAAGTATGACATAAG		lnc-TPPP-1:4
CUST_27585_PI430048170	5.13e-05	7.44e-07	-2.27773	ncRNA	ENST00000551938	ENSEMBL_GENCODE	25000314	25002404	SNHG14			CCCATGACTCTAGTAAGTTTCCACAGTATTTGAGTATTCTTTATTTCCTAAAGCTGTACA		ENST00000551938
CUST_128566_PI430048170	5.14e-05	7.47e-07	1.53025	mRNA	NM_000193	RefSeq	155802863	155812273	SHH	sonic hedgehog		ACGAGTCCAAGGCACATATCCACTGCTCGGTGAAAGCAGAGAACTCGGTGGCGGCCAAAT	NM_000193
CUST_139341_PI430048170	5.15e-05	7.49e-07	-3.13782	mRNA	NM_033053	RefSeq	72872024	72875788	DMRTC1	DMRT-like family C1		CCTGCATGTGGAAACATGAAGATGTTTTCACTTTGTGTCTAGGTTTATGTACGTGAACAA	NM_033053
CUST_14868_PI430048170	5.15e-05	7.49e-07	-4.97863	ncRNA	ENST00000480831	ENSEMBL_GENCODE	64561338	64563325	ADAMTS9-AS1		-	ACACTGGAAAAGAATGTACTGTAACATGATAGAGTTACCCCATAAATGATGGACATGTTC		ENST00000480831
CUST_67509_PI430048170	0.00144	9.18e-05	2.1311	ncRNA	lnc-NBAS-15:1	lncipedia	14636584	14638230			+	ACATAGATGCTATTTAAGTGTCTAGCACACTGAATCAAGTAACTATCAGTTAGGCTGGGG		lnc-NBAS-15:1
CUST_28889_PI430048170	5.15e-05	7.5e-07	-4.93739	ncRNA	ENST00000623553	ENSEMBL_GENCODE	15745605	15747573	AF001548.4		-	GTGCTGGTTCAGGGTCACAGTGTGAAATTCCTAAAACAACCCAGGAGAGAATAGGTTTGA		ENST00000623553
CUST_56299_PI430048170	5.2e-05	7.58e-07	-2.29804	ncRNA	lnc-ANXA8-1:1	lncipedia	47460190	47462683				TTCTCATAGCTGAGCAGTCTGTTTCTCCAATCAGGTTTCAAAGCCACTTCAACTGCACTG		lnc-ANXA8-1:1
CUST_138014_PI430048170	5.2e-05	7.6e-07	-1.39402	mRNA	NM_001040272	RefSeq	18474080	18910949	ADAMTSL1	ADAMTS-like 1%2C transcript variant 4		AGACAATGAAGGCTGCTGGCTAATGTGGAAGGAGGCACTTTCTCCTCTAAAACACAAAAC	NM_001040272
CUST_75304_PI430048170	5.2e-05	7.6e-07	-2.34829	ncRNA	lnc-FAM105B-11:1	lncipedia	15775710	15777036			+	GTATATGATTGTGCTTTGTTTTCAGGAAGCTCAATATGCACACATAAGGCATTTCCAAAA		lnc-FAM105B-11:1
CUST_81049_PI430048170	0.0111	0.00144	2.13101	ncRNA	NR_121569	RefSeq	94555044	94568129	PCAT7	prostate cancer associated transcript 7 (non-protein coding)%2C transcript variant 4	-	AGAGGAAGAAGTTACATTGTCGTATGAGGGATGCATTTTAACCATTAATTTGTGGTACAG	NR_121569
CUST_86899_PI430048170	5.2e-05	7.63e-07	-1.03529	ncRNA	lnc-FAM172A-11:1	lncipedia	94340769	94340987			-	TCCCAGCACTGCGTTATGCATTTTTTGGGTGAATAATTGAATGATTTTAATTTTGCAAGC		lnc-FAM172A-11:1
CUST_135722_PI430048170	5.22e-05	7.66e-07	-4.97279	mRNA	NM_052943	RefSeq	27005019	27012842	FAM46B	family with sequence similarity 46%2C member B		GGTTTGTTGATATTTTGCACTCTTAACACCTGCCAATAAAGACGGTCTACACTGAAAAAA	NM_052943
CUST_56065_PI430048170	0.000125	2.97e-06	2.12955	ncRNA	lnc-C10orf113-2:1	lncipedia	21171546	21173838			-	AAAGGTAAGCCTTCTTTGGAAGGCTTTTGTGTAGGCATGCTGCTAGCCTAGAATAGCAAT		lnc-C10orf113-2:1
CUST_12852_PI430048170	0.0223	0.00374	2.12344	ncRNA	ENST00000422201	ENSEMBL_GENCODE	47035279	47040524	AC093732.1		+	GGGCTGTGGCAGCCAAACGTGTTTAATGAACCCAGCAAAGTGATAAACTATGTTTGTGTT		ENST00000422201
CUST_32904_PI430048170	5.22e-05	7.67e-07	-2.19755	ncRNA	NR_036522	RefSeq	56478123	56495436	ZNF667-AS1	ZNF667 antisense RNA 1 (head to head)%2C transcript variant 2	+	TGATCACCAACAACCAACTCATTCCCGGATAAGGAAGAAGAGAGTGTCACCTACTTCAGT	NR_036522
CUST_77745_PI430048170	5.22e-05	7.69e-07	-1.88772	mRNA	NM_198392	RefSeq	133889120	133895537	TCF21	transcription factor 21%2C transcript variant 1		ATCCACCTGTCTATTTGCACATGGAGGACTTTTCAAGATGTCAGGATACCCTTCCATCAC	NM_198392
CUST_135373_PI430048170	5.22e-05	7.69e-07	0.991142	mRNA	NM_024116	RefSeq	93735930	93741537	TAF1D	TATA box binding protein (TBP)-associated factor%2C RNA polymerase I%2C D%2C 41kDa		GATATATGTACCAGTCTGGTGGTGAAGAAATTCTGAAACCCAGAACTTTATAACAAGAAA	NM_024116
CUST_144860_PI430048170	5.25e-05	7.75e-07	2.26786	mRNA	NM_003104	RefSeq	45023103	45075089	SORD	sorbitol dehydrogenase%2C transcript variant 1		CAGAGGGAAGGATCCCAGGATTTTTGAAGGTTACATATTTTCTGTACCAAATATAATTTC	NM_003104
CUST_134593_PI430048170	5.29e-05	7.82e-07	1.02769	mRNA	NM_001282669	RefSeq	3857266	3885429	DFFB	DNA fragmentation factor%2C 40kDa%2C beta polypeptide (caspase-activated DNase)%2C transcript variant 1		GTTGGGCTAGATTACAGAGGGCTCATTTTCTACGTCATGTATTTTATGATACTTGAATTT	NM_001282669
CUST_143698_PI430048170	5.3e-05	7.84e-07	1.14349	mRNA	NM_017816	RefSeq	4267700	4290169	LYAR	Ly1 antibody reactive%2C transcript variant 1		TTAGAAAACCACCAGGAAAACTCAAGGAATCAGAAGCCTAAGAAGCGCAAAAAGGGACAG	NM_017816
CUST_122031_PI430048170	2.09e-05	1.8e-07	2.11975	ncRNA	NR_033917	RefSeq	4193089	4195953	LINC01433	long intergenic non-protein coding RNA 1433		GATTCTCCGTGAGCTTTTCTGAATTAAAACAAACAACATAAAATCATGGGAGTGCCTTTA	NR_033917
CUST_140833_PI430048170	5.33e-05	7.9e-07	3.13736	mRNA	NM_001190787	RefSeq	55219596	55227315	MCIDAS	multiciliate differentiation and DNA synthesis associated cell cycle protein		AGAGGCAATGGGCTATCAACAAAATAGGTGCTAAGCACATTTGTTTGTAATGATCATTCA	NM_001190787
CUST_60818_PI430048170	5.33e-05	7.91e-07	0.868269	ncRNA	lnc-GEMIN2-3:1	lncipedia	39108341	39108707			+	ATGTGGTCTTTGGCAAGTTGAAAGAAGGCATGAATATTGTGGAGGCCATGGAGTGCTTTG		lnc-GEMIN2-3:1
CUST_55036_PI430048170	5.33e-05	7.92e-07	-2.39974	mRNA	NM_002585	RefSeq	164559359	164851823	PBX1	pre-B-cell leukemia homeobox 1%2C transcript variant 1		GAAAAGTGTCGAGTTGTGCACATCCATTTCTTGTTTCACAATGTTTAAAAGTGACAGTAA	NM_002585
CUST_61767_PI430048170	3.53e-05	4.15e-07	2.11831	ncRNA	lnc-SPINT1-2:2	lncipedia	40808120	40814569			+	AGAAAAAGATGAGTTTGAGAAGCTAAGTCCACAGTGCACAGAAATACTGGGAGATGGAGG		lnc-SPINT1-2:2
CUST_80262_PI430048170	0.00431	0.000404	2.11662	ncRNA	lnc-POU5F1B-9:1	lncipedia	127292232	127292440				TTATTGCAATGGTGGTAATATGAGGAAATGATGATATCACGTTAGAAGTCCAGGAGCAAG		lnc-POU5F1B-9:1
CUST_16284_PI430048170	0.0459	0.0101	2.10972	ncRNA	ENST00000610572	ENSEMBL_GENCODE	89743792	89744305	RP11-115D19.3		-	TTTGACACCCAACTGATGTATATAAAGGAGACTGTGCATATGGGTTTTAAAATGAGATGA		ENST00000610572
CUST_133832_PI430048170	5.35e-05	7.98e-07	1.06251	mRNA	NM_178582	RefSeq	31514409	31539923	HM13	histocompatibility (minor) 13%2C transcript variant 4		TTTGTGCACATTGAGGGCATGGGCAGAATCTGCTCCCAAAAGCATTGAAAGCCAATATGA	NM_178582
CUST_88795_PI430048170	5.35e-05	7.99e-07	1.45694	mRNA	NM_198686	RefSeq	64945813	64972157	RAB15	RAB15%2C member RAS oncogene family		CAGCTGGCGAAGGAGTATGGCATGGACTTCTATGAAACAAGTGCCTGCACCAACCTCAAC	NM_198686
CUST_40251_PI430048170	5.38e-05	8.04e-07	-2.29844	ncRNA	lnc-ZNF609-4:1	lncipedia	64724365	64724702			+	AATACCAGATCTCCAACATACCAAATACCAGATCAACAACATACTAGATCTCCTAAGATC		lnc-ZNF609-4:1
CUST_142928_PI430048170	5.38e-05	8.05e-07	1.24248	mRNA	NM_178431	RefSeq	152622833	152623103	LCE3A	late cornified envelope 3A		AACTCCTGTGACAGGGGAAGTGGTCAGCAAGGCGGGAGCTCCAGCTGTGGCCACAGTTCT	NM_178431
CUST_115797_PI430048170	5.39e-05	8.07e-07	2.688	mRNA	NM_004864	RefSeq	18386157	18389176	GDF15	growth differentiation factor 15		ACCGCTGCGGCGTCAGCTCAGCCTTGCAAGACCCCAGGCGCCCGCGCTGCACCTGCGACT	NM_004864
CUST_130836_PI430048170	5.39e-05	8.08e-07	-1.91144	mRNA	NM_080597	RefSeq	24162045	24397869	OSBPL1A	oxysterol binding protein-like 1A%2C transcript variant 2		GTAGCTGCCAGTCCGTGATTTTAATTGCTGTCTTGAAGTTAACAAGTGTTATAATGAAAT	NM_080597
CUST_119595_PI430048170	0.0341	0.00666	2.10875	ncRNA	NONHSAT027604	NONCODE	32072733	32072880				TAGTACACCATACAATGGTATTTCACCTTGGACACCAGATTGCAGCAGGAGACAGGTAAC		NONHSAT027604
CUST_11909_PI430048170	5.41e-05	8.12e-07	-2.97051	ncRNA	ENST00000458139	ENSEMBL_GENCODE	201898100	201899978	RP11-307B6.3		-	GCGAACAGCTTAACCACAGTGTTGAACTCCAGAGCCTCAGTAAACCGGACCAAGATCTCA		ENST00000458139
CUST_126795_PI430048170	5.44e-05	8.18e-07	1.07291	mRNA	NM_024315	RefSeq	87196161	87219715	TMEM243	transmembrane protein 243%2C mitochondrial		CCTAGGCAACCAACTTTTGCTTATAACTACAATTTAATTTCACGTTGACAAAACACAGTG	NM_024315
CUST_34775_PI430048170	0.000185	5.34e-06	2.10359	ncRNA	NR_034031	RefSeq	3817534	3843894	LOC389906	zinc finger protein 839 pseudogene		AGTGAAGACACGTTGAGACAGGTATCTCGACCTGCCAAGTATAAAGCTAAAGCTGAGTTC	NR_034031
CUST_134831_PI430048170	5.46e-05	8.22e-07	-1.89667	mRNA	NM_182961	RefSeq	152121683	152637399	SYNE1	spectrin repeat containing%2C nuclear envelope 1%2C transcript variant 1		TGGGGCATGATGTTTTAACCTTTGCTTTAGAAGCACAAGCTGTAAATCTAAAAGGCACTT	NM_182961
CUST_137830_PI430048170	5.48e-05	8.26e-07	-2.95929	mRNA	NM_001161415	RefSeq	127645863	127652639	GPR17	G protein-coupled receptor 17%2C transcript variant 1		CTAGTGTGCAGATATTTCCCTAACATGTCCTTTTTTGTATTTGTTTGTACGGACCATAAA	NM_001161415
CUST_132072_PI430048170	5.49e-05	8.29e-07	1.5834	mRNA	NM_014698	RefSeq	225845531	225882720	TMEM63A	transmembrane protein 63A		TCATGTCACTGAGTTCCAGCCGCTTTTAGAGTAAAGTCGTTTATCATCAAAGCCAAAAAA	NM_014698
CUST_55606_PI430048170	5.49e-05	8.3e-07	1.55212	mRNA	NM_001373	RefSeq	224929653	225399294	DNAH14	dynein%2C axonemal%2C heavy chain 14%2C transcript variant 1		GTATCGGCTCATACTGCTAAACATTGCAAAGAATTTTGGGTTATTACTGCTTCATTTATC	NM_001373
CUST_62483_PI430048170	5.53e-05	8.37e-07	-3.99258	ncRNA	lnc-TTC23-4:1	lncipedia	99135312	99135588			+	ATCCAACCACGAAGTTGATTTCTCTTGTGTGCAGAGTGACTGATTTTAAAGGACATGGAG		lnc-TTC23-4:1
CUST_37528_PI430048170	0.0117	0.00155	2.10071	ncRNA	NR_121569	RefSeq	94555044	94568129	PCAT7	prostate cancer associated transcript 7 (non-protein coding)%2C transcript variant 4	-	AGTGAGAGGAAGAAGTTACATTGTCGTATGAGGGATGCATTTTAACCATTAATTTGTGGT	NR_121569
CUST_134217_PI430048170	5.57e-05	8.44e-07	4.33215	mRNA	NM_001195517	RefSeq	101131303	101137789	TLX1	T-cell leukemia homeobox 1%2C transcript variant 2		GGGGGGTGTTAATTTATGCACTTATAAGGTGTTTTCTGTGTAACCATTTTATAAAGTGCT	NM_001195517
CUST_77243_PI430048170	5.57e-05	8.44e-07	0.847422	ncRNA	lnc-DAAM2-5:1	lncipedia	39553810	39554943			-	ACACCTACAACCTGGATGAGAGTAAGGGTGTCTGTGACCTCTTTGATGTGTCTATTCTCA		lnc-DAAM2-5:1
CUST_77328_PI430048170	6.87e-05	1.19e-06	2.09385	ncRNA	lnc-GLYATL3-2:1	lncipedia	49552352	49555308			+	TTGGATGTTACCAGTGCTTGGTGATAAAACTTGATGTGGCTCTTTGCTTTGAAAAAGAAA		lnc-GLYATL3-2:1
CUST_112036_PI430048170	5.59e-05	8.5e-07	-2.2388	ncRNA	lnc-AF186192.2.1-2:3	lncipedia	144700683	144708055			+	TCCCCGTTGAAAATCATTGTAGCAGACAAATACCGGGAATGTAATAAATTGGAGAAAAGT		lnc-AF186192.2.1-2:3
CUST_97205_PI430048170	5.63e-05	8.56e-07	0.764163	ncRNA	lnc-SLC7A14-2:1	lncipedia	170653845	170654259			-	TCCAGTTTCCTGATCAAGAGGAATAAACACACCTACAGCACCGAGCCCAATAACTTGAAG		lnc-SLC7A14-2:1
CUST_123774_PI430048170	5.63e-05	8.59e-07	-0.801015	ncRNA	NONHSAT106289	NONCODE	928266	935753				TCGTTCCCCAGGCTCTGATATCAGAGCTGGAGGCTGAGGCAATGGACACTGTGTACACAC		NONHSAT106289
CUST_12269_PI430048170	5.63e-05	8.59e-07	-1.55031	ncRNA	ENST00000582218	ENSEMBL_GENCODE	247640049	247663843	RP11-634B7.4		+	TCTGTGAAGTGAGTAACCTATGGTCAGCATTTTGTTGGGTCTTGTTTTAAAAACTCACTC		ENST00000582218
CUST_94912_PI430048170	5.63e-05	8.61e-07	-2.84805	mRNA	NM_001864	RefSeq	36150921	36152869	COX7A1	cytochrome c oxidase subunit VIIa polypeptide 1 (muscle)		GACCAAGAAGCCTGGGGGGCCTGAGAGACTTGAACAAGTGTCAATAAACGCTGGCCTCTG	NM_001864
CUST_128711_PI430048170	5.63e-05	8.61e-07	-1.91959	mRNA	NM_020802	RefSeq	101915014	102001065	CEP126	KIAA1377		TACCAGAATGACTATGTCTGTGTTTCTTAGGAATGTTGAAGCTTTTTGTGAAAACTGTAC	NM_020802
CUST_121386_PI430048170	5.63e-05	8.62e-07	0.954947	ncRNA	NONHSAT067669	NONCODE	53413189	53413345			+	GTAATAAAATCAGGTACAACTTTAAAAGGAGACATTGGAGAAGAATCAAGCTGGGTCTAT		NONHSAT067669
CUST_87500_PI430048170	0.00102	5.78e-05	2.09368	ncRNA	lnc-ABHD2-7:1	lncipedia	89264341	89295851			+	CCAAGAGAACAAACTGGGAACAGAGGATGAAGGTAATTTGAGGTTGGACATATTTTAGGA		lnc-ABHD2-7:1
CUST_60914_PI430048170	5.63e-05	8.63e-07	1.73679	mRNA	NM_014584	RefSeq	52639914	52695931	ERO1L	ERO1-like (S. cerevisiae)		TCTGAGAAATTGATAGCAAATATGCCAGAAAGTGGACCTAGTTATGAATTCCATCTAACC	NM_014584
CUST_121091_PI430048170	5.64e-05	8.65e-07	-2.12694	ncRNA	lnc-PIGN-6:1	lncipedia	61808066	61809720			-	CTGGTGTCTTGTCCTTTGTATATGTGGTAATGTTGATTTTATGACTACCGTAAAAACACA		lnc-PIGN-6:1
CUST_45763_PI430048170	7.76e-05	1.44e-06	2.09356	ncRNA	NR_047498	RefSeq	47179249	47180339	LINC00853	long intergenic non-protein coding RNA 853		TATAGAGCCAATTTTACCGGCAAAGGAATGGAAGATCTGAAAGGCTAGGCGATCCCACAA	NR_047498
CUST_136692_PI430048170	5.67e-05	8.71e-07	-3.61694	mRNA	NM_017614	RefSeq	79069723	79090074	BHMT2	betaine--homocysteine S-methyltransferase 2%2C transcript variant 1		CCCTTACTTAGCATTGTGTTAGACATACTAATAGGTGCACAGTGAAATACTTATTGTTGA	NM_017614
CUST_139485_PI430048170	5.7e-05	8.78e-07	-1.91657	mRNA	NM_001503	RefSeq	24425833	24489622	GPLD1	glycosylphosphatidylinositol specific phospholipase D1		CCTCTGTAGGTATTACTAAAGTCATGAGAGTTAAATCCAACGTGCAACTTTAATATTGCA	NM_001503
CUST_108539_PI430048170	5.7e-05	8.78e-07	0.580283	mRNA	NM_006590	RefSeq	85616091	85649284	USP39	ubiquitin specific peptidase 39%2C transcript variant 1		TAAAAAGCTTCCCCATCCTGATCTGCCAGCAGAAGAAAAAGAGCAGTTGCTCCATAATGA	NM_006590
CUST_132344_PI430048170	5.72e-05	8.81e-07	-2.92716	mRNA	NM_001143773	RefSeq	59246128	59362903	FAM13C	family with sequence similarity 13%2C member C%2C transcript variant 3		CATCTTTGATAAGGGAAATGGTTTCGTGACATGTACACAGTTGCTATTAAAATGTAACTC	NM_001143773
CUST_138986_PI430048170	5.72e-05	8.82e-07	-3.15843	mRNA	NM_006942	RefSeq	7588179	7590170	SOX15	SRY (sex determining region Y)-box 15		GCCAGGGAGAGCCGCACAACATACAATTATATTTTTGGTAGTATTAAACAGTTTTGTATT	NM_006942
CUST_370_PI430048170	5.79e-05	8.95e-07	-3.88641	mRNA	NM_004469	RefSeq	15345590	15384413	FIGF	c-fos induced growth factor (vascular endothelial growth factor D)		GGGACCCATGTAATCCTTTTGTTTAGTTTTGTTTTTGTTTTTTGGTGAATGAGAAAGGTG	NM_004469
CUST_118479_PI430048170	5.85e-05	9.05e-07	-1.2434	ncRNA	ENST00000566949	ENSEMBL_GENCODE	119909255	119910613	RP5-1042I8.7			TCTGATCTAGTAGTGTGTTTCTTCACCACTTTGGCTTTGAGCACTCAAAGTGCAGACAGT		ENST00000566949
CUST_752_PI430048170	5.85e-05	9.06e-07	-1.31235	ncRNA	NR_109875	RefSeq	115602154	115620419	LOC101927100	uncharacterized LOC101927100%2C transcript variant 2	-	AGATTGGAACACTGCTCAGCCTTCCCAACCTTCTTTTACCACTGATGTTTCTACCTTAGT	NR_109875
CUST_107203_PI430048170	5.86e-05	9.09e-07	-2.09454	ncRNA	lnc-CREBZF-4:1	lncipedia	84997225	84997768				GTCTGCAAGAGTGGCTTTGCAAGCCAGATGTAAAAAGAAAAATACAGGTAACTTGTTTTG		lnc-CREBZF-4:1
CUST_27316_PI430048170	5.86e-05	9.09e-07	-2.17689	mRNA	NM_001282463	RefSeq	96039323	96093971	C14orf132	chromosome 14 open reading frame 132%2C transcript variant 1		GTATCTGTGAAATCTCACTTTGTTAGCGTTGCTGCTGTTGTCATTTTCTATTATGATAAC	NM_001282463
CUST_131032_PI430048170	5.87e-05	9.11e-07	-3.18327	mRNA	NM_001332	RefSeq	10971840	11904043	CTNND2	catenin (cadherin-associated protein)%2C delta 2%2C transcript variant 1		CTGAGGCCAATAGGTGCCTAGTAAATGTTAACTGTTCTTGGAAAAAATAAAAACATCAGT	NM_001332
CUST_95578_PI430048170	5.88e-05	9.13e-07	-1.53737	ncRNA	lnc-CSTB-3:1	lncipedia	43855889	43856342				AGAGGATTATGTGGAAAGACTTCAGGTGTTTGACAAGGAAGAGAATGGCACCGTCATGAG		lnc-CSTB-3:1
CUST_55161_PI430048170	0.00624	0.000664	2.09348	ncRNA	lnc-RASAL2-3:1	lncipedia	178006431	178034803			-	GATCACGGCAGATCAAAATATCACCAAAGTTAACTCCACAGAAATGGACATCAACTCTGA		lnc-RASAL2-3:1
CUST_58617_PI430048170	5.89e-05	9.17e-07	0.774887	mRNA	NM_018172	RefSeq	71787510	71801234	FAM86C1	family with sequence similarity 86%2C member C1%2C transcript variant 1		TAAGAGACTCATCAGATTCTGAGCTGCTGCGGGATATTTTGCAGAAGACGTGCTGTATTG	NM_018172
CUST_137743_PI430048170	5.89e-05	9.18e-07	-2.42259	mRNA	NM_001010935	RefSeq	111619782	111716695	RAP1A	RAP1A%2C member of RAS oncogene family%2C transcript variant 1		CAAGAGATTGGCTGTTCCTCTTGAGGAAAAACCTTAATAAACCTTCCCATTTTAAACAGT	NM_001010935
CUST_128139_PI430048170	5.89e-05	9.18e-07	0.811184	mRNA	NM_001436	RefSeq	39834452	39846414	FBL	fibrillarin		TGTGTTGATACTGTTGCACGTGTGTTTTTCTATTAAAAGACTCATCCGTCTCCCAAAAAA	NM_001436
CUST_113313_PI430048170	0.0155	0.00227	2.0925	ncRNA	lnc-PLEKHA6-1:1	lncipedia	204367803	204378303				ATCTTCTTCATCAATGATGAGGAAAAGTCAACCAGCTGGGTGCACCCTGGAACAAAGTCA		lnc-PLEKHA6-1:1
CUST_88678_PI430048170	5.9e-05	9.21e-07	-3.44381	ncRNA	lnc-LMO3-1:8	lncipedia	16597615	16607122			+	ATGGGTGAAATTAGCTAAAGGAAAAAGGAAGGTACACCTAAAGTTGCCACTATCTAATTG		lnc-LMO3-1:8
CUST_125456_PI430048170	0.00258	0.000204	2.09133	ncRNA	ENST00000528800	ENSEMBL_GENCODE	69834129	69837829	RP11-159H10.3		-	CCTCTTCAAACTTTCAGACTTACGTTTGCTTCTTCTAAGTCCATCGACTTTATACATAAA		ENST00000528800
CUST_17992_PI430048170	5.93e-05	9.29e-07	-3.77116	ncRNA	ENST00000602964	ENSEMBL_GENCODE	149406879	149428678	MIR143HG		+	TAAAAAGAAATGGAACCCAAGAAGGGAAATCCAACTAGGAGCCAAGAATCCGGTCTACCC		ENST00000602964
CUST_128039_PI430048170	5.98e-05	9.37e-07	-3.02502	mRNA	NM_000044	RefSeq	67544031	67730619	AR	androgen receptor%2C transcript variant 1		GAGTTATTGTTAACAAAGAGACCCAAGAAAAGCTGCTAATGTCCTCTTATCATTGTTGTT	NM_000044
CUST_103497_PI430048170	5.98e-05	9.38e-07	0.974561	mRNA	NM_003685	RefSeq	6413107	6424811	KHSRP	KH-type splicing regulatory protein		ACCCCCACAGCAGGACTACACGAAGGCTTGGGAGGAGTACTACAAGAAGCAAGCGCAAGT	NM_003685
CUST_10434_PI430048170	5.98e-05	9.39e-07	-1.97583	ncRNA	NR_033712	RefSeq	3735983	3746771	TP73-AS1	TP73 antisense RNA 1%2C transcript variant 5	+	CTTTGGAGATTTAGGTTGAGTCATGAGAACCGGTCATTGGAACATACACTTTATTATGTT	NR_033712
CUST_94274_PI430048170	5.99e-05	9.41e-07	1.74609	mRNA	NM_032361	RefSeq	175959530	175968315	THOC3	THO complex 3		TGGGAAAATGCTGGCGTCAGCATCGGAAGATCATTTTATTGACATTGCTGAAGTGGAGAC	NM_032361
CUST_114327_PI430048170	6.03e-05	9.48e-07	-1.64882	mRNA	NM_001144769	RefSeq	56457986	56954628	DST	dystonin%2C transcript variant 2		TTTGTATCAGAGCAATTTTGCTTGCAGAAAGCTATGAAATAAAACACGTCCCTTAACTGC	NM_001144769
CUST_64217_PI430048170	6.04e-05	9.53e-07	1.74591	mRNA	NM_032737	RefSeq	2428164	2456968	LMNB2	lamin B2		TTTTATCTGTGATTTTCTCGCTGAAACCATGTTTCTCAGACAGGCCAAGGCCACCTGACT	NM_032737
CUST_67913_PI430048170	2.01e-05	1.68e-07	2.08964	ncRNA	lnc-FAM176A-1:1	lncipedia	75558482	75561323			-	AGTCTCCTTTTGGGTGAAGCATCATTCTTCAGTTCCTACAGACCATTTTGTTGCTCCCTG		lnc-FAM176A-1:1
CUST_100509_PI430048170	1.03e-05	6.18e-08	2.08953	ncRNA	lnc-SRPK2-9:1	lncipedia	105470285	105472188			-	TGCCTTAGTAAAAGGGTTGAACAGTAAGCAGTCTATAGTTGCATTTTAGTCTGGTTTCAT		lnc-SRPK2-9:1
CUST_138811_PI430048170	6.04e-05	9.55e-07	-3.27299	mRNA	NM_016577	RefSeq	133824235	133895847	RAB6B	RAB6B%2C member RAS oncogene family		GTGTAAAATGTGGAAAAGACTCAGCATGTTGGTCAAACAATAAACTGTCCTAATTCTCAA	NM_016577
CUST_132329_PI430048170	6.08e-05	9.61e-07	-1.46399	mRNA	NM_152484	RefSeq	37411157	37467437	ZNF569	zinc finger protein 569		CCTTTTGGGATGTGGGAAAGGTTTGGTGGGAGTTGTTATATTTATCTGTAATATTTCTTT	NM_152484
CUST_54502_PI430048170	6.1e-05	9.65e-07	-2.41182	mRNA	NM_001010935	RefSeq	111619782	111716695	RAP1A	RAP1A%2C member of RAS oncogene family%2C transcript variant 1		CAAGAAGCAAGAGATTGGCTGTTCCTCTTGAGGAAAAACCTTAATAAACCTTCCCATTTT	NM_001010935
CUST_119536_PI430048170	6.1e-05	9.67e-07	1.33422	mRNA	NM_002156	RefSeq	197486583	197499916	HSPD1	heat shock 60kDa protein 1 (chaperonin)%2C transcript variant 1		CATTTTTACTACTATTCTGTTAAAATCAGGATTTAGTGCTTGCCACCACCAGATGAGAAG	NM_002156
CUST_99580_PI430048170	6.11e-05	9.7e-07	-3.6145	ncRNA	lnc-PLEKHA2-5:2	lncipedia	38728616	38745352				AAGGAATCCAGAAAAGCAAGAGTCAAAGAAGGCATCTGCAGGCCAAATCTCTGATCAACC		lnc-PLEKHA2-5:2
CUST_103471_PI430048170	6.11e-05	9.7e-07	-2.75638	mRNA	NM_138736	RefSeq	56191338	56348199	GNAO1	guanine nucleotide binding protein (G protein)%2C alpha activating activity polypeptide O%2C transcript variant 2		GTGAAATTACTCCTGCTCGGGGCTGGAGAATCAGGAAAAAGCACCATTGTGAAGCAGATG	NM_138736
CUST_137140_PI430048170	6.11e-05	9.72e-07	-0.787115	mRNA	NM_005775	RefSeq	22551737	22575495	SORBS3	sorbin and SH3 domain containing 3%2C transcript variant 1		CCCAGCCCCACATCCCCTCTGGAAGAGAATGTAAAATAAACCTGGACACAAGGGAAAAAA	NM_005775
CUST_74538_PI430048170	6.11e-05	9.73e-07	0.952239	ncRNA	lnc-GK2-1:2	lncipedia	79587301	79588091				ATGCAATCGCATAGCAGAGTCATCTCTTATGCGGGCTGCCTGACATAGATGTCTTTCTTT		lnc-GK2-1:2
CUST_51743_PI430048170	6.11e-05	9.73e-07	0.860892	mRNA	NM_006360	RefSeq	32583766	32602873	EIF3M	eukaryotic translation initiation factor 3%2C subunit M		GGTATCCCTACTCTTGATCCTGGAACCAGACAAGCAAGAAGCTTTGATTGAAAGCCTATG	NM_006360
CUST_130428_PI430048170	6.11e-05	9.74e-07	-2.70341	mRNA	NM_004114	RefSeq	138631572	138711665	FGF13	fibroblast growth factor 13%2C transcript variant 1		GACATAGCATGTACAGGCAGTTTTCTGTCCTGTGCACAAAAAGTTTAAAAAAGTTGTTTA	NM_004114
CUST_88651_PI430048170	0.00989	0.00123	2.08621	ncRNA	lnc-CLMP-3:1	lncipedia	123059981	123062136			-	TTGCTTACGGCTTAGACAAAAAGGTATGTACCATTTGTGATGCAAGTTCGGATTATTTTA		lnc-CLMP-3:1
CUST_112007_PI430048170	2.64e-05	2.66e-07	2.08604	ncRNA	lnc-COL14A1-3:1	lncipedia	120459275	120473950			+	CTGAGTGGCAATATAGTCAATTTCGCTTATTCTACATATAGTCATGGGATAATACTGATC		lnc-COL14A1-3:1
CUST_36808_PI430048170	0.00728	0.00082	2.08534	ncRNA	ENST00000580734	ENSEMBL_GENCODE	182959485	182959575	AL450304.1		-	ATTAAGGAGAGGACCACAGTGGTCACCATGCAGTCCACTGAGGTTGGAGTTGCTGAGATG		ENST00000580734
CUST_132841_PI430048170	6.17e-05	9.87e-07	-3.36944	mRNA	NM_006210	RefSeq	56810076	56840726	PEG3	paternally expressed 3%2C transcript variant 1		GTCTGTGATTATTAGGGTGTTAGTGATAAGTATGCATAAATGTCAAAGATGGGAAGAAAG	NM_006210
CUST_120597_PI430048170	6.17e-05	9.88e-07	-1.92482	mRNA	NM_001007156	RefSeq	87977364	88256731	NTRK3	neurotrophic tyrosine kinase%2C receptor%2C type 3%2C transcript variant 3		TCTTAACCATGGCATCTATGTTGAGGATGTCAATGTTTATTTCAGCAAAGGACGTCATGG	NM_001007156
CUST_130644_PI430048170	6.17e-05	9.89e-07	1.132	mRNA	NM_016183	RefSeq	19251580	19260128	MRTO4	mRNA turnover 4 homolog (S. cerevisiae)		TGTTCTATTTGTATTTCATGAAAGCAGTTCTGAATGAGAGTAAATCAGCTTCAGGGTGTA	NM_016183
CUST_83936_PI430048170	0.00193	0.000137	2.08496	ncRNA	NR_110164	RefSeq	161244738	161249050	LOC100996579	uncharacterized LOC100996579%2C transcript variant 2		CTTTGCATTTATTGGTACATAGTTAATGCTTATACACAGGCTTCAGTGTAACACCTATAC	NR_110164
CUST_79139_PI430048170	0.000688	3.34e-05	2.08201	ncRNA	lnc-TNPO3-6:2	lncipedia	128869229	128871340			-	AAACCTCCGGAGAAGGACTACCACGCTGACGCAGAGCATGATCAAAGGCGAGCCACAAAG		lnc-TNPO3-6:2
CUST_139666_PI430048170	6.21e-05	9.98e-07	0.590418	mRNA	NM_001008391	RefSeq	32602079	32794658	CCDC73	coiled-coil domain containing 73		GTTGCCACTGCTGTTTTCCAAATGTCCGATGTGTGCTATGACTAAAAATTGAAAAATTAA	NM_001008391
CUST_105015_PI430048170	6.21e-05	9.98e-07	0.937229	ncRNA	lnc-PKP3-2:2	lncipedia	450353	461051			+	GATTCTGACGCCAGTCTCAGAAGTGCGTGTGGAAGAGAAGCTGGTTTTAGAGCCTGTGAA		lnc-PKP3-2:2
CUST_93699_PI430048170	6.21e-05	1e-06	-3.19902	ncRNA	ENST00000515741	ENSEMBL_GENCODE	173530462	173537295	HAND2-AS1		+	TAAAAGGGATTAGGACCTTGGCTCAAAATGTGGTCAACGCAGTGTTCAAATTAGGAGGGC		ENST00000515741
CUST_139024_PI430048170	6.21e-05	1e-06	3.26817	mRNA	NM_001270601	RefSeq	201113952	201115372	ASCL5	achaete-scute family bHLH transcription factor 5		TATAGGTACATAGGCACTGCGTCGGCACCAAAGAGCTAAATAAAAGGATTGTTGAATTTT	NM_001270601
CUST_141505_PI430048170	6.22e-05	1e-06	-3.49441	mRNA	NM_004080	RefSeq	14145048	14841450	DGKB	diacylglycerol kinase%2C beta 90kDa%2C transcript variant 1		CCTGTAAAAGAGCTTTTATTTTGTGAGAGGCAGAAATCACCACTTAAAACTCCCAATTAA	NM_004080
CUST_55826_PI430048170	6.23e-05	1.01e-06	-0.896931	mRNA	NM_152609	RefSeq	246566336	246668582	CNST	consortin%2C connexin sorting protein%2C transcript variant 1		TTGTGGGCTTGATTTAGATCCTATTGCGGGGTCATTACGCAAAAATTCAATCATACCTTC	NM_152609
CUST_34777_PI430048170	0.000287	9.88e-06	2.07728	ncRNA	ENST00000456563	ENSEMBL_GENCODE	3854349	3867135	RP11-706O15.3			CATGTGTCATTTCAACCAACAACTGTTGAAGAGGACGTGGCATCAAAACCAAGGTTATCA		ENST00000456563
CUST_125251_PI430048170	6.23e-05	1.01e-06	0.893663	ncRNA	lnc-RARRES2-2:2	lncipedia	150372548	150373296			+	TTTCCACTGGTGGCTCCTCTAGCCAGAGGGCTCTAAGGGGCGGATGCTATTGCTGCTTTT		lnc-RARRES2-2:2
CUST_50510_PI430048170	6.23e-05	1.01e-06	0.982257	ncRNA	ENST00000522673	ENSEMBL_GENCODE	45378560	45391722	TPT1-AS1		-	TTGAATCTTCTCTCATCACGTGGCAGCATCTTTTTAAAGGTGTGATGATCTGAAGAATCA		ENST00000522673
CUST_135595_PI430048170	6.23e-05	1.01e-06	2.84643	mRNA	NM_000059	RefSeq	32315479	32399672	BRCA2	breast cancer 2%2C early onset		CAACAAAATGGTCATCCAAACTCAAACTTGAGAAAATATCTTGCTTTCAAATTGGCACTG	NM_000059
CUST_8105_PI430048170	6.23e-05	1.01e-06	-1.82341	ncRNA	NR_108080	RefSeq	2328748	2377992	CD81-AS1	CD81 antisense RNA 1	-	CAGCTGCCATTGAGTTGATGGAGAGGAATGAGAGCAAATACATCCTGAAACTTCAAAAAA	NR_108080
CUST_130734_PI430048170	6.23e-05	1.01e-06	-3.06856	mRNA	NM_024686	RefSeq	83869373	83999150	TTLL7	tubulin tyrosine ligase-like family member 7		GGTTTATCATTACTATAGCACACTGTAAAGTGCTAGAAAAGTCATAACCTGATTCTCCAA	NM_024686
CUST_70887_PI430048170	6.23e-05	1.02e-06	-2.41907	mRNA	NM_001009984	RefSeq	3249301	3407662	C20orf194	chromosome 20 open reading frame 194		GTGAATTTACCTTGGTAATCGAGATGTCATGCTAAGGACCAATAAACTATCACTGAACAA	NM_001009984
CUST_127306_PI430048170	6.23e-05	1.02e-06	-2.23645	mRNA	NM_020871	RefSeq	115110619	115234072	LRCH2	leucine-rich repeats and calponin homology (CH) domain containing 2%2C transcript variant 1		ATGGTCCCCTACAATGTTATACCAAGGCTCTGATGTATTTCTTTTAGTAGTTTCTAAGTG	NM_020871
CUST_28526_PI430048170	0.0206	0.00337	2.07685	ncRNA	ENST00000560314	ENSEMBL_GENCODE	97295881	97415824	CTD-2147F2.1			TACAAAAGAGTTAAAGAAGCTATTTATTTTAATGTTTCCTTGGAGAGCACACTTGTTATT		ENST00000560314
CUST_127372_PI430048170	6.23e-05	1.02e-06	-2.5302	mRNA	NM_001099401	RefSeq	94585223	94656209	SGCE	sarcoglycan%2C epsilon%2C transcript variant 1		GCATGAGCTTTTCTGGCATATGTTATGCATGTTGGCAGTATTAAGTGTATACCAAATAAT	NM_001099401
CUST_134083_PI430048170	6.23e-05	1.02e-06	-2.41437	mRNA	NM_001009984	RefSeq	3249301	3407662	C20orf194	chromosome 20 open reading frame 194		ACCTTGGTAATCGAGATGTCATGCTAAGGACCAATAAACTATCACTGAACAAGCAAAAAA	NM_001009984
CUST_65537_PI430048170	6.23e-05	1.02e-06	1.35686	mRNA	NM_001199803	RefSeq	24793305	24822376	CENPO	centromere protein O%2C transcript variant 2		TCTGTTCTCATGACTAAGGGGACAGGAGTTCCAGAAGAACCTTTCAAGATGATCAGGAAC	NM_001199803
CUST_94467_PI430048170	6.23e-05	1.02e-06	1.50604	mRNA	NM_032361	RefSeq	175959530	175968315	THOC3	THO complex 3		TTTATTGACATTGCTGAAGTGGAGACAGGGGACAAACTATGGGAGGTACAGTGTGAGTCT	NM_032361
CUST_5120_PI430048170	0.00233	0.000178	2.07607	ncRNA	NR_024242	RefSeq	47923778	47923899	SNAR-A14	small ILF3/NF90-associated RNA A14		GTTCCAGGGCACGAGTTCGAGGCCAGCCTGGTCCACATGGGTCGGAAAAAAGGATTTTTT	NR_024242
CUST_127487_PI430048170	6.25e-05	1.02e-06	1.31295	mRNA	NM_001258310	RefSeq	6556869	6568332	NOP2	NOP2 nucleolar protein%2C transcript variant 5		GAGGATGCCTTCTCTACTGTGCATACCCATGAAATTTAATACACATTTTAAAACCTCTGG	NM_001258310
CUST_110999_PI430048170	0.000675	3.24e-05	2.07436	ncRNA	lnc-ITPR1-1:1	lncipedia	4980231	4981610			+	TTTGAGTGCAAATAGAGAGCCCGTGGGCTCAACATCTGATGTAATAAACATTACTGCAAC		lnc-ITPR1-1:1
CUST_55798_PI430048170	6.26e-05	1.03e-06	-2.15609	mRNA	NM_005465	RefSeq	511826	855380	AKT3	v-akt murine thymoma viral oncogene homolog 3%2C transcript variant 1		ATAAAGAGAAACCTCAAGATGTGGATTTACCTTATCCCCTCAACAACTTTTCAGTGGCAA	NM_005465
CUST_20062_PI430048170	6.27e-05	1.03e-06	-1.85271	ncRNA	ENST00000607968	ENSEMBL_GENCODE	105102838	105105483	CTB-152G17.6		+	ATGGTTTAGCAGCATGCCTACAAACTGTACTGAATTAGGTAAGAACAAAGACAGAATAAA		ENST00000607968
CUST_130059_PI430048170	6.27e-05	1.03e-06	1.44868	mRNA	NM_033445	RefSeq	228457363	228457859	HIST3H2A	histone cluster 3%2C H2a		TTGTCTTTTTTCCTTGACTCGGAAATGTCCGGTCGTGGTAAGCAGGGTGGCAAGGCGCGC	NM_033445
CUST_137294_PI430048170	6.27e-05	1.03e-06	-1.23592	mRNA	NM_003098	RefSeq	33407956	33443892	SNTA1	syntrophin%2C alpha 1		TTTTCTCTTCATCCTGTCTCTCTCCTCCTTACTCTTGGATAAATAAACAGCCTGTGAGCA	NM_003098
CUST_136524_PI430048170	6.28e-05	1.03e-06	-5.842	mRNA	NM_001101387	RefSeq	10822474	10838101	PIRT	phosphoinositide-interacting regulator of transient receptor potential channels		GTTTGGGAGAATTTGATCTAACCCGAAGCCTAAAGGAATCAATGTAATGTTGAATTGTAT	NM_001101387
CUST_144824_PI430048170	6.3e-05	1.04e-06	0.753811	mRNA	NM_013388	RefSeq	27130755	27134674	PREB	prolactin regulatory element binding		AGCCCATTAGGCAGGAAAAGTTGATATTTAATAAACAAGGAAAGAGTGAACTGAGACCCC	NM_013388
CUST_133980_PI430048170	6.3e-05	1.04e-06	-3.09827	mRNA	NM_001204268	RefSeq	117820074	117877031	FXYD6-FXYD2	FXYD6-FXYD2 readthrough%2C transcript variant 1		AAAGGAGAAGGAAATGGACCCTTTTCATTATGATTACCAGACCCTGAGGATTGGGGGACT	NM_001204268
CUST_138435_PI430048170	6.3e-05	1.04e-06	0.668224	mRNA	NM_198897	RefSeq	65883739	65888539	FIBP	fibroblast growth factor (acidic) intracellular binding protein%2C transcript variant 1		ATGGATGACATGGACATGGACTTAGACAAGGAATTTCTCCAGGACTTGAAGGAGCTCAAG	NM_198897
CUST_129090_PI430048170	6.31e-05	1.04e-06	-2.84483	mRNA	NM_002009	RefSeq	49423177	49487326	FGF7	fibroblast growth factor 7		TTGGCAATGCACTTCATACACAATGACTAATCTATACTGTGATGATTTGACTCAAAAGGA	NM_002009
CUST_102585_PI430048170	5.44e-05	8.19e-07	2.07162	ncRNA	lnc-GTPBP10-3:6	lncipedia	90403535	90409184			+	GGAATCAGTGTTACAGGGCAGTTTGATTGGAGAAATCTCAATTACATTGAAATTCCAATT		lnc-GTPBP10-3:6
CUST_135683_PI430048170	6.32e-05	1.05e-06	1.05287	mRNA	NM_138578	RefSeq	31664457	31722853	BCL2L1	BCL2-like 1%2C transcript variant 1		TAGTCTGTGTGAAGGTGAAAGTGCAGTTCAGTAATAAACTGTGTTTACTCAGTGAAAAAA	NM_138578
CUST_123142_PI430048170	6.32e-05	1.05e-06	-2.20278	ncRNA	NONHSAT098097	NONCODE	119627149	119627295			-	AACTTCCCACGTTTGCTATGTTGCCCTTTGGAGACAAAACAAGAGAAATGGTCAATGCAT		NONHSAT098097
CUST_74640_PI430048170	6.34e-05	1.05e-06	-3.31047	mRNA	NM_000669	RefSeq	99336491	99353045	ADH1C	alcohol dehydrogenase 1C (class I)%2C gamma polypeptide		TTTGTAAAAACCCAGAAAGCAACTACTGCTTGAAAAATGATCTAGGCAATCCTCGGGGGA	NM_000669
CUST_93134_PI430048170	6.34e-05	1.05e-06	-3.58227	mRNA	NM_198560	RefSeq	9498360	9553802	LHFPL4	lipoma HMGIC fusion partner-like 4		CTGGGTTTAAGCTTCAGTGCAGGTGGAATGACATTCAAATAAAGAAACACTTTCTATCAC	NM_198560
CUST_12820_PI430048170	0.0333	0.00645	2.06925	ncRNA	ENST00000560399	ENSEMBL_GENCODE	44921077	44923039	RP11-89K21.1			GTACAGGTCTTTGGCCACACAGAGATTCAACAGTCTAATAATCTAAAATTGTAAATGCCA		ENST00000560399
CUST_92407_PI430048170	6.37e-05	1.06e-06	1.30963	mRNA	NM_177439	RefSeq	48476020	48486364	FTSJ1	FtsJ RNA methyltransferase homolog 1 (E. coli)%2C transcript variant 3		TGGTCCCACCCGCATCATTGTGCCTTTTGTGACCTGTGGGGACCTGAGCTCCTATGATTC	NM_177439
CUST_144424_PI430048170	6.37e-05	1.06e-06	-3.18204	mRNA	NM_032588	RefSeq	26051304	26067634	TRIM63	tripartite motif containing 63%2C E3 ubiquitin protein ligase		CGGGGTGGTAACTGAGTTTGTGTTATATGTTGTTTTAATAAATGCACAATGCTCTCTTCC	NM_032588
CUST_93174_PI430048170	6.39e-05	1.07e-06	-4.6027	mRNA	NM_018640	RefSeq	16548371	16606602	LMO3	LIM domain only 3 (rhombotin-like 2)%2C transcript variant 1		AAAGATCAAGGACCGGTATCTTCTAAAGGCACTGGACAAATACTGGCATGAAGACTGCCT	NM_018640
CUST_133553_PI430048170	6.39e-05	1.07e-06	2.14245	mRNA	NM_032521	RefSeq	50731543	50753741	PARD6B	par-6 family cell polarity regulator beta		GTAGGCTGAATCAATTATTTCAAGTGCACCTTATTAACAAAAGTATCAGTGGATCCAACA	NM_032521
CUST_34124_PI430048170	0.00132	8.22e-05	2.0643	ncRNA	ENST00000623199	ENSEMBL_GENCODE	15298378	15304556	LA16c-60D12.2			TACAAAGGCAGCTTAGAAATGATTATATCTGTCCAGGGGTTGATACTGGTGGTGTTAGAA		ENST00000623199
CUST_24438_PI430048170	6.4e-05	1.07e-06	-2.10936	ncRNA	ENST00000581173	ENSEMBL_GENCODE	117833910	117838942	RP11-728F11.4		-	GGCACTTCATCATCCAGAAACCTCTTTTACCTTACAATGTGAGATAAACTTATATACCTT		ENST00000581173
CUST_135001_PI430048170	6.4e-05	1.07e-06	-0.943252	mRNA	NM_001286035	RefSeq	150809704	150876768	ARNT	aryl hydrocarbon receptor nuclear translocator%2C transcript variant 5		AGATGCTCTGGGGGTTTTGTTTTTGCTTTTCCTTCAGGGTTTTATTTTTGACTGTTTTGT	NM_001286035
CUST_54734_PI430048170	6.4e-05	1.07e-06	0.636093	ncRNA	ENST00000617702	ENSEMBL_GENCODE	120913328	121001622	LINC00869		+	CTCACAGCTGATCCAGTCCATTCAGCAGTCCGTTGAAAGGCTCCTAGTCTAAACCTGTGG		ENST00000617702
CUST_112211_PI430048170	0.000204	6.27e-06	2.06344	ncRNA	NR_034031	RefSeq	3817534	3843894	LOC389906	zinc finger protein 839 pseudogene		CACGTGTCATTTCAACCAACAACTGTTGAAGAGGACGTGGCATTAAAACCAAGGGTATCA	NR_034031
CUST_46766_PI430048170	0.0137	0.00192	2.06079	ncRNA	lnc-GOLGA7-1:1	lncipedia	41511239	41512521			+	TCCAGTGCTTGGAGATTGACCTGGACTCAATGAGAAATCTGAAGACCAGCTTGTAGAACA		lnc-GOLGA7-1:1
CUST_111375_PI430048170	6.47e-05	1.09e-06	0.73278	ncRNA	lnc-FST-4:1	lncipedia	53413503	53414260				AGAACATGAACAGCAGGAGTTCATTAGAGCTCTGGCAGCCATTCTCAAAAAGTCCAGGAA		lnc-FST-4:1
CUST_136458_PI430048170	6.49e-05	1.09e-06	1.20339	mRNA	NM_005620	RefSeq	152032505	152037035	S100A11	S100 calcium binding protein A11		CTCATGCAGGCCCCACCTGCCAATAGTAATAAAGCAATGTCACTTTTTTAAAACATGAAA	NM_005620
CUST_75522_PI430048170	0.00252	0.000198	2.06019	ncRNA	lnc-TRIM23-2:4	lncipedia	65561115	65563123			-	TAGCAGGTGAGATTTTCAGCCTTCTACTAGTTGACATTCAAATTGTTAATAGCTAACACT		lnc-TRIM23-2:4
CUST_31390_PI430048170	0.0441	0.00955	2.05563	ncRNA	NR_110763	RefSeq	12739485	12749422	LOC100996324	uncharacterized LOC100996324		TTCTCCTAAAAATGGAATGCAGGCCATCTATTCTAGGGAAATAAAGGATTCTAGTTATGT	NR_110763
CUST_131528_PI430048170	6.49e-05	1.09e-06	-2.62827	mRNA	NM_001282356	RefSeq	91209493	91398154	SLC26A7	solute carrier family 26 (anion exchanger)%2C member 7%2C transcript variant 3		TTTGTGGCCAGATTTCAAATAGGGAGTTAAGTGGTACTTTCACAATCCAAAGATTTTTAG	NM_001282356
CUST_16290_PI430048170	0.0236	0.00404	2.05474	ncRNA	ENST00000502368	ENSEMBL_GENCODE	91319034	91325306	RP11-763F8.1		+	CATCTGTTAATTTCCTTACCAAGTTCTGGAGATTAAAAATGGACACTGGAGGAACCTAAA		ENST00000502368
CUST_99674_PI430048170	6.49e-05	1.09e-06	-0.75392	mRNA	NM_005309	RefSeq	144504081	144507172	GPT	glutamic-pyruvate transaminase (alanine aminotransferase)		ACATTGAGAGGCGTGACGGAGGCATCCCTGCGGACCCCAACAACGTCTTCCTGTCCACAG	NM_005309
CUST_118753_PI430048170	6.49e-05	1.1e-06	0.864879	ncRNA	NONHSAT010464	NONCODE	239052747	239052903			-	AGAAATAAAATCAGGTACAACTCCAAAAGGAGACATTGGAGAAGAACCAAGCTGGGTCTA		NONHSAT010464
CUST_5127_PI430048170	0.00267	0.000214	2.05397	ncRNA	NR_024216	RefSeq	47944921	47945043	SNAR-A13	small ILF3/NF90-associated RNA A13		TTCCAGGGCACGAGTTCGAGGCCAGCCTGGTCCACATGGGTCGGAAAAAAGGACTTTTTT	NR_024216
CUST_51845_PI430048170	6.5e-05	1.1e-06	0.784091	ncRNA	lnc-ICA1L-4:1	lncipedia	202884237	202894765			-	CTTCATATACATCTGTTTAGTTTTGCAGTGGCTCCTGGGATAAGATGCTAAAGATCTGGT		lnc-ICA1L-4:1
CUST_78373_PI430048170	6.5e-05	1.1e-06	3.10224	mRNA	NM_018685	RefSeq	36389802	36453791	ANLN	anillin%2C actin binding protein%2C transcript variant 1		TCACTGAATGCGAAATGACGAAATCTAGCCCTTTGAAAATAACATTGTTTTTAGAAGAGG	NM_018685
CUST_56732_PI430048170	6.51e-05	1.1e-06	0.804198	ncRNA	lnc-AL355490.1-3:2	lncipedia	97436539	97445973			-	ATGTCCGAGCAACTGAAAAAGACAAGGTTGTTGGTTGAAATTTATAAGAGTTTCCGCCCA		lnc-AL355490.1-3:2
CUST_138527_PI430048170	6.51e-05	1.1e-06	-4.83772	mRNA	NM_021146	RefSeq	11189288	11195981	ANGPTL7	angiopoietin-like 7		AAGGAGCTTCCTTTTAAATTTTGTCTGTAGGAAATGGTTGAAAACTGAAGGTAGATGGTG	NM_021146
CUST_33241_PI430048170	6.53e-05	1.11e-06	0.937001	ncRNA	ENST00000421894	ENSEMBL_GENCODE	31563166	31564076	HM13-IT1		+	TCCAACACACAGGTAGTCCCAGTGCTAGCATTGGTCTAGGTAAGGGTCACCTCTGCCTTT		ENST00000421894
CUST_58425_PI430048170	6.53e-05	1.11e-06	0.747598	ncRNA	lnc-ADAMTS8-2:1	lncipedia	130544642	130544856			-	ATTTCCAGAGATACTTAATCCTCAATTCGGGACTCTTTGCTTCAGGAGTTTGGCTGGCCA		lnc-ADAMTS8-2:1
CUST_30333_PI430048170	0.000128	3.11e-06	2.04768	ncRNA	ENST00000614165	ENSEMBL_GENCODE	30899110	30899651	RP13-753N3.3		-	GTCCTGTTTTTTCCAGAACATAGAAATCTGCTTTAGGCATCTTTGAAATGATCGAGGAAA		ENST00000614165
CUST_32967_PI430048170	6.54e-05	1.11e-06	-2.32033	ncRNA	ENST00000594816	ENSEMBL_GENCODE	58428632	58431148	CTD-2619J13.17		+	GCAGACCTATGTGTCACTCATAACTGAAATTCAAATAAATATTTTGTGGATTTCCTGTGG		ENST00000594816
CUST_93214_PI430048170	6.56e-05	1.12e-06	-2.48678	ncRNA	lnc-LRRC58-3:1	lncipedia	120404894	120411326			-	CCCCTACATGTAGAGCAGCTGTAATCCTAGAAATACAGAAAAATTTTCTTTTTTCCTTCA		lnc-LRRC58-3:1
CUST_31632_PI430048170	0.00683	0.000753	2.04503	ncRNA	ENST00000584252	ENSEMBL_GENCODE	49023703	49048474	RP11-15F12.1		-	CGATGTGGTAATGTCGCTGTTAAAACGCACTTCTCATTGTTAGAAATAAAAATGACTCAA		ENST00000584252
CUST_80736_PI430048170	6.63e-05	1.13e-06	-2.47617	ncRNA	NR_003670	RefSeq	39813783	39874566	KGFLP2	keratinocyte growth factor-like protein 2		CCCTAAAACAGAGTTGGGAAAATATCAATTAACTGGACTCTCTGGTTTGAATTCTCAATA	NR_003670
CUST_121231_PI430048170	6.66e-05	1.14e-06	0.944432	ncRNA	NONHSAT062956	NONCODE	18285345	18285496				CTGGAAATAAAATCAGGTACAACTCCAAAAGGACACTGGAGAAGAACCAAGCTGGGTCTA		NONHSAT062956
CUST_142767_PI430048170	6.66e-05	1.14e-06	2.37318	mRNA	NM_002256	RefSeq	204190340	204196491	KISS1	KiSS-1 metastasis-suppressor		GAGGGGGCGCTGGAGCTTCCAACCCGAGGCAATAAAAGAAATGTTGCGTAACTCAAAAAA	NM_002256
CUST_93418_PI430048170	6.66e-05	1.14e-06	1.08243	mRNA	NM_012453	RefSeq	73568945	73578683	TBL2	transducin (beta)-like 2		AAGCAAATGGATTTCCACCTGACAAATCTTCGGGATCCAAGAAGCAGAAACAATATCAGC	NM_012453
CUST_66112_PI430048170	6.66e-05	1.14e-06	-2.25153	mRNA	NM_032827	RefSeq	85753785	85791383	ATOH8	atonal homolog 8 (Drosophila)		TTCCTTGTGCTCAAATGGCCAAAGCTGTTCACGTCTGTGCTCAACCATCTGCTTCAAATT	NM_032827
CUST_127403_PI430048170	6.67e-05	1.14e-06	0.84517	mRNA	NM_017853	RefSeq	72084856	72093640	TXNL4B	thioredoxin-like 4B%2C transcript variant 1		AACCTCGTGGTGGTTATTGAAACAGATTTATTAGAAGGAGAGGGTAGGTGCAGAGCTGGA	NM_017853
CUST_36589_PI430048170	0.00763	0.000872	2.04255	ncRNA	ENST00000516250	ENSEMBL_GENCODE	5573928	5574019	AC012667.1		+	AAATACTGGCCTCAGCAGATTGAGGAGAACACCACAGTGGTCACCACACAGTCCGCCGAG		ENST00000516250
CUST_71530_PI430048170	6.7e-05	1.15e-06	0.833039	ncRNA	ENST00000601296	ENSEMBL_GENCODE	63861212	63864293	RP4-591C20.9		+	ATGTTTTCTCCATTTGCTGCCTTTCATTCTTTCCAGAGATTCTTGCTCAACCCAACCAGG		ENST00000601296
CUST_136450_PI430048170	6.71e-05	1.15e-06	1.01019	mRNA	NM_152735	RefSeq	4903301	4906266	ZBTB9	zinc finger and BTB domain containing 9		GAATCGGGGGTGGGACTTGCAGTTACTTAAAATTTTTTAATAAACTGTGCCCTGAAACCT	NM_152735
CUST_119319_PI430048170	6.72e-05	1.16e-06	-2.58849	ncRNA	NR_120541	RefSeq	69012353	69018447	MRGPRF-AS1	MRGPRF antisense RNA 1	-	GGACTGAATAACTAACCTTCAAAAAGTTTGCAGTAGCCTTGTCACTCCTAAAAATAACAA	NR_120541
CUST_56513_PI430048170	9.03e-06	5.19e-08	2.04217	ncRNA	lnc-ZNF503-3:1	lncipedia	75276375	75276646				ACAAAATCAGGGGCGCTGCTGACACCCGGAAACCCACCACAACTCCAGGAAGGAAACCAA		lnc-ZNF503-3:1
CUST_71680_PI430048170	6.8e-05	1.17e-06	-2.23263	ncRNA	lnc-GABPA-8:2	lncipedia	25702177	25710179			+	GTACAGAGAGAATGATGATTACCCAGACAAGAAATATGGTCACTAATTTGATTTCATAGG		lnc-GABPA-8:2
CUST_71901_PI430048170	2.47e-05	2.37e-07	2.04128	ncRNA	NR_048535	RefSeq	42849225	42879589	WDR4	WD repeat domain 4%2C transcript variant 7	-	TGACAGTAAGCGTCTGATTCTTTTCCGTACAAAACCATGGCAATGTCTGAGTGTCAGGAC	NR_048535
CUST_130289_PI430048170	6.84e-05	1.18e-06	-3.37906	mRNA	NM_001204087	RefSeq	154697465	154870278	KCNN3	potassium channel%2C calcium activated intermediate/small conductance subfamily N alpha%2C member 3%2C transcript variant 3		GAAGCTGGAGAGAATGGGCATTTTTAAATGTTACGGCATATGCTAATATAATATTATGGC	NM_001204087
CUST_135266_PI430048170	6.87e-05	1.19e-06	0.878098	mRNA	NM_152407	RefSeq	149345413	149354583	GRPEL2	GrpE-like 2%2C mitochondrial (E. coli)		CAGGCAGTTGGGTATTGATATGTTATTTGGTGCTCTCATTCATGGCAAAGGATTTGATAA	NM_152407
CUST_27057_PI430048170	0.00114	6.7e-05	2.04112	ncRNA	NR_024334	RefSeq	65410592	65412617	FUT8-AS1	FUT8 antisense RNA 1	+	GTATTTATTGTCAGCTCTTTAAACAAAAAGCACTCTATGAAGTGCTGTACTTTACAGTCG	NR_024334
CUST_120582_PI430048170	6.91e-05	1.2e-06	-2.36226	ncRNA	NONHSAT047895	NONCODE	83134126	83136721			-	TGTGTCTAATGTTTTGTGTGGCACCTGTCACATTGTTAGAGCTCAATAAACGTTCCCCCC		NONHSAT047895
CUST_138369_PI430048170	6.92e-05	1.2e-06	-2.25782	mRNA	NM_175061	RefSeq	27830573	28180818	JAZF1	JAZF zinc finger 1		CAGAGGTTTGTTTTAGAACTGAAGGCAATTTAATCAAAATTCCTGTCAAGAAAAGCTGCT	NM_175061
CUST_57741_PI430048170	6.92e-05	1.2e-06	1.20748	mRNA	NM_003860	RefSeq	66002078	66004146	BANF1	barrier to autointegration factor 1%2C transcript variant 1		AATGTTTCTTTTTTAAAGGCGGCTCTTGAAGCGACCCGGAAGCGGAAGTGGAAGAAAGTT	NM_003860
CUST_62534_PI430048170	0.0193	0.00308	2.041	ncRNA	NR_130735	RefSeq	22915	25112	WASIR2	WASH and IL9R antisense RNA 2		GTCAACAACAGTCTTTTGTTGAGAAAGTCTGTTTAATTGGCAGTGTATTTGTAATGGTAC	NR_130735
CUST_135188_PI430048170	6.95e-05	1.21e-06	-2.74927	mRNA	NM_001136191	RefSeq	11164266	11197567	KANK2	KN motif and ankyrin repeat domains 2%2C transcript variant 2		TTTCACTTTCTGATCACGGTACGTCCATAAAGCCAGTATTACACTTAAATGAAGTATTCT	NM_001136191
CUST_141842_PI430048170	6.96e-05	1.21e-06	-1.11769	mRNA	NM_001242891	RefSeq	114716912	114758050	CSDE1	cold shock domain containing E1%2C RNA-binding%2C transcript variant 4		CTGTTAATGGCGAAAGAATGGAAGCGAATAAAGTTTTACTGATTTTTGAGACACTAGCAA	NM_001242891
CUST_128844_PI430048170	6.96e-05	1.21e-06	0.805076	mRNA	NM_173810	RefSeq	62728479	62738636	TTC9C	tetratricopeptide repeat domain 9C		TTCTGCACAAACTTCACTACTTAGACAGTCTGAGTCTTTTTCTGTCTATCCATCTGTTTA	NM_173810
CUST_140396_PI430048170	6.97e-05	1.22e-06	-3.21271	mRNA	NM_001353	RefSeq	4963261	4977966	AKR1C1	aldo-keto reductase family 1%2C member C1		GCTACAGCAAAGCCCATTGGCCAGAAAGGAAAGACAATAATTTTGTTTTTTCATTTTGAA	NM_001353
CUST_115373_PI430048170	6.97e-05	1.22e-06	1.51402	mRNA	NM_012145	RefSeq	241675741	241686968	DTYMK	deoxythymidylate kinase (thymidylate kinase)%2C transcript variant 1		TGAAATCGGCAAACTTCTGAGTTCCTACTTGCAAAAGAAAAGTGACGTGGAGGATCACTC	NM_012145
CUST_125471_PI430048170	0.00418	0.000389	2.03722	ncRNA	ENST00000565297	ENSEMBL_GENCODE	78837529	78840522	RP11-79H23.3			GTCGGAATATAGCTTTGTAATGAATACATTCGTCTTAAAACTGACTTGGCTTTTTCTCCT		ENST00000565297
CUST_81605_PI430048170	7e-05	1.22e-06	1.11778	mRNA	NM_006406	RefSeq	23667527	23686397	PRDX4	peroxiredoxin 4		TCTGTTGATTCACAGTTTACCCATTTGGCCTGGATTAATACCCCTCGAAGACAAGGAGGA	NM_006406
CUST_137131_PI430048170	7.01e-05	1.23e-06	1.26744	mRNA	NM_002156	RefSeq	197486583	197499916	HSPD1	heat shock 60kDa protein 1 (chaperonin)%2C transcript variant 1		GAGAGTGAGAATAATTGTGTACAAAGTAGAGAAGTATCCAATTATGTGACAACCTTTGTG	NM_002156
CUST_33031_PI430048170	0.0141	0.00199	2.03268	ncRNA	ENST00000619370	ENSEMBL_GENCODE	6065966	6067897	RP5-1056H1.2			CAACACCTAGAATCTGGAGTATCTCTCATGGGTTCCATAAATAGTTGGCATAATTAATAA		ENST00000619370
CUST_11913_PI430048170	0.0311	0.00587	2.03225	ncRNA	ENST00000419190	ENSEMBL_GENCODE	202000094	202010353	RP11-465N4.4		+	AACGATATGGACTTGTGCAAATGCAAAGCAATGGTGAAGTCATCACGAACCGCACAGACT		ENST00000419190
CUST_133446_PI430048170	7.03e-05	1.23e-06	-1.76126	mRNA	NM_147164	RefSeq	34551431	34589737	CNTFR	ciliary neurotrophic factor receptor%2C transcript variant 1		ATATACAGGGTGGGGGGAGTGGGCGGTTCTCATTAAACGTCACCATTTCATGAGAAAAAA	NM_147164
CUST_28313_PI430048170	7.03e-05	1.23e-06	-2.2642	ncRNA	ENST00000616099	ENSEMBL_GENCODE	83962176	83962583	RP11-342A23.2		+	GCTTATTTCCTCATCCTTCTTAGTAGCAAGTCAATAAATACTCTCCTAAGTCAAATTGTC		ENST00000616099
CUST_97908_PI430048170	7.04e-05	1.24e-06	0.650823	ncRNA	ENST00000617702	ENSEMBL_GENCODE	120913328	121001622	LINC00869		+	AAAGAAGGCTCACAGCTGATCCAGTCCATTCAGCAGTCCGTTGAAAGGCTCCTAGTCTAA		ENST00000617702
CUST_58770_PI430048170	7.08e-05	1.24e-06	-3.05174	ncRNA	lnc-GOLT1B-2:4	lncipedia	21527935	21532523			+	GTCTCTGTAACTTGGAATTGCAATTTCACTGTGTTAAGTAATCAGAACTCTGCTTATAAG		lnc-GOLT1B-2:4
CUST_99130_PI430048170	7.08e-05	1.25e-06	-3.25643	ncRNA	NR_111893	RefSeq	67059459	67294592	CNTNAP3P2	contactin associated protein-like 3 pseudogene 2	+	AAGATGGAACCCCACTGAGCTGGTGGGTTGGAAGAACCAATGAAACACACACTTCCTGGG	NR_111893
CUST_92408_PI430048170	0.00386	0.000351	2.03044	ncRNA	lnc-FTSJ1-2:1	lncipedia	48464194	48464844			-	TCTCAGAATCAAACCAAAAATCTAAAAGGATACACACAGAGAGTAAAGATCAAGCACTCA		lnc-FTSJ1-2:1
CUST_41871_PI430048170	7.09e-05	1.25e-06	0.506964	ncRNA	NR_110184	RefSeq	59133972	59142808	LOC101927204	uncharacterized LOC101927204		TACTATAACCACTTGGAACCACTGTGTTTCTGGTCCATCTTGTGAGGCCCATCTTTGGTT	NR_110184
CUST_138926_PI430048170	7.11e-05	1.25e-06	-3.34197	mRNA	NM_001025195	RefSeq	26724	57068	CES1	carboxylesterase 1%2C transcript variant 1		GGAGCAAGTTTTGTATTTGTGACCTCAGCTTTGGGAATAAAGGATCTTTTGAAGGCCAAA	NM_001025195
CUST_36524_PI430048170	0.00962	0.00119	2.03019	ncRNA	ENST00000390176	ENSEMBL_GENCODE	30774228	30774319	AL590726.1			TACTGGTCTCAGCAGATTGAGGAGAGCACCACAGTGGTCACCATGCAGTCCGCTGAGGTT		ENST00000390176
CUST_134833_PI430048170	7.15e-05	1.26e-06	-1.10804	mRNA	NM_001007189	RefSeq	140125935	140128806	IGIP	IgA-inducing protein		TAGCGAGGTCTGCTGTACTGCTTATTGAAGTATTGTGATTATTTTAGGCATTGATTCTTA	NM_001007189
CUST_102074_PI430048170	7.16e-05	1.27e-06	3.48227	mRNA	NM_020394	RefSeq	246985322	247008093	ZNF695	zinc finger protein 695%2C transcript variant 1		TGAGAAGATATGAAAGATGTTGTCTTGAGAAATTACGCTTAAGGAATGACTGGGAAATTG	NM_020394
CUST_140736_PI430048170	7.16e-05	1.27e-06	2.16393	mRNA	NM_003568	RefSeq	150982022	150995638	ANXA9	annexin A9		CCTGTACCCTGGCCAGAACATCTCACTGATACTCGAATTCTTTTGGCAAACTTCAAAAAA	NM_003568
CUST_58295_PI430048170	7.16e-05	1.27e-06	-2.30242	mRNA	NM_004205	RefSeq	119355214	119381726	USP2	ubiquitin specific peptidase 2%2C transcript variant 1		ATCTCTTTGTTGGGCAGCTAAAGAGCTCGCTGACGTGTACAGATTGTGGTTACTGTTCTA	NM_004205
CUST_35144_PI430048170	7.16e-05	1.27e-06	0.709815	ncRNA	ENST00000602419	ENSEMBL_GENCODE	151497726	151498354	WI2-80269A6.1		+	ATACATTCTATACCCCACAGGGTACGCCCCATGGTGATGAAAATAAAATGAATCTGTTGT		ENST00000602419
CUST_69096_PI430048170	7.16e-05	1.27e-06	0.898712	mRNA	NM_001198842	RefSeq	69585681	69601577	CCT2	chaperonin containing TCP1%2C subunit 2 (beta)%2C transcript variant 2		GCAATTCATATTATCAAGAAGCTAGGAGGAAGTTTGGCAGATTCCTATTTAGATGAAGGC	NM_001198842
CUST_73025_PI430048170	7.16e-05	1.27e-06	1.27126	mRNA	NM_006764	RefSeq	50287731	50292595	IFRD2	interferon-related developmental regulator 2		AGGAGTATGTGGACTGTCTCACAGACAAGAGTGCCAAGACCCGGCAGGGTGCTCTTGAGA	NM_006764
CUST_96733_PI430048170	7.17e-05	1.27e-06	-1.50096	ncRNA	lnc-RAB9B-2:4	lncipedia	103776575	103832228			+	TTTGCTGCAGAGACATCTGGAAATGTGGATTGAGGGTGGAAATAAAATGAAGATGTCCTG		lnc-RAB9B-2:4
CUST_116839_PI430048170	9.93e-06	5.84e-08	2.03017	ncRNA	lnc-KISS1-1:1	lncipedia	204198941	204201701			-	TGACAAGAGCCCATGAGGAGAGGGGATCCAGACGCAGTTGTAGCTGAGTGTGGCTGTAGA		lnc-KISS1-1:1
CUST_80068_PI430048170	0.000101	2.15e-06	2.0283	ncRNA	lnc-RAD54B-1:2	lncipedia	94371951	94372257			-	GGCACATAGTGAAAGATTACTTCTGACATTCCATTGCTCTTCTTTTGAAAATTAGTATGG		lnc-RAD54B-1:2
CUST_140067_PI430048170	7.23e-05	1.29e-06	-3.27953	mRNA	NM_001193460	RefSeq	65278642	65466907	MSRB3	methionine sulfoxide reductase B3%2C transcript variant 3		GCAATATCTGTTACTAGAGAACATTCCCATGTGTTTAAACTCTTCACTTCTTAGATGCAT	NM_001193460
CUST_137020_PI430048170	7.25e-05	1.29e-06	1.24353	mRNA	NM_015259	RefSeq	44226826	44241004	ICOSLG	inducible T-cell co-stimulator ligand%2C transcript variant 1		GACAGCCATCTCCAGAAACCTGACTTAAGAGAGTAAGATGCAAATCGTGCCTGTAAAAAA	NM_015259
CUST_128776_PI430048170	7.25e-05	1.29e-06	2.58325	mRNA	NM_001258316	RefSeq	172750684	172821474	ECT2	epithelial cell transforming 2%2C transcript variant 2		GATAGTGTGTGGAATTTTATTTTGAAGGATAAGACCATGGGAAAATTGTGGTAAAGACTG	NM_001258316
CUST_139004_PI430048170	7.27e-05	1.3e-06	-1.56514	mRNA	NM_013943	RefSeq	24745268	24844324	CLIC4	chloride intracellular channel 4		CATAAAGGATTCTTTTTTCCCCCCTCATGAAAATAAACAACAACTTGGGGTAAAAGTGAA	NM_013943
CUST_99489_PI430048170	7.27e-05	1.3e-06	2.66885	mRNA	NM_002358	RefSeq	120059423	120066858	MAD2L1	MAD2 mitotic arrest deficient-like 1 (yeast)		CAATTCTGAGGAAGTCCGCCTTCGTTCATTTACTACTACAATCCACAAAGTAAATAGCAT	NM_002358
CUST_97096_PI430048170	7.28e-05	1.3e-06	-1.20378	ncRNA	NR_109875	RefSeq	115602154	115620419	LOC101927100	uncharacterized LOC101927100%2C transcript variant 2	-	TTGGAACACTGCTCAGCCTTCCCAACCTTCTTTTACCACTGATGTTTCTACCTTAGTGAT	NR_109875
CUST_137750_PI430048170	7.29e-05	1.31e-06	-1.82693	mRNA	NM_001080457	RefSeq	50516892	50568045	LRRC4B	leucine rich repeat containing 4B		TTTTGATACTGAAGGGAGGTTTGCGTCAACGACTACCTGCTCTGTAATTACTTTAAAAAA	NM_001080457
CUST_70904_PI430048170	7.32e-05	1.31e-06	1.16996	mRNA	NM_001270691	RefSeq	4148778	4187747	SMOX	spermine oxidase%2C transcript variant 6		AGCGCGGACGGTATGCAAAGTTGTGAATCCAGTGGTGACAGTGCGGATGACCCTCTCAGT	NM_001270691
CUST_133892_PI430048170	7.33e-05	1.32e-06	-3.01861	mRNA	NM_018059	RefSeq	4799108	4883704	RADIL	Ras association and DIL domains		GCAGATGACGTGAAATTGTGATGTTTGTTACAGAGCTTTTATGTTTAAAGACTTCAATGG	NM_018059
CUST_93456_PI430048170	7.34e-05	1.32e-06	1.166	mRNA	NM_001242841	RefSeq	3357926	3379222	ZNF195	zinc finger protein 195%2C transcript variant 4		GTGGCCTTGATAATTTATATTTAAGGAAAGACTGGGAAAGTTTAGATGAGTGTAAGTTGC	NM_001242841
CUST_92138_PI430048170	7.35e-05	1.32e-06	3.53366	mRNA	NM_007036	RefSeq	54977866	54985586	ESM1	endothelial cell-specific molecule 1%2C transcript variant 1		GCATAAGGACATGTAATTTTTGAAGACCAAATGTGATGCATGGTGGATCCAGAAAACAAA	NM_007036
CUST_142864_PI430048170	7.41e-05	1.33e-06	-3.74089	mRNA	NM_006006	RefSeq	114059708	114250675	ZBTB16	zinc finger and BTB domain containing 16%2C transcript variant 1		ATCCCGCCCGACTGGAGGATAGAGAAGACGTACCTCTACCTGTGCTATGTGTGAAGGGAG	NM_006006
CUST_68390_PI430048170	7.42e-05	1.34e-06	-1.11791	ncRNA	ENST00000589281	ENSEMBL_GENCODE	37243776	37247506	RP11-95O2.5		-	CTGTGAACTTTGAGTTGATTTGAACTTACGGATGGGGGACTTTTCTCCACTCTCATGTGA		ENST00000589281
CUST_78360_PI430048170	7.42e-05	1.34e-06	-2.55251	ncRNA	lnc-TBX20-3:2	lncipedia	35079988	35162075			-	CAATAGTGCTTTGAAAAGTGGTAGTTATCTTGAAGATAGATACTCTTGCCAAATGCAAAG		lnc-TBX20-3:2
CUST_112326_PI430048170	0.00021	6.51e-06	2.02621	ncRNA	lnc-BPY2C-22:1	lncipedia	26586641	26591601				CTCTTTTTGGCCTACGAATATACCAGGAAGTTGATGATGAGCCAGTTGGAAGCATACTGA		lnc-BPY2C-22:1
CUST_65250_PI430048170	7.44e-05	1.34e-06	-2.33467	ncRNA	NR_033418	RefSeq	56368120	56379827	ZNF542P	zinc finger protein 542%2C pseudogene%2C transcript variant 1	+	TTCGGGTGCATTTATGAGAGTTCACCAGATTTTGGAAATATTTTCTATTCTGTAACCTAC	NR_033418
CUST_63354_PI430048170	0.0189	0.00297	2.0243	ncRNA	lnc-HELZ-5:1	lncipedia	67276117	67276351				CCCCAGATAGTGGATGGTAAAGAGGTGTGTGAGACCAACGACACCAAAGTTCTGAGACAT		lnc-HELZ-5:1
CUST_135453_PI430048170	7.49e-05	1.35e-06	-0.92723	mRNA	NM_001512	RefSeq	52977947	52995380	GSTA4	glutathione S-transferase alpha 4		GACTCTCCTCTGAGCTGTAATAAATAAAATGGTAGTAATGAATGCAATCAGTATTAGCCA	NM_001512
CUST_132642_PI430048170	7.5e-05	1.36e-06	2.40373	mRNA	NM_024745	RefSeq	46580555	46621399	SHCBP1	SHC SH2-domain binding protein 1		AATGATTAACTGTACAACCTGTATCTGCTGGGTGTTCTTGTTATCATATTGTAAAACAGC	NM_024745
CUST_37686_PI430048170	7.51e-05	1.36e-06	1.25887	mRNA	NM_198976	RefSeq	58981207	58995133	NELFCD	negative elongation factor complex member C/D		AGAACATTCCAGAACCCGTTGTGGAAAAACCCTTTCAAGAAGCTGTTTTAAGAGGCTCGG	NM_198976
CUST_54304_PI430048170	0.000787	4.01e-05	2.02379	ncRNA	lnc-CDC7-2:1	lncipedia	91328368	91329513			-	TCTTCAGCTAAGTGCAAGGAGCCAGAATCAAAGGGATCCACTAAGAAGAAGGCAAAGACT		lnc-CDC7-2:1
CUST_47769_PI430048170	7.51e-05	1.36e-06	-1.49204	ncRNA	lnc-TPO-4:1	lncipedia	1749873	1753929				GCACTCTGTGTCTGTAGCTTCCTGTGAGTATGCAATCATTTCAAAATTAAAAGTTTGTTA		lnc-TPO-4:1
Human-PGK1_3	7.54e-05	1.37e-06	0.869645											CONTROL
CUST_12662_PI430048170	7.56e-05	1.37e-06	0.537408	mRNA	NM_007266	RefSeq	27628995	27650846	GPN1	GPN-loop GTPase 1%2C transcript variant 1		TGGGACAATTATCACTGAAGCCCTTGCATCCTCATTTCCAACAGTTGTCATCTATGTAAT	NM_007266
CUST_134247_PI430048170	7.56e-05	1.38e-06	-1.14421	mRNA	NM_019858	RefSeq	6821796	6827418	GPR162	G protein-coupled receptor 162%2C transcript variant A-2		TGCCCTACTCAGCTTCCATCACCCCTAGCAATATGTATTAAAGTCTGAAGTGTTGCCATG	NM_019858
CUST_128890_PI430048170	7.57e-05	1.38e-06	-1.61317	mRNA	NM_001077620	RefSeq	76540038	76545376	PRCD	progressive rod-cone degeneration%2C transcript variant 1		AGGGCAAGGGTGGACCTTTAAATGGGGGAATTAAATCCTGACTATGACACTGTCAAAAAA	NM_001077620
CUST_78476_PI430048170	7.6e-05	1.38e-06	-1.52066	ncRNA	NR_120516	RefSeq	54330696	54349845	LINC01445	long intergenic non-protein coding RNA 1445%2C transcript variant 2		GAACAGCACTCCAGGACAGTAAATCATGAAATGGGAATAAAGCCTGTAATTTTAATTAAC	NR_120516
CUST_121380_PI430048170	7.6e-05	1.39e-06	0.920166	ncRNA	NONHSAT067562	NONCODE	52564075	52564231			-	AATAAAATCAGGTCCAACTTTAAAAGGAGACATTGGAGAAGAACCAAGCTGGGTCTATAA		NONHSAT067562
CUST_60252_PI430048170	0.00516	0.000517	2.02279	ncRNA	lnc-HNRNPA1L2-1:1	lncipedia	52473534	52475142			+	GGCCAACTAGGAACAACTTTAATGTCTTCTGATTTTGTTCTTAAAATTCAGCCAAAAGCT		lnc-HNRNPA1L2-1:1
CUST_136698_PI430048170	7.64e-05	1.4e-06	2.41645	mRNA	NM_001333	RefSeq	97029676	97039310	CTSV	cathepsin V%2C transcript variant 1		CCCTATGTGTGGTTCATGTGTATGTTTTGCCTATGAAAGTTGAAACTGTTTTCTAAATGT	NM_001333
CUST_70199_PI430048170	7.64e-05	1.4e-06	-2.80319	ncRNA	lnc-SH3GL3-3:1	lncipedia	83739783	83740199			+	TTGTCAGCTCTTGAACCCTGAGCATTGCATCACAGGTAAGGAATACCTATGCCAGTAACT		lnc-SH3GL3-3:1
CUST_138064_PI430048170	7.64e-05	1.4e-06	0.872651	mRNA	NM_001184	RefSeq	142449234	142578826	ATR	ATR serine/threonine kinase		CAGTGAAAGGGCATTCCAAAGCGCCACTGAATGAAACTGGAGAAGTTGTCAATGAAAAGG	NM_001184
CUST_96819_PI430048170	0.000129	3.13e-06	2.02178	ncRNA	lnc-CDKN2B-3:1	lncipedia	21969582	21970467			-	TAAAACTACTGAATTGGGCCACAAGCAAATGAATAAACTGAACGACTCTTAACCAAACCT		lnc-CDKN2B-3:1
CUST_48159_PI430048170	0.00707	0.000788	2.02176	ncRNA	lnc-PDCD6IP-2:8	lncipedia	34360769	34435462				TGTTCAGGAAAGCATGAAGTCAAATGGAAGCTAGTCCGTGACTGGATTCATCTTTTGGTA		lnc-PDCD6IP-2:8
CUST_112359_PI430048170	7.64e-05	1.4e-06	0.880305	ncRNA	lnc-GP2-1:1	lncipedia	20238971	20239247			-	CAACTGGGTCGGATCATACTAAAAGGAGATAATATTCCTCTGCTACAAAGTGTCTCCAAC		lnc-GP2-1:1
CUST_127707_PI430048170	7.64e-05	1.4e-06	-0.644211	mRNA	NM_002880	RefSeq	12583600	12664201	RAF1	Raf-1 proto-oncogene%2C serine/threonine kinase		GCCAGGAATACAGGTTTTCTTGATGATTTGGGTTTTAATTTTGTTTTTATTGCACCTGAC	NM_002880
CUST_133602_PI430048170	7.66e-05	1.41e-06	-3.24765	mRNA	NM_002398	RefSeq	66435399	66572759	MEIS1	Meis homeobox 1		CAAGCCCAGTTGTAGTCGTTTGAGTGCAGTAATGAAATCTGAATCTAAAATAAAAACAAG	NM_002398
CUST_16406_PI430048170	0.000529	2.3e-05	2.01684	ncRNA	ENST00000448804	ENSEMBL_GENCODE	117361349	117372735	AC113617.1			TCCCTTTGGTTCTCTAGGAAATTGAGTTCAGGAAAGCTACCAGGAATAAAACTCTTACTT		ENST00000448804
CUST_16691_PI430048170	0.0122	0.00165	2.01669	ncRNA	ENST00000625016	ENSEMBL_GENCODE	157818101	157818572	RP11-364P22.3			CTGAAGTCTGTAGCCATCTAACACAGATTTTAATTCTCATTTATCAGCATCATCTAGAAC		ENST00000625016
CUST_145034_PI430048170	7.7e-05	1.42e-06	-2.92371	mRNA	NM_133489	RefSeq	57619909	57626151	SLC26A10	solute carrier family 26%2C member 10		GACCCTTGAACCCCCTTACCTAACGTAACTAATAAAATGAAGCTGAGAGCTTTGGAATCC	NM_133489
CUST_139658_PI430048170	7.7e-05	1.42e-06	-0.993795	mRNA	NM_001286431	RefSeq	111299030	111483715	REV3L	REV3-like%2C polymerase (DNA directed)%2C zeta%2C catalytic subunit%2C transcript variant 2		GCATTGTGAGGAACTGTGCAAAGACATTTTTGTTACAAACCTGTGGGCCTGTTGCAATAC	NM_001286431
CUST_97309_PI430048170	0.000126	3e-06	2.01575	ncRNA	lnc-VSIG7-3:1	lncipedia	10612451	10613375				CTCTTTTTGGCCGACGAATATACCAGGAAGTTGATGATGAGCCAGTTGGAAGCATACTGA		lnc-VSIG7-3:1
CUST_110339_PI430048170	7.74e-05	1.43e-06	0.775961	mRNA	NM_001289103	RefSeq	11435256	11450967	PRKCSH	protein kinase C substrate 80K-H%2C transcript variant 4		ACCTGGGGCTCATGGATTGGCCCCGACCACGACAAGTTCAGTGCCATGAAGTATGAGCAA	NM_001289103
CUST_130235_PI430048170	7.74e-05	1.43e-06	-3.62233	mRNA	NM_032528	RefSeq	106801599	106887107	ST6GAL2	ST6 beta-galactosamide alpha-2%2C6-sialyltranferase 2%2C transcript variant 1		GCTTGAAGTTTTCCAGGAGTCGCATTTTAAAAGTGTTTGTACACATTTTAACACTTGGAT	NM_032528
CUST_119670_PI430048170	7.76e-05	1.44e-06	-1.11493	mRNA	NM_001199771	RefSeq	55720366	55724742	RDH5	retinol dehydrogenase 5 (11-cis/9-cis)%2C transcript variant 1		AGTCTCTTAAACAAAAGCAAAAGAATAAGCTTCGGGCGCTGTAGTACCTGCCAGCTTTCG	NM_001199771
CUST_82244_PI430048170	3.01e-05	3.18e-07	2.01244	ncRNA	lnc-GPR50-3:1	lncipedia	150985573	150986118			+	GCGATGTCCGGGAAAGAGAAATCTAAATTTGATGAAATGGCAAAGGCAGATAAAGTGCGC		lnc-GPR50-3:1
CUST_14738_PI430048170	7.83e-05	1.45e-06	-1.99527	ncRNA	NR_046757	RefSeq	43346918	43351962	SNRK-AS1	SNRK antisense RNA 1	+	AAACCTGAACACCACGTCTTGTTTCTTTGGTTCTTAGATCACATAAAGGTATATTACTAC	NR_046757
CUST_63690_PI430048170	7.83e-05	1.45e-06	-2.52783	ncRNA	lnc-LPIN2-3:1	lncipedia	3135057	3142019			-	CCAGGAGTAAAAATGGTGACATCCTTCTTTCATATTATAAATTTACTCGATGGCTGTACT		lnc-LPIN2-3:1
CUST_108264_PI430048170	7.85e-05	1.46e-06	0.878111	mRNA	NM_006360	RefSeq	32583766	32602873	EIF3M	eukaryotic translation initiation factor 3%2C subunit M		TCCTGTAAGATACACAGTGTATTGCAGCCTTATTAAAGTGGCAGCATCTTGTGGGGCCAT	NM_006360
CUST_60604_PI430048170	0.00189	0.000133	2.01148	ncRNA	NR_122113	RefSeq	15784953	15827434	DUXAP8	double homeobox A pseudogene 8		TCCGCGATTTCCTAGTGTATGTATATGAGAGTTTCTTGATCTCTTTATCTGTGGATGAAC	NR_122113
CUST_60521_PI430048170	0.018	0.00278	2.00821	ncRNA	lnc-IRS2-9:1	lncipedia	109212042	109216761				GGGTGGCTATGCTCTTCTTATTGCCACACAAAAGTCTAATGCAATTTATCATAAACATTA		lnc-IRS2-9:1
CUST_72207_PI430048170	7.89e-05	1.47e-06	-1.04395	mRNA	NM_015330	RefSeq	24270816	24417740	SPECC1L	sperm antigen with calponin homology and coiled-coil domains 1-like%2C transcript variant 1		ATACCGAGCCTTCCAAGAAGAAGCTAAGAAACAAATTGAAGATTTGAATATGACGTTAGA	NM_015330
CUST_135814_PI430048170	7.9e-05	1.47e-06	0.916665	mRNA	NM_001037283	RefSeq	2354838	2380742	EIF3B	eukaryotic translation initiation factor 3%2C subunit B%2C transcript variant 2		TTTGAACAGAAGGATCGTTTGAGTCAGTCCAAAGCCTCAAAGGAATTGGTGGAGAGAAGG	NM_001037283
CUST_114415_PI430048170	0.000193	5.75e-06	2.00819	ncRNA	lnc-C6orf105-7:1	lncipedia	12295692	12314396			+	GGGGTCATATGGTCAAGTCTAAGGGGAAGTGGGCAGTAAATACAGGTTTTAAATAAACTA		lnc-C6orf105-7:1
CUST_137510_PI430048170	7.91e-05	1.47e-06	-2.60523	mRNA	NM_080283	RefSeq	68974631	69060995	ABCA9	ATP-binding cassette%2C sub-family A (ABC1)%2C member 9		GAGTTTAGATTGTGAGTCCATGTTTTGTCTGTTGTGCCTATAAAGGAAATTTGAAATCTG	NM_080283
CUST_87949_PI430048170	0.000595	2.72e-05	2.00791	ncRNA	lnc-WRNIP1-39:1	lncipedia	2190796	2228773			-	GTAACCCTGAACAATGCATTTGCTGCATGGAATAGCTTTCTCAGTACAACTGTGTAGTGC		lnc-WRNIP1-39:1
CUST_135651_PI430048170	7.93e-05	1.48e-06	-1.55219	mRNA	NM_004737	RefSeq	33273075	33920428	LARGE	like-glycosyltransferase%2C transcript variant 1		TGCAATGTGACCAGCGAAAGCTGCATTTAATAAATGAAAGTACAGACTGTTTCTTCCCCA	NM_004737
CUST_79788_PI430048170	7.93e-05	1.48e-06	0.748954	mRNA	NM_178819	RefSeq	41578187	41625001	AGPAT6	1-acylglycerol-3-phosphate O-acyltransferase 6		TTTACAATAAGTCGTTGGAGGAATGCCATTAAAGTGAACTCCCCACCTTTGCACGCTGTG	NM_178819
CUST_75893_PI430048170	7.97e-05	1.49e-06	-1.56098	ncRNA	lnc-COMMD10-7:1	lncipedia	116029922	116031923				CTTAATTTCTTGTTTCAGTCAACGCTTCCCATCTTCAACCAGAGGAACTAAAAACTAAAA		lnc-COMMD10-7:1
CUST_134248_PI430048170	8.06e-05	1.51e-06	0.829542	mRNA	NM_002568	RefSeq	100702915	100722087	PABPC1	poly(A) binding protein%2C cytoplasmic 1		ATAGCTCAGAATGTCAGTTCTGTTTTAAGTAACAGAATTGATAACTGAGCAAGGAAACGT	NM_002568
CUST_135571_PI430048170	8.07e-05	1.51e-06	2.36085	mRNA	NM_173561	RefSeq	41026900	41039199	UNC5CL	unc-5 homolog C (C. elegans)-like		CAGGTGTTGTTAATTTGTTCAAAGGCAGGCAAACAATCTCTCTGGCAACACAATTTTCTT	NM_173561
CUST_4859_PI430048170	0.000455	1.86e-05	2.0071	ncRNA	NR_026583	RefSeq	45062617	45065411	RACGAP1P	Rac GTPase activating protein 1 pseudogene		AAGCCAAATGCTGCTCATGGAATGAACGATCTTTCTCTAGTTTCATTCAACTGATTTCCA	NR_026583
CUST_139080_PI430048170	8.07e-05	1.51e-06	-2.21756	mRNA	NM_032160	RefSeq	152308	162457	DSEL	dermatan sulfate epimerase-like		AAGGGTACCTGACATTCTAAGATATCAAGACACTTAATATGTGGGCTATTAGCTGCTTAT	NM_032160
CUST_134235_PI430048170	8.09e-05	1.52e-06	1.36201	mRNA	NM_001260477	RefSeq	42849225	42879275	WDR4	WD repeat domain 4%2C transcript variant 6		CTTCTCAACTTCCTAGGAATGTTTAGCAGCAACCTAATATACCAGGCAAAACTCAAAAAA	NM_001260477
CUST_141944_PI430048170	8.15e-05	1.53e-06	1.55552	mRNA	NM_001271909	RefSeq	89658046	89670458	SPATA33	spermatogenesis associated 33%2C transcript variant 4		GCTCAGAGAGCGAGCTTTGTGGTATTGATAAATGAATAAATTAGTATGTTCATGTTGGAA	NM_001271909
CUST_138521_PI430048170	8.16e-05	1.53e-06	-2.21457	mRNA	NM_016563	RefSeq	65053336	65068112	RASL12	RAS-like%2C family 12		ATCTGAACAAACTATGCAATACCACCTGCTCCCTTCCAGGAGCATTTTAATAAAAGATTT	NM_016563
CUST_48084_PI430048170	8.17e-05	1.54e-06	-1.2712	ncRNA	NR_038269	RefSeq	165750	166448	LOC100506844	uncharacterized LOC100506844		TCTAGTTTTCTGCCTCCTTTTAGAAAATGTGCTAAAGAACATACAGACACAGAGCAGACA	NR_038269
CUST_54094_PI430048170	0.000146	3.78e-06	2.00694	ncRNA	lnc-HOOK1-4:1	lncipedia	59887462	59922267			-	CTCGGGCTCAAATCCTTATTTGTTATTATTTAGCTGAATAACCCGGGCAGTTCACTGTTC		lnc-HOOK1-4:1
CUST_97943_PI430048170	0.000105	2.28e-06	2.00622	ncRNA	lnc-SRGAP2-1:1	lncipedia	206470638	206475135			+	CAGGACTCAGGTGTCTGACTCCTGCTAATCATTCCATTTAAAATTCCAACTTAAAAATTA		lnc-SRGAP2-1:1
CUST_49692_PI430048170	8.22e-05	1.55e-06	-4.09376	mRNA	NM_001145712	RefSeq	56114680	56116397	NUPR1L	nuclear protein%2C transcriptional regulator%2C 1-like		TGCCCAAGTGGATTAGCCTTTTTAGAGTTTATTAATTAAAAGAGAGCAGCAAGAATGGCA	NM_001145712
CUST_135495_PI430048170	8.22e-05	1.55e-06	-0.74222	mRNA	NM_017762	RefSeq	30938940	30991604	MTMR10	myotubularin related protein 10		GTTCAACAGTATTGAATGTGAAGGAAATTTTGATGGCTTAATAAAATTCCACAGCGACTG	NM_017762
CUST_95632_PI430048170	8.22e-05	1.55e-06	0.756657	ncRNA	lnc-FEZF2-8:1	lncipedia	60732143	60732636			-	TTTGATGAGGAGAACTTCATCCTGAAGCATAGAGGTACTGGCATCTTGCCCATGGCAAAT		lnc-FEZF2-8:1
CUST_36602_PI430048170	0.0107	0.00137	2.00611	ncRNA	ENST00000390181	ENSEMBL_GENCODE	60810957	60811052	AC079005.1		+	TCTCAGCAGATTGAAGAGAGCACCACAGTGGTCACCATGCAGTCTGCCGAGGTTGGAGCT		ENST00000390181
CUST_45430_PI430048170	3.07e-05	3.28e-07	2.00382	ncRNA	lnc-ZNF674-1:7	lncipedia	46323447	46327419				CACTAGGAGGATGGGAACCAGGGACAGAGAAGCTACTTGCTCTGCAGCTGTTTGGGCCAA		lnc-ZNF674-1:7
CUST_58628_PI430048170	8.27e-05	1.57e-06	-3.50445	ncRNA	lnc-MFAP5-3:2	lncipedia	8651728	8662888			-	ACAGTTTTGGCTGTTTTGGCTGATATTGCACCTTCCACAGATGACTTGGGTCCTAAGTGA		lnc-MFAP5-3:2
CUST_106364_PI430048170	8.27e-05	1.57e-06	1.82507	mRNA	NM_207311	RefSeq	119989843	120094495	CCDC64	coiled-coil domain containing 64		AGGAACCAGGACATGAGCCGGCAGTACGAGCAGATGCATAAGGAGCTGACAGACAAGCTC	NM_207311
CUST_127195_PI430048170	8.27e-05	1.57e-06	0.780926	mRNA	NM_001159936	RefSeq	43164173	43172570	EBNA1BP2	EBNA1 binding protein 2%2C transcript variant 1		TCACGACACACTTTGATCCCTTCTGTTGGTGTCATGTTGTAAACATTTCTTTCAATAAAC	NM_001159936
CUST_117835_PI430048170	8.34e-05	1.59e-06	0.694824	ncRNA	lnc-MAGEB5-6:1	lncipedia	26748028	26749090				TGGGGACATTGCTTTTTGGGCTTTTGGTTTGGGGGCGCCCTCTCTGCTCCTCCATTGTTC		lnc-MAGEB5-6:1
CUST_131935_PI430048170	8.34e-05	1.59e-06	-4.3157	mRNA	NM_020433	RefSeq	44111696	44187578	JPH2	junctophilin 2%2C transcript variant 1		TTGGCTGGAATCCAGGACTGTATTTTCATGGAGAAGAACCTGCAGATTCTTCCATCCTCA	NM_020433
CUST_124207_PI430048170	8.34e-05	1.59e-06	-1.74577	ncRNA	ENST00000624649	ENSEMBL_GENCODE	122436789	122439223	RP3-425C14.4			GGGGGAAATTTTTAATTACTGAAACTATTTAGGAGCTGTGGGATTACATGTCTATCTTCA		ENST00000624649
CUST_109062_PI430048170	0.000158	4.23e-06	2.00357	ncRNA	lnc-MRP63-6:1	lncipedia	21373668	21376658			-	GGTGCATGCAAATCTTTTTATCTGAATGTAGAAATGCAAAAAGTACCAGGAGAACATTTC		lnc-MRP63-6:1
CUST_130991_PI430048170	8.35e-05	1.59e-06	-1.87783	mRNA	NM_015463	RefSeq	68293009	68320051	CNRIP1	cannabinoid receptor interacting protein 1%2C transcript variant CRIP1a		TAGCTTAAGGTATTGTGCAATGGCCTAGCCTAGTAGAAATGGGGGAAAAGCATTGCTGTG	NM_015463
CUST_145205_PI430048170	8.35e-05	1.59e-06	-2.81885	mRNA	NM_030774	RefSeq	4680170	4697846	OR51E2	olfactory receptor%2C family 51%2C subfamily E%2C member 2		TGCTCTGTACCTGTCAAAAATTTTGAATGTACACCACATGCTATTGTCTGAACTTGAGTA	NM_030774
CUST_59516_PI430048170	8.35e-05	1.6e-06	-2.56925	ncRNA	lnc-UNG-3:1	lncipedia	109235306	109236377			+	CTACAGGTTTCTGTCTTGCTTGAATAATTTTCAGTACTTGCTGATGTACTCAGTAAGACA		lnc-UNG-3:1
CUST_139751_PI430048170	8.35e-05	1.6e-06	0.860785	mRNA	NM_003374	RefSeq	133971874	134005133	VDAC1	voltage-dependent anion channel 1%2C transcript variant 1		GTCTTCCATTTTGTTGGAATTAGATCCTCCCCTTCAAATGCTGTAATTAACAACACTTAA	NM_003374
CUST_62306_PI430048170	8.37e-05	1.6e-06	-2.3407	ncRNA	lnc-BTBD1-2:1	lncipedia	83134125	83136721			-	GGTACTGTGTCTAATGTTTTGTGTGGCACCTGTCACATTGTTAGAGCTCAATAAACGTTC		lnc-BTBD1-2:1
CUST_144194_PI430048170	8.38e-05	1.6e-06	2.96045	mRNA	NM_001018113	RefSeq	14843406	14873062	FANCB	Fanconi anemia%2C complementation group B%2C transcript variant 1		GGCTTACTGTAGTAGAAACTTTAGTTTTGATGATGCACAAAATAAACAGCAGTGGTTCTC	NM_001018113
CUST_134145_PI430048170	8.38e-05	1.6e-06	-2.76191	mRNA	NM_198560	RefSeq	9498360	9553802	LHFPL4	lipoma HMGIC fusion partner-like 4		TTTAAGCTTCAGTGCAGGTGGAATGACATTCAAATAAAGAAACACTTTCTATCACCCAAA	NM_198560
CUST_127463_PI430048170	8.48e-05	1.63e-06	1.22926	mRNA	NM_001287036	RefSeq	112486967	112665311	KIAA1958	KIAA1958%2C transcript variant 1		GCTCCTAGATACTTGGTGGTCAATAGAACTGATTTGATTAACTTTCATTTAACTGTGGTT	NM_001287036
CUST_111896_PI430048170	3.78e-06	1.24e-08	2.00315	ncRNA	lnc-SLC4A2-3:3	lncipedia	151134481	151136560			+	CTCATTATCTTTGTTACTGTAATTACATTATCCGCTGCTTTATGCAGAATTATCCTCCGA		lnc-SLC4A2-3:3
CUST_143989_PI430048170	8.48e-05	1.63e-06	-3.33724	mRNA	NM_001270771	RefSeq	185585443	185956716	SORBS2	sorbin and SH3 domain containing 2%2C transcript variant 9		GGCTTCCAGGTAATTGACTTTGAATTCTTACAAGCAAAGGTCATTGTGTTTTTCTTGAAT	NM_001270771
CUST_100586_PI430048170	0.00377	0.000339	2.00118	ncRNA	lnc-SWAP70-3:1	lncipedia	9653673	9654504				GCAATCTTCTCTTGATCAGAAGAGCCACAAACTAGAGACAAGTTATTTGTGTCTCTTGCC		lnc-SWAP70-3:1
CUST_139601_PI430048170	8.5e-05	1.63e-06	-4.92787	mRNA	NM_001177800	RefSeq	186842673	186858463	ADIPOQ	adiponectin%2C C1Q and collagen domain containing%2C transcript variant 1		AAAGAGGCCTGAGAGAAACTGAGGTCAAGATTTCAGGATTAATGGTCCTGTGATGCTTTG	NM_001177800
CUST_41613_PI430048170	2.44e-05	2.3e-07	2.00115	ncRNA	ENST00000522875	ENSEMBL_GENCODE	127989261	128096656	PVT1		+	ATAAGCTCTTCACACCTGTACCCATATGGACTGTGGGAGAGTTTCTCTGATATGGACTGT		ENST00000522875
CUST_87505_PI430048170	3.35e-05	3.75e-07	1.99666	ncRNA	lnc-ZSCAN10-5:1	lncipedia	3068836	3072043				ATCCATCTCTTTCTTTTTCAAGTAGAGGAGTGAGCTCCTGTGGAATGGGAGCACCATTCA		lnc-ZSCAN10-5:1
CUST_110087_PI430048170	8.6e-05	1.66e-06	1.20492	mRNA	NM_144570	RefSeq	1678276	1702072	HN1L	hematological and neurological expressed 1-like		AATATTTTTGGACCAACAGAAGAACCTCAGAACATACCCAAGAGGACAAATCCCCCAGGG	NM_144570
CUST_10884_PI430048170	7.51e-05	1.36e-06	1.99177	ncRNA	ENST00000455380	ENSEMBL_GENCODE	54887728	54888850	RP11-67L3.4		-	TTACACAACAGCTATGAGCTACTGGTATGTGGCTAGTCCAAACTGAAATGCCCTTTAAGA		ENST00000455380
CUST_141825_PI430048170	8.61e-05	1.66e-06	-2.57582	mRNA	NM_002036	RefSeq	159204012	159206500	ACKR1	atypical chemokine receptor 1 (Duffy blood group)%2C transcript variant 2		TCCTAGTTCTCTTCCCACCTGTCAACCTGAATTAAAGTCTACACTGCCTTTGTGAAAAAA	NM_002036
CUST_35405_PI430048170	8.61e-05	1.66e-06	0.954345	ncRNA	ENST00000362874	ENSEMBL_GENCODE	133350456	133350528	SNORD36A		+	AATCTCTCACTGAATTCAACCTTGAAGTGCGAATCCATGAGCTTTTTAACCCTGAGCAAT		ENST00000362874
CUST_5810_PI430048170	8.62e-05	1.67e-06	-2.33484	ncRNA	NR_104261	RefSeq	206737764	206765549	MDH1B	malate dehydrogenase 1B%2C NAD (soluble)%2C transcript variant 3	-	CTCAGAACATCTCATGACCTAGTTAGGTTGTTGGTTATATTCTAAATCCAGCATGTTTTA	NR_104261
CUST_37984_PI430048170	0.0072	0.000808	1.9909	ncRNA	lnc-SPHKAP-1:1	lncipedia	227870082	227870644			+	ACCGTCTGCATGCACCACTTTTATATGCTAGCTGGCATCTGCCTTTCTATACAAAGTTAC		lnc-SPHKAP-1:1
CUST_145585_PI430048170	8.62e-05	1.67e-06	-5.45338	mRNA	NM_007281	RefSeq	173388147	173399466	SCRG1	stimulator of chondrogenesis 1		CACAAACTGCACTACATCAGTATAACTGCATTTCTAGTTTCTATATAGTGCAATAGAGCA	NM_007281
CUST_118960_PI430048170	8.63e-05	1.67e-06	-1.87521	ncRNA	lnc-SFTPA2-6:1	lncipedia	79404302	79406097			-	CAGAGCAGGAAACAGATAACTTAGGGAGTGGCTGTTCATGTGATTAAAATGTCTTTGCTT		lnc-SFTPA2-6:1
CUST_109603_PI430048170	8.63e-05	1.67e-06	-1.85121	ncRNA	lnc-TUBA1C-3:2	lncipedia	49189079	49190434			-	CCGGAGTAAGTCACTGGACTTCGTACCACTGGATGTTGGTGATGAAATTTCAGAGGTAAA		lnc-TUBA1C-3:2
CUST_46762_PI430048170	8.64e-05	1.68e-06	-0.533638	ncRNA	lnc-WHSC1L1-11:1	lncipedia	38417952	38418674			-	AAGAACATCAGATACACAGACATGTGCCTCTGCCATTGTTGGGAAGCCCTGACTAAGAAT		lnc-WHSC1L1-11:1
CUST_27650_PI430048170	8.66e-05	1.68e-06	-1.42883	ncRNA	ENST00000562992	ENSEMBL_GENCODE	30540093	30545969	AC026150.8			CCCAATAAGATGCTGAAAAGTGTCTGCCTACAAGGTTACAAGGTGGTGGAGACATTCTGA		ENST00000562992
CUST_80438_PI430048170	8.66e-05	1.68e-06	-0.512878	ncRNA	lnc-ZNF252-2:1	lncipedia	144944088	144950875			-	ACCACGGTGGCTCACGCCTGTAACCCAGCACCACGGTGGCTCACGCCTGTAACCCAGCAC		lnc-ZNF252-2:1
CUST_112131_PI430048170	8.71e-05	1.7e-06	0.803492	mRNA	NM_001256394	RefSeq	92297357	92325594	NOL8	nucleolar protein 8%2C transcript variant 2		CTCTATCCTGAGTAACTAATGGACATCTTCTCATGCAAGGTTTATATGAAGCCTTTTTAA	NM_001256394
CUST_105786_PI430048170	8.72e-05	1.7e-06	0.9294	ncRNA	lnc-FAM19A3-7:2	lncipedia	112857508	112858141				CCTTAGATGTGCATACTTCAGGCCCCGCAAAACTTTTATCTTCCGCTGACAGGGAATATA		lnc-FAM19A3-7:2
CUST_66389_PI430048170	0.00027	9.11e-06	1.99072	ncRNA	ENST00000603052	ENSEMBL_GENCODE	111266868	111267473	RP11-803D5.4			CAGAAGAGTCCAATTTAAAGCAAAGAGGTCCAGAGAAAAAAGCATTCTAGTGACATTTTT		ENST00000603052
CUST_140493_PI430048170	8.77e-05	1.71e-06	-3.33535	mRNA	NM_020134	RefSeq	26848100	26950351	DPYSL5	dihydropyrimidinase-like 5%2C transcript variant 1		AGCCCGACACGTTGTGTTCTGGTGCAGGTTTGTATTAAACTGTAGCTACTTCTCAAAAAA	NM_020134
CUST_145139_PI430048170	8.82e-05	1.72e-06	0.814485	mRNA	NM_017854	RefSeq	47045908	47048624	TMEM160	transmembrane protein 160		ATCTCCTTCATGCAGAGTGACATGGGTCGGGAAGCAGCATATGGCTTCTTCCTGCTGGGC	NM_017854
CUST_140591_PI430048170	8.85e-05	1.73e-06	-3.04871	mRNA	NM_001113561	RefSeq	64165843	64372869	RNF180	ring finger protein 180%2C transcript variant 1		TTTCGAAGAACATTAAAGTTCTACCAATGTAGAAGCATGAGGAATAAAAGATGGTCTGGA	NM_001113561
CUST_21592_PI430048170	8.85e-05	1.73e-06	-2.32782	ncRNA	ENST00000525376	ENSEMBL_GENCODE	144698614	144699185	AF186192.1		-	GGTTCCTAGCAAAATACTAAAGCTGAGCCAAAGTAGAAAACTTGAATTAACTAATTGCCA		ENST00000525376
CUST_24161_PI430048170	0.000114	2.62e-06	1.98525	ncRNA	ENST00000606980	ENSEMBL_GENCODE	76389648	76390128	RP11-111M22.4			CTTACCAAACTCTTAAGGTTTGCAAATGTGATTTTGTTGGCATCTAGAACCAGTGTATTT		ENST00000606980
CUST_142142_PI430048170	8.85e-05	1.73e-06	1.08918	mRNA	NM_181581	RefSeq	107563956	107578523	DUS4L	dihydrouridine synthase 4-like (S. cerevisiae)%2C transcript variant 1		GGTGGGCATGCACTGCAAGAATTAAGTATCTCAGACTGAAATAAAACCGTTCATAATTAA	NM_181581
CUST_132115_PI430048170	8.85e-05	1.73e-06	-2.26444	mRNA	NM_014548	RefSeq	51751560	51816361	TMOD2	tropomodulin 2 (neuronal)%2C transcript variant 1		AGGTGCAATTTTTAATCCTTTGAAATTAGCCAGCCAGACCTAATGCTAAGGTAAATGTAA	NM_014548
CUST_144913_PI430048170	8.88e-05	1.74e-06	-2.61037	mRNA	NM_021738	RefSeq	29457347	29634972	SVIL	supervillin%2C transcript variant 2		CGGTTGTAAACAGTACACATGTCATTTTGTGATATAGGACTCCCAAATAAAAGTATCAGA	NM_021738
CUST_44750_PI430048170	0.00731	0.000825	1.9827	ncRNA	NR_109859	RefSeq	3808493	3812434	LOC101929125	uncharacterized LOC101929125		ATTGTTCAAAGAAGACAGTTGATTATGGGACGGAAGAGCTCCAGGAGAAGAGAGCTAAGC	NR_109859
CUST_142834_PI430048170	8.9e-05	1.75e-06	-2.43906	mRNA	NM_152278	RefSeq	103330185	103332323	TCEAL7	transcription elongation factor A (SII)-like 7		CAATCGCCTTTGGAAGGCAATGAAACACTTAATAAACTCTCAATAACAGAAGCGTAAAAA	NM_152278
CUST_120717_PI430048170	8.93e-05	1.75e-06	0.82082	ncRNA	NONHSAT053107	NONCODE	35566516	35566672			+	GTAATAAAATCAGGTACAACTCCAAAAGGAGACATTGGAGAAGAACCAAGCTGGGTCTAT		NONHSAT053107
CUST_58234_PI430048170	8.96e-05	1.76e-06	-2.38749	mRNA	NM_001001522	RefSeq	117199323	117204792	TAGLN	transgelin%2C transcript variant 1		ACCAGCCCAGCCTGCCCCCTATCTTGTCCTGGAATATTTTTGGGGTTGGAACTCAAAAAA	NM_001001522
CUST_40569_PI430048170	8.97e-05	1.77e-06	-3.24066	ncRNA	lnc-PKN2-2:2	lncipedia	88463052	88464079				TTGGCGAAGTCCAGTTGAATCTACTTAACTCGACCAGCTTTAATCCAATCTAATAAACCA		lnc-PKN2-2:2
CUST_137348_PI430048170	8.97e-05	1.77e-06	-1.96631	mRNA	NM_016140	RefSeq	67389806	67393535	TPPP3	tubulin polymerization-promoting protein family member 3%2C transcript variant 1		CTGGCCAAGTGCCTAATTTTAACCCAGACCTCAATAAAGACACCTTTTGTACCAATAAAA	NM_016140
CUST_97706_PI430048170	7.96e-06	3.84e-08	1.97152	ncRNA	lnc-RNASEH2B-3:6	lncipedia	50401225	50409122				AATGCACTAATTGTCCTTTGGGTATGGATGAGGTAATGAAGGAAAGGGATGCTGGGAAGA		lnc-RNASEH2B-3:6
CUST_62603_PI430048170	8.97e-05	1.77e-06	1.25673	mRNA	NM_144570	RefSeq	1678276	1702072	HN1L	hematological and neurological expressed 1-like		TTGGATCAACAGCCCGCCAGCTGATTGGATGTCTAGGAATGACTGAAAGAAACCAAAACA	NM_144570
CUST_75031_PI430048170	8.97e-05	1.77e-06	-2.05515	ncRNA	ENST00000609153	ENSEMBL_GENCODE	173363780	173370446	RP11-798M19.6		+	CCATCGACGCAGAAAATCAAAGAATCAGCTTAAGTTCCAGAAAAAAGAAAAACCAACCAA		ENST00000609153
CUST_133113_PI430048170	8.97e-05	1.77e-06	0.847222	mRNA	NM_019613	RefSeq	82614561	82648535	WDR45B	WD repeat domain 45B		CCCCTCATTTGTAAGAATAGCTACACACTAACATTTTGGGAAGGAGAGGCACATAACTTT	NM_019613
CUST_92599_PI430048170	8.97e-05	1.78e-06	-1.33941	ncRNA	lnc-GPR162-2:1	lncipedia	6826649	6827421			+	CTACTCAGCTTCCATCACCCCTAGCAATATGTATTAAAGTCTGAAGTGTTGCCATGGAAA		lnc-GPR162-2:1
CUST_70303_PI430048170	8.97e-05	1.78e-06	-1.34909	mRNA	NM_005019	RefSeq	182140034	182522609	PDE1A	phosphodiesterase 1A%2C calmodulin-dependent%2C transcript variant 1		AGCTCCCCAACATATATATCTTGCAGTTTATATGCCTTTTCATTTAACCGAAACCTCTTT	NM_005019
CUST_47277_PI430048170	8.97e-05	1.78e-06	-1.5531	ncRNA	lnc-AC117834.1-3:4	lncipedia	92677499	92683446				TGCTGTCCTTTGTAATGAAAGACTACAGACTGCCATGAATAGTACCTTGGCTTCTTTTTT		lnc-AC117834.1-3:4
CUST_132221_PI430048170	8.98e-05	1.78e-06	-1.1167	mRNA	NM_014795	RefSeq	144384374	144520391	ZEB2	zinc finger E-box binding homeobox 2%2C transcript variant 1		GGGCCTCTGTTTCAGGGTTGAAGATGATATATTAATCTCGGAATTAAACAAATGCTATTA	NM_014795
CUST_136614_PI430048170	8.99e-05	1.78e-06	-2.6319	mRNA	NM_005407	RefSeq	21521080	21537216	SALL2	spalt-like transcription factor 2%2C transcript variant 1		GGACATGATGTAAGGGAAAAGGCCTCAAATTCTTGTGAATGTCTGGACATTCTCGTTAAT	NM_005407
CUST_89745_PI430048170	9e-05	1.79e-06	-3.30133	mRNA	NM_001270771	RefSeq	185585443	185956716	SORBS2	sorbin and SH3 domain containing 2%2C transcript variant 9		AAGAACCAAATTCTTTGGTACTTTCCCCGGAAACTACGTCAAGAGGCTGTGAATTGCGCT	NM_001270771
CUST_98646_PI430048170	9e-05	1.79e-06	0.90507	mRNA	NM_015004	RefSeq	44976248	45011470	EXOSC7	exosome component 7%2C transcript variant 1		TGTGTCGAAGTGGAAACTGATGTGGTGTCCAACACTAGTGGGTCCGCCAGGGTCAAGCTG	NM_015004
CUST_54063_PI430048170	9e-05	1.79e-06	-1.63652	mRNA	NM_003713	RefSeq	56494746	56579584	PPAP2B	phosphatidic acid phosphatase type 2B		GTCCTGGATGTGCAATTGGTTTAAGTGTTCATGTTCTAGTGAACACAGCTTGTTCAGGAA	NM_003713
CUST_95280_PI430048170	9.03e-05	1.8e-06	-2.51622	mRNA	NM_001099401	RefSeq	94585223	94656209	SGCE	sarcoglycan%2C epsilon%2C transcript variant 1		ACAGCAGACTACAGGTAAATGGTATCCCTGAAGAAAGAAAACTGACTGAAGCAATGAATT	NM_001099401
CUST_143313_PI430048170	9.05e-05	1.8e-06	-2.76442	mRNA	NM_152869	RefSeq	47078354	47093314	RGN	regucalcin%2C transcript variant 2		GTGGGTGGGTACATATCTCTTCTTGATTCTGCATTTCATACTTAACTATATTAAAGCTTC	NM_152869
CUST_59070_PI430048170	9.07e-05	1.81e-06	-2.736	mRNA	NM_001144996	RefSeq	55684569	55707902	ITGA7	integrin%2C alpha 7%2C transcript variant 1		TCTCCAGGGATGTGGATGGAACAACAGCCCTGTTTGCACTGAGTGGGCAGCCAGTCATTG	NM_001144996
CUST_113275_PI430048170	9.07e-05	1.81e-06	0.951841	ncRNA	lnc-TP53TG3-18:1	lncipedia	32356980	32363695				AGGAAAATGAATCCACAGCTCTATCTCAGGTTCTAGCCCAGCCTTCTACTAGTCAAAAGC		lnc-TP53TG3-18:1
CUST_19073_PI430048170	9.1e-05	1.82e-06	-1.00872	ncRNA	ENST00000430428	ENSEMBL_GENCODE	132085084	132099279	RP3-523C21.2			TAGCCAGGGCTTAAGGTTCCAGTTTCAAATTAAAGACAAAAGAAATCAGCAATACCAAAA		ENST00000430428
CUST_126145_PI430048170	0.000554	2.44e-05	1.96779	ncRNA	ENST00000457876	ENSEMBL_GENCODE	134544426	134545738	MIR503HG		-	TTGCAGTGTGCCTAGATTTTCCTCCAAGGACAAAAATGTGAATAAAGCAATATTTTAGCC		ENST00000457876
CUST_133278_PI430048170	9.14e-05	1.83e-06	1.46478	mRNA	NM_001137610	RefSeq	12425614	12436343	FAM86B2	family with sequence similarity 86%2C member B2		CAGCAGTTCTGGTTCTCAAGAAAATCATCATAAATCAGACATGAAAATTCTAGCTCCAAA	NM_001137610
CUST_96993_PI430048170	9.15e-05	1.83e-06	0.792446	ncRNA	lnc-MDN1-3:1	lncipedia	90116699	90117105			-	CTTAACCAAGAAGACTTATGTGGTAGCAGTTGATTGTAGACAAAGTGTGGACCTGGTCTT		lnc-MDN1-3:1
CUST_140991_PI430048170	9.15e-05	1.83e-06	0.931396	mRNA	NM_032026	RefSeq	124488494	124539088	TATDN1	TatD DNase domain containing 1%2C transcript variant 1		GCTTTGATTGACTTGGATCTTTATATAGGATTTAATGGTTGCTCACTGAAAACTGAAGCT	NM_032026
CUST_121117_PI430048170	9.16e-05	1.84e-06	0.607511	ncRNA	NONHSAT059953	NONCODE	76759684	76759866				AGATGAGATACTGCCCACCACCCCCATCTCAGAAGAGAAGATGGGAAGCCAGAGCCTCCT		NONHSAT059953
CUST_68381_PI430048170	9.16e-05	1.84e-06	0.854487	mRNA	NM_212550	RefSeq	45178744	45181800	BLOC1S3	biogenesis of lysosomal organelles complex-1%2C subunit 3		AAGAACGATATGATGTGTGGATTTCACTACATTTGGCTCCTGGATGCTATAAAAGGACTT	NM_212550
CUST_145392_PI430048170	9.18e-05	1.84e-06	-3.68601	mRNA	NM_001143942	RefSeq	17281577	17293868	RBM24	RNA binding motif protein 24%2C transcript variant 1		GCACTCTAAAGAAAGGAACTTTAGATGTGACACTGTAAAATTATGTATTCATCTCATGGC	NM_001143942
CUST_126150_PI430048170	9.18e-05	1.84e-06	0.644764	ncRNA	NONHSAT138751	NONCODE	137324971	137325049				AGCAGCCAGAAGCCTGTGATGGTGAAGAGGAAGCGGACCCACCCCACCAAGAGCTCCTGA		NONHSAT138751
CUST_136264_PI430048170	0.00288	0.000237	1.96474	ncRNA	NM_015432	RefSeq						CTTTGGTGTCTCAGAGAAGGAGTCTAGGTCTTTGATGTGTGATTTAATCTTTTATTTGTT	NM_015432
CUST_6917_PI430048170	2.57e-06	6.91e-09	1.95915	ncRNA	NR_003695	RefSeq	49280312	49280415	SNORD12B	small nucleolar RNA%2C C/D box 12B	+	GATCGACTATGTTGATCTAACTTTTCTAAGCCAGTTTCTGTCTGATATGCCAGCTTGAGC	NR_003695
CUST_132586_PI430048170	9.22e-05	1.86e-06	0.875258	mRNA	NM_025207	RefSeq	154983293	154993111	FLAD1	flavin adenine dinucleotide synthetase 1%2C transcript variant 1		TTTTCTGCGTCAGCTGTTTGTCCCATACTGTATCCTGTATGACCGAGGATACACATCACT	NM_025207
CUST_35396_PI430048170	2.18e-06	5.2e-09	1.95796	ncRNA	NR_003695	RefSeq	49280312	49280415	SNORD12B	small nucleolar RNA%2C C/D box 12B	+	CCGACAGATCGACTATGTTGATCTAACTTTTCTAAGCCAGTTTCTGTCTGATATGCCAGC	NR_003695
CUST_3452_PI430048170	9.22e-05	1.86e-06	1.17239	mRNA	NM_001199815	RefSeq	30496620	30504841	GGCT	gamma-glutamylcyclotransferase%2C transcript variant 2		TGAATGTGAGTACCCCTTCTGTGAACACTGAAAGCTATTCTCTTGAATTGATCTTAAGTG	NM_001199815
CUST_115803_PI430048170	9.22e-05	1.86e-06	-2.01703	ncRNA	lnc-DOCK6-1:3	lncipedia	11195622	11196227			-	TCCAGGCAAATGGAAAACGGAATTTCCTGCAATTGGTGACCATGTGTTCCAGGTGTTGAA		lnc-DOCK6-1:3
CUST_73711_PI430048170	9.22e-05	1.87e-06	-1.89514	ncRNA	lnc-NMD3-1:1	lncipedia	161074652	161078902				TTTGGGTCGCTTTGATGGGTGCTCGGGTAGAATTAGCCTTGTAGAGACTAATGTGTTCAT		lnc-NMD3-1:1
CUST_128980_PI430048170	9.22e-05	1.87e-06	-1.5778	mRNA	NM_001470	RefSeq	1088707	1119666	GABBR1	gamma-aminobutyric acid (GABA) B receptor%2C 1%2C transcript variant 1		AATTAAGGAAAAATAAGTGGGGGCAGGTTTGGAGAGCTGCTTCCAGTGGATAGTTGATGA	NM_001470
CUST_145704_PI430048170	9.22e-05	1.87e-06	-1.29988	mRNA	NM_147196	RefSeq	46701332	46710923	TMIE	transmembrane inner ear		ATTTGTGAATAAAGCTGATTGCCTTCTCAGAGCCAGGCCTAGAAAATGGCCTCCTGAGAT	NM_147196
CUST_132683_PI430048170	9.22e-05	1.87e-06	-2.76075	mRNA	NM_020211	RefSeq	93043405	93089214	RGMA	repulsive guidance molecule family member a%2C transcript variant 4		GGAGTGTCACCGCGTGTACATACTGTAAATTATTTATTAATGGCTAAATGCAAGTAAAGT	NM_020211
CUST_120754_PI430048170	9.22e-05	1.87e-06	0.625527	ncRNA	NONHSAT053806	NONCODE	43002709	43002957			+	TTCTGGAAGAACCACTTGTTCTTGCCTGTCTTGTACTCTCTTCAAACTTGACCTTGGCCT		NONHSAT053806
CUST_118723_PI430048170	9.22e-05	1.87e-06	-2.37365	mRNA	NM_001003665	RefSeq	226548799	226609214	C1orf95	chromosome 1 open reading frame 95		TGTGTGTGTCCTGAGTTTCCAGTGCAAGTCATCTGGATTTGCATTTAGCTAGGGAAACTC	NM_001003665
CUST_143111_PI430048170	9.22e-05	1.87e-06	-1.41658	mRNA	NM_015185	RefSeq	63634967	63755151	ARHGEF9	Cdc42 guanine nucleotide exchange factor (GEF) 9%2C transcript variant 1		GCAACAGTGACTTTGATTACCCTTGCTGCTCTGCATTTGCCAGTTTATTCTTTTGTTTCT	NM_015185
CUST_61065_PI430048170	0.0138	0.00193	1.95412	ncRNA	ENST00000557691	ENSEMBL_GENCODE	70810330	70815403	RP6-65G23.3			TTTCAGGAAAGAGAAAATTATTCCTATCATCGGGGTTTTTGAAGAACATGAAATGACTGG		ENST00000557691
CUST_118428_PI430048170	9.31e-05	1.89e-06	0.971969	ncRNA	NONHSAT004818	NONCODE	101025853	101087263			-	CTTCAGTCTTTATCAACTCTTTGGAGACTCAGCCATTCTTTTTTGTACTTTAGGGAATTA		NONHSAT004818
CUST_83440_PI430048170	0.00171	0.000116	1.95318	ncRNA	lnc-SLC16A13-1:1	lncipedia	7036096	7037064			+	CCCAGAAGGGAATTCTTAATAGGAATGACTAAAGCGACAAACATGGTGAGGAATTAGGAA		lnc-SLC16A13-1:1
CUST_104494_PI430048170	9.35e-05	1.9e-06	-3.68317	ncRNA	lnc-PLEKHA2-5:2	lncipedia	38728616	38745352				CATTCTGGGGAGTGAGGAGATCATGAATGCTGAAAATAAATGAAGGAATCCAGAAAAGCA		lnc-PLEKHA2-5:2
CUST_142192_PI430048170	9.4e-05	1.91e-06	-2.00878	mRNA	NM_002221	RefSeq	226631689	226739175	ITPKB	inositol-trisphosphate 3-kinase B		TGTTACAAACCCCTGCACAGTGCCTGTCAAACAGATGCAAACCTTCCTGAATAAAGCCTT	NM_002221
CUST_139115_PI430048170	9.41e-05	1.92e-06	-1.79129	mRNA	NM_005943	RefSeq	39904257	39927716	MOCS1	molybdenum cofactor synthesis 1%2C transcript variant 1		TAGCACCAGAGCCACTGGCCAGATGTAGAAAATAAATAGAAAAATATCTTTCTTTTAGAG	NM_005943
CUST_112061_PI430048170	9.41e-05	1.92e-06	0.752886	ncRNA	lnc-APTX-2:4	lncipedia	33019681	33020165				TGAAGACTGTTGCCTGCTCCGAATTTCCCTTATCAACTTTCTCGACCATCTTTCTCTGGT		lnc-APTX-2:4
CUST_77709_PI430048170	9.44e-05	1.93e-06	-3.48297	mRNA	NM_014702	RefSeq	127438405	127459390	KIAA0408	KIAA0408		CCTACATAAGCAGTGGGAGAACACAGAGACTAACTGGCATAAGGAAAAGATGGAATTACT	NM_014702
CUST_55340_PI430048170	9.44e-05	1.93e-06	-3.65842	ncRNA	ENST00000458139	ENSEMBL_GENCODE	201898100	201899978	RP11-307B6.3		-	AATTTGGAGAGCCTCAGAGACAAGAAAAGGAAAGTGAGAAGAGATAAGGCATCCTTCCTT		ENST00000458139
CUST_119000_PI430048170	9.44e-05	1.93e-06	-3.49614	ncRNA	lnc-RP11-476E15.3.1-1:1	lncipedia	95392508	95393238			-	GGGGAACTGGATTTATTTTGCATAGAGGCATAAACAGTAAGGGATGTCATGATAACTTAT		lnc-RP11-476E15.3.1-1:1
CUST_112522_PI430048170	0.00102	5.76e-05	1.95234	ncRNA	ENST00000578585	ENSEMBL_GENCODE	20788071	20789584	RP11-283C24.1		+	TCTCCAAAAAATTGAATGAATCCATTGGAGAAGCAGTGGATTAACTAGCCAGACAAAATT		ENST00000578585
CUST_90980_PI430048170	9.44e-05	1.93e-06	0.918675	ncRNA	lnc-AUH-8:1	lncipedia	91169584	91170045				TGAAAACTTCATCCCAAAGCATACAGGTCCTGTCATCTTTCCATGGCAAATGCTAGACCC		lnc-AUH-8:1
CUST_69663_PI430048170	9.47e-05	1.94e-06	-3.39757	mRNA	NM_001190839	RefSeq	14881180	14885919	MGP	matrix Gla protein%2C transcript variant 1		TTGCGAACGCTACGCCATGGTTTATGGATACAATGCTGCCTATAATCGCTACTTCAGGAA	NM_001190839
CUST_127197_PI430048170	9.47e-05	1.94e-06	1.76241	mRNA	NM_138779	RefSeq	102765887	102773821	TEX30	testis expressed 30%2C transcript variant 1		GGATAGGAGTGGACATATGTTTCAAATATGGGGACCCTGAAGATTTTTTAGAATGAAATA	NM_138779
CUST_131407_PI430048170	9.47e-05	1.94e-06	-3.01723	mRNA	NM_001001396	RefSeq	203626786	203744081	ATP2B4	ATPase%2C Ca++ transporting%2C plasma membrane 4%2C transcript variant 1		TGAACAGAAACCAATACTGCTGTGCACTGAGAATAAAAACTCATGCCCACTTGTAAAAAA	NM_001001396
CUST_138065_PI430048170	9.47e-05	1.94e-06	0.969969	mRNA	NM_015934	RefSeq	202265791	202303661	NOP58	NOP58 ribonucleoprotein		CTCTCTAACGTAATCAAGGGAAGGTTCAGTAAGACAAAGTGATTTATCATCTATAACTTC	NM_015934
CUST_69768_PI430048170	0.00874	0.00104	1.95225	ncRNA	lnc-TNNT2-3:2	lncipedia	201382283	201383208			-	AAAGTTCTCTTTTTAGGAGAACTTGAGGCTCTCAGGGGTTGTGACATCAAGGCTCAACCT		lnc-TNNT2-3:2
CUST_112451_PI430048170	9.51e-05	1.96e-06	0.929126	ncRNA	lnc-CLEC3A-9:1	lncipedia	77892421	77892915			+	ATGTGGTCTTTGACAAGGTGAAAGAAGGCATGAATATTGTGGAGGCCATGGAGTGCTTTG		lnc-CLEC3A-9:1
CUST_135153_PI430048170	9.51e-05	1.96e-06	0.870034	mRNA	NM_032242	RefSeq	126988593	127037392	PLXNA1	plexin A1		CCTCAGATGTGTACATATACGGCTATTTCCTATTTTACTGTTCTTCAGATTTAGTACTTG	NM_032242
CUST_129448_PI430048170	9.51e-05	1.96e-06	0.884829	mRNA	NM_001202560	RefSeq	73683567	73698221	WBSCR22	Williams Beuren syndrome chromosome region 22%2C transcript variant 1		GAGAGCATCTTATTTTGTTTAAAGGCAAGAAATAAAATTTCCTTTTGTGGAGCTCTGGCA	NM_001202560
CUST_82398_PI430048170	0.0489	0.0111	1.94983	ncRNA	lnc-RBMY1E-4:1	lncipedia	21430696	21437245			-	TACTCGAGATAGATATGGCAGAAGTCGGGAGAGTTACTCAAGGAGTTGCAGTGATTTTTA		lnc-RBMY1E-4:1
CUST_65154_PI430048170	9.57e-05	1.97e-06	-1.77706	ncRNA	lnc-VN1R4-3:1	lncipedia	53238596	53241803			-	AGTCCCTTTGTGTTGTTAAACGTTTAAAGACAGTTGAGAAGCTTCATAACTCTGTTCATT		lnc-VN1R4-3:1
CUST_126056_PI430048170	9.6e-05	1.98e-06	-1.29708	ncRNA	NONHSAT137667	NONCODE	75888699	75888888				CTACTGGTTATTCTTGAATTAAGCACAGACTCGTCAGCTCAGTAGCTTTATCATGAATAA		NONHSAT137667
CUST_78165_PI430048170	9.63e-05	1.99e-06	-2.87418	mRNA	NM_004080	RefSeq	14145048	14841450	DGKB	diacylglycerol kinase%2C beta 90kDa%2C transcript variant 1		ATGGACCAATGCCAGGGTTAAACTTTTTCCGTGATGTTCCTGACTTCAGAGTGTTAGCCT	NM_004080
CUST_55627_PI430048170	9.66e-05	2e-06	-1.9254	mRNA	NM_001003665	RefSeq	226548799	226609214	C1orf95	chromosome 1 open reading frame 95		GGCACAAGGACCTTTACATGTTCTTTTCTGCCATTTTCTGGACTGGGGGTGGAAAGGGGG	NM_001003665
CUST_16783_PI430048170	9.67e-05	2e-06	-2.5958	ncRNA	ENST00000503140	ENSEMBL_GENCODE	174097755	174120517	RP11-148L24.1			TGGCTTCACCTTTCTTATGAAAATGCAACCACTAGTACTCTTCCAATAAAAGCTTTTCTC		ENST00000503140
CUST_67091_PI430048170	0.000375	1.42e-05	1.94952	ncRNA	ENST00000568280	ENSEMBL_GENCODE	17380649	17383531	RP1-239B22.5			CAGAGATGACAAGGTTTCTCAGAGAATGCGTGAGTAACTGGAATGGCTTTTCCTGATGAC		ENST00000568280
CUST_140358_PI430048170	9.7e-05	2.01e-06	-3.35241	mRNA	NM_001190839	RefSeq	14881180	14885919	MGP	matrix Gla protein%2C transcript variant 1		ACCTGATTTTGTATCCCCCTGTAGCAGCATTACTGAAATACATAGGCTTATATACAATGC	NM_001190839
CUST_111435_PI430048170	9.71e-05	2.01e-06	-2.06061	mRNA	NM_022140	RefSeq	112162617	112419313	EPB41L4A	erythrocyte membrane protein band 4.1 like 4A		TACAGCCTGTGAGGAGGAGGAAAGCCCATAACAGTGGTGAAGATTCAGATCTTAAGCAAA	NM_022140
CUST_113793_PI430048170	9.71e-05	2.01e-06	-1.39204	ncRNA	lnc-ADHFE1-1:7	lncipedia	66473783	66505468			+	ATGTTCTAAAACTGCTCAGGCCTGTGAGTGAAATGATTTGCTGCACTGCAAGGGAGTATC		lnc-ADHFE1-1:7
CUST_145308_PI430048170	9.73e-05	2.02e-06	0.583198	mRNA	NM_001164262	RefSeq	144592867	144593652	PPIAL4F	peptidylprolyl isomerase A (cyclophilin A)-like 4F		CAATATCCTAGAATCTTTGTGCTCTTGCTGCAGTTCCCTTTGGGTTCCATGTTTTCCTTG	NM_001164262
CUST_17462_PI430048170	9.73e-05	2.02e-06	-1.67942	ncRNA	ENST00000515688	ENSEMBL_GENCODE	84384556	84417316	CTD-2269F5.1		-	GCAGTTTTTTGTTGTTGTTGATGATCTTCCTGTCATAGACAATGCTGTAACAAACAGACT		ENST00000515688
CUST_7905_PI430048170	9.73e-05	2.02e-06	-1.75172	ncRNA	NR_022011	RefSeq	24981993	24983790	PWARSN	Prader Willi/Angelman region RNA%2C SNRPN neighbor		GACACAGGACCTTGTCTGAACATAATGATTTCAAAATTTGAGCTTAAAAATGACACTCTG	NR_022011
CUST_95825_PI430048170	9.73e-05	2.02e-06	0.920784	mRNA	NM_017802	RefSeq	726700	786479	DNAAF5	dynein%2C axonemal%2C assembly factor 5%2C transcript variant 1		TTGCTGGTTCACCTTGACGATCCAGAGAGGGCCATCCAGGATGCAATTTTAGAGGTCCTC	NM_017802
CUST_27095_PI430048170	0.0226	0.00382	1.94253	ncRNA	ENST00000557691	ENSEMBL_GENCODE	70810330	70815403	RP6-65G23.3			TTCCTATCATCGGGGTTTTTGAAGAACATGAAATGACTGGGAAAATAATCATGTTAAGTG		ENST00000557691
CUST_77285_PI430048170	9.74e-05	2.03e-06	0.61494	ncRNA	lnc-KIAA0240-3:1	lncipedia	42887992	42889858			+	GTTTGTAATTTATTCTGTCAGAGCAAACTGCTGGTAAATAAAAGGGACTAAGTTGACGAA		lnc-KIAA0240-3:1
CUST_118749_PI430048170	9.74e-05	2.03e-06	-3.04754	ncRNA	lnc-GPR137B-4:1	lncipedia	236064359	236066479			-	AAGACAGGAAGAAAAAGCAAAGGAAACATGCCTTCTAAGCAAAACACTTTTGATTTACTC		lnc-GPR137B-4:1
CUST_94737_PI430048170	9.75e-05	2.03e-06	0.845686	ncRNA	lnc-NPFFR1-1:1	lncipedia	70217767	70218304			-	TGGTGCCATCCCTCAGGTATGTCTTCATGCAACTGCTGACAATGTACTTTTTAGCTTACT		lnc-NPFFR1-1:1
CUST_6475_PI430048170	9.75e-05	2.04e-06	-4.54033	ncRNA	NR_033263	RefSeq	62543069	62551561	C20orf166-AS1	C20orf166 antisense RNA 1	-	AGATTTATTTCACTTTTGGGACTGCAAGAGAATAAACTGTGACTTTTGTTACAGCAGCCA	NR_033263
CUST_46991_PI430048170	0.00765	0.000875	1.94185	ncRNA	lnc-LRRC10-1:2	lncipedia	69353168	69353656			+	ATTCTGGAGTTACACTCCACAACCTTGAACATACTGACGGACATCTCTGTTTTGACAACG		lnc-LRRC10-1:2
CUST_20741_PI430048170	0.00107	6.14e-05	1.94166	ncRNA	NR_121620	RefSeq	37406463	37493913	LINC01605	uncharacterized LOC100507420%2C transcript variant 1		TAAGAAGCCACAGCTTGTCAGGGAATCAGGCTGGAAAAATGTTATGAGACTGAGTAAGAC	NR_121620
CUST_93797_PI430048170	9.79e-05	2.05e-06	0.848804	mRNA	NM_019070	RefSeq	18919674	18928633	DDX49	DEAD (Asp-Glu-Ala-Asp) box polypeptide 49%2C transcript variant 1		TTTGACGAAAAGAAGGAGATCAACAAACGGAAGCAGCTGATCCTGGAGGGGAAGGACCCT	NM_019070
CUST_137495_PI430048170	9.79e-05	2.05e-06	3.65707	mRNA	NM_024037	RefSeq	25834005	25859458	AUNIP	aurora kinase A and ninein interacting protein%2C transcript variant 2		CCACAAGATAGGAGGGAATCCCCTTTGTAAAACTATGAATCCAAATAAATGTTTACAAAG	NM_024037
CUST_63596_PI430048170	9.79e-05	2.05e-06	1.37893	mRNA	NM_001282203	RefSeq	81902900	81911239	PCYT2	phosphate cytidylyltransferase 2%2C ethanolamine%2C transcript variant 5		CAACAGGTTGGAGTATGAGGCGCGAAACCAGAAGAAGGAAGCCAAGGAGCTGGCCTTCCT	NM_001282203
CUST_126496_PI430048170	9.8e-05	2.05e-06	-3.7993	mRNA	NM_001146312	RefSeq	12665889	12768948	MYOCD	myocardin%2C transcript variant 1		AGGGTCTGAGAACTGTCAGCCTTTTGCCATTCAAAAACATTTATGTCCAACCTGAAAAAA	NM_001146312
CUST_108362_PI430048170	9.81e-05	2.06e-06	-1.04143	ncRNA	lnc-GPC6-5:1	lncipedia	91725057	91756439			+	GCAGATGGACTTCCCTGCTGGAATGGAGAAGATATAGTAAAAAGGTATTTTATGTGGTCT		lnc-GPC6-5:1
CUST_143553_PI430048170	9.83e-05	2.06e-06	1.68487	mRNA	NM_000234	RefSeq	48115444	48170603	LIG1	ligase I%2C DNA%2C ATP-dependent%2C transcript variant 1		TTACTCCGGAGTCTGGGATTCATCCCGTCATTTCTTTCAATAAATAATTATTGGATAGCT	NM_000234
CUST_36918_PI430048170	0.0121	0.00163	1.94144	ncRNA	ENST00000580945	ENSEMBL_GENCODE	35860654	35860744	AC090692.1			TACTCGTCTCAGCAGATTGAGGAGAGCACCACAGTGGTCACCACACAGTCCACCGAGGTT		ENST00000580945
CUST_131218_PI430048170	9.87e-05	2.08e-06	-4.00648	mRNA	NM_004137	RefSeq	170378160	170389677	KCNMB1	potassium channel subfamily M regulatory beta subunit 1		GCAGCTCCCATTTCTAGAACACATTTACAGTATTACTATTTTCTAGGATATAAAGTGCCA	NM_004137
CUST_62490_PI430048170	9.9e-05	2.09e-06	-0.973176	mRNA	NM_001171894	RefSeq	99565927	99716424	MEF2A	myocyte enhancer factor 2A%2C transcript variant 5		CTAGAAGCTGAAATAACAGAAGCTGTGTACGATGCATTAGGGTATTGAAGAAAATTAACT	NM_001171894
CUST_86330_PI430048170	0.0104	0.00132	1.9405	ncRNA	lnc-GLYAT-1:1	lncipedia	58888787	58896741				AACATGAACAGTTTGTTTTAGAAAGGCCAGAATGGCTTTGATCGGAAGATCTTTTAGTGT		lnc-GLYAT-1:1
CUST_123517_PI430048170	9.9e-05	2.09e-06	-1.92895	ncRNA	NR_104031	RefSeq	88889307	88967279	MEF2C-AS1	MEF2C antisense RNA 1%2C transcript variant 1	-	GTGTACTCTTTATTACTCTGTTGGACCATGATGAGAGCAACTTATTGTATGGCTATTTAA	NR_104031
CUST_69199_PI430048170	0.00473	0.000459	1.9403	ncRNA	lnc-GCNT3-3:3	lncipedia	59439953	59446624			+	AACGCGTTTGTGAAGAAGACATTCTCTCTGGATGAAGCAACTACAGAAGTGCAGATTGGC		lnc-GCNT3-3:3
CUST_114106_PI430048170	9.93e-05	2.1e-06	1.20499	mRNA	NM_005402	RefSeq	39623552	39708124	RALA	v-ral simian leukemia viral oncogene homolog A (ras related)		GAGAAAGATGCTGCATTTTATAATCAAAGCCCAAACTCCTTTCTTATCTTGACCATACTA	NM_005402
CUST_25262_PI430048170	9.93e-05	2.1e-06	-2.87953	ncRNA	ENST00000545709	ENSEMBL_GENCODE	65281657	65286728	RP11-305O6.3		+	CAGTACATATGTAAGACTTAAGGCATTATTGAAAATAAGCCTGTGCTACATGGTAGAATC		ENST00000545709
CUST_74698_PI430048170	9.94e-05	2.1e-06	2.16092	mRNA	NM_016269	RefSeq	108047544	108168956	LEF1	lymphoid enhancer-binding factor 1%2C transcript variant 1		ATCTGCATCAGGTACAGGTCCAAGAATGACAGCTGCCTACATCTGAAACATGGTGGAAAA	NM_016269
CUST_95835_PI430048170	9.94e-05	2.1e-06	-1.36708	ncRNA	lnc-GHRHR-2:2	lncipedia	31086971	31103302			+	AACTTCAGTCTCCAGACATGGGAGGCAATGAGTCCAGCATCTACTTACAAATTTAAGCCC		lnc-GHRHR-2:2
CUST_76664_PI430048170	9.95e-05	2.11e-06	-0.673931	ncRNA	lnc-RIPK1-2:3	lncipedia	3064359	3065817				TTCTAAATCCGAGCACTCTTACCCATTCTAAAAAATAGCCGGGCGTGGTGGCAGATAGTA		lnc-RIPK1-2:3
CUST_135701_PI430048170	9.96e-05	2.11e-06	-1.35955	mRNA	NM_001178089	RefSeq	178941192	178966217	ZNF454	zinc finger protein 454%2C transcript variant 1		TTACTGAGGGTCAGGTTTCACAGTGTCATGGGGTTTGGGCATTTAAGAATGGCAAACACT	NM_001178089
CUST_110228_PI430048170	9.97e-05	2.12e-06	1.2448	mRNA	NM_001009905	RefSeq	51110	157631	B3GNTL1	UDP-GlcNAc:betaGal beta-1%2C3-N-acetylglucosaminyltransferase-like 1		ACAGTTCAAGGAGGAGGAGACCCCTATTACACAGGTTGGAATAAAATATTTAAATCTCGT	NM_001009905
CUST_5035_PI430048170	0.000108	2.37e-06	1.93822	ncRNA	NR_002734	RefSeq	66767396	66768005	PTTG3P	pituitary tumor-transforming 3%2C pseudogene	-	AAAGGCTTTGGGAACTGTCAACAGAGCTACAGAAAAGTCAGTAAAGACCAATGGACCCCT	NR_002734
CUST_95893_PI430048170	9.98e-05	2.12e-06	-1.80033	mRNA	NM_006765	RefSeq	15540086	15766649	TUSC3	tumor suppressor candidate 3%2C transcript variant 1		TACAAAGGAAATATCAAAGTGTTTTTCAAGCCTGTTATATTCAGTGTGTGCCACAGGATT	NM_006765
CUST_57337_PI430048170	0.0152	0.00222	1.93707	ncRNA	lnc-BBOX1-2:1	lncipedia	27217033	27218768				CATAGTTCTAAGAGGAGCCATCTAAAAGCAGGCAGAGTTTGAAAGAAACTTCCAATTAAA		lnc-BBOX1-2:1
CUST_136758_PI430048170	9.99e-05	2.12e-06	-0.840767	mRNA	NM_001199771	RefSeq	55720366	55724742	RDH5	retinol dehydrogenase 5 (11-cis/9-cis)%2C transcript variant 1		GAAATGTGCCCAGTGGAAGGCTGACCCCATTTAAGTGCCAACTACTCCAAACCGAAAAAA	NM_001199771
CUST_79572_PI430048170	9.99e-05	2.13e-06	-1.86899	mRNA	NM_006765	RefSeq	15540086	15766649	TUSC3	tumor suppressor candidate 3%2C transcript variant 1		CCAAGTGGGATTTGCATAAAGTGAATGTTTACCATGAAGATAAACTGTTCCTGACTTTAT	NM_006765
CUST_64703_PI430048170	0.000101	2.15e-06	-1.83393	ncRNA	lnc-HSPB6-2:1	lncipedia	35754525	35755307			-	TTAGTCTTTCCCAGGCTTACTCTCCCAATAAATGTGCTAGAGCTCTGCCAACTGCTTTGT		lnc-HSPB6-2:1
CUST_100130_PI430048170	9.75e-05	2.04e-06	1.93499	ncRNA	lnc-RUNDC3B-3:2	lncipedia	87876582	87885183			+	CCAGCCATGATGGAAGTTCATTTAAGTCACCAGACACAGTAAGTCTCTTAAATATGCTTT		lnc-RUNDC3B-3:2
CUST_121618_PI430048170	0.000101	2.15e-06	0.851553	ncRNA	lnc-RGPD1-1:1	lncipedia	87161956	87172955			+	TATTTGTCTGCACCTAATGCTTCTGTTACAGGTCCTCATAACCTAGAAACTTGTCTGAGC		lnc-RGPD1-1:1
CUST_6725_PI430048170	0.000101	2.16e-06	0.929544	ncRNA	NR_024127	RefSeq	28578537	28581854	SNHG12	small nucleolar RNA host gene 12	+	AAACAACAGCATGCTAATGCAAAAAATTATGCAGTGTGCTACTGAACTTCAGAGGTGATC	NR_024127
CUST_35977_PI430048170	0.000101	2.16e-06	0.819084	ncRNA	ENST00000391061	ENSEMBL_GENCODE	74882656	74882783	SNORA40			CTTTTGCAACCCAGAACTCATTGTTCAGTGTGAGTTTTGATACATATAAGAAGGGATATT		ENST00000391061
CUST_89014_PI430048170	0.00378	0.00034	1.93461	ncRNA	lnc-CDC6-1:1	lncipedia	40303204	40304657			+	GAGTGTTGGGTGTTGCCATGGAAAGAGCATAGACAAAATAAATTGTGTGTTTCAACCCCA		lnc-CDC6-1:1
CUST_9684_PI430048170	0.000101	2.17e-06	-1.225	ncRNA	NR_106838	RefSeq	42708083	42708151	MIR6780A	microRNA 6780a	-	GGAGGGAAGACAGCTGGAGAGTATGGTCACAGCAGCATCCTCCTCTGTTTTCTTTCCTAG	NR_106838
CUST_69612_PI430048170	0.0031	0.000262	1.93449	ncRNA	ENST00000603308	ENSEMBL_GENCODE	15796959	15798346	LL22NC03-N64E9.1			CCCAATAAAATTGGTCGTTCTTGGTTTTTTATTTGGAGAGTCTGTGCAAAATGTCACTAA		ENST00000603308
CUST_4659_PI430048170	0.000102	2.18e-06	0.72987	ncRNA	NR_036506	RefSeq	15154721	15155347	PPIAP30	peptidylprolyl isomerase A (cyclophilin A) pseudogene 30	-	TTGACTTGTGTTTTATCTTAACCACCAGACCATTCCTTTTGTAGCTCAGAAGAACACCCT	NR_036506
CUST_97521_PI430048170	0.000102	2.19e-06	-1.54185	ncRNA	NR_110723	RefSeq	37497160	37507087	ZNF793-AS1	ZNF793 antisense RNA 1 (head to head)	-	ACTAGATGCCATTCTCAGATTCCACGCATATGGCCAAGGGTCCAGGAAATAAGAAGAAAC	NR_110723
CUST_34827_PI430048170	0.000102	2.2e-06	-3.16271	ncRNA	ENST00000424251	ENSEMBL_GENCODE	28942050	28942568	RP1-146A15.1		+	TTCCTCAGTCTTTTGACTTATTTCACATGGAATCCTAACATACGTGGTTGTCTGTTTTTC		ENST00000424251
CUST_144014_PI430048170	0.000103	2.2e-06	2.64935	mRNA	NM_003227	RefSeq	100620415	100641550	TFR2	transferrin receptor 2%2C transcript variant 1		GTGGTGAAAGGGGCGTGGAGTTTCAATATCAATAAACCACCTGATATCAATAAGCCAAAA	NM_003227
CUST_130307_PI430048170	0.000103	2.21e-06	0.67543	mRNA	NM_177983	RefSeq	27381198	27409683	PPM1G	protein phosphatase%2C Mg2+/Mn2+ dependent%2C 1G		GCTTGCACCCGCTCTCTGTTGTACACTTTCAATCAACACTTTTTCAGACTAAAGGCCAAA	NM_177983
CUST_81663_PI430048170	0.000185	5.33e-06	1.93435	ncRNA	lnc-MED14-7:1	lncipedia	41660100	41665832			-	CTGCCAACATGTGTTCCAAAGATATGCAACATCAACAACTGAAGTAATACCATGTTATAA		lnc-MED14-7:1
CUST_116492_PI430048170	0.000103	2.22e-06	0.904613	mRNA	NM_002519	RefSeq	108157390	108222638	NPAT	nuclear protein%2C ataxia-telangiectasia locus		CGTTTGCAGAAATGTAAGTAAAGCCAATCTGCAAAACTGTATAGCTTTGACAATTCCATA	NM_002519
CUST_80749_PI430048170	3.68e-05	4.47e-07	1.93359	ncRNA	NR_046175	RefSeq	65863791	65878507	LOC286297	uncharacterized LOC286297		CTGTCTCACCAACCTGACAAAAAAGGTGTGCCAAGGGACTTCATCTTACCTATCAGTGAT	NR_046175
CUST_142626_PI430048170	0.000103	2.22e-06	1.48368	mRNA	NM_177533	RefSeq	105172936	105181323	NUDT14	nudix (nucleoside diphosphate linked moiety X)-type motif 14		TGGGACTGACTGGCTCCAGACAGACCATGTTCTACACAGAGGTGACAGATGCCCAGCGTA	NM_177533
CUST_65416_PI430048170	0.000103	2.22e-06	0.84529	ncRNA	lnc-ID2-3:1	lncipedia	8603081	8603359			+	ACTGGGTCGGCTCATGCTAAAAGGAGATAATATTCCTCTGCTGCAAAGTGTCTCCAACTA		lnc-ID2-3:1
CUST_11735_PI430048170	0.000103	2.23e-06	-1.55179	ncRNA	NR_125960	RefSeq	173417788	173461362	LOC101928673	uncharacterized LOC101928673		TGACAAGCAAGTGCTTTTCTCCAGGGAAGACGTTCAGGTTCATTCATAGATCCATTGGTG	NR_125960
CUST_78711_PI430048170	0.000103	2.23e-06	-2.62127	ncRNA	lnc-HSPB1-3:1	lncipedia	76265406	76269992			+	GTGGGAACCTTTCCTCTTAATGCAGAGATGGCTTTTGAATTTTAAGTGAACATTAATCAT		lnc-HSPB1-3:1
CUST_36604_PI430048170	0.0122	0.00164	1.93211	ncRNA	ENST00000390147	ENSEMBL_GENCODE	203764707	203764798	AC125238.1			TAAGTACTGGTCTCAGCAGATTGAGGAGAGCACCACAGTGGTCACCACCCAGTCCGCTGA		ENST00000390147
CUST_123479_PI430048170	0.000104	2.24e-06	0.90336	mRNA	NM_001292004	RefSeq	74640022	74721288	HEXB	hexosaminidase B (beta polypeptide)%2C transcript variant 2		CATGTTTATACACCAAATGATGTCCGTATGGTGATTGAATATGCCAGATTACGAGGAATT	NM_001292004
CUST_41271_PI430048170	0.00104	5.91e-05	1.93177	ncRNA	ENST00000578585	ENSEMBL_GENCODE	20788071	20789584	RP11-283C24.1		+	TTGTTAGGGCTGCTTTTAAGTGCCCACATTTGATGGAGGGTGGAAGTAATTTGAATGTAT		ENST00000578585
CUST_92043_PI430048170	0.000634	2.97e-05	1.93117	ncRNA	lnc-EEPD1-3:1	lncipedia	36403492	36407842			+	GCATCTAGTGACAATGGCAAAACCAACTTCAGGGCAGTGGTATAGGCAGAAGATGACATT		lnc-EEPD1-3:1
CUST_141348_PI430048170	0.000104	2.26e-06	-2.89825	mRNA	NM_006366	RefSeq	17393504	17557792	CAP2	CAP%2C adenylate cyclase-associated protein%2C 2 (yeast)		CCAGTACAAGCATATATATTGTGCCTCTTACAGCCTTTGGAATACATTGTTTCCATTTTT	NM_006366
CUST_80613_PI430048170	0.000105	2.27e-06	0.608783	ncRNA	NR_003667	RefSeq	33500755	33511166	SUGT1P1	SUGT1 pseudogene 1		TGCAGATGCTAATTTCAGTGACTGGATTAAAAGGTGTCAAGAAGCTCAGAATGCTCAGAA	NR_003667
Human-PGK1_5	0.000105	2.28e-06	1.04759											CONTROL
CUST_62985_PI430048170	0.000105	2.28e-06	-1.42846	ncRNA	lnc-AOC3-2:3	lncipedia	42868749	42874246			+	TGACTGTGGGGAACAGCGTGGGCTTCTTCCTCCGACCCTACAACTTCTTTGACGAAGACC		lnc-AOC3-2:3
CUST_36957_PI430048170	0.012	0.0016	1.93064	ncRNA	ENST00000582499	ENSEMBL_GENCODE	97700234	97700325	AL445531.1			AAATACTGGTCTCAGCAGATTGAGGAGAGCACCTCAGTGGTCACCACGCAGTCCACCGAG		ENST00000582499
CUST_102426_PI430048170	0.000105	2.28e-06	0.917578	mRNA	NM_005646	RefSeq	234391312	234479103	TARBP1	TAR (HIV-1) RNA binding protein 1		GGATTTTCCAGGCTGGTTTCACCAACAATCAAGCATCCATAAAATATTTTATAGAATGGA	NM_005646
CUST_138593_PI430048170	0.000105	2.28e-06	2.37477	mRNA	NM_017915	RefSeq	102120177	102197520	PARPBP	PARP1 binding protein		CGTCAGTCGTCCTAATGCATATTGTGACTGTTTGCATATACTTCTGTTTATAAAAGTATC	NM_017915
CUST_66158_PI430048170	0.000105	2.28e-06	-0.733467	ncRNA	lnc-AC110080.1-12:1	lncipedia	89309897	89310144				GGTGGAGGCTGAGGATATTCGACTTTATTAATACATGCAAGCTACATAATATCCTTGCAC		lnc-AC110080.1-12:1
CUST_110511_PI430048170	0.000105	2.29e-06	-1.015	ncRNA	NR_111929	RefSeq	24076873	24169638	FAM228B	family with sequence similarity 228%2C member B%2C transcript variant 3	-	CTGGGAGCCAGCTGTGACCAGAGGAATAGCTCCAGCCATCCGGTTAAAAGTTTAACAACC	NR_111929
CUST_108577_PI430048170	0.0139	0.00197	1.92807	ncRNA	ENST00000438702	ENSEMBL_GENCODE	44347552	44355185	RP5-881L22.5		+	AACTTGTTGGATTTCAGCCCCTTGAAGCACATGTTGCTATTGCAGCTGCCTTGATAACTG		ENST00000438702
CUST_97105_PI430048170	0.000105	2.3e-06	-2.33739	ncRNA	lnc-ACOT12-5:4	lncipedia	81636471	81751016			-	CTGGCTTGATGATGCATTTCAATAGGCCTGTACTATACCTGTTTATGATTTCATGCTTCC		lnc-ACOT12-5:4
CUST_36551_PI430048170	0.0126	0.00173	1.92497	ncRNA	ENST00000385114	ENSEMBL_GENCODE	135371590	135371681	AC108867.1			ATTGAAGAGAGCACCACAGTGGTCACCACGCAGTCCGCTGAGGTTGGAGCTGTTGAGATG		ENST00000385114
CUST_121384_PI430048170	0.000105	2.3e-06	0.855096	ncRNA	NR_003699	RefSeq	53365714	53386588	ZNF525	zinc finger protein 525	+	AATAAAATCAGGTACGACTCCAAAAGGAGACATTGGAGAAGAACCAAGCTGGGTCTATAA	NR_003699
CUST_95015_PI430048170	0.000105	2.3e-06	-1.4979	ncRNA	lnc-EPAS1-3:7	lncipedia	45697981	45770860			+	CATGTGGAGACAATGAGCTCCTTAACCAAGGGTGAAAAAGACCAACCAAATCAAAACAAA		lnc-EPAS1-3:7
CUST_145194_PI430048170	0.000106	2.31e-06	0.94931	mRNA	NM_000097	RefSeq	98579445	98593611	CPOX	coproporphyrinogen oxidase		GGCCTTTTTGGGGCTGGAAAATGTATGAATTCTTCAACTGTCTTACAAGAGATCTGCTAA	NM_000097
CUST_105067_PI430048170	0.000106	2.31e-06	0.83282	ncRNA	lnc-SPAG9-3:1	lncipedia	51225182	51256829			-	TCAGCAAGCTACCTCTCTGAACTGCGATCTTAGACTGAACATTCTTCACGATCTGAAAGG		lnc-SPAG9-3:1
CUST_118408_PI430048170	0.000106	2.32e-06	0.819851	ncRNA	NONHSAT004508	NONCODE	93278960	93279129			+	CAAAATTGTCCCATTCCCCAGTGGATTCAGATGAAAACTGGTAATAAAATCAGGATTTTA		NONHSAT004508
CUST_74488_PI430048170	0.033	0.00636	1.92144	ncRNA	lnc-EREG-1:1	lncipedia	74448638	74450532			+	TTGAGAGACTCTTGTCAATAAATCTTTTCTTTTTTAGTTGAACAGGTAGTTAAGCCCCCC		lnc-EREG-1:1
CUST_57818_PI430048170	0.0158	0.00234	1.92129	ncRNA	lnc-CPT1A-3:1	lncipedia	68707441	68710606			-	CAGCAGGTAAAATGAATTCTTAAGTTGACGCTTTTGGTTCTGTTGTAAAGCAAAGATGAA		lnc-CPT1A-3:1
CUST_95321_PI430048170	0.000107	2.34e-06	0.73043	mRNA	NM_002766	RefSeq	76310786	76354149	PRPSAP1	phosphoribosyl pyrophosphate synthetase-associated protein 1		AAATTACAGAAATGCAGTCATTGTAGCTAAGTCTCCTGATGCTGCAAAGAGGGCCCAGTC	NM_002766
CUST_106527_PI430048170	0.000107	2.34e-06	1.3005	mRNA	NM_000190	RefSeq	119084876	119093549	HMBS	hydroxymethylbilane synthase%2C transcript variant 1		ATTGGAGAGAAAAGCCTGTTTACCAAGGAGCTTGAACATGCCCTGGAGAAGAATGAAGTG	NM_000190
CUST_85995_PI430048170	0.00181	0.000125	1.92103	ncRNA	lnc-HIST1H2BJ-5:1	lncipedia	27100386	27128083			-	GTAATTGTTGAAGCCTGTGCGACGAGACTTGGGAAGTGCAGGATTCTCTATATTTTTGTG		lnc-HIST1H2BJ-5:1
CUST_254_PI430048170	0.00331	0.000285	1.91978	ncRNA	NR_033928	RefSeq	23225220	23230926	LOC389641	uncharacterized LOC389641		TGAGTCAGCTGTCGTTCATATCTTTGTTACCTGTGAATGCACAAAATTTGCTCTGTATGA	NR_033928
CUST_76330_PI430048170	0.000108	2.37e-06	1.23109	mRNA	NM_213647	RefSeq	177086871	177098142	FGFR4	fibroblast growth factor receptor 4%2C transcript variant 3		AAGAACATCATCAACCTGCTTGGTGTCTGCACCCAGGAAGGGCCCCTGTACGTGATCGTG	NM_213647
CUST_79138_PI430048170	0.0037	0.000331	1.91866	ncRNA	lnc-TNPO3-6:3	lncipedia	128868570	128869523			+	TACGGAAAAAGCAAGAGGGCAACTTGCAGGTCTGATAGTTTCAGAAAGGCCTGAATGCAA		lnc-TNPO3-6:3
CUST_34057_PI430048170	0.000108	2.38e-06	-0.765258	mRNA	NM_001271441	RefSeq	44328943	44339402	C21orf2	chromosome 21 open reading frame 2%2C transcript variant 3		TGTCTGCCTCCTTGGGACTGTGGAGTGGGTGCCCTCAGTAAAGCGCTTTGTTGGAATGGT	NM_001271441
CUST_99070_PI430048170	0.000108	2.38e-06	0.534161	ncRNA	lnc-TSGA13-1:1	lncipedia	130645224	130645594			-	TATTTTGTGGCCCCCCAGGTAATATCTCTTTGCCAAAGCTGGATGAACAAGAGCCTTTCT		lnc-TSGA13-1:1
CUST_32852_PI430048170	0.000108	2.39e-06	-0.625531	ncRNA	ENST00000422045	ENSEMBL_GENCODE	53864763	53866140	AC008440.10		+	AAAGAGGGTCTGTGTCCCCTTCCCTTTGCAGAAGCACATCAAGCCCGCACACAGGCTCTA		ENST00000422045
CUST_122742_PI430048170	0.000108	2.39e-06	-1.52869	mRNA	NM_001164343	RefSeq	114314499	115071414	ZBTB20	zinc finger and BTB domain containing 20%2C transcript variant 3		TTTCACTTTCCGAGGTATTGTACAAGTTCACACTGTTTGTGAAGTTTGAATATGAAGGAA	NM_001164343
CUST_48278_PI430048170	0.000108	2.39e-06	-2.97975	ncRNA	lnc-CBLB-7:27	lncipedia	106809838	106913271				CAAACAAAAGAAGAGATTGCCTTAGGGAAGGGGACTACAGTGAACACTGAGAACTTCTTC		lnc-CBLB-7:27
CUST_7861_PI430048170	0.000567	2.53e-05	1.9164	ncRNA	NR_002583	RefSeq	40832655	40832735	SNORD72	small nucleolar RNA%2C C/D box 72	-	TAAAAATAAATGTCTGAACATATGAATGCAGTATTGATTTCAGCATTTAACTGAGATAAG	NR_002583
CUST_66333_PI430048170	0.000109	2.41e-06	-2.72869	ncRNA	lnc-MRPS9-4:1	lncipedia	104857581	104858574			+	GCTGTGGATGTGATTATATAATACTGCCATTTCCAAGCAGTGTTTTTGGTAGGTTTTAAT		lnc-MRPS9-4:1
CUST_136781_PI430048170	0.000109	2.42e-06	1.0589	mRNA	NM_177439	RefSeq	48476020	48486364	FTSJ1	FtsJ RNA methyltransferase homolog 1 (E. coli)%2C transcript variant 3		TCTTACCTCTTCTTTAAACCTCTTCAGGAGTGTCCTGATTATGTCCAGAATTTTCCCTAA	NM_177439
CUST_17991_PI430048170	0.000109	2.43e-06	-2.92694	ncRNA	ENST00000602964	ENSEMBL_GENCODE	149406879	149428678	MIR143HG		+	AAAGTCCAGGAAAGGGCACAGGGGCTTTCGCAACGACCGTGGCGATGATAGCTTTGACGT		ENST00000602964
CUST_104602_PI430048170	0.000109	2.43e-06	-2.68556	mRNA	NM_001174064	RefSeq	38411137	38468834	FGFR1	fibroblast growth factor receptor 1%2C transcript variant 11		AGGGGGCACCTACCTAGGAATAGCCACGGGGTAGAGCTACAGTGATTAAGAGGAAAGCAA	NM_001174064
CUST_78375_PI430048170	0.00553	0.000567	1.91568	ncRNA	lnc-ELMO1-1:1	lncipedia	36623189	36661300			-	AAGTGGTCATGTGAGCTGGGAAGAAACCCAAAGAAAGTCTCTTCTAGACTCCATCACTGT		lnc-ELMO1-1:1
CUST_128918_PI430048170	0.00011	2.43e-06	1.25336	mRNA	NM_001009905	RefSeq	51110	157631	B3GNTL1	UDP-GlcNAc:betaGal beta-1%2C3-N-acetylglucosaminyltransferase-like 1		TCAAGGAGGAGGAGACCCCTATTACACAGGTTGGAATAAAATATTTAAATCTCGTAAAAA	NM_001009905
Rat-PGK1_5	0.00011	2.44e-06	1.11551											CONTROL
CUST_92828_PI430048170	0.00011	2.44e-06	2.85392	mRNA	NM_152515	RefSeq	112736350	112764677	CKAP2L	cytoskeleton associated protein 2-like%2C transcript variant 1		CTTTCTAAAAGAAACAAACAAAGAGAACTTGCTCGATATCTTAACAGAACCTGAGAGGAA	NM_152515
CUST_98144_PI430048170	0.00027	9.14e-06	1.91489	ncRNA	lnc-RNF17-2:1	lncipedia	24943574	24944498				CACTCTTTTTGGCCTACGAATATAGCAGGAATTTGATGATGAGCCAGTTGGAAGCATACT		lnc-RNF17-2:1
CUST_144024_PI430048170	0.000111	2.48e-06	1.62449	mRNA	NM_144779	RefSeq	35154768	35169885	FXYD5	FXYD domain containing ion transport regulator 5%2C transcript variant 1		ACGTTGAAAGATACCACGTCCAGTTCTTCAGCAGACTCAACTATCATGGACATTCAGGTC	NM_144779
CUST_64432_PI430048170	0.000111	2.48e-06	0.750028	ncRNA	lnc-TECR-1:8	lncipedia	14564251	14565921			+	TAGGCTGATCCTGCTTCTCTGACAGATCTGCCAGCTCGGCAACTTCTCCATCCACATGGC		lnc-TECR-1:8
CUST_82958_PI430048170	0.000111	2.48e-06	-2.09521	mRNA	NM_001130487	RefSeq	58464089	58513619	NDRG4	NDRG family member 4%2C transcript variant 2		GGTGGCTGCTGTCATGAGATGATAAAATGTAAAACAAAACTCTAGTCAACGTAGAAAGAG	NM_001130487
CUST_128407_PI430048170	0.000111	2.49e-06	-2.38418	mRNA	NM_002507	RefSeq	49495292	49515020	NGFR	nerve growth factor receptor		GCCCTCCTGAAACTTACACACAAAACGTTAAGTGATGAACATTAAATAGCAAAGAAAGAA	NM_002507
CUST_137633_PI430048170	0.000111	2.49e-06	-1.96857	mRNA	NM_001105579	RefSeq	74405892	74426102	SYNDIG1L	synapse differentiation inducing 1-like		CCTGCATCACAGCAGTTTTAAGGTCCCATTATTGTACTGATTTATCCTTGTAATAAATGT	NM_001105579
CUST_55387_PI430048170	0.000111	2.49e-06	-1.5309	ncRNA	lnc-CNTN2-6:1	lncipedia	204870603	204945032			+	CCAGGCATGGATTCCTTCTCATTGTTTTCAACTTTCCTGCAGTAAAGATAAAAAGTAAAA		lnc-CNTN2-6:1
CUST_22289_PI430048170	0.000111	2.49e-06	-2.19397	ncRNA	ENST00000476274	ENSEMBL_GENCODE	127867864	127886787	RP11-203J24.9		-	TTCTCATCGTGGGCCCAGCTGAATAAACACACCTACGCTCCGGCTTCGTGTCCTGTGTCA		ENST00000476274
CUST_83988_PI430048170	0.000111	2.49e-06	-2.14663	ncRNA	NR_109940	RefSeq	88889307	88941370	MEF2C-AS1	MEF2C antisense RNA 1%2C transcript variant 2	-	AGTGTAAGCATTGATATCTGGAATATCTGGGAAAATGTACAATAAAGACATCTCTTCTGG	NR_109940
CUST_88277_PI430048170	0.000111	2.49e-06	-1.60828	ncRNA	ENST00000608023	ENSEMBL_GENCODE	207801518	207869150	C1orf132		-	GGAGACAGCCGTCATACTGCCGGATAGAGTGGCTCACTTGCATGTATTTGGAACAAAAAA		ENST00000608023
CUST_69544_PI430048170	0.000112	2.5e-06	0.813321	ncRNA	lnc-EME2-1:1	lncipedia	1771854	1772516			-	TGTCTCCATTTTTCTGTCGTTCTGCGATAATCATGGCCCGGAGGAGAGGCGGGTACGGCA		lnc-EME2-1:1
CUST_125514_PI430048170	0.000112	2.5e-06	0.9219	ncRNA	NONHSAT128057	NONCODE	101337495	101337649				GGTAATAAAATCAGGTACAACTCCAAAAGGAGGCATTGGAGAAGAAGCAAGCTGGGTCTA		NONHSAT128057
CUST_128656_PI430048170	0.000112	2.51e-06	-1.12676	mRNA	NM_006338	RefSeq	204617172	204685353	LRRN2	leucine rich repeat neuronal 2%2C transcript variant 1		GCAATTTTGTACCTTTGTGGAGAAATGTGTCACCTCCCCCAACCCGATTCACTCTTTTCT	NM_006338
CUST_98216_PI430048170	0.000112	2.51e-06	-0.65286	mRNA	NM_004545	RefSeq	92116123	92121809	NDUFB1	NADH dehydrogenase (ubiquinone) 1 beta subcomplex%2C 1%2C 7kDa		TTACCTGGAAGTAAAGACTGGCTAGATTATCGAATGTTCACATTTTAAAGTTCTGAGAGA	NM_004545
CUST_70125_PI430048170	0.000112	2.51e-06	0.852728	mRNA	NM_001304464	RefSeq	203861584	203871152	SNRPE	small nuclear ribonucleoprotein polypeptide E%2C transcript variant 2		GCTGTATCATTGGTTTTGATGAGTATATGAACCTTGTATTAGATGATGCAGAAGAGATTC	NM_001304464
CUST_127134_PI430048170	0.000112	2.52e-06	0.782396	mRNA	NM_001199196	RefSeq	19033577	19058178	ARMC6	armadillo repeat containing 6%2C transcript variant 1		GGTCCTGGGCCAGCCAGGATACCTGATAATAAAAGATCATTGGGTGAACAGCGGAAAAAA	NM_001199196
CUST_16772_PI430048170	0.000112	2.52e-06	-2.69268	ncRNA	ENST00000514431	ENSEMBL_GENCODE	173530515	173583169	HAND2-AS1		+	GCCATGATACTGCCTGCACTGAAGCTGCTCCTATTTCTGAAATATGTATTGTTATTTTTT		ENST00000514431
CUST_89576_PI430048170	0.000112	2.52e-06	0.770373	ncRNA	lnc-AMOTL2-3:1	lncipedia	134351851	134356561			-	GGCACACATATTTATGCTGTCTAAAGGTCACAATCATGTTACCATATCAAGCTGAAAATG		lnc-AMOTL2-3:1
CUST_6298_PI430048170	0.000112	2.52e-06	1.04748	mRNA	NM_016510	RefSeq	238060923	238099413	SCLY	selenocysteine lyase		GGTTCAAGGAACTACTTGATGATTTTGAGGAAACACTTGCCAGAAACTAAATTAACGAAT	NM_016510
CUST_55440_PI430048170	0.000112	2.53e-06	0.962012	mRNA	NM_002389	RefSeq	207752037	207795516	CD46	CD46 molecule%2C complement regulatory protein%2C transcript variant a		TTGGACCAGTCAGCACAGCATGCCTGGTTGTATTAAAGCAGGGATATGCTGTATTTTATA	NM_002389
CUST_60330_PI430048170	0.000112	2.54e-06	1.26097	mRNA	NM_001286746	RefSeq	72727903	72756198	BORA	bora%2C aurora kinase A activator%2C transcript variant 2		TAAATGCACTAACATAAATAGTGACTCTCCAGTTGGAAAAAAGCTGACCATTCATTCTGA	NM_001286746
CUST_28407_PI430048170	0.0423	0.00898	1.91345	ncRNA	ENST00000555947	ENSEMBL_GENCODE	91408708	91605211	RP11-661P17.1			ATGAGGGAAGGAGAGAAATGACTGACATTTATTGTTAAGAAGGAGCTGGAAGTCTCATGC		ENST00000555947
CUST_114952_PI430048170	0.000112	2.54e-06	-1.51977	ncRNA	lnc-NLGN1-1:2	lncipedia	174440986	174737744				AAGGAAATGAGCATTGACTATTAGGCACCTGGATGAAGACTGGGTCCAGATTGTCAGTCT		lnc-NLGN1-1:2
CUST_33959_PI430048170	0.00209	0.000153	1.91321	ncRNA	ENST00000430607	ENSEMBL_GENCODE	36698773	36701564	AP000697.6		+	TTGGCAGAGGCGAACGCAAAAGGTCGAGCTTTCCGATTTCGAGTAGAGTGCCTGGATGGG	AP000697.6
CUST_104769_PI430048170	0.000113	2.55e-06	1.05112	mRNA	NM_001007027	RefSeq	78100941	78139653	ALG8	ALG8%2C alpha-1%2C3-glucosyltransferase%2C transcript variant 2		GAGCTCCTTTATGTTTGGGTGGCATGTTCATGAAAAAGCCATACTTCTAGCAATTCTCCC	NM_001007027
CUST_27497_PI430048170	0.00261	0.000207	1.91089	ncRNA	ENST00000546968	ENSEMBL_GENCODE	105095191	105099004	RP11-44N21.1		-	CCTGAGATAAACTTTATGTGACCTTGGTATTCTGTTGGATTTTGGTTAGCTGATACTTCA		ENST00000546968
CUST_56203_PI430048170	0.000113	2.55e-06	-2.9387	ncRNA	lnc-ZNF25-1:1	lncipedia	38091763	38092051			+	TTCTCCGTTGGGATCTTCCTTATCCTAGGTTGCAGATGCAAGTGGAGTTTCAATCAGAAG		lnc-ZNF25-1:1
CUST_36783_PI430048170	0.0127	0.00174	1.90913	ncRNA	ENST00000583484	ENSEMBL_GENCODE	112361848	112361939	AL365214.1			TGGACAAGTACTGGTCTCAGCAGATTGAGGAGAGCAGCACAGTGGTCACCACGCAGTCCA		ENST00000583484
CUST_36929_PI430048170	0.0134	0.00187	1.90891	ncRNA	ENST00000580521	ENSEMBL_GENCODE	31823018	31823106	AL121652.3		-	AACAGGTCTCAGCAGATTGAGGAGAGCACCACAGTGGTCACCACACAGTCCACCGAGGTT		ENST00000580521
CUST_69148_PI430048170	0.000113	2.56e-06	1.47105	mRNA	NM_014832	RefSeq	75284663	75482114	TBC1D4	TBC1 domain family%2C member 4%2C transcript variant 1		AAATCAGTGATGGAGAAGGGAGAAAAAGGACCTCATCTACCTGCAGCAATGAGTCCCTAA	NM_014832
CUST_93277_PI430048170	0.000113	2.57e-06	-1.54039	mRNA	NM_005246	RefSeq	108747821	109196840	FER	fer (fps/fes related) tyrosine kinase		GTATCCAAGTCTTGGCTACTTATGATTCAGCAGACAGAACAACTTAGTAGGATAATGAAG	NM_005246
CUST_77414_PI430048170	0.000113	2.58e-06	-2.21544	ncRNA	lnc-B3GAT2-3:12	lncipedia	71373501	71420269			-	AATCTACAGAACGAACTCATAAGTTCAGCCTTAACCAGAAAAACTCTTTCATGTAAATCG		lnc-B3GAT2-3:12
CUST_118656_PI430048170	0.000113	2.58e-06	0.777942	mRNA	NM_001304464	RefSeq	203861584	203871152	SNRPE	small nuclear ribonucleoprotein polypeptide E%2C transcript variant 2		TTCCGGAAGTTGCTCTCAGAGGCAGCGTGCGGGTGTGCTCTTTGTGAAATTCCACCATGG	NM_001304464
CUST_105351_PI430048170	0.000113	2.58e-06	0.732626	ncRNA	lnc-GTF2F2-2:37	lncipedia	45390136	45391425			-	ATAAAACCCAGTCTGGCTCAGGGCCATTCTCCTCATGGGAAAACATATCCGCAATATACT		lnc-GTF2F2-2:37
CUST_36537_PI430048170	0.0143	0.00204	1.90849	ncRNA	ENST00000581262	ENSEMBL_GENCODE	22733210	22733301	AL158175.1			ATTAAGGAGAGCACCACAGTGGTCACCACACAGTCCACCGAGGTTGGAGCTGCTGAGATG		ENST00000581262
CUST_116007_PI430048170	0.000153	4.05e-06	1.90769	ncRNA	lnc-CCDC78-1:4	lncipedia	722582	726443			-	ATGGTTCCTCTGAGCAGGTACAAGCACGAAATCCTGAGGCTGAGGAAGCTGGCAGGTGCA		lnc-CCDC78-1:4
CUST_60602_PI430048170	0.0361	0.00721	1.90406	ncRNA	NR_122111	RefSeq	19062376	19107497	LINC01296	long intergenic non-protein coding RNA 1296%2C transcript variant 1		CAATTCAGGGTCCTTTCATAACCTCTACTCTGAGGTGTTAATAAAAAACCTTAGTAACTT	NR_122111
CUST_128076_PI430048170	0.000114	2.59e-06	1.29352	mRNA	NM_145647	RefSeq	123072679	123152152	TBC1D31	TBC1 domain family%2C member 31%2C transcript variant 1		GAGACGGTCGAGAGAGAGACCTATTTTGCAATCAGTGACATTGATTTTTAGATTATTTAT	NM_145647
CUST_34774_PI430048170	0.00733	0.000827	1.90386	ncRNA	ENST00000486571	ENSEMBL_GENCODE	3821681	3828597	RP11-706O15.1			ACTCCATTTACAGGCTAAAATCACACTCGATGTTTTTATGGGATCATTTGATCTGGACAT		ENST00000486571
CUST_139147_PI430048170	0.000114	2.6e-06	-1.20365	mRNA	NM_015241	RefSeq	17787649	18024559	MICAL3	microtubule associated monooxygenase%2C calponin and LIM domain containing 3%2C transcript variant 1		TTTTTTAAAGGTGGTAACATCTGACCCACAAAGGGAATGGGTCTGTTTTATGCAAAATAA	NM_015241
CUST_143094_PI430048170	0.000114	2.6e-06	1.3782	mRNA	NM_014157	RefSeq	58249935	58283830	CCDC113	coiled-coil domain containing 113%2C transcript variant 1		GAAGGGCAAACATATTTCTTAATGAGAGGCAGTCCTTCATGTTTTGCAATAAAATGACTT	NM_014157
CUST_7652_PI430048170	0.00103	5.84e-05	1.90224	ncRNA	NR_004396	RefSeq	76561107	76561193	SNORD1B	small nucleolar RNA%2C C/D box 1B		TCCCTGTCTGAAGGCAAAGAAAGGCCTTTCTGTGTGGAATTTGAATATCTGAAACTCAGT	NR_004396
CUST_115673_PI430048170	0.0022	0.000165	1.9019	ncRNA	lnc-NBAS-16:1	lncipedia	14635331	14635713			+	AAGTGCACAAGGGACAGGCTCGATTTCTTGGAAATCCTGCGATCTGGGGACGCATCCACA		lnc-NBAS-16:1
CUST_142635_PI430048170	0.000114	2.62e-06	-0.780006	mRNA	NM_032950	RefSeq	388	30239	MMP28	matrix metallopeptidase 28%2C transcript variant 2		TGAAAAACTCAGCAGAGAAATTCGAGACCATTTTGCAAGACTGTGCCCTTCTCCTCAGGA	NM_032950
CUST_57924_PI430048170	0.000114	2.62e-06	-1.61216	ncRNA	lnc-MOGAT2-4:1	lncipedia	75668435	75670963			-	CTTAGGACTTTGCCTCTTGGTGATTTGATTTGAGTTCCATAAATAAAATAATGTCTGGTG		lnc-MOGAT2-4:1
CUST_123481_PI430048170	0.000114	2.62e-06	0.862921	ncRNA	NONHSAT102187	NONCODE	74931661	74931817			+	AATAAAATCAGGTACAACTCCAAAAGGAGACATTGGAGAAGAACTAAGCTGGGTCTATTA		NONHSAT102187
CUST_72915_PI430048170	0.000114	2.62e-06	-0.539557	ncRNA	NR_033947	RefSeq	45678164	45688882	LIMD1-AS1	LIMD1 antisense RNA 1	+	AGAGACAGGTTAACACATTGGCTGGCTCAGCCTGTGAAAAAGAACCAATGATGATGCACA	NR_033947
CUST_128278_PI430048170	0.000114	2.62e-06	1.97431	mRNA	NM_001080423	RefSeq	14489110	14540343	GRIP2	glutamate receptor interacting protein 2		ATACTGCAAGACTGAACTACACACCAAGGATCTTGTTCAAATACAAATGTTCCTCCTCAG	NM_001080423
CUST_126340_PI430048170	0.000114	2.63e-06	-2.07967	ncRNA	NR_027078	RefSeq	56092986	56191094	LOC283856	uncharacterized LOC283856	+	CTCATTTCTATGGAACCCAGGTCTAAAGCAGCAACATCTATTTGGAACAAGATGGGGAGG	NR_027078
CUST_136291_PI430048170	0.000114	2.63e-06	0.830417	mRNA	NM_024956	RefSeq	43133523	43185143	TMEM62	transmembrane protein 62		GCTCTCTGCTTCCTTAGTCGGAAGTGTTTTCAACTAATCAAATAAATGAATGAATGATGA	NM_024956
CUST_14936_PI430048170	0.000114	2.63e-06	-1.56534	ncRNA	NR_046681	RefSeq	73623567	73627899	PDZRN3-AS1	PDZRN3 antisense RNA 1	-	GGTGGAATATTATTGGCCTTTGTTCAGATAAGCTTGTGCCAGGGAATCCTCCATCAGTAT	NR_046681
CUST_77362_PI430048170	0.000115	2.64e-06	-4.10978	ncRNA	lnc-BMP5-3:1	lncipedia	56125390	56126643			-	TTAGAACAGTTAGCTCTGTTCACCCTTCTTAGGGGATTAATTCAGAACAATGAAAAAAGA		lnc-BMP5-3:1
CUST_127607_PI430048170	0.000115	2.64e-06	1.06862	mRNA	NM_001015885	RefSeq	57351561	57378463	RAE1	ribonucleic acid export 1%2C transcript variant 2		CGTCTGTGAGCCCCGTGCTGTATTTTGTAATAAAGTCTTTTGCAGATTGCTTCCCGAAAA	NM_001015885
CUST_112009_PI430048170	0.000115	2.64e-06	1.72818	mRNA	NM_014109	RefSeq	123319850	123396465	ATAD2	ATPase family%2C AAA domain containing 2		AATGTGGAAATAACGGAGCAACTTGCTAATGGCAGGCATTTTACAAGGCAGTTGGCCAGA	NM_014109
CUST_119321_PI430048170	0.000115	2.65e-06	1.3798	mRNA	NM_053056	RefSeq	69641104	69654474	CCND1	cyclin D1		CCAGAGTGATCAAGTGTGACCCGACTGCCTCCGGGCCTGCCAGGAGCAGATCGAAGCCCT	NM_053056
CUST_62048_PI430048170	0.000115	2.65e-06	0.822543	ncRNA	lnc-DENND4A-1:1	lncipedia	65816301	65817481				CCATGACTCTGTGGATAAGACTGTCATTCAGAAATAACCATACTGTGAAGTTAGGAAAGC		lnc-DENND4A-1:1
CUST_75467_PI430048170	0.000115	2.65e-06	-1.44648	mRNA	NM_176895	RefSeq	55424841	55535078	PPAP2A	phosphatidic acid phosphatase type 2A%2C transcript variant 2		CGATGGTTACATTGAATACTACATATGTCGAGGGAATGCAGAAAGAGTTAAGGAAGGCAG	NM_176895
CUST_13048_PI430048170	0.000115	2.66e-06	-1.35506	ncRNA	ENST00000416395	ENSEMBL_GENCODE	70029998	70086267	PCBP1-AS1			TGCCAATAGTTTTTCAAGTCAGCAATTACTGTGTGGATTATGTAATGGCTCGGTATTAAA		ENST00000416395
CUST_86640_PI430048170	0.000116	2.68e-06	-2.0111	ncRNA	lnc-AKAP6-2:1	lncipedia	32993977	32994707			+	GAAGCTAATCTTTGATGCAGGTTGCAAGATAACTGCTTGCTACTGGGAACTTAAATTAAA		lnc-AKAP6-2:1
CUST_73890_PI430048170	0.000116	2.68e-06	-1.63208	mRNA	NM_178335	RefSeq	191329084	191398670	CCDC50	coiled-coil domain containing 50%2C transcript variant 2		TAAACCAAAGTATTCTATAAGTCTGTGTGCTTTGTTTTCCTGGATGGTTTGACCAAGGTA	NM_178335
CUST_137180_PI430048170	0.000116	2.68e-06	0.824785	mRNA	NM_003721	RefSeq	19192198	19201869	RFXANK	regulatory factor X-associated ankyrin-containing protein%2C transcript variant 1		ATCCATTGGAAGAGAAAAGTTTGTGACTTGGGCCCCCAAGTTTTGAGAGAACTGGGCTTT	NM_003721
CUST_145478_PI430048170	0.000116	2.7e-06	-2.81598	mRNA	NM_033254	RefSeq	113211464	113287463	BOC	BOC cell adhesion associated%2C oncogene regulated%2C transcript variant 2		CTTCCAGAATCAATAATCCGTGGCAACATATCTCTGTAAAAACAAACACTGTAACTTCTA	NM_033254
CUST_136883_PI430048170	0.000116	2.7e-06	0.689581	mRNA	NM_017818	RefSeq	3630766	3650107	WRAP73	WD repeat containing%2C antisense to TP73		CACTGTGGTGGTCTGGATTCAGTGATTGATTCTATTTTTCTATAGCAAAGCATTTTTGTA	NM_017818
CUST_118827_PI430048170	0.000117	2.73e-06	-1.29644	ncRNA	NR_038921	RefSeq	22252071	22258548	LOC100130992	uncharacterized LOC100130992		CATGGCATTTTGTGCTTCTCTCTTTTATGGGAAAGCTTACAATTAACTTACCAGGTTTTT	NR_038921
CUST_28318_PI430048170	0.000118	2.75e-06	-1.59695	ncRNA	ENST00000618330	ENSEMBL_GENCODE	84599434	84606463	RP11-182J1.17		+	CAGCAGTTGCTACTCTTTCTCAGTTTGCTGTTTGTTTTCTGCTGGTTTATTAAATATAGA		ENST00000618330
CUST_58047_PI430048170	0.000118	2.75e-06	0.717312	ncRNA	lnc-VSTM5-1:8	lncipedia	93730271	93736175			-	TAAAAAGGGCAAACTTGAAGATAAATCTTTTGACTCCAGCTCTTTAGAGGATCTAAAGTG		lnc-VSTM5-1:8
CUST_46637_PI430048170	0.000118	2.75e-06	-2.27602	ncRNA	NR_109931	RefSeq	45972969	45974953	LOC101928796	uncharacterized LOC101928796		GTCATGTTCTAAGTTGGGAGGAAAATTCACTGGATAGTGGAGGCAGTAGAAAGAAATAAA	NR_109931
CUST_93781_PI430048170	0.00177	0.000122	1.9001	ncRNA	lnc-TRIM23-2:4	lncipedia	65561115	65563123			-	GTATCTTATGGGTATAGCAGGTGAGATTTTCAGCCTTCTACTAGTTGACATTCAAATTGT		lnc-TRIM23-2:4
CUST_112529_PI430048170	0.000119	2.78e-06	-0.592402	mRNA	NM_014911	RefSeq	69457994	69643845	AAK1	AP2 associated kinase 1		GGTGGCTCCTCTCCGAGGTGAAATCTGAGAAGAAATCCTTGGATCTCTTTTCTTAAAAAA	NM_014911
CUST_82041_PI430048170	0.00012	2.79e-06	-1.16095	ncRNA	lnc-ALG13-8:1	lncipedia	111096324	111098786			+	TTAACCAAGAGAACAAGAAACTCAATGAGCAGCAGCCTCAACAACTGGCTCTTTCCTCCT		lnc-ALG13-8:1
CUST_91508_PI430048170	0.000352	1.3e-05	1.89948	ncRNA	lnc-CDH18-13:1	lncipedia	18719846	18720415				CCAAACTGCAACCATCTCAGGTCACTTTACACATTTTTCTTTCAGATTTTCTGTTTCCTG		lnc-CDH18-13:1
CUST_47890_PI430048170	4.96e-05	7.04e-07	1.89851	ncRNA	lnc-ZNF674-1:7	lncipedia	46323447	46327419				AGGAGGATGGGAACCAGGGACAGAGAAGCTACTTGCTCTGCAGCTGTTTGGGCCAATGAT		lnc-ZNF674-1:7
CUST_54443_PI430048170	0.00334	0.000289	1.89332	ncRNA	lnc-HENMT1-2:1	lncipedia	108690748	108692524			+	AGTGCTTTAACATATTCAGTGAATCCCTACAACAGGCTGAAGATGTTATTTTTATCCCCA		lnc-HENMT1-2:1
CUST_68376_PI430048170	0.000636	2.99e-05	1.89324	ncRNA	NR_034031	RefSeq	3817534	3843894	LOC389906	zinc finger protein 839 pseudogene		ATAGAGTGGAAAGTCCCACAATCTTTTTCTTCTCTATTTTCAAAAAACGTTGACCTCTTG	NR_034031
CUST_81920_PI430048170	0.00012	2.81e-06	0.825526	ncRNA	lnc-HMGN5-6:1	lncipedia	82497668	82497924				ATCCGGCAGATTATGGTGGTTATGATGGAGGATATGTACAAGATTATGAAGACTTCATGT		lnc-HMGN5-6:1
CUST_53522_PI430048170	0.0061	0.000644	1.89187	ncRNA	lnc-MFAP2-1:2	lncipedia	16976248	16978314			-	AGTACACCCACTATAGCGACCAGATCGACAACCCAGACTACTATGATTATCAAGGTAACG		lnc-MFAP2-1:2
CUST_141451_PI430048170	0.000121	2.83e-06	-2.94589	mRNA	NM_002178	RefSeq	53097651	53102344	IGFBP6	insulin-like growth factor binding protein 6		GAAAGAGTGTTGGTGTTGGCTGGGGTGTCAATAAAGCTGTGCTTGGGGTCGCTGAAAAAA	NM_002178
CUST_126874_PI430048170	0.000121	2.84e-06	0.623696	mRNA	NM_021930	RefSeq	105532084	105567677	RINT1	RAD50 interactor 1		CAACTTTCAATTTCCTGTGCTAATTAAGGGAAATTCTGTTGTGGATAATCAAACATAGCC	NM_021930
CUST_23275_PI430048170	0.00652	0.000706	1.89108	ncRNA	ENST00000598447	ENSEMBL_GENCODE	112406274	112409490	RP11-324O2.3		+	TACAGAGGTACAGCTACCATAGAGTACGTGTAACAAGCCAATTCGGAGATGATCCACTGT		ENST00000598447
CUST_128823_PI430048170	0.000122	2.86e-06	1.05617	mRNA	NM_001161441	RefSeq	156806242	156816848	SH2D2A	SH2 domain containing 2A%2C transcript variant 1		TTGTTGATTCTTGTCTGGCTAATAAATCATCACCAACTGCCTTCTCCTACAGGGAAAAAA	NM_001161441
CUST_17975_PI430048170	0.000122	2.86e-06	0.816491	ncRNA	NR_122044	RefSeq	149063316	149109787	LOC255187	uncharacterized LOC255187	-	CCCCCAGCTGCTGGTGTGCAGGAAAAGAATCCAGGAGATCACCTGATGAAGCCCAGCATT	NR_122044
CUST_53683_PI430048170	0.000122	2.87e-06	0.911984	ncRNA	NR_024127	RefSeq	28578537	28581854	SNHG12	small nucleolar RNA host gene 12	+	GCATGCTAATGCAAAAAATTATGCAGTGTGCTACTGAACTTCAGAGGTGATCAATAAAAG	NR_024127
CUST_57602_PI430048170	0.000122	2.87e-06	0.596276	mRNA	NM_016464	RefSeq	61362000	61369503	TMEM138	transmembrane protein 138%2C transcript variant 1		TATTCCATAAGTTCAAAGGGACCATCATCCTGACAGCTGTGTACTTTGCCCTCAGCATCT	NM_016464
CUST_94692_PI430048170	0.000123	2.89e-06	0.761344	ncRNA	lnc-SV2C-2:2	lncipedia	76376674	76377149			+	TTGACAAAACAACGGCTGCATTTCAACAAGGAAAGATACCTCCTGCTCCATTCTCTGCTC		lnc-SV2C-2:2
CUST_131817_PI430048170	0.000123	2.89e-06	-3.84484	mRNA	NM_198148	RefSeq	123745635	123891984	CPXM2	carboxypeptidase X (M14 family)%2C member 2		CAAGAAAAAAGTATGTCTCACTTTTTGTTAATGTTGCTGCCTCATTGACCTGGGAAAAAT	NM_198148
CUST_78610_PI430048170	1.46e-06	3.1e-09	1.88827	ncRNA	lnc-KCTD7-3:1	lncipedia	66511555	66545066				GCCTTTCCAAGGACTCATCCGAAAGCCTGGATGAAGATGATACCAACAGACTTGGGGAGG		lnc-KCTD7-3:1
CUST_74808_PI430048170	0.000563	2.51e-05	1.88684	ncRNA	lnc-HSPA4L-2:1	lncipedia	127890996	127892693			+	GCCATGGTTAAGTACTCCTAAGTATTATGTATGTCAGAGCTGTTCTAGTAAACAAAAGAA		lnc-HSPA4L-2:1
CUST_139929_PI430048170	0.000124	2.92e-06	-1.58026	mRNA	NM_001145304	RefSeq	18257095	18274509	KIAA1683	KIAA1683%2C transcript variant 1		TGGGAGGCACTCATGGCTCTCTGGGTCTAATGAATAAAGTCCTCCACAGCCTAGAAAAAA	NM_001145304
CUST_11006_PI430048170	0.000124	2.92e-06	-2.80146	mRNA	NM_198715	RefSeq	71005853	71047808	PTGER3	prostaglandin E receptor 3 (subtype EP3)%2C transcript variant 5		TGGGGGTTCTAGGCCTAGGACCAGATCTTATTGTCTCTACAATCTTGATTCTTTAGTATT	NM_198715
CUST_132206_PI430048170	0.000124	2.92e-06	0.952859	mRNA	NM_022366	RefSeq	246540560	246566263	TFB2M	transcription factor B2%2C mitochondrial		GCAAAACTGATTTACTGGTTTGCCTTTCAGTTTGTTGAAATGTATTGTCAAGTACTGTAC	NM_022366
CUST_122154_PI430048170	0.00986	0.00123	1.8863	ncRNA	NR_110016	RefSeq	51831796	51862913	LINC01429	long intergenic non-protein coding RNA 1429	-	GAATTGTGCATGCAACTTCCAATCTGACTTTTCTGAGACATTAATAAAAACACATGCGTC	NR_110016
CUST_99135_PI430048170	0.00102	5.72e-05	1.8857	ncRNA	lnc-ARSD-4:1	lncipedia	2952830	2953228			-	GCTATGCCACTGGACTCATTGGTTGTTTTCTGCAAAGTAGATACTCAAGAAATACCAGCT		lnc-ARSD-4:1
CUST_88684_PI430048170	0.000124	2.93e-06	0.806707	ncRNA	lnc-AMIGO2-6:1	lncipedia	47345852	47346326				TAATCACAACAGACCTGCCCAGAAGGGCCTCTCTATTTCTAGGAGTATGATAGCTTTTGG		lnc-AMIGO2-6:1
CUST_142565_PI430048170	0.000124	2.94e-06	-0.921593	mRNA	NM_194278	RefSeq	73715121	73760298	ELMSAN1	ELM2 and Myb/SANT-like domain containing 1%2C transcript variant 1		GCCTTTTGTGTGTTTGCTGCCTGTGGCATCCTTTTTTAAAAAGACTGTTACATATTAAAA	NM_194278
CUST_138611_PI430048170	0.000124	2.95e-06	1.7851	mRNA	NM_005508	RefSeq	32951573	32954911	CCR4	chemokine (C-C motif) receptor 4		TAACCTGAACTGATGGGTTTCTCCAGAGGGAATTGCAGAGTACTGGCTGATGGAGTAAAT	NM_005508
CUST_131563_PI430048170	0.000124	2.95e-06	1.03782	mRNA	NM_003875	RefSeq	155870535	155937731	GMPS	guanine monphosphate synthase		GAACTACTGAGTGGGAGTAATAAACTTCTTGTTCTATTAAAGTACCGTGTGCAGTTTAAA	NM_003875
CUST_24589_PI430048170	0.000124	2.95e-06	-3.2708	ncRNA	NR_024344	RefSeq	133896434	133901740	MIR4697HG	MIR4697 host gene	-	GGAGTGTTGCAAGTTAAACTGATGAAAAGACGTTTAGTATTTAATTGCTCCTCATGTAAC	NR_024344
CUST_138165_PI430048170	0.000125	2.96e-06	-2.32057	mRNA	NM_207577	RefSeq	75602859	75668434	MAP6	microtubule-associated protein 6%2C transcript variant 2		GTGCTTGTGGTCTGTGCTTGCTCAGAAAAACAAACAAACAAACAGTTTTTCCAATTATAA	NM_207577
CUST_79123_PI430048170	0.00244	0.000189	1.88552	ncRNA	lnc-HILPDA-1:4	lncipedia	128456358	128458415			+	AGCACAGGGGTTGTGTATTGTGCCTTGCAGGAACAAAATTTTCAATAAAGTAAATGTTTG		lnc-HILPDA-1:4
CUST_118159_PI430048170	0.000125	2.97e-06	-1.56903	ncRNA	NR_047525	RefSeq	827797	859446	LINC01128	long intergenic non-protein coding RNA 1128%2C transcript variant 8		GGTTTCTAATCACAAGGAAGATGGAGAAAATGCAGAACAAGTGGTCAAGAACAGGGAGAT	NR_047525
CUST_123664_PI430048170	0.000384	1.47e-05	1.88529	ncRNA	NR_109892	RefSeq	163482603	163494058	HMMR-AS1	HMMR antisense RNA 1	+	GTTCTCCAGCTTAAGATCTTCTATCTCACTGGCTGTTAACGCTTTATAGCTTATTAAAAA	NR_109892
CUST_132842_PI430048170	0.000125	2.98e-06	1.16973	mRNA	NM_207340	RefSeq	66539263	66546200	ZDHHC24	zinc finger%2C DHHC-type containing 24		GGGGCTGCTCAGGCCGCCTAGCTGCCCCTTTGCCAGGTTAATAAAGCACTGACTTGTTAA	NM_207340
CUST_139597_PI430048170	0.000125	2.98e-06	-2.79608	mRNA	NM_030569	RefSeq	7559269	7666998	ITIH5	inter-alpha-trypsin inhibitor heavy chain family%2C member 5%2C transcript variant 1		CTCTTGGAACTGTAGGACATGATCCAGCTAAAATAAATAACAAATAACACAGCTAAGCAA	NM_030569
CUST_130011_PI430048170	0.000126	2.99e-06	1.2134	mRNA	NM_000194	RefSeq	134460144	134500668	HPRT1	hypoxanthine phosphoribosyltransferase 1		GACTGTATTTTCCAACTTGTTCAAATTATTACCAGTGAATCTTTGTCAGCAGTTCCCTTT	NM_000194
CUST_34450_PI430048170	0.000126	3e-06	-1.57613	ncRNA	ENST00000428584	ENSEMBL_GENCODE	27992469	28008581	TTC28-AS1		-	CTCTTGCTACCTGTCCTAGAACCTTGGTTTTTAAATTTAAATACAGGAAACAGGGAATTT		ENST00000428584
CUST_66106_PI430048170	0.00726	0.000816	1.88222	ncRNA	lnc-SFTPB-2:1	lncipedia	85686052	85687047				AGATTCCAGCACTGAGATGAGTTCTCTGGTTGTACTTTGTCAATAGTTTTCTCATCGCTA		lnc-SFTPB-2:1
CUST_24789_PI430048170	0.0245	0.00426	1.88165	ncRNA	NR_038920	RefSeq	12979836	12984642	LOC100506314	uncharacterized LOC100506314	-	GACTCTGAGCTTGACCATTCAACTTCGAAACTTTAACATCAATGGATCAGCACACACTGG	NR_038920
CUST_112249_PI430048170	0.000126	3e-06	0.699178	mRNA	NM_001145408	RefSeq	71283191	71301171	NONO	non-POU domain containing%2C octamer-binding%2C transcript variant 1		CTGTTATACCCCATATATTACCCCTTCATGTCCTAAAGAAGACATTTTCTCTTAGAGATT	NM_001145408
CUST_4951_PI430048170	1.99e-05	1.66e-07	1.88165	ncRNA	NR_002910	RefSeq	38425194	38425330	SNORA71B	small nucleolar RNA%2C H/ACA box 71B		TTCCCCGTGTTTGAAGGGTCCACTCCTATCCCTTCCAAACTCTGGAGCTTTCGTACATGC	NR_002910
CUST_142655_PI430048170	0.000126	3.01e-06	0.968674	mRNA	NM_012341	RefSeq	988408	1017768	GTPBP4	GTP binding protein 4		GCTCATGTTTTGGTTTAGTTATAGTCGCTATGGATTTGGCCAAATAAAAAGGCAAACAAC	NM_012341
CUST_137158_PI430048170	0.000126	3.01e-06	-1.89629	mRNA	NM_152996	RefSeq	76074703	76630984	ST6GALNAC3	ST6 (alpha-N-acetyl-neuraminyl-2%2C3-beta-galactosyl-1%2C3)-N-acetylgalactosaminide alpha-2%2C6-sialyltransferase 3%2C transcript variant 1		CGTATATATACACGTGTGGTTCTATTTAGGTGGGGAAAAAATGAAAAAGCAGGGACAACA	NM_152996
CUST_28572_PI430048170	0.000126	3.01e-06	-1.64751	ncRNA	NR_120374	RefSeq	100372938	100437914	CERS3-AS1	CERS3 antisense RNA 1	-	GTGTGGCTCCGATAGGATTGACAACTACTACCTTAGATGATGAATCAAGCTCAGAAGGGA	NR_120374
CUST_6022_PI430048170	0.00171	0.000116	1.8798	ncRNA	NR_047498	RefSeq	47179249	47180339	LINC00853	long intergenic non-protein coding RNA 853		CCTGATCTAATGGATCCTTGAAGCACAATAAACAGATAGTATTTCTGCATGTGTCAAAAA	NR_047498
CUST_142777_PI430048170	0.000126	3.02e-06	1.7434	mRNA	NM_005189	RefSeq	79778177	79787650	CBX2	chromobox homolog 2%2C transcript variant 1		TGTTTGTGTTTGTGTAGCTAGGTATCTGGCACTTCTGACGATGCATTGTTGCTTTTTTCC	NM_005189
CUST_138813_PI430048170	0.000126	3.02e-06	2.19004	mRNA	NM_006716	RefSeq	87876228	87909541	DBF4	DBF4 zinc finger		ACACCTTTGTTTTTCATACCAGTACCTGAAGTAGGCTCAATAAAAGAGTCTTTACAGTGA	NM_006716
CUST_14274_PI430048170	0.00423	0.000395	1.8797	ncRNA	ENST00000606673	ENSEMBL_GENCODE	219685492	219737937	AC009502.4			CCAATGAAAACACCTACATCACCTCGTTTTAATAGCGACAAACTTGAGAATTTTTGATAC		ENST00000606673
CUST_39334_PI430048170	0.000126	3.03e-06	1.40981	mRNA	NM_001170543	RefSeq	132710806	132722737	PGAM5	phosphoglycerate mutase family member 5%2C transcript variant 1		TGACCATGAACCCCCAGGATGGCGTGGGGTTTAAGGTGAAAGCGTCTCACGCACAAGTCA	NM_001170543
CUST_142668_PI430048170	0.000126	3.04e-06	1.02446	mRNA	NM_006406	RefSeq	23667527	23686397	PRDX4	peroxiredoxin 4		CTTTCAGATTTGACCCATCAGATCTCAAAGGACTATGGTGTATACCTAGAGGACTCAGGC	NM_006406
CUST_96748_PI430048170	0.000126	3.04e-06	0.811024	ncRNA	lnc-PABPC1L2B-4:1	lncipedia	73224070	73225073			+	CTGTGTATCAGTCTTGAAATGTTCTGTTTAAATCAGTATGCTTAATGTGTTCTGGGCATT		lnc-PABPC1L2B-4:1
CUST_136671_PI430048170	0.000126	3.04e-06	2.33641	mRNA	NM_144492	RefSeq	36460620	36480090	CLDN14	claudin 14%2C transcript variant 1		CAGTGGGGTTGGTTTGTGATCCAGGAATAAACCTTGCGGATGTGGCTGTTTATGAAAAAA	NM_144492
CUST_29275_PI430048170	0.0152	0.00222	1.87915	ncRNA	ENST00000623877	ENSEMBL_GENCODE	53391089	53392473	RP11-44F14.10			GTCTTGGAGAGAGATAGCTCATGGGCATATGTTATGTTGTATTTATTATCTACTATCTAG		ENST00000623877
CUST_52193_PI430048170	0.000126	3.05e-06	0.874971	ncRNA	lnc-FLAD1-2:2	lncipedia	154992588	154993111			+	TGTGACTATTCTATTACTCTGACCTCCCAGGACTGGACCTACAGAGACATCTGGGATTTT		lnc-FLAD1-2:2
CUST_95103_PI430048170	0.000126	3.05e-06	0.943887	mRNA	NM_152318	RefSeq	104986319	104994727	C12orf45	chromosome 12 open reading frame 45		CAGCATCCCATCTGAAGTCACCATAGATAACATTAAGCTTCCCAATTCTGAAGGTGGAAA	NM_152318
CUST_75464_PI430048170	4.16e-05	5.33e-07	1.87788	ncRNA	lnc-SKIV2L2-1:2	lncipedia	55279533	55283804			-	GCTGTTTCAGTTTATTCAGAAGTTTGGCAATAAAAAGATCACGTGGTTTATTGGTTTCCA		lnc-SKIV2L2-1:2
CUST_95118_PI430048170	0.000128	3.08e-06	0.611344	ncRNA	lnc-CYP4A22-2:7	lncipedia	47179136	47179911				TAGACAGCACCCTGGGCCCTGCAAGGAATGTACTATAGAGCCAATTTTACCGGCAAAGGA		lnc-CYP4A22-2:7
CUST_25074_PI430048170	5.33e-05	7.89e-07	1.87338	ncRNA	ENST00000552933	ENSEMBL_GENCODE	48998367	49019235	RP11-386G11.5		-	AAATATGTACAGTTCAGAATGATCGCTGATACAAAACATGCCAAGGACAGGGGCGCTGAG		ENST00000552933
CUST_115834_PI430048170	0.000128	3.09e-06	0.763574	ncRNA	lnc-SAFB2-3:1	lncipedia	5576659	5576938			-	CTGGGTCGGATCATGCTAAAAGGAGGTAATATTACTCTGCTGCAAAGTGTCTCCAACTAG		lnc-SAFB2-3:1
CUST_104824_PI430048170	0.000128	3.09e-06	-5.24059	mRNA	NM_001927	RefSeq	219418376	219426739	DES	desmin		ACAGCAGCAGCATGAAGTGCTCTAAAGACAGAGACCCTCTGCCACCAGAGACCGTCCTCA	NM_001927
CUST_56137_PI430048170	0.000128	3.09e-06	-0.886235	ncRNA	lnc-LYZL1-9:1	lncipedia	29456135	29457299			-	GCTGTGGGATAAAGAACTTCTGCTGAATGATGATTTGCAAAAGTATGTCTTCATTATAGT		lnc-LYZL1-9:1
CUST_63620_PI430048170	0.000128	3.09e-06	0.775504	mRNA	NM_022156	RefSeq	82057871	82065821	DUS1L	dihydrouridine synthase 1-like (S. cerevisiae)		TGGACCTGCCCTGTCCTCAGCACGCGTGTGCAAAAGTGAACAATAAATCATTTCAAAGAT	NM_022156
CUST_119672_PI430048170	0.000128	3.09e-06	0.881204	mRNA	NM_006191	RefSeq	56104318	56113910	PA2G4	proliferation-associated 2G4%2C 38kDa		GAAGAAAGTATTGCTTTTCCCACCAGCATTTCGGTAAATAACTGTGTATGTCACTTCTCC	NM_006191
CUST_141950_PI430048170	0.000128	3.1e-06	-2.29213	mRNA	NM_024605	RefSeq	147732301	148072776	ARHGAP10	Rho GTPase activating protein 10		CTGTTTTCCAAACACCACCTTTTTGCCTCAAGGTCTCTGTAAATGAAATAAACTGTAATT	NM_024605
CUST_109263_PI430048170	1.32e-06	2.58e-09	1.87149	ncRNA	lnc-TDRD1-1:1	lncipedia	114246073	114246714			+	CACATTCCCTGACTGTAACAGAGGGACCCAGGACCTCATTTTAAGACTGTTGAAGCATAA		lnc-TDRD1-1:1
CUST_366_PI430048170	0.000451	1.84e-05	1.87144	ncRNA	NR_109935	RefSeq	9511332	9518086	CTD-2201E9.1	uncharacterized LOC101929338	-	GTTGAAAATGACTTGCAATTCACAAAGAGCAGAACAACTCTATTTCACCCACCAAAAAAC	NR_109935
CUST_19461_PI430048170	0.00685	0.000756	1.8714	ncRNA	NR_125740	RefSeq	8262224	8343281	LOC100505938	uncharacterized LOC100505938	-	GCCTGCTGTACCTGGAAATCAAGTTTGAGCTTCGAGAATAAAGGTCATGTTTTAAAAACA	NR_125740
CUST_19133_PI430048170	0.0252	0.00443	1.87088	ncRNA	ENST00000607749	ENSEMBL_GENCODE	136550661	136552554	RP3-325F22.5		-	CACCCTCCAGAATCTATTGTCGTATGTTTTGTTCACCAAAGGTAATAAAAATAAATGTGG		ENST00000607749
CUST_38537_PI430048170	0.000489	2.06e-05	1.87082	ncRNA	ENST00000572856	ENSEMBL_GENCODE	3603738	3608336	DLGAP1-AS2		-	TTCTTATCTGGCTGCTTATCATTTCCAGAACATACCATCCTTTTGCATGCCTTTACGCCA		ENST00000572856
CUST_60029_PI430048170	0.000129	3.15e-06	0.778762	mRNA	NM_181503	RefSeq	37000540	37009616	EXOSC8	exosome component 8		TGGCAACAGGAACCTTAACAATAGTAATGGATGAGGAAGGCAAACTCTGTTGTCTTCACA	NM_181503
CUST_57250_PI430048170	0.000129	3.15e-06	0.751214	ncRNA	lnc-COPB1-2:4	lncipedia	14513663	14517673			-	CCTGTGTCTCGTCTTGTATCTCTAATTGGAAGCAGTATCCTTTTTATGTTAGCATTTATG		lnc-COPB1-2:4
CUST_139455_PI430048170	0.00013	3.17e-06	0.551466	mRNA	NM_001019	RefSeq	18782954	18790334	RPS15A	ribosomal protein S15a%2C transcript variant 2		ATCTAAGCCACAATGGTGCGCATGAATGTCCTGGCAGATGCTCTCAAGAGTATCAACAAT	NM_001019
CUST_20073_PI430048170	0.000284	9.74e-06	1.86998	ncRNA	ENST00000602761	ENSEMBL_GENCODE	106777542	106782852	RP5-884M6.1			ATCCTAGGCTCTCCAAATGGGAGTCTAAAGGTCTCAAAACATGGTCCAGAAGAAGTATGC		ENST00000602761
CUST_48672_PI430048170	0.00013	3.17e-06	0.777727	ncRNA	lnc-RALGAPA2-1:1	lncipedia	20721673	20722391				ATTGGGTACTGTCCATTCTGGTCTAGAAGTCTTTTTGTTTCTCTTAATCTCAGTTTCCAT		lnc-RALGAPA2-1:1
CUST_31033_PI430048170	0.00013	3.18e-06	-2.344	ncRNA	ENST00000612163	ENSEMBL_GENCODE	76709760	76710045	RP11-318A15.8			TAGGAGGGTGTTAGATGTGTAGCTTGAAAACGACAATAAAAAGGACTGCTGGGATCGGGT		ENST00000612163
CUST_129092_PI430048170	0.00013	3.18e-06	-2.12318	mRNA	NM_000324	RefSeq	49605176	49636874	RHAG	Rh-associated glycoprotein		TGCATGTTGACTATTTGCAACGAGCTCAAATGCTATCTGATCAAAGTCTATTTTGCATAA	NM_000324
CUST_127595_PI430048170	0.00013	3.18e-06	-4.11439	mRNA	NM_000961	RefSeq	49503873	49568170	PTGIS	prostaglandin I2 (prostacyclin) synthase		CGTATAACATTGTCAAGTGGAAACATGCTGAAATCTATTAAACCATCTTTGTTTGTGGAA	NM_000961
CUST_81717_PI430048170	0.000131	3.19e-06	1.09991	mRNA	NM_177439	RefSeq	48476020	48486364	FTSJ1	FtsJ RNA methyltransferase homolog 1 (E. coli)%2C transcript variant 3		TTGAGTGAGGTCTTACCTCTTCTTTAAACCTCTTCAGGAGTGTCCTGATTATGTCCAGAA	NM_177439
CUST_133487_PI430048170	0.000131	3.2e-06	-1.73211	mRNA	NM_012301	RefSeq	78017056	79453574	MAGI2	membrane associated guanylate kinase%2C WW and PDZ domain containing 2%2C transcript variant 1		AATCCCATTCCAAATAATATTTGTGTAGTGTTAGCTGTGAATTTACCCTGTACAGCTGTA	NM_012301
CUST_46678_PI430048170	0.00185	0.000129	1.8667	ncRNA	lnc-F3-2:3	lncipedia	94616396	94620987				AATTGAGTGCAGCACTCATACCTTTCTTCGAGCATGAACCGTCAATCAACACTGCCTCAT		lnc-F3-2:3
CUST_64509_PI430048170	0.000131	3.21e-06	0.648605	ncRNA	lnc-C19orf60-1:2	lncipedia	18589871	18592336			+	TTTATAGTTCCCATCCGCTCTTGTAGGGTAATTAAAACCATGGAGGCGATCAGCGAGGTT		lnc-C19orf60-1:2
CUST_113867_PI430048170	0.000131	3.21e-06	-2.21644	mRNA	NM_001174064	RefSeq	38411137	38468834	FGFR1	fibroblast growth factor receptor 1%2C transcript variant 11		ACAAAGAGATGGAGGTGCTTCACTTAAGAAATGTCTCCTTTGAGGACGCAGGGGAGTATA	NM_001174064
CUST_144051_PI430048170	0.000131	3.21e-06	-1.49633	mRNA	NM_030802	RefSeq	49710324	49764156	FAM117A	family with sequence similarity 117%2C member A		CAGCTGTTTGAAGTTTGTATATTTTCCGTACTGCAGAGCTTACACAAAATTGAAGAATGT	NM_030802
CUST_129615_PI430048170	0.000131	3.21e-06	-1.66361	mRNA	NM_001130413	RefSeq	1280435	1292029	SCNN1D	sodium channel%2C non voltage gated 1 delta subunit%2C transcript variant 1		AGGCCCCACGGACACACTTGGGCTGCTCTGAAATAAAGCTGTTGACTCCACCTGAAAAAA	NM_001130413
CUST_104408_PI430048170	0.000132	3.25e-06	-2.29017	mRNA	NM_015204	RefSeq	11370434	11832198	THSD7A	thrombospondin%2C type I%2C domain containing 7A		ATCCAGAAAGACAAAGACATTCCTGCGGAGGATATCATCTGTGAGTACTTTGAGCCCAAG	NM_015204
CUST_49421_PI430048170	0.0404	0.00841	1.86407	ncRNA	NR_122113	RefSeq	15784953	15827434	DUXAP8	double homeobox A pseudogene 8		ATCCTCACAGGCACTGGACAATTCAAAAAACGTAAAGTTGTTTGTTAGAATACTGGTGCT	NR_122113
CUST_91814_PI430048170	0.000133	3.27e-06	0.755994	ncRNA	NR_046101	RefSeq	46887418	46899704	LINC01545	long intergenic non-protein coding RNA 1545		GCATCAACAAATCACCACTCTGGGTTTATGCAACTTGTTTCCTAATTGAATAAAATAAGC	NR_046101
CUST_119627_PI430048170	0.000133	3.28e-06	0.908145	ncRNA	NONHSAT028090	NONCODE	49265081	49265187			+	ACTACTTCTCCCCCGGACTCCTTGGTAGTCTGTTAGTGGGAGATCCTTGTTGCCGTCCCT		NONHSAT028090
CUST_1377_PI430048170	0.00282	0.00023	1.86151	ncRNA	NR_120664	RefSeq	142325292	142464054	LOC101926941	uncharacterized LOC101926941	-	TGGACATCAACCGGGAAGAGCTGAAAGATGGCGTTACCAGAACAACTTCCAGTAAAAGAA	NR_120664
CUST_132761_PI430048170	0.000134	3.29e-06	-1.25078	mRNA	NM_000543	RefSeq	6390413	6394998	SMPD1	sphingomyelin phosphodiesterase 1%2C acid lysosomal%2C transcript variant 1		TGCGACCTGATGCTGCCAGTCTGTTAAAATAAAGATAAGAGACTTGGACTCCAGAAAAAA	NM_000543
CUST_141274_PI430048170	0.000134	3.29e-06	1.38385	mRNA	NM_024926	RefSeq	139133743	139191986	TTC26	tetratricopeptide repeat domain 26%2C transcript variant 1		CAGTTTCTGGCATCAGTGTACTATTTATAGTCTATAGCATACATTACTTGCAAATGGGAA	NM_024926
CUST_128936_PI430048170	0.000134	3.31e-06	4.41023	mRNA	NM_021147	RefSeq	55231152	55233717	CCNO	cyclin O%2C transcript variant 1		AGCGAGCACATGAGGAAGCTGAGTCTTTCACCAATAAACAGTTGTGGTTTGTCTAAAAAA	NM_021147
CUST_56697_PI430048170	0.000134	3.31e-06	1.83201	mRNA	NM_001289067	RefSeq	94545766	94602099	HELLS	helicase%2C lymphoid-specific%2C transcript variant 2		AAGTTTAGTAAATGTCTTTTTCCCTCCTTTCTTCTAGTAATGCAGTTCATGGGCTTTAGG	NM_001289067
CUST_138464_PI430048170	0.000135	3.33e-06	1.19798	mRNA	NM_001199815	RefSeq	30496620	30504841	GGCT	gamma-glutamylcyclotransferase%2C transcript variant 2		AATGTGGGATAGAGACCCCAAAATTCCTGTTCAGAACCTAAGCTTAGCTCTCTGTTGGCA	NM_001199815
CUST_136648_PI430048170	0.000135	3.33e-06	2.1983	mRNA	NM_004655	RefSeq	65528564	65561622	AXIN2	axin 2		CACCTTTCCTCCACACACCTTCATTTTGATGTTCGGGTTTTTGTGTTAAGTTAATCTGTA	NM_004655
CUST_28_PI430048170	0.000135	3.33e-06	-1.23037	ncRNA	NR_037631	RefSeq	7745	8567	LOC100288911	uncharacterized LOC100288911		AGTGGTGGGTTTTCATTGTCTTCACTGATTGTCAATGCATTAATAAAGAAGATGTGTGGT	NR_037631
CUST_60075_PI430048170	0.000165	4.5e-06	1.85976	ncRNA	lnc-KBTBD7-2:2	lncipedia	41261332	41263538			-	CCTACTCATATGCTTCAGTTAATTATATATGTTGAACAGGTAGGAAGCAGTGCTGTTTTT		lnc-KBTBD7-2:2
CUST_125860_PI430048170	0.000135	3.34e-06	-1.2325	mRNA	NM_007313	RefSeq	130713880	130887675	ABL1	ABL proto-oncogene 1%2C non-receptor tyrosine kinase%2C transcript variant b		TCTGGAAGAGCCCTTCAGCGGCCAGTAGCATCTGACTTTGAGCCTCAGGGTCTGAGTGAA	NM_007313
CUST_136604_PI430048170	0.000135	3.35e-06	-0.873143	mRNA	NM_015093	RefSeq	149318299	149411613	TAB2	TGF-beta activated kinase 1/MAP3K7 binding protein 2%2C transcript variant 1		GGCCTTGTTTTTCAGCTTCATCTGCAGTTCTATGTGAAGATTGATAAATCAGTTTTTACT	NM_015093
CUST_142642_PI430048170	0.000135	3.36e-06	-1.8055	mRNA	NM_001080425	RefSeq	103215091	103217200	BEX4	brain expressed%2C X-linked 4%2C transcript variant 2		TACCATCTGTATAAAAACACCTTGGGGGCAGGCAGGGGCATTTAAAAATGTAGGACCTAT	NM_001080425
CUST_26142_PI430048170	0.000135	3.36e-06	-1.62597	ncRNA	ENST00000445227	ENSEMBL_GENCODE	33654659	33676724	RP11-141M1.3			CTGCACCATGGCAGAAGAGTTTGCAGAAATGTACCTGTTTTACTTTTCAATAGATTATAT		ENST00000445227
CUST_53248_PI430048170	0.000136	3.37e-06	-1.57596	ncRNA	NR_047525	RefSeq	827797	859446	LINC01128	long intergenic non-protein coding RNA 1128%2C transcript variant 8		GCTCTCTATTAAGTTGAGAAAATGGGAACTTCAGGTGATCATGTGAGATATTCAAGTTAA	NR_047525
CUST_14145_PI430048170	0.00944	0.00116	1.85906	ncRNA	ENST00000447111	ENSEMBL_GENCODE	202178660	202179391	AC079354.5		+	CTTGGATAATATGTAACATTAACAGAGAGCAGAAGCTGATTAAAGTATCTTGGTGCCAAA		ENST00000447111
CUST_134586_PI430048170	0.000136	3.38e-06	-0.742408	mRNA	NM_020738	RefSeq	8728856	8837625	KIDINS220	kinase D-interacting substrate%2C 220kDa		TCAGGTGAGTAGTTGCCGCGTAATATCATTGGAGTACATTCTTTATACTGTTTGTGAAAT	NM_020738
CUST_131828_PI430048170	0.000136	3.38e-06	-3.91995	mRNA	NM_004411	RefSeq	95772505	96098424	DYNC1I1	dynein%2C cytoplasmic 1%2C intermediate chain 1%2C transcript variant 1		CAGTCTGACAAAAGTCTATGGTTCCTAAATATGACATCAGTGTTGCCAATAAAATGTTTC	NM_004411
CUST_66387_PI430048170	0.000711	3.5e-05	1.85849	ncRNA	ENST00000605570	ENSEMBL_GENCODE	111208015	111209117	MIR4435-1HG			TTCATTGACATCTTTTGGAGAAACTGACAAACCTGGACTTGACTTAATGCCTTTGGAACC		ENST00000605570
CUST_137868_PI430048170	0.000136	3.4e-06	-1.24876	mRNA	NM_178335	RefSeq	191329084	191398670	CCDC50	coiled-coil domain containing 50%2C transcript variant 2		ATAATGATGCCTGGTGTATTGAAATCCTCAATAAATACTGCCAAGTGTGGATCAGTTGGA	NM_178335
CUST_18823_PI430048170	0.00089	4.77e-05	1.85629	ncRNA	ENST00000418567	ENSEMBL_GENCODE	81845185	81933480	RP11-379B8.1		-	ACACTTGAGAAAAGCACAGTTCTCTGTCTTACTCTTACTCTAAACTTGGAGATAAATGCA		ENST00000418567
CUST_114007_PI430048170	0.000136	3.4e-06	-2.50282	ncRNA	NR_038346	RefSeq	79452956	79471208	MAGI2-AS3	MAGI2 antisense RNA 3%2C transcript variant 4	-	ATCCATTTTAAAGGATTAATCTGAGGGACCCACAGACACTTAACACAATCAAATCTCAGA	NR_038346
CUST_131263_PI430048170	0.000137	3.41e-06	1.0998	mRNA	NM_006347	RefSeq	42658376	42676758	PPIH	peptidylprolyl isomerase H (cyclophilin H)		AGAGACCATGGAAGTGTCAGAGATTCAGAATCCAAGATTGTCTTTAAGTTTTCAACTGTA	NM_006347
CUST_127057_PI430048170	0.000137	3.41e-06	-1.74134	mRNA	NM_199165	RefSeq	104729890	104747311	ADSSL1	adenylosuccinate synthase like 1%2C transcript variant 1		ACATGGTTGCGTGTCCAGCCGAAGCAGTGTAATAAACATCTCCAATGGCCACTGAAAAAA	NM_199165
CUST_144912_PI430048170	0.000137	3.42e-06	1.33078	mRNA	NM_002901	RefSeq	32090930	32105726	RCN1	reticulocalbin 1%2C EF-hand calcium binding domain		TAGCATAAAACAGTGGGGTTGGATCCCATGAATAACATTATAAAGGTTCTGGGGTTTTTT	NM_002901
CUST_54666_PI430048170	0.000137	3.42e-06	-0.951098	ncRNA	lnc-PDE4DIP-2:5	lncipedia	149031148	149032144			+	TTACAGGATTGCCTCTGTAAAGCCTTATTCCTGTCCCAGAAAAGGTGAAATCCCTAAGGG		lnc-PDE4DIP-2:5
CUST_142598_PI430048170	0.000137	3.42e-06	1.87174	mRNA	NM_006892	RefSeq	32762384	32809356	DNMT3B	DNA (cytosine-5-)-methyltransferase 3 beta%2C transcript variant 1		CCTTTGGAGATTTTTTAATCCTTTTTTATTCCATAAGAAGTCGTTTTTAGGGAGAACGGG	NM_006892
CUST_142205_PI430048170	0.000137	3.42e-06	-1.27659	mRNA	NM_001040432	RefSeq	28349148	28525141	ZCWPW2	zinc finger%2C CW type with PWWP domain 2		GGCCCTTTGTTCAAAAATGGATAACTTAAAATGGCTGGCCAAGCTATTATAATTCTCAGA	NM_001040432
CUST_70450_PI430048170	0.000137	3.43e-06	0.919992	ncRNA	lnc-BMPR2-3:1	lncipedia	202635488	202725232			+	GGCAGCAAGGATTTGTCGTTTTCCATTGATTTCTTTTTTCTTTTTGGCTTCTGAAATAAC		lnc-BMPR2-3:1
CUST_52571_PI430048170	0.000137	3.43e-06	-3.47439	ncRNA	NR_003679	RefSeq	173530457	173541830	HAND2-AS1	HAND2 antisense RNA 1 (head to head)	+	ATATTGAAGAATCTCTAACCAGGGACACCAGTCCCTACGAAGACCTTGGGCGATTTTGAA	NR_003679
CUST_105992_PI430048170	0.000137	3.43e-06	1.59267	mRNA	NM_000234	RefSeq	48115444	48170603	LIG1	ligase I%2C DNA%2C ATP-dependent%2C transcript variant 1		TGGCTTACTCCGGAGTCTGGGATTCATCCCGTCATTTCTTTCAATAAATAATTATTGGAT	NM_000234
CUST_24181_PI430048170	0.000192	5.7e-06	1.85365	ncRNA	ENST00000533697	ENSEMBL_GENCODE	78015715	78016495	RP11-7I15.3		-	GTGGAAAGTCCTTAAACGAGTGATCAATATTTAGTGGCAAGACTCTAGACCAACCCTGGA		ENST00000533697
CUST_19666_PI430048170	0.000137	3.45e-06	0.981262	ncRNA	ENST00000608314	ENSEMBL_GENCODE	32845394	32846061	RP11-265E18.1			TAGCAGGTTCCATAGGTGTGACAAAACAGCATTAAAGCTCAGTATTTTGCATATTTTTAG		ENST00000608314
CUST_117592_PI430048170	0.000137	3.45e-06	-2.2003	ncRNA	lnc-LYZL1-10:1	lncipedia	29494347	29495708			-	TATTCCAAAATGAACGGTGGAGACGTGGGAAAACATGTCCATGACACGTTAACTTGGGCA		lnc-LYZL1-10:1
CUST_129940_PI430048170	0.000137	3.45e-06	1.44642	mRNA	NM_001005735	RefSeq	28687742	28741834	CHEK2	checkpoint kinase 2%2C transcript variant 3		GGAATAATTGCTTTTTCACAGTCACTGATGTACAATTAAAAACCTGATGGAACCTGGAAA	NM_001005735
CUST_112541_PI430048170	0.000137	3.45e-06	0.593554	mRNA	NM_014660	RefSeq	10973871	11107749	PHF14	PHD finger protein 14%2C transcript variant 2		ATTCCAAATATGGTGCCAAGGAGTGTAGCTTTTGTGAAGACCCTCGCTTTGCTAGAACTG	NM_014660
CUST_112132_PI430048170	0.0188	0.00295	1.85314	ncRNA	NR_026868	RefSeq	92809610	92838457	ANKRD19P	ankyrin repeat domain 19%2C pseudogene	+	TCCCACCATGCAAATATTGAAGCACTAAACGAGGAGGGAAACACTCCACTTTTGTTTGCT	NR_026868
Mouse-PGK1_5	0.000138	3.47e-06	1.12984											CONTROL
CUST_12993_PI430048170	0.000138	3.47e-06	-2.8033	ncRNA	NR_110156	RefSeq	66574029	66695588	LOC100507073	uncharacterized LOC100507073		TGGAACAGAGAGATTGCATTCTTACCCAAATACTCTTCGTGATTGCCTGCTTTGCGGCTT	NR_110156
CUST_94470_PI430048170	0.0108	0.00138	1.85196	ncRNA	lnc-C6orf195-25:1	lncipedia	1986679	1988615			-	GTGGAGAGATAAGCAAAACTAATGGCATGCTTAAAGCTTTGTGACAGAGGTTTGGAGTCA		lnc-C6orf195-25:1
CUST_70381_PI430048170	0.000138	3.49e-06	0.907771	ncRNA	lnc-SF3B1-2:1	lncipedia	197379700	197380892				TATCAGGAAAGTGGTCTGAGGTGGTAGCAAGATTCCACAGAAAAAAGTAAAACTTGCTGC		lnc-SF3B1-2:1
CUST_125455_PI430048170	0.012	0.0016	1.85184	ncRNA	lnc-SLCO5A1-1:1	lncipedia	69667048	69670314			-	CGTGTGTTTAATGAAATCTGTTGTCGATGTACTAATCTTGGTTTACAGCATCTTGAATAC		lnc-SLCO5A1-1:1
CUST_127996_PI430048170	0.000138	3.5e-06	0.871414	mRNA	NM_004935	RefSeq	151053811	151057965	CDK5	cyclin-dependent kinase 5%2C transcript variant 1		CACTCCCTTTGTGGACTTTATTTAATTTCATAAATTGGCTCCTTTCCCACAGTCAAAAAA	NM_004935
CUST_110471_PI430048170	0.000139	3.51e-06	-2.35544	mRNA	NM_020633	RefSeq	57455173	57456739	VN1R1	vomeronasal 1 receptor 1		TGGTTGTCATGCCATGAGTCTTTTCTCTTCATGGAATTCAGCTATTTATCATAACTCTTG	NM_020633
CUST_37650_PI430048170	0.000139	3.51e-06	-1.95433	ncRNA	ENST00000538202	ENSEMBL_GENCODE	5023682	5025594	RP11-429A20.4		+	GGAGGGACTCTCTTATTCTTGATGTTCCCCACACCTGGAATTTCAATAAACATCTCAATA		ENST00000538202
CUST_47264_PI430048170	0.000139	3.52e-06	-2.73829	ncRNA	lnc-ZEB2-1:3	lncipedia	144523563	144524416				GGTCGAATAATTCCTCTAGATGAAAGATCAGTTTCATTTCAAAACGAGAATAGGTTCCTT		lnc-ZEB2-1:3
CUST_67938_PI430048170	0.000139	3.52e-06	-2.23723	ncRNA	lnc-SOHLH2-2:3	lncipedia	36304450	36312411			-	TTAAATAAAAACCAGATACGGATATAATGCAGGAGAAGCTACCCACCATGCGGTGGATTC		lnc-SOHLH2-2:3
CUST_139321_PI430048170	0.00014	3.54e-06	0.849756	mRNA	NM_006014	RefSeq	154477768	154479257	LAGE3	L antigen family%2C member 3		GGCCTCATGTTTTATCTGGTTCTTAAATGTTTGTTACTACAGAAAATAAAACTGCGCTAC	NM_006014
CUST_15339_PI430048170	0.00014	3.55e-06	-2.99487	ncRNA	NR_027038	RefSeq	152262615	152269626	MBNL1-AS1	MBNL1 antisense RNA 1%2C transcript variant 1	+	CCTTCTAGTTTGTAAATAATATTTGTAATTTACAGGCCACTGTATTCCCAACTTTGCACC	NR_027038
CUST_126967_PI430048170	0.00014	3.55e-06	0.939505	mRNA	NM_001201483	RefSeq	8860999	8871576	ENO1	enolase 1%2C (alpha)%2C transcript variant 2		ATTGGCCCAAGTCATTGTTTTTCTCGCCTCACTTTCCACCAAGTGTCTAGAGTCATGTGA	NM_001201483
CUST_122590_PI430048170	0.0171	0.00259	1.85013	ncRNA	ENST00000565519	ENSEMBL_GENCODE	32236688	32238578	RP11-384L8.1		+	CAAGCATTATGCATGACATTTAGTGAACGTAAAAGACGGAGTCTAGACAACTTTATTTCC		ENST00000565519
CUST_139816_PI430048170	0.000141	3.58e-06	0.756706	mRNA	NM_005034	RefSeq	100150610	100154002	POLR2K	polymerase (RNA) II (DNA directed) polypeptide K%2C 7.0kDa		TGATGCTCGATGAATGCTGGGAATTCAGAGGAATGTCTTCACTTATACTTGGATTTGCTC	NM_005034
CUST_15072_PI430048170	0.000141	3.58e-06	-2.71813	ncRNA	NR_109779	RefSeq	112596793	112601969	LINC01279	long intergenic non-protein coding RNA 1279	+	GGACCCCCGATGTCATCTGTATTCTCTTTTTCTTCTTGTACTATATCCTTTGCCTGTAAA	NR_109779
CUST_134721_PI430048170	0.000141	3.58e-06	-1.58021	mRNA	NM_001134438	RefSeq	111859179	111976517	PHLDB2	pleckstrin homology-like domain%2C family B%2C member 2%2C transcript variant 1		CTCTGACATCATATTGTTGTCTGTTTACACAGATACATTTATTGCTGGGGATTGCAAAAA	NM_001134438
CUST_109360_PI430048170	0.000141	3.59e-06	-1.29881	mRNA	NM_005734	RefSeq	33257321	33357022	HIPK3	homeodomain interacting protein kinase 3%2C transcript variant 1		AGGAATGAAGTCTAAAGAAGCCAGAAAATACATTTTCAACAGTCTGGATGATGTAGCGCA	NM_005734
CUST_127677_PI430048170	0.000141	3.6e-06	-2.83629	mRNA	NM_003182	RefSeq	97731958	97740472	TAC1	tachykinin%2C precursor 1%2C transcript variant beta		CTCCTGACAGTCTTGTGCTTTTCCTATTTGTTTTCATGGTGAAAATGTACTGAGATTTTG	NM_003182
CUST_140745_PI430048170	0.000141	3.6e-06	-2.32549	mRNA	NM_003948	RefSeq	75576493	75630537	CDKL2	cyclin-dependent kinase-like 2 (CDC2-related kinase)		GCACTAGAAGAGGGTGCTTAACACTCCTCTATCTATATGAATAAAAAATTATGTTCTCAC	NM_003948
CUST_12842_PI430048170	0.000142	3.61e-06	-1.90068	ncRNA	ENST00000479311	ENSEMBL_GENCODE	46816668	46819458	LINC01118			TCTAGCGCTGATGGAAAACAGCCTTATATCACTAAGTGTGGACAATAACCCCTTCAGGCT		ENST00000479311
CUST_126920_PI430048170	0.000142	3.61e-06	1.5885	mRNA	NM_145715	RefSeq	89112816	89114901	TIGD2	tigger transposable element derived 2		CAGTTTGGATTACTTAAATTACAACTCTTTAATGTTGACTCTAGTCATTGGGCATTGACG	NM_145715
CUST_145747_PI430048170	0.000142	3.62e-06	-1.92366	mRNA	NM_015033	RefSeq	129887186	130043194	FNBP1	formin binding protein 1		GAAACGCAGTGAAAGGGAGGAACTTGTCCTTTACCCAGTTTTTCCTTTGTAGGATGGGAA	NM_015033
CUST_35829_PI430048170	0.000142	3.62e-06	0.864507	ncRNA	ENST00000384544	ENSEMBL_GENCODE	214846947	214847081	SNORA70			TTGGTAGTGTACACAGCCTGTTGGTTGTATGGGTTGCTCTGAGGGACCTTGGAGACAGGC		ENST00000384544
CUST_105279_PI430048170	0.000142	3.63e-06	-1.2935	mRNA	NM_002184	RefSeq	55935096	55994993	IL6ST	interleukin 6 signal transducer%2C transcript variant 1		GAAATTGAAGCCATAGTCGTGCCTGTTTGCTTAGCATTCCTATTGACAACTCTTCTGGGA	NM_002184
CUST_122038_PI430048170	0.0034	0.000295	1.84803	ncRNA	NR_038240	RefSeq	5431956	5445748	LINC00658	long intergenic non-protein coding RNA 658%2C transcript variant 2		AGGCAAGGTTGTTTGTGCATTAGTGAAATCAGACGTATTAAATAAAGTACCACATTGATC	NR_038240
CUST_125070_PI430048170	0.000142	3.63e-06	0.646624	ncRNA	NR_002822	RefSeq	97966595	97972326	MGC72080	MGC72080 pseudogene	-	TATTGAATATCAAGAGGAGGAGTTGTTGGACAAGGTTTATAGCTCGGTGCTGCAGCAGTG	NR_002822
CUST_27611_PI430048170	0.000142	3.63e-06	-1.86835	ncRNA	NR_022009	RefSeq	25135641	25138053	PWAR1	Prader Willi/Angelman region RNA 1		AATGGTTACAGTCTACTTCTGTGTGTAGTCTCCAAACACTCAGAAACCTCAAAATTTAAA	NR_022009
CUST_31591_PI430048170	0.000142	3.63e-06	-1.93184	ncRNA	ENST00000623380	ENSEMBL_GENCODE	44986109	44989203	RP11-693M3.1		+	TGATAATGGAGAAGGAGAAAAGTCAGTGGGTCATTGTGTATTGACGTTGGGATTAAAATA		ENST00000623380
CUST_137282_PI430048170	0.000143	3.66e-06	0.590407	mRNA	NM_025187	RefSeq	67110011	67148539	C16orf70	chromosome 16 open reading frame 70		TCCTGTATAGTTTAATGATGAATGTGCAGGGGACCTGTCTCAGGCTCCTATATGGTTCCT	NM_025187
CUST_145236_PI430048170	0.000143	3.66e-06	1.23421	mRNA	NM_138410	RefSeq	32391670	32454841	CMTM7	CKLF-like MARVEL transmembrane domain containing 7%2C transcript variant 1		CTTTGTTACCAGTGTGCATGTGTTTGTGTGTTTTTTAATAAAATATTGACTCGGCCAGTT	NM_138410
CUST_115535_PI430048170	0.000143	3.66e-06	1.43303	mRNA	NM_002518	RefSeq	100820150	100996825	NPAS2	neuronal PAS domain protein 2		GAAGGACTGGGTCAGAGATCTGTTGGAGAGAGAGAATAAAGAGATTATTTTTCATTATTT	NM_002518
CUST_64149_PI430048170	3.42e-05	3.91e-07	1.84788	ncRNA	ENST00000606242	ENSEMBL_GENCODE	782755	784948	AC006273.5			TCTTCCGGAATTCTCTACAATATCTGGAAGTGACCAAGAAAATTCCAGAACCCGGAGGCT		ENST00000606242
CUST_61521_PI430048170	0.000143	3.67e-06	1.4091	mRNA	NM_001005735	RefSeq	28687742	28741834	CHEK2	checkpoint kinase 2%2C transcript variant 3		ACCGTGCTGTGGACTGCTGGAGTTTAGGAGTTATTCTTTTTATCTGGACTCAAGTGTCAC	NM_001005735
CUST_126046_PI430048170	0.000143	3.68e-06	-2.77351	ncRNA	lnc-NHSL2-2:1	lncipedia	72150883	72153285			+	CTTGCTACCAGCAATTGAACTGTATTCTTTATATAGCTAGAGCTGTTTGTGTCTTCTTAA		lnc-NHSL2-2:1
CUST_88613_PI430048170	0.000143	3.68e-06	1.19184	mRNA	NM_014502	RefSeq	60890547	60906589	PRPF19	pre-mRNA processing factor 19		TAACAACTTTGAGGTAAAGTCACTGATCTTTGACCAGAGTGGTACCTACCTGGCTCTTGG	NM_014502
CUST_127298_PI430048170	0.000144	3.7e-06	-4.0487	mRNA	NM_020724	RefSeq	140865570	141133462	RNF150	ring finger protein 150		GGTGCTGAGAATGAAAATCTAAATGATTGAAGTTTTAAGTCCAAGTAGGAGTTGGTTTGT	NM_020724
CUST_31842_PI430048170	0.000144	3.71e-06	-0.997663	ncRNA	ENST00000622010	ENSEMBL_GENCODE	76805151	76805736	RP11-162A12.4			ACGCTGGCAAAGTCTGCTTTGTTTTATTGTGACACATGGAACATTATGGATTTTGGTGAA		ENST00000622010
CUST_75081_PI430048170	0.00305	0.000256	1.84747	ncRNA	lnc-CASP3-2:3	lncipedia	184695128	184698096			-	GTACTTACAACCTCAGTTTCACCACGATAGGCTGGTACATTTTATTATTTGTCACTTATT		lnc-CASP3-2:3
CUST_133518_PI430048170	0.000144	3.72e-06	0.981131	mRNA	NM_002389	RefSeq	207752037	207795516	CD46	CD46 molecule%2C complement regulatory protein%2C transcript variant a		CCGTTTCACATGCTTTTCAAGAATGTCGCAATTACTAAGAAGCAGATAATGGTGTTTTTT	NM_002389
CUST_120498_PI430048170	0.000145	3.73e-06	-4.33895	mRNA	NM_001018020	RefSeq	63042638	63071914	TPM1	tropomyosin 1 (alpha)%2C transcript variant Tpm1.3		CTGGAGGAGCTGCACAAGGCGGAGGACAGCCTCCTGGCCGCCGAAGAGGCCGCCGCCAAG	NM_001018020
CUST_127039_PI430048170	0.000145	3.75e-06	-2.08669	mRNA	NM_014292	RefSeq	38861426	38872334	CBX6	chromobox homolog 6%2C transcript variant 1		ATTGTATCAACGCCAGGAAAGGGGGGTGAAAAGCCTCTTTTACCCCCCAAATAAATTGTC	NM_014292
CUST_14352_PI430048170	0.0301	0.00561	1.8452	ncRNA	ENST00000463534	ENSEMBL_GENCODE	233012892	233015884	AC106876.2		-	AATTTTGGCTGTTTCCTGCAACCTATCATCAGATGCCACACTTATGAGACCCTCATCCTT		ENST00000463534
CUST_113140_PI430048170	0.000732	3.65e-05	1.84418	ncRNA	lnc-CCDC144NL-4:1	lncipedia	20789216	20789595			+	TAAAAAATACTCAGGTCTTGAGAATCCCTGTGCTGAAGGATCCCAAAATGCTTTCTAAAA		lnc-CCDC144NL-4:1
CUST_135636_PI430048170	0.000146	3.78e-06	-1.66115	mRNA	NM_001678	RefSeq	7650889	7657771	ATP1B2	ATPase%2C Na+/K+ transporting%2C beta 2 polypeptide%2C transcript variant 1		CTCTCTCTGCAGTTATTTAATGCCTGTGTCAGATCTACTGTAAAAAGAGGATTAAGTAAA	NM_001678
CUST_31322_PI430048170	0.0116	0.00153	1.8438	ncRNA	NR_034100	RefSeq	6925473	6929869	LINC00668	long intergenic non-protein coding RNA 668		TTCTCTCTTTAAACAATACAAGGTTGGCTTCCATGGTTCCTTCTTAAAGAATGTTGAAGG	NR_034100
CUST_109095_PI430048170	0.000146	3.78e-06	-1.12364	ncRNA	lnc-CNIH3-2:4	lncipedia	224434911	224521972			-	CTAGCAATGGAGTGTTACAAGTAATAGACCCTAAAATGTGGATTGGCAAATTGCAGGTAG		lnc-CNIH3-2:4
CUST_53449_PI430048170	0.000146	3.78e-06	0.608695	mRNA	NM_021933	RefSeq	12019241	12032049	MIIP	migration and invasion inhibitory protein		TTTTCCTCCGAAGTCTGAGAAAAGCTCAGCCCCCAGGAACCTGGACCTCTGGTCCTCTGT	NM_021933
CUST_58504_PI430048170	0.000424	1.69e-05	1.84213	ncRNA	lnc-AC005841.1-1:1	lncipedia	2863748	2864710			-	GATAGATGGGCTAGGATTATTAAGGAAGATACACAAGGGAGGCAGGCCTTAGAAAGAGAT		lnc-AC005841.1-1:1
CUST_127557_PI430048170	0.000146	3.79e-06	3.07739	mRNA	NM_006033	RefSeq	49562030	49592908	LIPG	lipase%2C endothelial		GAAGCTTTGCAAATTGAATTCTCAGTGAGTTGTATATTTATACACCTGGCTTGAAGCCTT	NM_006033
CUST_18773_PI430048170	0.000146	3.79e-06	-2.38066	ncRNA	NR_121614	RefSeq	71407864	71420745	LINC00472	long intergenic non-protein coding RNA 472%2C transcript variant 4		TTGGATTTTAGCATTACTGATCTATAGCCTTGCAGGGGCTTAAGGATGGCAGCTGTCTCT	NR_121614
CUST_57632_PI430048170	0.000146	3.79e-06	-3.28023	mRNA	NM_012202	RefSeq	62707593	62709206	GNG3	guanine nucleotide binding protein (G protein)%2C gamma 3		TTGCTCTCAGTCTCACCTGGAGCTACTGGGAGGGTAAAGCCATTTGAAGAATAAAGTCAT	NM_012202
CUST_100520_PI430048170	0.000146	3.8e-06	-1.35679	mRNA	NM_032854	RefSeq	29614755	29621423	CORO6	coronin 6		CTGCCGTTGCCTCTCTCAGAAAAACAAGACGTACTGAATGAAATATTTTACTAAGCGTTC	NM_032854
CUST_135394_PI430048170	0.000147	3.81e-06	-1.0359	mRNA	NM_001145195	RefSeq	17951838	18043292	SLC39A12	solute carrier family 39 (zinc transporter)%2C member 12%2C transcript variant 1		GTAGAATTTAAAGTGGACAGATGCCTGTTGGAGTAAAATCAACTGCAACTTTTTGATGTT	NM_001145195
CUST_31198_PI430048170	0.000147	3.82e-06	-0.78407	ncRNA	ENST00000572343	ENSEMBL_GENCODE	83144131	83177607	AC139099.4			AACTGAGAAGCAAAGACACCCAGGAGGCAAGGCTGCAGTCATTTAGGAGAGTGGACGGAT		ENST00000572343
CUST_112181_PI430048170	0.000147	3.82e-06	-0.901117	mRNA	NM_001291815	RefSeq	130265878	130434123	HMCN2	hemicentin 2		ATCCGGTCAGGACCACCTGCAGTGAACGTCTCAGTGAACCAGACAGCCCTGCTGCCTTGC	NM_001291815
CUST_13420_PI430048170	4.59e-05	6.26e-07	1.83954	ncRNA	ENST00000443467	ENSEMBL_GENCODE	111239824	111495048	MIR4435-1HG		-	TATTCAAGATGTGTACCATGTGATGGCCAAGGGAGCTTCATCAATCATGGCATCTCAAGG		ENST00000443467
CUST_19536_PI430048170	1.04e-05	6.44e-08	1.83628	ncRNA	ENST00000418442	ENSEMBL_GENCODE	20007105	20131719	AC005062.2			AGACCAGGTGGAGGAAAGTCATCCACTAATCAGGAGCCCTTTTATGGAATCTACGTAAAC		ENST00000418442
CUST_24673_PI430048170	0.000148	3.86e-06	-1.91879	ncRNA	ENST00000538202	ENSEMBL_GENCODE	5023682	5025594	RP11-429A20.4		+	AGGGACTCTCTTATTCTTGATGTTCCCCACACCTGGAATTTCAATAAACATCTCAATAAA		ENST00000538202
CUST_128627_PI430048170	0.000149	3.88e-06	1.0712	mRNA	NM_016640	RefSeq	44808924	44815516	MRPS30	mitochondrial ribosomal protein S30		CACTTTCTACTGAATAGACCAAAAGAAGAAAAATCACAGCTGTTGGAAAACTGAAAAAGC	NM_016640
CUST_35440_PI430048170	0.00013	3.17e-06	1.83559	ncRNA	ENST00000390962	ENSEMBL_GENCODE	23396446	23396516	SNORD65		-	TCACCCAAAATAGCTGGAATTACTGGCAGATTGTGTAGCAATAAACCTAGTTTTCTGAAG		ENST00000390962
CUST_121776_PI430048170	0.000149	3.89e-06	-1.81127	mRNA	NM_014795	RefSeq	144384374	144520391	ZEB2	zinc finger E-box binding homeobox 2%2C transcript variant 1		CATGTAAAAACATTCAAACAAACACACTCAGCGGATTTATTTATTGTGCAATGGGGCAAT	NM_014795
CUST_55575_PI430048170	0.000149	3.9e-06	0.818127	ncRNA	lnc-TP53BP2-5:1	lncipedia	223644109	223644383			-	ACTGGGTTGGATCATGCTAAAAGGAGATAATATTACTCGGGTACATAGTGTCTCCAACTA		lnc-TP53BP2-5:1
CUST_143485_PI430048170	0.000149	3.91e-06	0.661862	mRNA	NM_024100	RefSeq	984327	994570	WDR18	WD repeat domain 18		CGTCACAGTGGTGCTAGTCTGTTTTTAACAAAAGAGGATGAAAAGCCCCTCCTCTCCGGC	NM_024100
CUST_108103_PI430048170	0.000149	3.91e-06	-1.80614	mRNA	NM_201286	RefSeq	55484615	55489198	USP51	ubiquitin specific peptidase 51		CATGGGGTCATATATTGCTTCATGTGTAAGGATTATGTATATGACAAAGACATAGAACAG	NM_201286
CUST_53136_PI430048170	0.000149	3.91e-06	1.84701	mRNA	NM_004260	RefSeq	144511283	144517826	RECQL4	RecQ protein-like 4		AGAAAATACCTGCACCTGAGCTTCCATGCCCTGGTGGGCCTGGCCACGGAAGAGCTCCTG	NM_004260
CUST_111815_PI430048170	3.27e-07	2.9e-10	1.83317	ncRNA	lnc-SRRM3-4:3	lncipedia	76174308	76177205			-	TTCTGGAGGCCAGCAACAGCATCCAGTTTGTCATCAAGAGGTAAGGCCCGACCAGGTCCA		lnc-SRRM3-4:3
CUST_122710_PI430048170	0.00285	0.000234	1.83032	ncRNA	NONHSAT090840	NONCODE	99326376	99326552				GTATTTGTTGGAGGCAGATATTAAACTTTTCCAGAAATACTTTTGGGATAGGTCCTTTCT		NONHSAT090840
CUST_136642_PI430048170	0.00015	3.93e-06	1.44291	mRNA	NM_176817	RefSeq	141972630	141973773	TAS2R38	taste receptor%2C type 2%2C member 38		TGAGAATGGACATGAAATGAGCTCTTCATTAATACGCCTGTGAGTCTTCATAAATATGCC	NM_176817
CUST_50235_PI430048170	0.0194	0.00311	1.82768	ncRNA	NR_122113	RefSeq	15784953	15827434	DUXAP8	double homeobox A pseudogene 8		ATTGAAAATCCTCATCAATACCTTCACTCAAAAACCTTACCCAGGTTATGCTACCAAACA	NR_122113
CUST_29006_PI430048170	0.00269	0.000216	1.82732	ncRNA	ENST00000443373	ENSEMBL_GENCODE	26584755	26594813	AC002331.1			GTGTGGAGCACTTCCTTCTGCTGATGAACATGTGCTATGAAAAATAAACTTATTTTGTTT		ENST00000443373
CUST_128581_PI430048170	0.000151	3.97e-06	1.27671	mRNA	NM_004085	RefSeq	101345655	101348969	TIMM8A	translocase of inner mitochondrial membrane 8 homolog A (yeast)%2C transcript variant 1		GCATGCCTAATGTTAGTTAGTGTAGATTCCATTTACTGCATTCTTCTGATCACTGAAATA	NM_004085
CUST_143198_PI430048170	0.000152	4e-06	-0.768665	mRNA	NM_005392	RefSeq	93576626	93679587	PHF2	PHD finger protein 2		TCCCAATTCATATTACTCTTGTATCGAGTCCATGAGGTCTAAGGCAACTTAGATCAAAGT	NM_005392
CUST_93724_PI430048170	0.00217	0.000161	1.82588	ncRNA	ENST00000422971	ENSEMBL_GENCODE	45604432	45605621	CTA-941F9.9			GAGGTTTCACTTCTTGTCCACACAAGACTTTAATAAAATGTGGCATCTAACTGAATAAAG		ENST00000422971
CUST_45604_PI430048170	0.00046	1.88e-05	1.82505	ncRNA	NR_125841	RefSeq	53628379	53631394	LINC01564	long intergenic non-protein coding RNA 1564		CAGTTCTTTCTGTGCTAGTATTGGGGAAATATATTTTTGGCTGCATGCAAAATGGTAAAA	NR_125841
CUST_122325_PI430048170	0.0111	0.00145	1.82056	ncRNA	ENST00000440379	ENSEMBL_GENCODE	38913169	38915148	AF064858.6			ATTCCTCCGAATGGAGCCTTGGCCAGAGCAAGGCGTGCCGTGTAGAGGAGCGGATCTGAG		ENST00000440379
CUST_103915_PI430048170	0.000153	4.02e-06	0.482378	ncRNA	lnc-MPP4-4:1	lncipedia	201765382	201780911			-	GTCCTGGTGGTTGTATGGGATAAACATGGATTTCTTTCTAGTTTGTCTTATATCAGTTTT		lnc-MPP4-4:1
CUST_55034_PI430048170	0.000153	4.02e-06	-1.97028	ncRNA	lnc-PBX1-3:3	lncipedia	164626035	164682483			+	TATTTCGAAAAAAGCCTGGTTTTGGTACAGCTCTTCCAGAACCCACGGGAAGAACCTGTT		lnc-PBX1-3:3
CUST_96023_PI430048170	0.000153	4.03e-06	0.860435	mRNA	NM_014060	RefSeq	120603888	120621161	MCTS1	malignant T cell amplified sequence 1%2C transcript variant 1		GTGTGTGACAGCATGAAGATAATGCCTGTGGTTATGCTGAATAAATTCACCAGATGCTAA	NM_014060
CUST_145239_PI430048170	0.000153	4.03e-06	-2.38419	mRNA	NM_006867	RefSeq	30384500	30572261	RBPMS	RNA binding protein with multiple splicing%2C transcript variant 4		CGGCTTATGTTGAAAATTTCAATGTCATGATTACCTGGTTGGTTTGGGTTTTTGTTTTGT	NM_006867
CUST_139889_PI430048170	0.000153	4.04e-06	0.984587	mRNA	NM_001326	RefSeq	33084583	33161491	CSTF3	cleavage stimulation factor%2C 3' pre-RNA%2C subunit 3%2C 77kDa%2C transcript variant 1		GCATTTTATCACATTTTCTGAAAACAATTGTTCTTGGTTTGCTTATGTAGAGTCCTGCCT	NM_001326
CUST_58235_PI430048170	0.000153	4.04e-06	-3.73701	mRNA	NM_001001522	RefSeq	117199323	117204792	TAGLN	transgelin%2C transcript variant 1		TCATCAAGACTGACATGTTCCAGACTGTTGACCTCTTTGAAGCAAAGACATGGCAGCAGT	NM_001001522
CUST_35058_PI430048170	0.015	0.00218	1.81713	ncRNA	ENST00000440570	ENSEMBL_GENCODE	134543337	134546632	MIR503HG		-	GGACATTGAATGACTGTATGCTGCTTTTGATTTCCGTTAATATGGGCAACTGTCCAATTA		ENST00000440570
CUST_128362_PI430048170	0.000153	4.06e-06	-3.43825	mRNA	NM_173800	RefSeq	115962453	116027602	LVRN	laeverin		GGCCACAGGTCATAGGTCAGAGAATTTTTTCTTCAAATGTAGAAATGTAAATTTTCAGCA	NM_173800
CUST_10491_PI430048170	0.00103	5.83e-05	1.81701	ncRNA	ENST00000435388	ENSEMBL_GENCODE	11099675	11102100	RP4-635E18.6		-	GCCCTTAATACAATTCATTCCACCCATTAAGTCTTCAATAAATGTTCAGCATATCCAGTT		ENST00000435388
CUST_50119_PI430048170	0.000154	4.07e-06	-2.11208	ncRNA	NR_111950	RefSeq	149607011	149679523	LINC00869	long intergenic non-protein coding RNA 869%2C transcript variant 6	+	GATCCTTGTCAGAAAACTTGCCACAGAATCAACCCCAATGCTCACTAACAAACTGAGAAG	NR_111950
CUST_134451_PI430048170	0.000154	4.08e-06	0.844261	mRNA	NM_003824	RefSeq	70203162	70207402	FADD	Fas (TNFRSF6)-associated via death domain		AAGCAGTCCTCTTATTCCTAAGGTAATCCTATTAAAACACAGCTTTACAACTTCCATACT	NM_003824
CUST_93965_PI430048170	0.000154	4.08e-06	0.879146	mRNA	NM_199189	RefSeq	139273751	139331677	MATR3	matrin 3%2C transcript variant 1		TCTACCTCCATCAGGACCCCAGATGTCTGACAGCCCTGTGTGACACCAAGATAAGTAACA	NM_199189
CUST_59325_PI430048170	0.000154	4.08e-06	0.941512	ncRNA	lnc-C12orf50-5:1	lncipedia	87820653	87820918				ATGGTGAACTTAAGGTGAAATCTAAGAAAAGGGAAGCTGTTGCAGGAAGAAGCTGAGGCA		lnc-C12orf50-5:1
CUST_110193_PI430048170	6.25e-05	1.02e-06	1.81624	ncRNA	lnc-C17orf72-1:3	lncipedia	64145979	64147434			+	TGTACTCATTTTATTGTGCCCCTATCTGAACAGGATTCCGTAGAAATGACTTAGATGCTT		lnc-C17orf72-1:3
CUST_133562_PI430048170	0.000155	4.1e-06	-1.79934	mRNA	NM_001206671	RefSeq	8106049	8169043	RIC3	RIC3 acetylcholine receptor chaperone%2C transcript variant 3		AAACAGGGCTTTTTTCCCCTTTATGAAAAAAGTACACAGAAGTGTTGAAACGATTCAAGT	NM_001206671
CUST_131485_PI430048170	0.000155	4.11e-06	0.970092	mRNA	NM_002690	RefSeq	42338454	42371813	POLB	polymerase (DNA directed)%2C beta		GGGTCTTTGGTGTTTTTAAATGATTGTTTCTTCTTCATGCTTTTGCTTGCAATGTAGTCA	NM_002690
CUST_40546_PI430048170	0.000155	4.13e-06	-1.82622	ncRNA	NR_121612	RefSeq	71407864	71420745	LINC00472	long intergenic non-protein coding RNA 472%2C transcript variant 1		TCAGGTACTCCACTGGGCATTTTCTCTTCATGGAGCTTATAGCAACAAAAGTGTTTTACA	NR_121612
CUST_58087_PI430048170	0.000156	4.16e-06	-2.93375	ncRNA	lnc-PGR-3:5	lncipedia	101041660	101051470			-	GTCGAGCTCACAGCGTTTCTATCAACTTACAAAACTTCTTGATAACTTGCATGATGTAAG		lnc-PGR-3:5
CUST_17011_PI430048170	0.00158	0.000104	1.81445	ncRNA	ENST00000624030	ENSEMBL_GENCODE	9498401	9498775	CTD-2201E9.3		-	GTAGCATCCATACAGTAGTCTGAGCAAGCTGAAGGATAACAAGCTTAAATTTATCTTTTA		ENST00000624030
CUST_63760_PI430048170	0.000156	4.17e-06	-2.07836	ncRNA	lnc-TUBB6-1:1	lncipedia	12308257	12329823			+	GGGGCCCAAAAGTTCAACCATATCATTCTTATCTAATACTTCTTTTTCTAACAACAGAAG		lnc-TUBB6-1:1
CUST_131503_PI430048170	0.000156	4.17e-06	-2.11708	mRNA	NM_003793	RefSeq	66563463	66568576	CTSF	cathepsin F		AGGAAACTTGTAACCACCCTTTTCTAACAGCAATAAAGAGGTGTCCTTGTCCCGAAAAAA	NM_003793
CUST_140917_PI430048170	0.000157	4.18e-06	0.995723	mRNA	NM_022451	RefSeq	94333225	94362976	NOC3L	nucleolar complex associated 3 homolog (S. cerevisiae)		GGAGTGGCCTAAGAAATGCGTGTTTCAGTGACTAGATTATAAATATTCTCTATTGTGAAT	NM_022451
CUST_112715_PI430048170	0.000157	4.18e-06	0.912314	ncRNA	lnc-ATP7B-1:1	lncipedia	52029022	52049898			+	CTTTTTTACAGTGGCCAAAGAAGATGAAGTTTTAACGGGCTCAAGCAGATCTGCAAGGCC		lnc-ATP7B-1:1
CUST_31276_PI430048170	0.000109	2.43e-06	1.81436	ncRNA	NR_119377	RefSeq	3603736	3610089	DLGAP1-AS2	DLGAP1 antisense RNA 2	-	AACATCGTGGCTGAATGAACAGCTGGGACTATGCTTAACCCATTCCCAGCTTATAAAAGC	NR_119377
CUST_60708_PI430048170	0.000126	3e-06	1.81339	ncRNA	lnc-FAM158A-3:4	lncipedia	24144799	24146578			-	GAGACTGTGCAGTATCCACTCTGTAACCTCAGAACCTACTGCTGTATTGGGTTCATAGTA		lnc-FAM158A-3:4
CUST_122087_PI430048170	0.0151	0.0022	1.8105	ncRNA	NONHSAT079261	NONCODE	30214797	30214976				AAAGATATTTCAAGATAGAAAGAGGACAGCTGTTGGTGGTTGCTGGATCCACTGGAGCAG		NONHSAT079261
CUST_111783_PI430048170	0.000123	2.9e-06	1.81001	ncRNA	lnc-ZNF680-43:1	lncipedia	63113634	63114805			-	TGAGCGCATCACGCAGCTGGAGCAGGAGAAGTCAGCACTCATTAAGCAGCTGTTTGAGGC		lnc-ZNF680-43:1
CUST_68459_PI430048170	0.000158	4.24e-06	-1.77897	ncRNA	lnc-RP11-817J15.3.1-6:1	lncipedia	103204910	103215891			+	GCCCTTCAAATGATCACAGTGTCAATGCAGGTAATGTTTAGAGTGACCACAAAAATGAAA		lnc-RP11-817J15.3.1-6:1
CUST_59935_PI430048170	0.000741	3.7e-05	1.80883	ncRNA	lnc-RASL11A-2:1	lncipedia	27429212	27435034			+	ATTTAGATCATTCAAAGCCAAGATGCCAAGATAAGGGGAACCAGAATGGCTTGTTGTGCA		lnc-RASL11A-2:1
CUST_138257_PI430048170	0.000159	4.26e-06	0.889734	mRNA	NM_003772	RefSeq	96389993	96393563	JRKL	JRK-like%2C transcript variant 1		TCATTTGTAGGAAACTGGGAAATAAAAACCTGGGGAACTTTAGGTTATTTATACAAAGGG	NM_003772
CUST_127730_PI430048170	0.000159	4.27e-06	2.10441	mRNA	NM_001282382	RefSeq	160421909	160428744	PTTG1	pituitary tumor-transforming 1%2C transcript variant 1		CTAAAGCTACTAGAAAGGCTTTGGGAACTGTCAACAGAGCTACAGAAAAGTCTGTAAAGA	NM_001282382
CUST_127179_PI430048170	0.000159	4.27e-06	-1.22874	mRNA	NM_020663	RefSeq	63204383	63293512	RHOJ	ras homolog family member J		CACAGGCTCCCAGGGGTCTTAAGAGCTAATTACTGAATAAAACAATCTAGAACAAAGCAA	NM_020663
CUST_85891_PI430048170	0.000159	4.28e-06	-1.52035	ncRNA	lnc-MTRR-10:1	lncipedia	7426083	7433149			+	ACAAGGCTGAGATACAAAAGAGATTTGGTGACTCGCCAAAAAACGTGTCCAGGCTGGAAA		lnc-MTRR-10:1
CUST_124839_PI430048170	0.000159	4.28e-06	-1.38573	ncRNA	lnc-FOXK1-4:1	lncipedia	3989960	3992976			+	CTGTCAGGTAAGAATTGTGAAAGACTTTGCAGTGTGCCATAAAAAGGATTACTGAGTGTC		lnc-FOXK1-4:1
CUST_69502_PI430048170	0.000159	4.29e-06	-1.97005	ncRNA	NR_040050	RefSeq	77546940	77565021	LOC100507351	uncharacterized LOC100507351	+	TACACTTTTAGGCTATTGAGAGTGAAAACAAGCACTGACATGAACACCCAACCAGCTGCC	NR_040050
CUST_108758_PI430048170	0.000159	4.29e-06	-1.90006	ncRNA	lnc-HDAC9-1:2	lncipedia	19000843	19002405			+	CAATGGTGTGTTCCAAATTATTGTTGGTGTTGTTAATGTCATGACTCTCCTTTGAATAGA		lnc-HDAC9-1:2
CUST_134186_PI430048170	0.00016	4.3e-06	-2.02636	mRNA	NM_014974	RefSeq	274189	689668	DIP2C	DIP2 disco-interacting protein 2 homolog C (Drosophila)		CTCCTACAGGGAAATGTATCTGACTCTGTTTACATAATTTGTTGCATTACTTAGTACAGA	NM_014974
CUST_97739_PI430048170	0.00016	4.31e-06	-1.82506	ncRNA	ENST00000493545	ENSEMBL_GENCODE	117678693	117690930	RP11-768G7.2			AAATCGACCTTGTTTGTACAGAAGTCTCAGCAGGAATAGGCAGATGCCTGTTTTTGCTGC		ENST00000493545
CUST_140437_PI430048170	0.00016	4.31e-06	0.739881	mRNA	NM_013393	RefSeq	2234290	2242198	FTSJ2	FtsJ RNA methyltransferase homolog 2 (E. coli)		GCTGGAAATTTATATCAGTGTCTGGGCTCCCAAGAACATAAATGTAATTGCCAAAGCAAA	NM_013393
CUST_78158_PI430048170	0.00016	4.32e-06	-2.11515	mRNA	NM_015204	RefSeq	11370434	11832198	THSD7A	thrombospondin%2C type I%2C domain containing 7A		GGTGGATTCCTCTAGTTGGTTTGTAATTGTTCTTTGAAGGCTGTTTATGACTAGATTTTT	NM_015204
CUST_80616_PI430048170	0.0147	0.00211	1.80829	ncRNA	lnc-AL139008.2-3:3	lncipedia	33533485	33541227				CTTCGAAATGACAATCAAGAAGCAGCAGCCATGAAGAATGAAAGTTTTAAAACACAAGGA		lnc-AL139008.2-3:3
CUST_90706_PI430048170	0.000161	4.34e-06	-1.91845	mRNA	NM_013443	RefSeq	127885320	127899648	ST6GALNAC6	ST6 (alpha-N-acetyl-neuraminyl-2%2C3-beta-galactosyl-1%2C3)-N-acetylgalactosaminide alpha-2%2C6-sialyltransferase 6%2C transcript variant 1		TTTACCATGGTGATCGCGGTGGAGTTGTGTGACCACGTGCATGTCTATGGCATGGTCCCC	NM_013443
CUST_141197_PI430048170	0.000161	4.34e-06	0.755073	mRNA	NM_001024	RefSeq	62387064	62388520	RPS21	ribosomal protein S21		CATCGTCTCAAAGAACTTTTGACTGGAGAGAATCACAGATGTGGAATATTTGTCATAAAT	NM_001024
CUST_51245_PI430048170	0.000161	4.34e-06	-2.61939	ncRNA	lnc-SLA2-2:1	lncipedia	36549126	36604529			+	GCCTTTCTTATCAATGGGTGCCTCCCGGTACATCTCGTCCACTTCCTCATCTGTGAAGCG		lnc-SLA2-2:1
CUST_133605_PI430048170	0.000161	4.35e-06	-3.24568	mRNA	NM_170677	RefSeq	36891020	37100140	MEIS2	Meis homeobox 2%2C transcript variant a		GCACGTGTTCCTCACTAGAAGAAAATGCTGTTACCTTTAAGCTTTGTCAAATTTACATTA	NM_170677
CUST_120773_PI430048170	0.000161	4.36e-06	1.0961	mRNA	NM_001258353	RefSeq	44850286	44899368	EFTUD2	elongation factor Tu GTP binding domain containing 2%2C transcript variant 3		TTCAATATCATGGACACTCCAGGACATGTGAATTTCTCTGATGAGGTCACAGCTGGCTTG	NM_001258353
CUST_42146_PI430048170	0.000255	8.41e-06	1.8066	ncRNA	ENST00000615483	ENSEMBL_GENCODE	20564708	20566835	RP11-476H16.1		-	AACCAAGATCCTTTAAATCCTGATGAACTCATCCGTAAAGCAGATGCCCAAAGGATGATA		ENST00000615483
CUST_82164_PI430048170	0.000162	4.38e-06	0.794698	mRNA	NM_019556	RefSeq	134887625	134915344	MOSPD1	motile sperm domain containing 1		GAATGTGGACTGCCTTTTATCTCTATTTCACTCCATTAACATGCAACAAACTATTGAATG	NM_019556
CUST_135242_PI430048170	0.000162	4.38e-06	-2.63147	mRNA	NM_001354	RefSeq	4987775	5018033	AKR1C2	aldo-keto reductase family 1%2C member C2%2C transcript variant 1		ACACCTGATTTCAGGAACACTTGAGATGTAAGAAAATTTTATAGGGACCTCCAATCACTA	NM_001354
CUST_73634_PI430048170	0.000162	4.39e-06	-1.03937	ncRNA	lnc-MBNL1-3:1	lncipedia	152243827	152300110			+	CTATAACTAAGCATAGAGGTTGGTACTAAGAAGTGCCTTTCCTGACGTCTCTGCTGCTTG		lnc-MBNL1-3:1
CUST_106498_PI430048170	0.000163	4.41e-06	-1.26033	mRNA	NM_001300829	RefSeq	1269265	1273172	CIRBP	cold inducible RNA binding protein%2C transcript variant 3		GAGGGTTTTCAAAACATTTTGAAAAGCATTTACTTTTTTGACCACGAGCCATGAGTTTTC	NM_001300829
CUST_51641_PI430048170	0.000163	4.42e-06	-2.00512	ncRNA	NR_111950	RefSeq	149607011	149679523	LINC00869	long intergenic non-protein coding RNA 869%2C transcript variant 6	+	AGAGATCCTTGTCAGAAAACTTGCCACAGAATCAACCCCAATGCTCACTAACAAACTGAG	NR_111950
CUST_135267_PI430048170	0.000163	4.42e-06	0.731244	mRNA	NM_025196	RefSeq	7060052	7068073	GRPEL1	GrpE-like 1%2C mitochondrial (E. coli)		CTGGCAAAATGGACTTTCTCAAAATAGGACTGCACGCTTGGTGTACTTTAAATGTTAATG	NM_025196
CUST_135395_PI430048170	0.000164	4.44e-06	1.65044	mRNA	NM_001287821	RefSeq	66505082	66549484	ZWILCH	zwilch kinetochore protein%2C transcript variant 2		CACATTAAAGATGAGCTTGTTAAAAAGGAAAGCATATTTCTCTGATTGCCCTTATGGAGA	NM_001287821
CUST_61251_PI430048170	0.000164	4.44e-06	-0.420343	ncRNA	lnc-CATSPERB-2:1	lncipedia	91812015	91813828			-	GTAATTGGCCCTCCATATCTTTGGGTTCCACATCTGTGGATTTAACCAACTGCACCTCAA		lnc-CATSPERB-2:1
CUST_36953_PI430048170	0.000164	4.44e-06	-2.40718	ncRNA	NR_029665	RefSeq	95085444	95085541	MIR27B	microRNA 27b	+	ATTGGTGAACAGTGATTGGTTTCCGCTTTGTTCACAGTGGCTAAGTTCTGCACCTGAAGA	NR_029665
CUST_135987_PI430048170	0.000164	4.46e-06	-0.587108	mRNA	NM_006609	RefSeq	127298668	127343229	MAP3K2	mitogen-activated protein kinase kinase kinase 2		GGCTTACTCTAATAAGTAACCTTCTGGACTATGGAATGAATATAAATGAATGGCACTTTG	NM_006609
CUST_131167_PI430048170	0.000165	4.48e-06	-1.00051	mRNA	NM_001171167	RefSeq	4967991	4987370	CAMTA2	calmodulin binding transcription activator 2%2C transcript variant 4		TTCTACTTGTGCATGGGCTTGGTTTATACGAATTGCCATTAAACATCGCTGCACCAGCCA	NM_001171167
CUST_49236_PI430048170	0.000165	4.49e-06	0.856122	ncRNA	ENST00000610036	ENSEMBL_GENCODE	105334027	105337475	RP11-332H14.2		+	TTTGTGGCAGGTGACTCTGAAGCAGAACTCTTGAGATGGAAGGATTGTCATCTGAGGAAA		ENST00000610036
CUST_19150_PI430048170	0.000165	4.49e-06	-4.69079	ncRNA	ENST00000573100	ENSEMBL_GENCODE	138377905	138383075	RP3-422G23.4			AGGGCAAAGCTTGGCAAATGCCAATCTGGTTAACCTATCTTCACATTCCTTAGGGGAAAG		ENST00000573100
CUST_68706_PI430048170	0.000165	4.5e-06	3.5073	mRNA	NM_024037	RefSeq	25834005	25859458	AUNIP	aurora kinase A and ninein interacting protein%2C transcript variant 2		TTCCCACAAGATAGGAGGGAATCCCCTTTGTAAAACTATGAATCCAAATAAATGTTTACA	NM_024037
CUST_46814_PI430048170	0.000581	2.63e-05	1.80251	ncRNA	lnc-FAM123A-3:3	lncipedia	24885289	24886079			-	CTTAACTAATGGATAAAGGACAGCAGTTCACAGGATATGAACTAAGGAAATGTGTGATCA		lnc-FAM123A-3:3
CUST_137962_PI430048170	0.000166	4.52e-06	-3.15459	mRNA	NM_015886	RefSeq	74824536	74855029	PI15	peptidase inhibitor 15		GTGTGTACATATATAAAACCTGTGTAAACCTCTGTCCTTATGAACCATAACAAATGTAGC	NM_015886
CUST_98678_PI430048170	0.000166	4.54e-06	-3.18054	mRNA	NM_053025	RefSeq	123612295	123884302	MYLK	myosin light chain kinase%2C transcript variant 1		TTATACAAGTGTGTAGCCAAGAATGACGCTGGCCAGGCGGAGTGCTCCTGCCAAGTCACC	NM_053025
CUST_100541_PI430048170	0.000166	4.55e-06	0.593379	mRNA	NM_017892	RefSeq	152651592	152717461	PRPF40A	PRP40 pre-mRNA processing factor 40 homolog A (S. cerevisiae)		AATATGCCTCCTGTACCTCATGGAATGATGCCGCAGATGATGCCCCCTATGGGAGGGCCA	NM_017892
CUST_60577_PI430048170	0.000166	4.55e-06	1.12323	mRNA	NM_007111	RefSeq	113584740	113641473	TFDP1	transcription factor Dp-1%2C transcript variant 1		GTATTTCAACCACATCCATGAAAATAAAACACCTCCTGTTGTGGATGGTGAGCCCCTGAT	NM_007111
CUST_111848_PI430048170	0.000168	4.59e-06	0.626415	ncRNA	lnc-TRIP6-3:1	lncipedia	100887001	100887496			+	TTAGGTCTTGGACAAGCTCCTCCTTTACCTGCGCATCGTGCATTCCTTGGATTATTACAA		lnc-TRIP6-3:1
CUST_39877_PI430048170	0.000168	4.6e-06	-0.611973	ncRNA	lnc-TMED5-1:21	lncipedia	93311279	93337437				TAAAATAGTGCTTTCACTTAGAAAAGGCGCGGTGGCTCATGCCTCTAATAGGTGGCTGTA		lnc-TMED5-1:21
CUST_67697_PI430048170	0.000168	4.6e-06	0.95228	mRNA	NM_001258213	RefSeq	113177538	113208648	PCID2	PCI domain containing 2%2C transcript variant 5		GTTCCTGAAGGCTGTCTTTGTAACTTTTTGTAGTTCTTTGTGTAAAAAGCGTATTCTGAA	NM_001258213
CUST_96465_PI430048170	0.00304	0.000255	1.80166	ncRNA	lnc-IL22RA2-1:2	lncipedia	137023852	137034924			-	GGAATCTTTCATCATGCTTTTCAAACTTGAAACAAACACAGTGCCTAAAAACTTCGCAAT		lnc-IL22RA2-1:2
CUST_89277_PI430048170	0.0018	0.000124	1.80033	ncRNA	lnc-SMARCAL1-2:4	lncipedia	216519329	216529454				CATCAAGAGATGCCAAAATGGAACCAAATCTCCATGAACTCTGCTAATGGAAGACGAGGA		lnc-SMARCAL1-2:4
CUST_135276_PI430048170	0.000168	4.62e-06	-1.17321	mRNA	NM_019557	RefSeq	25820192	25832942	MTFR1L	mitochondrial fission regulator 1-like%2C transcript variant 1		TGTTTGGGTTGAAGCACTACCTGACATTAAAGGAAGGACTTGGAGAGAGAATGCAAAAAA	NM_019557
CUST_130988_PI430048170	0.000168	4.63e-06	0.561852	mRNA	NM_012091	RefSeq	75598348	75623323	ADAT1	adenosine deaminase%2C tRNA-specific 1%2C transcript variant 1		TCCCATGTTGGGGTTACTCAAGGTCCTTATTGGTTCTTCAGCATTTTGTGGCTATAAATA	NM_012091
CUST_132525_PI430048170	0.000168	4.63e-06	1.00624	mRNA	NM_015955	RefSeq	31867809	32010664	MEMO1	mediator of cell motility 1%2C transcript variant 1		CCAGGGGGAGATTTATAGATCCATTGAACATCTAGATAAAATGGGTATGAGTATTATAGA	NM_015955
CUST_70764_PI430048170	0.000169	4.63e-06	-2.53781	ncRNA	lnc-AC017028.1-6:1	lncipedia	239280690	239283113			-	ATTGTAGAGTGGTGTGTACATTGTGGAGTGGTGTACATGGTTTACACACGTGTGTGCATG		lnc-AC017028.1-6:1
CUST_61025_PI430048170	0.0102	0.00129	1.79484	ncRNA	NR_024334	RefSeq	65410592	65412617	FUT8-AS1	FUT8 antisense RNA 1	+	TGAGATACCCAAGTACAAAGCTTTACATTTGCCTAAAAATTCCATTTTTGTCTGGTGTTC	NR_024334
CUST_96937_PI430048170	7.66e-05	1.41e-06	1.79054	ncRNA	lnc-RALA-4:2	lncipedia	39566692	39570580			+	CTGTCAGAGGACAATAAGGGAAAGCTAATGTGGAATACTGGTGTCTAGGAAGGTTATAGA		lnc-RALA-4:2
CUST_140133_PI430048170	0.00017	4.67e-06	-3.19224	mRNA	NM_001303137	RefSeq	24309577	24322531	C1QTNF9	C1q and tumor necrosis factor related protein 9%2C transcript variant 1		CACCATTTTACCCAACAAATCATTGTTCGATCATTATTTGCCAGACTTGAATCTCTATGT	NM_001303137
CUST_107167_PI430048170	0.00017	4.67e-06	-1.15485	ncRNA	lnc-SNRPN-3:1	lncipedia	24993774	24994849				GAGGATAGAGACATTTTTCTTTTGTTGATAGATTGTTCTTTCCCCTTTGCTTAGTCTTCA		lnc-SNRPN-3:1
CUST_78590_PI430048170	0.00017	4.67e-06	0.709584	ncRNA	NR_033416	RefSeq	65038353	65074713	CCT6P3	chaperonin containing TCP1%2C subunit 6 (zeta) pseudogene 3	+	CCTTCATTTTTTGGAAGAAGTCAAAGTAAGCAGAGAGATGGACAAGGAAACACTTAAAGA	NR_033416
CUST_113557_PI430048170	0.00017	4.69e-06	-0.648783	ncRNA	lnc-FNBP1-2:1	lncipedia	129883692	129884170				TTTGTGCTGTGAGACCTAAAGCTCCTATGAGACTGCCCCAAAGCAAAAACATGTCAGCAA		lnc-FNBP1-2:1
CUST_2219_PI430048170	0.0126	0.00172	1.78883	ncRNA	NR_119376	RefSeq	35558736	35607562	FER1L4	fer-1-like family member 4%2C pseudogene (functional)	-	ACTGGTTTGTGAACCCGCTGAAGACCTTTGTCTTCTTCATCTGGCGCCGGTACTGGCGCA	NR_119376
CUST_10651_PI430048170	0.00017	4.7e-06	0.955318	ncRNA	NR_024127	RefSeq	28578537	28581854	SNHG12	small nucleolar RNA host gene 12	+	GCTAATGCAAAAAATTATGCAGTGTGCTACTGAACTTCAGAGGTGATCAATAAAAGAAGA	NR_024127
CUST_97988_PI430048170	0.00161	0.000107	1.78725	ncRNA	lnc-C10orf107-4:1	lncipedia	60778456	60783593			+	ACAGTGCACTCTAATCACTTTTGAAGTTAAACCAATGCCATGGAAAGCAAGCTATTCAAC		lnc-C10orf107-4:1
CUST_55439_PI430048170	0.000171	4.72e-06	0.829739	ncRNA	lnc-CR1L-3:1	lncipedia	207767204	207770362			+	TATTTTGTTTTCCAGTGTCGACTTCTTCCACTACAAAATCTCCAGCGTCCAGTGCCTCAG		lnc-CR1L-3:1
CUST_29856_PI430048170	0.000171	4.72e-06	-2.0924	ncRNA	NR_028505	RefSeq	141531	146300	MIR22HG	MIR22 host gene%2C transcript variant 4	-	ATAAGCAGCCTCAAGGACCAAGAACCATCTGCGAAAGGACACACACAGGAAATTCATAAA	NR_028505
CUST_75471_PI430048170	0.000171	4.73e-06	-1.35625	mRNA	NM_002184	RefSeq	55935096	55994993	IL6ST	interleukin 6 signal transducer%2C transcript variant 1		GCTTTGTCTGAATGATGTTCTTTTATCTCTTGAACACAAGCTTTGAATGATAACTACAGG	NM_002184
CUST_142575_PI430048170	0.000171	4.73e-06	2.4374	mRNA	NM_001289067	RefSeq	94545766	94602099	HELLS	helicase%2C lymphoid-specific%2C transcript variant 2		GGGAGAGATTGGGATTATGCTCTCTGTTGTTTAAGAAACTGTTTGATTTTAGAGTCTATT	NM_001289067
CUST_94722_PI430048170	0.000172	4.75e-06	0.832789	ncRNA	lnc-RAB6C-8:1	lncipedia	129496296	129496788			+	ATGGCAAGCAAGTGGTCTTTGGCAAGATGAAAGAAGGCATGAATATTGTGGAGGCCACAT		lnc-RAB6C-8:1
CUST_110827_PI430048170	0.000172	4.77e-06	-2.86086	ncRNA	lnc-WISP2-1:1	lncipedia	44723656	44728509			+	CCTGAAATCAACTAACCCAAGGGTGAAATTGTTCGAAGTCTCATGTTTTATTGTTTACAA		lnc-WISP2-1:1
CUST_86077_PI430048170	0.000172	4.77e-06	1.09836	mRNA	NM_020156	RefSeq	7182614	7248649	C1GALT1	core 1 synthase%2C glycoprotein-N-acetylgalactosamine 3-beta-galactosyltransferase 1		GCCACTCTTGAATACCATTCTCCACTATTAACATTAATTTACTCAAACCGTTCATAGCAT	NM_020156
CUST_35239_PI430048170	0.000173	4.79e-06	-0.551452	ncRNA	ENST00000410828	ENSEMBL_GENCODE	36267783	36267922	RNU4-53P		-	AACCAGGCTGAGTGCAGTGGCTCATGCCTGTCTTCCCAACACTTTTGTGATCATTTGAGT		ENST00000410828
CUST_28377_PI430048170	0.00127	7.79e-05	1.78347	ncRNA	ENST00000559041	ENSEMBL_GENCODE	89518523	89591956	RP11-429B14.1		+	GTATGTTTTTCAGTAGCATTTTTTATTTACCACATAGGCCTGTAGCAGTTTGTGGTGCCG		ENST00000559041
CUST_111293_PI430048170	0.000173	4.79e-06	-0.555934	ncRNA	lnc-AC110373.1-8:8	lncipedia	119454827	119498084			-	GAAGTGACAAAGTTCTGTCTTGCCTGTTCTCTCACAAAACAGCATATCAATTAAATAATG		lnc-AC110373.1-8:8
CUST_23167_PI430048170	0.00551	0.000565	1.78139	ncRNA	ENST00000432120	ENSEMBL_GENCODE	94577439	94611238	RP11-119K6.6		+	GTAGCTAAGGCCTGGCTGTAGCAGTTATAAACTGTTCTGCAAGTGCGGGAAGTAATAGTT		ENST00000432120
CUST_145327_PI430048170	0.000173	4.8e-06	1.92713	mRNA	NM_002466	RefSeq	43667018	43716496	MYBL2	v-myb avian myeloblastosis viral oncogene homolog-like 2%2C transcript variant 1		ATGCTGCGTTTGTAACCCCAGATCAGAAGTACTCCATGGACAACACTCCCCACACGCCAA	NM_002466
CUST_106624_PI430048170	2.54e-05	2.5e-07	1.78064	ncRNA	lnc-C6orf170-4:1	lncipedia	121858178	121858768				ACCCTGACATCTCTATTGGAGACATGTCAAAAAGCTGGGTGAGATGTGGAATAACTTAAA		lnc-C6orf170-4:1
CUST_139248_PI430048170	0.000173	4.82e-06	0.877743	mRNA	NM_001200016	RefSeq	50296401	50299421	NAT6	N-acetyltransferase 6 (GCN5-related)%2C transcript variant 2		ATGGAAAAAGACATCTGAGGCCATCCAGGGCAAGGAACTGTCTTTCTGGTTCAATAGACT	NM_001200016
CUST_46175_PI430048170	0.000173	4.83e-06	0.83564	ncRNA	lnc-HES1-3:2	lncipedia	194247701	194258883				GAGAAATCCAATATATTTTAAAGCTCTGCTCATGGCATTGGAGGTTAGCCTTGAAAATTA		lnc-HES1-3:2
CUST_97209_PI430048170	0.000174	4.85e-06	0.969835	ncRNA	lnc-PLCH1-4:1	lncipedia	155309426	155309807				CTTCGCAAAAGTCGAGTGGGCAACATATTCATTAAAAATCTGGACAAATCCATTGATAAT		lnc-PLCH1-4:1
CUST_81560_PI430048170	0.0411	0.00866	1.78033	ncRNA	lnc-FAM9C-4:2	lncipedia	13155347	13164815				AACATTGTGTATCCCCTGGACTTTGATCAAATGGACATGGGCTTTCTGATCTACTGCAGA		lnc-FAM9C-4:2
CUST_36717_PI430048170	0.000174	4.86e-06	0.629158	ncRNA	ENST00000582515	ENSEMBL_GENCODE	62372656	62372719	AP003064.2		+	TTCTCCTGGGGCTTCAGTGGCTATGGCTGGCTGGGCTACACAGAGCAGAAGGATGAGATG	AP003064.2
CUST_135538_PI430048170	0.000174	4.87e-06	0.966832	mRNA	NM_001278624	RefSeq	47847232	47914557	NFXL1	nuclear transcription factor%2C X-box binding-like 1%2C transcript variant 3		TGAGGTCTATGTACCTTAATCTCGTTTCTCCTTACCACAATCTTAAATAGATTTCAGCTG	NM_001278624
CUST_145173_PI430048170	0.000174	4.87e-06	-3.73685	mRNA	NM_001271733	RefSeq	16754633	16764480	MST1L	macrophage stimulating 1-like		CCTGAAAACTGGTGGTGTGATTGTTGAATGGGTTAGGGGTATAGCAGAGAAACTCAGTGT	NM_001271733
CUST_27740_PI430048170	0.000174	4.87e-06	-2.91805	ncRNA	ENST00000616754	ENSEMBL_GENCODE	39588357	39588882	CTD-2033D15.3		+	TGGAAAGAATGCTGGGGAAGAGGGTGAGTTTGTTTTTCATTAAAAGAAGTTGCTGAGCCT		ENST00000616754
CUST_141504_PI430048170	0.000175	4.88e-06	2.51239	mRNA	NM_016354	RefSeq	62642444	62672295	SLCO4A1	solute carrier organic anion transporter family%2C member 4A1		CTGAGGAAGGCTTGTGTGTCCTCAGTTAAAACTGTGCATATCGAAATATATTTTGTTATT	NM_016354
CUST_122156_PI430048170	0.000176	4.92e-06	0.989592	ncRNA	NONHSAT080449	NONCODE	56459427	56459583			+	AATAAAATCAGGTACAACTCCAAAAGGAGACATTGAAGAAGAACCAAGCTAGCCCTATAA		NONHSAT080449
CUST_103435_PI430048170	0.000176	4.92e-06	-0.78537	ncRNA	lnc-NARG2-7:1	lncipedia	61038825	61229233			-	TCTTCAAATATCCCTTTACCCTCTTGCCTCAAAAAGGAAGGCAGTGAAGAGCAGCAGCAA		lnc-NARG2-7:1
CUST_115429_PI430048170	0.000176	4.93e-06	-1.98049	ncRNA	lnc-C2orf67-2:1	lncipedia	210217474	210225447			-	ACCGCTCATGCACTCTTGCACATTTTTTGAATGTGGGATAATAAGAAAATCCTTTTAAGT		lnc-C2orf67-2:1
CUST_68011_PI430048170	0.000176	4.94e-06	-1.16727	mRNA	NM_001024807	RefSeq	35868498	35879797	APLP1	amyloid beta (A4) precursor-like protein 1%2C transcript variant 1		AAGGGGTTTCCCTTTCCACTCATCGGAGATTCAGAGGGATGAGCTGCACCAGCTGGGACA	NM_001024807
CUST_109887_PI430048170	0.000176	4.94e-06	-1.42182	ncRNA	lnc-ISCA2-3:1	lncipedia	74482984	74483435			+	ATATGAAGAATGGCCAAGGTTTTGCACTAGTATATTCAGTCCACGTTTGACTTACAGGAC		lnc-ISCA2-3:1
CUST_42025_PI430048170	0.000176	4.95e-06	-1.19453	ncRNA	NR_037631	RefSeq	7745	8567	LOC100288911	uncharacterized LOC100288911		TCTCAGTTCACGGACAAAAGTGGTGGGTTTTCATTGTCTTCACTGATTGTCAATGCATTA	NR_037631
CUST_88177_PI430048170	0.000177	4.96e-06	-2.26341	ncRNA	lnc-NNMT-3:1	lncipedia	114212597	114213529			+	AATTTGGACTGATAGGGCACCACTGTGAAAAAGGTGTGAAGAAAGATCTGCTTCTTGCTC		lnc-NNMT-3:1
CUST_132977_PI430048170	0.000177	4.97e-06	-0.599569	mRNA	NM_001037984	RefSeq	81244810	81295339	SLC38A10	solute carrier family 38%2C member 10%2C transcript variant 1		CTCATGGTTGGCCCAGCCCTCCATTGTCTGTGTTTTTCAAAATCCAATTGTGGCTTTTTT	NM_001037984
CUST_35477_PI430048170	0.000178	4.99e-06	0.81344	ncRNA	ENST00000384370	ENSEMBL_GENCODE	32841861	32841995	SNORA70			TTGGTAGTGTACGCAGCCTGTTTCTTGTATGCGTTGCTCTAAGGGACCTTGGAGACAGGC		ENST00000384370
CUST_141472_PI430048170	0.000178	5e-06	-3.21872	mRNA	NM_001271803	RefSeq	138439000	138446969	REEP2	receptor accessory protein 2%2C transcript variant 1		AGAGGGTGCCCATTGGACCTTTGGCACTGGATGAGCCAATAAACCAAACTCTGGCACCTC	NM_001271803
CUST_64520_PI430048170	0.000178	5e-06	0.781585	mRNA	NM_017814	RefSeq	19119615	19138501	TMEM161A	transmembrane protein 161A%2C transcript variant 1		TGGCAAGGGTGATGCTGGCTGCTCTTCTGAACAAATAAAGGAGCATGCCGATTTTTACAA	NM_017814
CUST_130887_PI430048170	0.000178	5e-06	-0.678702	mRNA	NM_021005	RefSeq	96330881	96340263	NR2F2	nuclear receptor subfamily 2%2C group F%2C member 2%2C transcript variant 1		CACAGGCCCTTTTCCTTGTTTGTTTTGTGTTAGTTTATTGTAAACAGCCATTTGTTGTAA	NM_021005
CUST_35979_PI430048170	0.000178	5e-06	-2.04534	ncRNA	ENST00000607417	ENSEMBL_GENCODE	115126316	115126444	SNORA35		-	AATTTCCTTTTTCCACGAGAAACATCCCTGCAGTGGGTTGTTCCTATCGACAGGAGGTTA		ENST00000607417
CUST_57537_PI430048170	0.000179	5.03e-06	-2.71677	ncRNA	lnc-OR8J3-2:1	lncipedia	56142515	56143387			-	CCTCAGGTTTAACCTCTTGATCTACAGCTTTAGCAACTTAGGGGTTAAAAATGTCTTTTA		lnc-OR8J3-2:1
CUST_55767_PI430048170	0.000179	5.04e-06	-1.31038	mRNA	NM_020066	RefSeq	240091884	240475189	FMN2	formin 2		TTATAATCAGTGCTTTCCCAACTCTTGGGTTGCTCTCCATAACTATGTATTTGTGAAAGA	NM_020066
CUST_142141_PI430048170	0.00018	5.07e-06	0.524991	mRNA	NM_022908	RefSeq	52524368	52535077	NT5DC2	5'-nucleotidase domain containing 2%2C transcript variant 2		TCCACCCAGACAAGCAATAAAAGTGGTCTCCTCCCTGTGCATGCTTCTGCTTTCAAAAAA	NM_022908
CUST_63559_PI430048170	0.00018	5.08e-06	-2.13176	ncRNA	lnc-AATK-2:1	lncipedia	81110482	81112960			+	GAACCGGAAGGAGGTCCATACCCAACTCGTGCAATAAATAAAACTTTTATTCAAACAAGT		lnc-AATK-2:1
CUST_74201_PI430048170	0.00402	0.000369	1.77882	ncRNA	lnc-FGFBP1-2:1	lncipedia	15864937	15865940				AGACAGAGATGGATGTGAAATTCCAGACCAATTTGTTGTAGGATATGTCCTTGACTATAA		lnc-FGFBP1-2:1
CUST_137541_PI430048170	0.00018	5.09e-06	-2.03023	mRNA	NM_000803	RefSeq	72216774	72221950	FOLR2	folate receptor 2 (fetal)%2C transcript variant 1		CCATGGTGGGGCCAAGAGTCACTTCTAATAAACAGACTGTTTTCTAATAATTCCAAAAAA	NM_000803
CUST_70267_PI430048170	0.00018	5.09e-06	-1.14186	ncRNA	ENST00000565104	ENSEMBL_GENCODE	178400834	178402891	RP11-65L3.1			TGTGCCTCTTCAATGAATGTTGTATATGAGAATGTTACATTTGTAACAGCACAGGAAACT		ENST00000565104
CUST_143718_PI430048170	0.00018	5.1e-06	4.44627	mRNA	NM_003667	RefSeq	71439769	71586308	LGR5	leucine-rich repeat containing G protein-coupled receptor 5%2C transcript variant 1		CTTACCTTCTATTATCCTATATTAGCTTCAATACATCCAAACCAAATGGCTGTTAGGTAG	NM_003667
CUST_109380_PI430048170	0.00018	5.1e-06	0.856788	ncRNA	lnc-AGBL2-1:4	lncipedia	47729967	47731562			-	TTTATGACACACATAGTTGATACTGTCTGGTAAAAGGAGGCTCTTGAGCCATTCCTATTT		lnc-AGBL2-1:4
CUST_144227_PI430048170	0.00018	5.1e-06	1.12582	mRNA	NM_020892	RefSeq	1314	5014	DTX2	deltex 2%2C E3 ubiquitin ligase%2C transcript variant 1		GGTCAGCTTCTTTTACCTCAATTTTGTTTGCAATAAATGCTCTATAGCCAAAGCCAAAAA	NM_020892
CUST_122011_PI430048170	0.000181	5.11e-06	-1.2834	ncRNA	ENST00000625132	ENSEMBL_GENCODE	242001209	242006013	AC093642.1			CTCGGGTTAGGAGCACTCGCTCTGGAGGCCTGACTGTGCTTTTGTAAATTTTCACAAACA		ENST00000625132
CUST_28890_PI430048170	0.000181	5.12e-06	-4.29581	ncRNA	ENST00000624545	ENSEMBL_GENCODE	15790975	15792717	AF001548.3		-	TCGACCCTGGGAGCCAGGACCAGCTGCAGAATTTGTAGAATTTTGCAAAATGAAAATGCT		ENST00000624545
CUST_31090_PI430048170	0.0277	0.00503	1.77808	ncRNA	ENST00000576963	ENSEMBL_GENCODE	79823452	79827704	RP11-353N14.2		-	CCTTATCCAAACAGTTCACACGAAGACCAGATCCAAAAATAAAAGTGTGCTTTGTCCTCT		ENST00000576963
CUST_19906_PI430048170	0.000181	5.14e-06	-2.54391	ncRNA	NR_038346	RefSeq	79452956	79471208	MAGI2-AS3	MAGI2 antisense RNA 3%2C transcript variant 4	-	TCACACTTCCTGCTATAAAAGCATTGCTATTATAAGGTTAATCTGCAGAAACAGACTTCT	NR_038346
CUST_135854_PI430048170	0.000182	5.15e-06	2.1486	mRNA	NM_173084	RefSeq	160435502	160449838	TRIM59	tripartite motif containing 59		TTAACTATTGTGTGGGCAAAGAACATTTAAAGGGCATAGTAGAGGTAAGGAGAGACACAT	NM_173084
CUST_38094_PI430048170	6.45e-05	1.08e-06	1.77711	ncRNA	NR_038856	RefSeq	234724041	234731643	LINC01132	long intergenic non-protein coding RNA 1132		CCAACAATCATTCTTTCTCGCATATTCACTTGTGAATAAATGCAAGAACTGGTGTATTTG	NR_038856
CUST_65771_PI430048170	0.000182	5.17e-06	-2.14251	ncRNA	lnc-STON1-1:2	lncipedia	48529382	48531917			+	CAGATTCTGAACAACCCCTTAAAAAACAGGTCCAAGTATTGAACCATTTGGAAATAAAGA		lnc-STON1-1:2
CUST_107922_PI430048170	0.000182	5.17e-06	-3.63992	ncRNA	ENST00000515376	ENSEMBL_GENCODE	173530460	173591324	HAND2-AS1		+	GAGACATCCAGGTTCTTGTTAGTGTGGACGAACTATCCATGAAGATCTTAAATGCAGGAG		ENST00000515376
CUST_80720_PI430048170	0.000182	5.17e-06	-1.65529	ncRNA	lnc-FAM75A6-6:1	lncipedia	67203633	67208083			+	GTCCAAGGGTTTAGAACTGAATGGGAATGTCTGTAAATGGATCTGATGGAGGTTGGAATG		lnc-FAM75A6-6:1
CUST_12240_PI430048170	0.000182	5.18e-06	-1.70584	ncRNA	ENST00000417120	ENSEMBL_GENCODE	243793205	243794400	AKT3-IT1		-	GTTTTCTAGAGCCTGCAGCATGTGTGGGTCAGTTGAAAATGTATAAAAATTTTGAGTTAC		ENST00000417120
CUST_6817_PI430048170	0.000182	5.19e-06	0.760609	ncRNA	NR_003703	RefSeq	8086407	8086533	SCARNA27	small Cajal body-specific RNA 27	-	GAGGGTTTGTCTTTTGGAAAAACAAAGTCGTTTTCTCCTCTGAAAAAGCCTCCTACATAG	NR_003703
CUST_38763_PI430048170	0.000182	5.19e-06	-2.30358	ncRNA	ENST00000500276	ENSEMBL_GENCODE	25944857	25958578	RASSF8-AS1		+	TAGCCTATCTTGCCATTTAGCCACTGTTACTGATAATTTGGATGGAAAAGAAAAATAAAT		ENST00000500276
CUST_136170_PI430048170	0.000182	5.19e-06	1.05	mRNA	NM_018224	RefSeq	43639246	43729541	COA1	cytochrome c oxidase assembly factor 1 homolog (S. cerevisiae)%2C transcript variant 1		CTAACTTGGGCACAACAAATGCTATTTGTCATTTTTAAACTGAATCCGAAAGAAACTCCT	NM_018224
CUST_70113_PI430048170	0.000182	5.2e-06	0.650422	ncRNA	lnc-GCLM-1:1	lncipedia	93921267	93921667				AAAGCTCTGTGAGGGTTTCACTAAGGTGTTGAAACAGTGCAGACTTGCAGGTGAATTAGC		lnc-GCLM-1:1
CUST_55284_PI430048170	0.00282	0.00023	1.77463	ncRNA	lnc-CDC73-8:1	lncipedia	193505208	193506045			+	AAGAGTAATAGAAATATATTTTTGCTTCCTTATTTATGCATATATCTGTATACATGTTTA		lnc-CDC73-8:1
CUST_49668_PI430048170	0.04	0.00829	1.77385	ncRNA	NR_122111	RefSeq	19062376	19107497	LINC01296	long intergenic non-protein coding RNA 1296%2C transcript variant 1		TGCTCACTGAAGAAAATTCCTAGAACAATTCAGGGTCCTTTCATAACCTCTACTCTGAGG	NR_122111
CUST_76048_PI430048170	3.99e-05	5.04e-07	1.7734	ncRNA	NR_003141	RefSeq	139273751	139279628	SNHG4	small nucleolar RNA host gene 4%2C transcript variant 1	+	GCTCAGATGGGGGTAGGGGACTTAAAATTATGATGTGAAAAATTATGTAGAGTATCAGAC	NR_003141
CUST_129713_PI430048170	0.000182	5.21e-06	-1.43672	mRNA	NM_022351	RefSeq	90791692	90959402	NECAB1	N-terminal EF-hand calcium binding protein 1		GTATTCCAAACCTGTTCTTCTGTTTCTGTGGCACCTAGGTTTAAAATATGTATTAATGTG	NM_022351
CUST_63151_PI430048170	0.000182	5.21e-06	0.926774	ncRNA	lnc-ZNF652-2:1	lncipedia	49405067	49407473			-	TAATATACAGGAGCAGTTTGGGCAGCCAGAGAGTCTGGGTGTAAACTCAGTTTGGATACA		lnc-ZNF652-2:1
CUST_137492_PI430048170	0.000182	5.21e-06	-3.66164	mRNA	NM_001001522	RefSeq	117199323	117204792	TAGLN	transgelin%2C transcript variant 1		CTGGTTTATGAAGAAAGCGCAGGAGCATAAGAGGGAATTCACAGAGAGCCAGCTGCAGGA	NM_001001522
CUST_95727_PI430048170	0.000183	5.23e-06	0.694448	ncRNA	lnc-RAD17-3:1	lncipedia	69333928	69334249			+	TTTCAGGGGAGGAAGTAATGCTGAGCCTGCGAGGCCTGACATCACTTACCAGGAGCCTCA		lnc-RAD17-3:1
CUST_34601_PI430048170	0.000183	5.24e-06	-1.1823	ncRNA	ENST00000623458	ENSEMBL_GENCODE	39379610	39380015	RP3-333H23.9		+	TTCACTCTCTACCTCTTCACTAAGTGGCTCTTTAGGTTGTTGGTTGACTTAGTGCCTCGT		ENST00000623458
CUST_69184_PI430048170	0.000183	5.24e-06	-1.3426	ncRNA	ENST00000553108	ENSEMBL_GENCODE	25085271	25110455	SNHG14			ATCTGATATGTCACTTTTACCGGCTTCCTCAACTGAAAAAGAATACAATGAAACACGCTG		ENST00000553108
CUST_117103_PI430048170	0.000183	5.25e-06	-1.64034	ncRNA	NR_033711	RefSeq	3735983	3747373	TP73-AS1	TP73 antisense RNA 1%2C transcript variant 1	+	TTTTCAGGATGGGACTTCAGACCAAGGACACAAGTTGGGCTTGCTTAGGTGTTTTGTGTT	NR_033711
CUST_25372_PI430048170	0.0423	0.009	1.77308	ncRNA	ENST00000549888	ENSEMBL_GENCODE	75964440	75967062	RP11-290L1.5		+	TACTCTGCGCACACTATTCCTCATTACAGAAAGTGCTCAATAAACTTCTGTATGCTCCTA		ENST00000549888
CUST_51460_PI430048170	0.0351	0.00693	1.77291	ncRNA	ENST00000513572	ENSEMBL_GENCODE	89681512	89694130	RP11-115D19.1			CACAAAATAATAATAGCTGCTATTTGAAAACATAGTTTTCTTGAAAGTTAAAATAGTAAT		ENST00000513572
CUST_113722_PI430048170	0.000185	5.31e-06	0.738461	mRNA	NM_001304464	RefSeq	203861584	203871152	SNRPE	small nuclear ribonucleoprotein polypeptide E%2C transcript variant 2		CTGGGTCGGATCATGCTAAAAGGAGATAATATTACTCTGCTACAAAGTGTCTCCAACTAG	NM_001304464
CUST_57248_PI430048170	0.000185	5.31e-06	0.699799	mRNA	NM_148976	RefSeq	14504875	14643634	PSMA1	proteasome (prosome%2C macropain) subunit%2C alpha type%2C 1%2C transcript variant 1		GTTGGTCTCCTTATTGCTGGTTATGATGATATGGGCCCTCACATTTTCCAAACCTGTCCA	NM_148976
CUST_82557_PI430048170	0.000185	5.32e-06	0.83988	ncRNA	lnc-FAM18A-6:1	lncipedia	10936008	10938136			-	TGCCAGGCCTATTTCATACGCACTCTTCCAACTTTTTCCTGAATTAAAAACAAACAAACA		lnc-FAM18A-6:1
CUST_118014_PI430048170	0.000185	5.32e-06	-0.857519	ncRNA	lnc-MDH1B-5:1	lncipedia	206787629	206787968			+	GGTTTCCACAGGGTCTAAATCAAAGCCCTGCACTTGATAATGTTTTAAGGCTTCAAATAT		lnc-MDH1B-5:1
CUST_115260_PI430048170	0.00012	2.79e-06	1.77117	ncRNA	lnc-CCT8L2-4:1	lncipedia	16645694	16646581				GGAGCACTCTTTTTGGCCTACGAATATACCAGGAAGTTGATTATGAGCCAGTTGGAAGCA		lnc-CCT8L2-4:1
CUST_142830_PI430048170	0.000185	5.32e-06	-1.84061	mRNA	NM_001006938	RefSeq	102139960	102142416	TCEAL6	transcription elongation factor A (SII)-like 6		CGCTCTATATTTTAGTAGAGGATTTTCACCCATGTGCATGGAAAAGATGTTCATGGTACA	NM_001006938
CUST_55388_PI430048170	0.000185	5.32e-06	-2.03609	mRNA	NM_001005388	RefSeq	204828653	205022822	NFASC	neurofascin%2C transcript variant 1		GGCTGGAGTTCAACAGATGTAAAGACTTCAGTGAAGCAATAAACACAAAACTCTGGGAGA	NM_001005388
CUST_30303_PI430048170	0.000185	5.33e-06	-1.20604	ncRNA	ENST00000582367	ENSEMBL_GENCODE	29621617	29622254	RP11-68I3.10		-	AGAATTCAGGCCCCAAATCCTAGCCACTTACATTAAACAGCATTTTACACAGCAAAATAA		ENST00000582367
CUST_113982_PI430048170	0.000152	4.01e-06	1.77052	ncRNA	lnc-CAPZA2-3:1	lncipedia	116736097	116736353			+	GTGTAAGAAAGAACTTTTTATAAATAATAATTTCAGTTATGTCCATAACTAAAAATCAAG		lnc-CAPZA2-3:1
CUST_100267_PI430048170	0.000185	5.34e-06	-2.49316	mRNA	NM_033254	RefSeq	113211464	113287463	BOC	BOC cell adhesion associated%2C oncogene regulated%2C transcript variant 2		ACAATGATAGTGACTACAAGAAGGATATGGTGGAAGGGGACAAGTACTGGCACTCCATCA	NM_033254
CUST_57949_PI430048170	0.000185	5.34e-06	0.980819	mRNA	NM_001007027	RefSeq	78100941	78139653	ALG8	ALG8%2C alpha-1%2C3-glucosyltransferase%2C transcript variant 2		TGCTCTTCACTGCACCAGAACTTCCCATTAAAATCTTACTCATGTTACTATTCACCATAT	NM_001007027
CUST_57247_PI430048170	0.000185	5.34e-06	0.722813	mRNA	NM_148976	RefSeq	14504875	14643634	PSMA1	proteasome (prosome%2C macropain) subunit%2C alpha type%2C 1%2C transcript variant 1		CCCAATCAGCTCGTACTTACTTGGAGAGACATATGTCTGAATTTATGGAGTGTAATTTAA	NM_148976
CUST_107555_PI430048170	0.000185	5.34e-06	0.956555	mRNA	NM_002528	RefSeq	2039814	2047866	NTHL1	nth endonuclease III-like 1 (E. coli)		TGAAGTGGCTTTACGCTTCAGGAAGCCACGCCTGTTGAATAAAGCTTTGGTGTGTTTGCA	NM_002528
CUST_70003_PI430048170	0.000324	1.16e-05	1.76887	ncRNA	lnc-RNASEH2B-3:35	lncipedia	50293421	50415202				CCCAAATGAGCAGGATTGCTTTTGCTTTCAAAAGAGTGATACCTGGAGCACAGGTATTCT		lnc-RNASEH2B-3:35
CUST_84042_PI430048170	0.000263	8.78e-06	1.76885	ncRNA	NR_110114	RefSeq	19918980	20140426	LOC101927668	uncharacterized LOC101927668	+	ATCTGAGAAGAGCTATTGTAAGACTGGGAATCAAGTAACAAAATAAAGATATGAACCGTC	NR_110114
CUST_140416_PI430048170	0.000185	5.35e-06	-1.66614	mRNA	NM_006449	RefSeq	37641881	37672199	CDC42EP3	CDC42 effector protein (Rho GTPase binding) 3%2C transcript variant 1		GCATCATGTGGAAGAATGGGAACTATGCTTACTTTATGAAGTGATGTATAACACAATGAA	NM_006449
CUST_654_PI430048170	0.00193	0.000137	1.76828	ncRNA	NR_110782	RefSeq	22723490	22786837	LOC101927571	uncharacterized LOC101927571		CCAACCCACTGATAACCTTTGGTTTGCTTTGATAACTATGAAATAAATTCTCACTGCATT	NR_110782
CUST_108483_PI430048170	6.11e-05	9.75e-07	1.76693	ncRNA	lnc-DNAJB1-1:1	lncipedia	14527366	14529253			+	GGGAAAAACAGATGAAAACCTGAAGGTGTTCTGTATGTGTGCTTTCAAAAGCAAGGATCT		lnc-DNAJB1-1:1
CUST_120364_PI430048170	0.000185	5.37e-06	-1.91237	ncRNA	NR_022011	RefSeq	24981993	24983790	PWARSN	Prader Willi/Angelman region RNA%2C SNRPN neighbor		GTGAGAAGTCCTCTCTTGCATGGTGAGATGGGGAACATTTAATTCAATAGAAATATTTGA	NR_022011
CUST_52699_PI430048170	0.000185	5.37e-06	-0.998046	ncRNA	lnc-LRRC36-1:1	lncipedia	67432691	67435028			+	ATTCAAATGTAGGTCTGTTCTCTTCTTCATCTATCATGGTCCCTGTCCTGGAGGCAAGTC		lnc-LRRC36-1:1
CUST_109382_PI430048170	0.000185	5.38e-06	0.779651	mRNA	NM_015231	RefSeq	47778117	47848505	NUP160	nucleoporin 160kDa		ACAGATCCTTGCAACTATCAGTTAATTCCAGCAGTACCTGGAATATCTCCTAATTCCACC	NM_015231
CUST_130445_PI430048170	0.000185	5.38e-06	0.794571	mRNA	NM_153818	RefSeq	2404801	2412571	PEX10	peroxisomal biogenesis factor 10%2C transcript variant 1		GCCAGAGAGTTCACCGTAGGCATCTTTAATAAACTAACTCCAGCAAAATGTGGGTACGTT	NM_153818
CUST_136041_PI430048170	0.000186	5.39e-06	3.58981	mRNA	NM_005555	RefSeq	52446650	52452126	KRT6B	keratin 6B%2C type II		ATCTGACAAGTCAGTTGTCCTGATCTTCTCTTGCAGTGTCCCTGAATGGCAAGTGATGTA	NM_005555
CUST_143876_PI430048170	0.000186	5.39e-06	1.53873	mRNA	NM_001032291	RefSeq	109279553	109283168	PSRC1	proline/serine-rich coiled-coil 1%2C transcript variant 3		TCTGTGACTCCTAATAGGCCAGTTTGTGATAAGCTTACTCTATGAGTCTTCATTTTTCTA	NM_001032291
CUST_88333_PI430048170	0.000186	5.4e-06	-4.10353	ncRNA	NR_110151	RefSeq	64561345	64590084	ADAMTS9-AS1	ADAMTS9 antisense RNA 1%2C transcript variant 2	-	GCATCTGTCATTTAAAATGACTGGCCAGTTGCACGTTTAAAAGCAAAGATAAAATTGCTA	NR_110151
CUST_110518_PI430048170	0.000186	5.41e-06	-2.5423	mRNA	NM_024692	RefSeq	29115425	29183813	CLIP4	CAP-GLY domain containing linker protein family%2C member 4%2C transcript variant 1		TCTTTTTGATCCCAAAACTTCAGTTTCAGAATTATTTGCCATTTTGAGACAGTGGGTTCC	NM_024692
CUST_73346_PI430048170	0.000186	5.41e-06	-2.40108	ncRNA	lnc-CCDC80-1:3	lncipedia	112640720	112649447			-	CAATACTTCTTCAGGAGGATTTTCTGAAGCCCCAGTGGCTGCTGTTGTTTGAGTTTGGTT		lnc-CCDC80-1:3
CUST_133754_PI430048170	0.000186	5.41e-06	-1.2174	mRNA	NM_139173	RefSeq	102900927	103019739	SLC9B1	solute carrier family 9%2C subfamily B (NHA1%2C cation proton antiporter 1)%2C member 1%2C transcript variant 1		GGATTTAGTAAACATGTGATTTCAGTACAGGGCTTTTCTTGGACTTTTTACTCCAAAGTT	NM_139173
CUST_127942_PI430048170	0.000186	5.41e-06	1.01323	mRNA	NM_016027	RefSeq	70637265	70669212	LACTB2	lactamase%2C beta 2		AGCACAGATTTCTATGCACCTTTACTCTTTCCTCAACCCTTGTCTCTATCTGTACATAAT	NM_016027
CUST_41259_PI430048170	0.000186	5.42e-06	-1.81924	ncRNA	NR_028303	RefSeq	107109789	107240638	LINC00882	long intergenic non-protein coding RNA 882	-	TGCACCTGCCATCTTATGCAGAAATGACCTGAAGACAGACTGAAACAACGTGTTCTACAG	NR_028303
CUST_7666_PI430048170	0.000186	5.43e-06	0.715097	ncRNA	NR_003942	RefSeq	173866634	173866715	SNORD76	small nucleolar RNA%2C C/D box 76		TTTGCTACTCTTGAGTGCTAGAATGATGAGGATCTTAACCACCATTATCTTAACTGAGGC	NR_003942
CUST_93998_PI430048170	0.000186	5.43e-06	-1.93627	mRNA	NM_001142699	RefSeq	83455012	85627270	DLG2	discs%2C large homolog 2 (Drosophila)%2C transcript variant 1		AGAAAAGACATTGCAGTATGAAGGAAGGCTTTGGTTTGCTCAAAGTGCCAGGTGTAGGGA	NM_001142699
CUST_111910_PI430048170	0.000186	5.44e-06	0.635246	ncRNA	lnc-PRAGMIN.1-10:1	lncipedia	8116744	8116949				ATGAGACCTCCTGCCTATCTCATGATGGTGCCCAGTCAGCCCAGAATGACTCGACCAGAC		lnc-PRAGMIN.1-10:1
CUST_74180_PI430048170	0.000186	5.45e-06	-1.89439	ncRNA	lnc-CLNK-2:3	lncipedia	10450886	10457176			-	CATCTTTGGCTCATGCTGTACCTTATTCTACATTAGAAAACTCACTGTATGTTGCTAAAT		lnc-CLNK-2:3
CUST_39598_PI430048170	0.000186	5.45e-06	-0.950476	ncRNA	NR_110909	RefSeq	14009275	14016018	LOC101927311	uncharacterized LOC101927311		AACATGAAGGATTGTGAAGGCAAAAGATGAACCAGCCAGCCTAGTCTCTGGATGCATAAG	NR_110909
CUST_128797_PI430048170	0.000186	5.45e-06	0.985924	mRNA	NM_001031827	RefSeq	30192934	30194306	BOLA2	bolA family member 2		GAGCGACAGAAATGAGGGACTGGGATCTGCACAGCCATTAAATTATAAATCTGGAAAAAA	NM_001031827
CUST_25950_PI430048170	0.0126	0.00173	1.76553	ncRNA	ENST00000622182	ENSEMBL_GENCODE	132424504	132425208	RP13-714J12.1			GAACCTTTGGTTTGCGTGTACCTTTAGATGCTCGGATTAAATTACACCCATAATGCATTA		ENST00000622182
CUST_126691_PI430048170	0.000187	5.47e-06	-0.646809	mRNA	NM_012207	RefSeq	68332010	68343196	HNRNPH3	heterogeneous nuclear ribonucleoprotein H3 (2H9)%2C transcript variant 2H9		CCCTTTGATCAATATGGCTTTTTTCCAAATTGGCTAATGGATCAAAATGAAACCTGTTGA	NM_012207
CUST_127450_PI430048170	0.000187	5.47e-06	-2.51108	mRNA	NM_001541	RefSeq	111912735	111914093	HSPB2	heat shock 27kDa protein 2		GTCATAGCCTTGGTTTAGTTTTGGGTGGAGCTGAATAAACCCAAATCTCAGGGCAAAAAA	NM_001541
CUST_97180_PI430048170	0.000187	5.48e-06	0.517073	ncRNA	lnc-ADD1-1:8	lncipedia	2934898	2941869			-	TCCATTCGCCTTCCTGTGTAGCCAGGCTGTTAAAAAGCTGCTTTACTTTCCGCTTTCTTT		lnc-ADD1-1:8
CUST_61585_PI430048170	0.000188	5.52e-06	-1.81222	ncRNA	ENST00000551631	ENSEMBL_GENCODE	24979557	25022666	SNHG14		+	ATTCAACCCCATGGATACGTTAGTCACTGTCCAGATGATGGCAAGTCTTTCTCAGAAGCA		ENST00000551631
CUST_92255_PI430048170	0.000188	5.52e-06	0.923275	ncRNA	lnc-FAM58A-2:2	lncipedia	153455740	153469268			-	GGGAGAGTGCTGCCAAGTTGCACGCGCTTAGAACGGAGTACTTTGCACAGCATGAGCAAG		lnc-FAM58A-2:2
CUST_127503_PI430048170	0.000188	5.53e-06	0.906613	mRNA	NM_001284388	RefSeq	102152175	102163871	NOLC1	nucleolar and coiled-body phosphoprotein 1%2C transcript variant 1		CTGTTCATGCTGACACAGATATTTCAGTCTGCATGGTAAAAGTTCTAAATCTTACTACAA	NM_001284388
[truncated: 63,599 more rows]
